# Supplementary material for: Cacao (Theobroma cacao L.) Response to Water Stress: Physiological Characterization and Antioxidant Gene Expression Profiling in Commercial Clones
Source: Front Plant Sci. 2021 Sep 6;12:700855. doi: 10.3389/fpls.2021.700855 (PMC8450537; doi:10.3389/fpls.2021.700855)
Supplement: Supplementary file 2 [file Table_1.XLSX]

## Sheet: Ct values 
Clone	Gen	DAT	Ct
EET8	ACPB	0	23.4894
EET8	ACPB	0	23.7896
EET8	ACPB	0	24.19
EET8	ACPB	23	23.6596
EET8	ACPB	23	23.5789
EET8	ACPB	23	23.648
EET8	ACPB	26	22.5408
EET8	ACPB	26	22.9686
EET8	ACPB	26	23.7906
EET8	ADH	0	24.7874
EET8	ADH	0	29.0239
EET8	ADH	0	30.7911
EET8	ADH	23	22.3514
EET8	ADH	23	24.131
EET8	ADH	23	25.4572
EET8	ADH	26	23.4021
EET8	ADH	26	24.0706
EET8	ADH	26	27.434
EET8	GST	0	21.338
EET8	GST	0	24.5551
EET8	GST	0	24.6801
EET8	GST	23	18.1368
EET8	GST	23	19.2559
EET8	GST	23	19.7152
EET8	GST	26	19.8322
EET8	GST	26	21.099
EET8	GST	26	22.1432
EET8	Hsp17.6	0	24.7128
EET8	Hsp17.6	0	25.1037
EET8	Hsp17.6	0	25.3473
EET8	Hsp17.6	23	22.6041
EET8	Hsp17.6	23	22.6294
EET8	Hsp17.6	23	22.6576
EET8	Hsp17.6	26	23.9418
EET8	Hsp17.6	26	24.7722
EET8	Hsp17.6	26	27.3049
EET8	LDH	0	24.4512
EET8	LDH	0	25.1015
EET8	LDH	0	25.4329
EET8	LDH	23	22.7473
EET8	LDH	23	22.8662
EET8	LDH	23	22.9793
EET8	LDH	26	24.1291
EET8	LDH	26	24.6564
EET8	LDH	26	28.217
EET8	NTRC	0	23.6553
EET8	NTRC	0	23.7514
EET8	NTRC	0	24.6689
EET8	NTRC	23	21.8997
EET8	NTRC	23	22.3623
EET8	NTRC	23	22.4769
EET8	NTRC	26	22.8784
EET8	NTRC	26	25.2365
EET8	NTRC	26	27.3516
EET8	PDC	0	23.1511
EET8	PDC	0	23.4006
EET8	PDC	0	25.1532
EET8	PDC	23	21.5181
EET8	PDC	23	21.6854
EET8	PDC	23	22.0857
EET8	PDC	26	22.3301
EET8	PDC	26	22.3376
EET8	PDC	26	24.1477
EET8	RBOHF	0	24.7457
EET8	RBOHF	0	24.9717
EET8	RBOHF	0	25.1856
EET8	RBOHF	23	22.0776
EET8	RBOHF	23	22.4774
EET8	RBOHF	23	22.5435
EET8	RBOHF	26	23.7948
EET8	RBOHF	26	26.7528
EET8	RBOHF	26	27.9312
EET8	SOD	0	24.9319
EET8	SOD	0	28.342
EET8	SOD	0	33.6198
EET8	SOD	23	20.9717
EET8	SOD	23	23.4957
EET8	SOD	23	25.1859
EET8	SOD	26	22.9186
EET8	SOD	26	23.0554
EET8	SOD	26	28.3246
EET8	UDPGT	0	24.4296
EET8	UDPGT	0	24.7518
EET8	UDPGT	0	25.2539
EET8	UDPGT	23	21.9437
EET8	UDPGT	23	22.0298
EET8	UDPGT	23	22.2887
EET8	UDPGT	26	23.711
EET8	UDPGT	26	26.5888
EET8	UDPGT	26	27.8581
ICS60	ACPB	0	22.7089
ICS60	ACPB	0	23.8688
ICS60	ACPB	0	24.8672
ICS60	ACPB	23	24.6548
ICS60	ACPB	23	23.345
ICS60	ACPB	23	24.2742
ICS60	ACPB	26	22.5865
ICS60	ACPB	26	22.659
ICS60	ACPB	26	22.7318
ICS60	ADH	23	21.9138
ICS60	ADH	23	22.6068
ICS60	ADH	23	27.1875
ICS60	ADH	0	24.0207
ICS60	ADH	0	26.6254
ICS60	ADH	0	28.342
ICS60	ADH	26	22.7928
ICS60	ADH	26	24.5353
ICS60	ADH	26	25.3523
ICS60	GST	23	16.7692
ICS60	GST	23	17.6623
ICS60	GST	23	20.5722
ICS60	GST	0	20.5509
ICS60	GST	0	22.5951
ICS60	GST	0	25.1272
ICS60	GST	26	20.4448
ICS60	GST	26	20.7425
ICS60	GST	26	22.395
ICS60	Hsp17.6	23	21.5105
ICS60	Hsp17.6	23	22.5363
ICS60	Hsp17.6	23	23.7711
ICS60	Hsp17.6	0	25.0133
ICS60	Hsp17.6	0	25.6269
ICS60	Hsp17.6	0	25.9369
ICS60	Hsp17.6	26	20.8245
ICS60	Hsp17.6	26	24.9585
ICS60	Hsp17.6	26	27.0111
ICS60	LDH	23	21.3973
ICS60	LDH	23	22.7938
ICS60	LDH	23	22.8345
ICS60	LDH	0	25.0598
ICS60	LDH	0	25.2279
ICS60	LDH	0	26.3984
ICS60	LDH	26	24.6359
ICS60	LDH	26	25.2162
ICS60	LDH	26	26.6335
ICS60	NTRC	23	21.6907
ICS60	NTRC	23	22.4568
ICS60	NTRC	23	22.7648
ICS60	NTRC	0	23.7612
ICS60	NTRC	0	24.3679
ICS60	NTRC	0	24.8648
ICS60	NTRC	26	23.9775
ICS60	NTRC	26	24.2879
ICS60	NTRC	26	27.5362
ICS60	PDC	23	21.24
ICS60	PDC	23	21.483
ICS60	PDC	23	24.086
ICS60	PDC	0	22.5312
ICS60	PDC	0	23.5622
ICS60	PDC	0	24.3347
ICS60	PDC	26	22.7528
ICS60	PDC	26	23.4077
ICS60	PDC	26	23.826
ICS60	RBOHF	23	21.3071
ICS60	RBOHF	23	21.7285
ICS60	RBOHF	23	22.9766
ICS60	RBOHF	0	25.2032
ICS60	RBOHF	0	25.5551
ICS60	RBOHF	0	25.7429
ICS60	RBOHF	26	24.6421
ICS60	RBOHF	26	25.162
ICS60	RBOHF	26	28.3587
ICS60	SOD	23	20.2447
ICS60	SOD	23	21.2432
ICS60	SOD	0	30.6286
ICS60	SOD	23	22.2968
ICS60	SOD	0	29.5813
ICS60	SOD	0	34.0322
ICS60	SOD	26	22.7709
ICS60	SOD	26	23.9729
ICS60	SOD	26	24.5335
ICS60	UDPGT	23	21.0633
ICS60	UDPGT	23	21.3167
ICS60	UDPGT	23	23.0313
ICS60	UDPGT	0	25.3038
ICS60	UDPGT	0	25.6264
ICS60	UDPGT	0	25.6576
ICS60	UDPGT	26	24.9142
ICS60	UDPGT	26	25.2393
ICS60	UDPGT	26	27.7899
TSH565	ACPB	0	22.533
TSH565	ACPB	0	22.6148
TSH565	ACPB	0	24.9251
TSH565	ACPB	23	22.473
TSH565	ACPB	23	22.5738
TSH565	ACPB	23	24.9111
TSH565	ACPB	26	23.0619
TSH565	ACPB	26	23.1895
TSH565	ACPB	26	23.2358
TSH565	ADH	23	22.1842
TSH565	ADH	23	22.5436
TSH565	ADH	23	25.9663
TSH565	ADH	0	25.5694
TSH565	ADH	0	28.4189
TSH565	ADH	0	28.9195
TSH565	ADH	26	24.0868
TSH565	ADH	26	24.3834
TSH565	ADH	26	24.7432
TSH565	GST	23	18.1186
TSH565	GST	23	18.9965
TSH565	GST	23	23.2318
TSH565	GST	0	19.4166
TSH565	GST	0	23.5723
TSH565	GST	0	25.4632
TSH565	GST	26	20.8237
TSH565	GST	26	21.2909
TSH565	GST	26	21.7393
TSH565	Hsp17.6	23	22.9711
TSH565	Hsp17.6	23	23.3534
TSH565	Hsp17.6	23	23.9678
TSH565	Hsp17.6	0	22.9686
TSH565	Hsp17.6	0	23.4919
TSH565	Hsp17.6	0	25.3145
TSH565	Hsp17.6	26	24.5584
TSH565	Hsp17.6	26	24.888
TSH565	Hsp17.6	26	26.175
TSH565	LDH	23	23.2709
TSH565	LDH	23	23.4503
TSH565	LDH	23	23.6945
TSH565	LDH	0	23.956
TSH565	LDH	0	24.4482
TSH565	LDH	0	25.9362
TSH565	LDH	26	25.1779
TSH565	LDH	26	25.5949
TSH565	LDH	26	27.2849
TSH565	NTRC	23	22.9373
TSH565	NTRC	23	23.0645
TSH565	NTRC	23	23.1947
TSH565	NTRC	0	22.2951
TSH565	NTRC	0	23.5593
TSH565	NTRC	0	24.7025
TSH565	NTRC	26	24.5917
TSH565	NTRC	26	25.0678
TSH565	NTRC	26	25.3903
TSH565	PDC	23	9.93354
TSH565	PDC	23	21.9579
TSH565	PDC	23	22.3057
TSH565	PDC	23	22.6629
TSH565	PDC	0	22.429
TSH565	PDC	0	22.7419
TSH565	PDC	0	24.6315
TSH565	PDC	26	23.6116
TSH565	PDC	26	23.6116
TSH565	PDC	26	23.6116
TSH565	RBOHF	23	21.9968
TSH565	RBOHF	23	22.7851
TSH565	RBOHF	23	23.2812
TSH565	RBOHF	0	23.4523
TSH565	RBOHF	0	24.2574
TSH565	RBOHF	0	25.7615
TSH565	RBOHF	26	25.2989
TSH565	RBOHF	26	25.5919
TSH565	RBOHF	26	27.2372
TSH565	SOD	23	20.6582
TSH565	SOD	23	23.2958
TSH565	SOD	23	33.1112
TSH565	SOD	0	24.0192
TSH565	SOD	0	32.6931
TSH565	SOD	0	35.2683
TSH565	SOD	26	22.6296
TSH565	SOD	26	22.7551
TSH565	SOD	26	23.2058
TSH565	UDPGT	23	22.6737
TSH565	UDPGT	23	22.7623
TSH565	UDPGT	23	23.4802
TSH565	UDPGT	0	23.4063
TSH565	UDPGT	0	24.1684
TSH565	UDPGT	0	25.9559
TSH565	UDPGT	26	25.19
TSH565	UDPGT	26	25.4228
TSH565	UDPGT	26	27.1961

## Sheet: Melting Curves
Temperature	Fluorescence	Derivative	Target Name	Temperature	Fluorescence	Derivative	Target Name	Temperature	Fluorescence	Derivative	Target Name	Temperature	Fluorescence	Derivative	Target Name
72.001	400273	8544.73	LDH	71.999	304810	6827.73	GST	72	383382	8431.94	SOD3.1	71.999	300939	5560.54	ACPB
72.001	374475	8032.8	LDH	71.999	264525	5720.31	GST	72.307	381920	8708.68	SOD3.1	71.999	332883	5422.05	ACPB
72.002	401529	7473.86	LDH	72	289680	7325.15	GST	72.613	379559	9004.01	SOD3.1	71.999	248917	4315.05	ACPB
72.002	416388	8092.48	LDH	72	366763	7601.03	GST	72.92	376374	9314.93	SOD3.1	71.999	348797	6146.12	ACPB
72.002	376918	8962.48	LDH	72	281470	5813.85	GST	73.227	372970	9642.48	SOD3.1	71.999	339518	6383.57	ACPB
72.002	434022	8173.26	LDH	72	372860	7843.97	GST	73.533	369116	9988.48	SOD3.1	71.999	62111.9	1753.86	ACPB
72.002	484105	10572.1	LDH	72	312565	7984.36	GST	73.84	366596	10347.4	SOD3.1	71.999	296642	5315.06	ACPB
72.002	529027	11910.9	LDH	72	372164	8499.5	GST	74.146	363535	10721.8	SOD3.1	71.999	343921	7920.91	ACPB
72.002	351647	8482.35	LDH	72	297850	6670.85	GST	74.453	359694	11190.5	SOD3.1	71.999	332020	7333.55	ACPB
72.002	416533	9246.35	LDH	72	310985	7018.41	GST	74.76	354211	11563.2	SOD3.1	71.999	330164	6580.14	ACPB
72.002	427928	9011.32	LDH	72	298201	6413.62	GST	75.066	351149	11826	SOD3.1	71.999	293712	6871.14	ACPB
72.002	453797	10170.2	LDH	72	371783	8385.08	GST	75.373	346344	11998.6	SOD3.1	71.999	342063	6932.8	ACPB
72.002	374606	8238.15	LDH	72	304563	7509.77	GST	75.679	342804	12118.5	SOD3.1	71.999	273302	6215.23	ACPB
72.002	437278	9654.31	LDH	72	365364	7486.21	GST	75.986	339590	12214.7	SOD3.1	71.999	352579	7010.88	ACPB
72.002	425711	9410.27	LDH	72	313782	6521.07	GST	76.293	335695	12289	SOD3.1	71.999	291267	5766.52	ACPB
72.002	422873	9595.97	LDH	72	361527	7695.05	GST	76.599	331099	12317.4	SOD3.1	71.999	336571	7982.89	ACPB
72.002	433864	9876.47	LDH	72	309897	6205.04	GST	76.906	326481	12268.5	SOD3.1	72	351273	5059	ACPB
72.002	432888	10970.1	LDH	72	419004	10504.4	GST	77.212	323173	12125.8	SOD3.1	72	297348	5011.84	ACPB
72.304	398334	8722.68	LDH	72.306	303754	7010.5	GST	77.519	318761	11899.7	SOD3.1	72.306	300204	5757.1	ACPB
72.304	372236	8220.33	LDH	72.306	262327	5850.88	GST	77.826	314040	11625.1	SOD3.1	72.306	331498	5610.72	ACPB
72.305	399561	7715.9	LDH	72.307	287795	7406.26	GST	78.132	311839	11347.9	SOD3.1	72.306	247739	4455.61	ACPB
72.305	414347	8336.67	LDH	72.307	364743	7752.18	GST	78.439	306922	11109	SOD3.1	72.306	347741	6279.13	ACPB
72.305	374306	9103.77	LDH	72.307	280219	6000	GST	78.745	304002	10933.9	SOD3.1	72.306	338556	6491.84	ACPB
72.305	431295	8477.79	LDH	72.307	371578	8023.71	GST	79.052	300141	10835	SOD3.1	72.306	62181.5	1704.34	ACPB
72.305	483285	10827.8	LDH	72.307	311470	8118.36	GST	79.359	297307	10826.9	SOD3.1	72.306	295433	5452.73	ACPB
72.305	526462	12134	LDH	72.307	369158	8721.19	GST	79.665	291871	10954.5	SOD3.1	72.306	341600	8116.41	ACPB
72.305	349750	8575.71	LDH	72.307	296599	6867.9	GST	79.972	289291	11329	SOD3.1	72.306	329925	7506.51	ACPB
72.305	414356	9414.05	LDH	72.307	308658	7177.01	GST	80.278	286207	12169	SOD3.1	72.306	328108	6603.65	ACPB
72.305	425407	9244.98	LDH	72.307	297307	6565	GST	80.585	281959	13842.2	SOD3.1	72.306	292936	7033.24	ACPB
72.305	451030	10399	LDH	72.307	368624	8524.2	GST	80.892	278572	16890.9	SOD3.1	72.306	342328	7190.71	ACPB
72.305	373139	8412.32	LDH	72.307	304694	7700.66	GST	81.198	274639	22006.3	SOD3.1	72.306	271570	6408.16	ACPB
72.305	435532	9928.08	LDH	72.307	362471	7638.59	GST	81.505	271225	29904.4	SOD3.1	72.306	351869	7268.8	ACPB
72.305	423920	9633.44	LDH	72.307	313037	6702.62	GST	81.811	266205	41069.8	SOD3.1	72.306	290163	5886.86	ACPB
72.305	420425	9729.5	LDH	72.307	360391	7915.11	GST	82.118	259870	55395.9	SOD3.1	72.306	335595	8202.55	ACPB
72.305	432558	10093.1	LDH	72.307	308952	6423.37	GST	82.425	250088	71841.1	SOD3.1	72.307	350923	5290.45	ACPB
72.305	430990	11150	LDH	72.307	416312	10601.3	GST	82.731	232698	88302.6	SOD3.1	72.307	297063	5188.16	ACPB
72.607	396166	8913.6	LDH	72.613	302196	7216.17	GST	83.038	204965	101898	SOD3.1	72.613	297818	5945.3	ACPB
72.607	370295	8422.28	LDH	72.613	260843	5986.83	GST	83.344	161510	109690	SOD3.1	72.613	329116	5827.94	ACPB
72.608	397678	7979.99	LDH	72.614	285298	7500.67	GST	83.651	111110	109639	SOD3.1	72.613	246357	4589.06	ACPB
72.608	412909	8612.48	LDH	72.614	362959	7940.2	GST	83.957	70182.7	101375	SOD3.1	72.613	346716	6446.76	ACPB
72.608	372162	9256.13	LDH	72.614	279252	6196.8	GST	84.264	45227.9	86401.7	SOD3.1	72.613	337547	6652.99	ACPB
72.608	429392	8791.23	LDH	72.614	368984	8234.64	GST	84.571	36749.6	67592.5	SOD3.1	72.613	60686	1656.81	ACPB
72.608	480098	11108.2	LDH	72.614	309988	8285.16	GST	84.877	34894.6	48228	SOD3.1	72.613	294755	5617.31	ACPB
72.608	523416	12394.5	LDH	72.614	367706	8950.57	GST	85.184	34086.4	31018.2	SOD3.1	72.613	339915	8299.72	ACPB
72.608	347563	8694.2	LDH	72.614	293904	7050.1	GST	85.49	33898.8	17514.8	SOD3.1	72.613	328441	7688.06	ACPB
72.608	412002	9591.1	LDH	72.614	307244	7346.12	GST	85.797	34024.6	8906.53	SOD3.1	72.613	325019	6654.31	ACPB
72.608	423018	9502.32	LDH	72.614	295220	6742.08	GST	86.104	33199	4904.16	SOD3.1	72.613	291216	7196.42	ACPB
72.608	448576	10640.6	LDH	72.614	366251	8687.6	GST	86.41	33278.2	2633.12	SOD3.1	72.613	339506	7490.01	ACPB
72.608	371034	8615.57	LDH	72.614	301866	7915.67	GST	86.717	32732.3	1464.1	SOD3.1	72.613	269245	6565.71	ACPB
72.608	432979	10230.8	LDH	72.614	359346	7804.29	GST	87.023	32336.6	907.079	SOD3.1	72.613	349735	7559.28	ACPB
72.608	421011	9889.8	LDH	72.614	311947	6934.84	GST	87.33	32188.4	644.368	SOD3.1	72.613	287941	6023.17	ACPB
72.608	417688	9899.76	LDH	72.614	358442	8164.06	GST	87.637	31800.5	501.075	SOD3.1	72.613	332048	8408.97	ACPB
72.608	429153	10355.5	LDH	72.614	307649	6665.5	GST	87.943	31763.8	396.989	SOD3.1	72.614	348399	5546.72	ACPB
72.608	427519	11362.3	LDH	72.614	412473	10719.7	GST	88.25	31298.7	305.099	SOD3.1	72.614	294658	5366.67	ACPB
72.91	392821	9124.29	LDH	72.92	299647	7434.85	GST	88.556	31609	224.427	SOD3.1	72.92	296655	6117.64	ACPB
72.91	367632	8637.77	LDH	72.92	259172	6136.05	GST	88.863	30902.2	164.469	SOD3.1	72.92	329443	6085.3	ACPB
72.911	394927	8275.81	LDH	72.921	283289	7623.67	GST	89.17	31748	136.002	SOD3.1	72.92	245189	4722.11	ACPB
72.911	409898	8908.05	LDH	72.921	359975	8167.94	GST	89.476	30737.8	144.481	SOD3.1	72.92	344371	6648.86	ACPB
72.911	369379	9407.25	LDH	72.921	276251	6403.93	GST	89.783	31513.9	185.797	SOD3.1	72.92	335078	6920.42	ACPB
72.911	427085	9126.18	LDH	72.921	366114	8487.98	GST	90.089	30735.1	246.231	SOD3.1	72.92	60938.1	1613.58	ACPB
72.911	476266	11397.3	LDH	72.921	306887	8529.16	GST	90.396	30908.6	307.599	SOD3.1	72.92	292487	5831.44	ACPB
72.911	520111	12686.2	LDH	72.921	364878	9179.59	GST	90.703	28849.6	355.175	SOD3.1	72.92	337434	8478.89	ACPB
72.911	344724	8839.07	LDH	72.921	291573	7213.65	GST	91.009	30760.5	383.114	SOD3.1	72.92	326078	7882.89	ACPB
72.911	408708	9785.08	LDH	72.921	305559	7527.68	GST	91.316	30290.8	393.787	SOD3.1	72.92	323095	6737.54	ACPB
72.911	420793	9790.63	LDH	72.921	293737	6940.93	GST	91.622	28941.5	392.364	SOD3.1	72.92	288627	7354.14	ACPB
72.911	444853	10885.9	LDH	72.921	364950	8888.22	GST	91.929	29221	381.881	SOD3.1	72.92	336462	7801.06	ACPB
72.911	368690	8843.25	LDH	72.921	299681	8147.04	GST	92.236	29344.5	362.615	SOD3.1	72.92	266981	6683.24	ACPB
72.911	430377	10546.7	LDH	72.921	358166	8007.34	GST	92.542	28473.9	335.043	SOD3.1	72.92	346478	7858.79	ACPB
72.911	418877	10164.3	LDH	72.921	309991	7197.99	GST	92.849	29036.1	302.62	SOD3.1	72.92	286742	6182.24	ACPB
72.911	416311	10115.6	LDH	72.921	355018	8442.19	GST	93.155	28009.6	271.823	SOD3.1	72.92	331222	8576.12	ACPB
72.911	426768	10647.7	LDH	72.921	304342	6930.17	GST	93.462	28466.1	249.508	SOD3.1	72.921	346798	5838.62	ACPB
72.911	424600	11593.8	LDH	72.921	410792	10870.4	GST	93.769	28669.5	239.485	SOD3.1	72.921	293872	5568.62	ACPB
73.214	393195	8605.14	LDH	73.227	281081	7788.62	GST	94.075	27815.7	240.616	SOD3.1	73.227	293927	6295.99	ACPB
73.214	407105	9204.02	LDH	73.227	358509	8427.25	GST	94.382	27380.5	247.708	SOD3.1	73.227	325935	6432.15	ACPB
73.214	390773	9362.29	LDH	73.227	297506	7654.49	GST	94.688	28020.7	254.604	SOD3.1	73.227	242978	4889.58	ACPB
73.214	366940	9546.86	LDH	73.227	275029	6623.57	GST	72	295228	7891.42	SOD3.1	73.227	341556	6970.12	ACPB
73.214	423685	9496.14	LDH	73.227	363872	8786.11	GST	72.307	293153	8200.61	SOD3.1	73.227	332736	7309.09	ACPB
73.214	365179	8865.17	LDH	73.227	257594	6312.72	GST	72.613	290637	8504.62	SOD3.1	73.227	60464.4	1576.33	ACPB
73.214	472482	11682.7	LDH	73.227	304151	8805.5	GST	72.92	288004	8845.6	SOD3.1	73.227	290183	6125.85	ACPB
73.214	516162	12995.7	LDH	73.227	361588	9458.71	GST	73.227	285199	9273.05	SOD3.1	73.227	335058	8675.92	ACPB
73.214	342732	9006.27	LDH	73.227	290296	7368.02	GST	73.533	281479	9827.91	SOD3.1	73.227	323752	8099.28	ACPB
73.214	405575	10006.1	LDH	73.227	302010	7779.59	GST	73.84	278768	10764.5	SOD3.1	73.227	319893	6850.56	ACPB
73.214	417325	10112.4	LDH	73.227	291038	7152.81	GST	74.146	275482	12070.5	SOD3.1	73.227	286023	7511.26	ACPB
73.214	442128	11127.7	LDH	73.227	362035	9156.71	GST	74.453	271536	13468.4	SOD3.1	73.227	335251	8089.97	ACPB
73.214	365645	9085.6	LDH	73.227	296634	8381.53	GST	74.76	266172	14807.6	SOD3.1	73.227	265111	6778.56	ACPB
73.214	426096	10856.4	LDH	73.227	356080	8280.31	GST	75.066	261792	15916.2	SOD3.1	73.227	345420	8140.3	ACPB
73.214	415186	10434.8	LDH	73.227	306984	7525.76	GST	75.373	255799	16638.2	SOD3.1	73.227	285332	6369.22	ACPB
73.214	412183	10376.1	LDH	73.227	353259	8827.25	GST	75.679	250216	16869.5	SOD3.1	73.227	327741	8694.09	ACPB
73.214	423746	10941.7	LDH	73.227	302713	7212.14	GST	75.986	243386	16581.8	SOD3.1	73.228	345485	6167.08	ACPB
73.214	421286	11827.3	LDH	73.227	407436	11114.9	GST	76.293	238916	15829.6	SOD3.1	73.228	290506	5796.1	ACPB
73.517	390675	8956.58	LDH	73.534	278758	8039.14	GST	76.599	233459	14738.9	SOD3.1	73.534	292043	6490.02	ACPB
73.517	404613	9480.69	LDH	73.534	354540	8697.16	GST	76.906	229160	13481.4	SOD3.1	73.534	323638	6767.79	ACPB
73.517	388073	9628.85	LDH	73.534	294506	7901.39	GST	77.212	224790	12243.7	SOD3.1	73.534	241581	5112.12	ACPB
73.517	362850	9669.53	LDH	73.534	272526	6872.64	GST	77.519	221525	11195.3	SOD3.1	73.534	339352	7304.59	ACPB
73.517	421114	9907.51	LDH	73.534	361649	9199.29	GST	77.826	218466	10461.9	SOD3.1	73.534	329715	7708.54	ACPB
73.517	362650	9101.25	LDH	73.534	255506	6564.31	GST	78.132	215026	10112.8	SOD3.1	73.534	60243.7	1542.84	ACPB
73.517	469451	11958.4	LDH	73.534	301617	9073.06	GST	78.439	212612	10119.4	SOD3.1	73.534	287904	6418.2	ACPB
73.517	511768	13305.7	LDH	73.534	358716	9741.65	GST	78.745	208627	10412.7	SOD3.1	73.534	332318	8914.77	ACPB
73.517	339366	9184.35	LDH	73.534	287009	7578.27	GST	79.052	204999	10861.3	SOD3.1	73.534	321363	8344.2	ACPB
73.517	403415	10258	LDH	73.534	299991	8063.59	GST	79.359	201876	11302.4	SOD3.1	73.534	318025	6976.19	ACPB
73.517	414220	10460.4	LDH	73.534	287913	7409.92	GST	79.665	196215	11589.1	SOD3.1	73.534	284702	7682.04	ACPB
73.517	438059	11358.9	LDH	73.534	358274	9532.73	GST	79.972	192443	11626.6	SOD3.1	73.534	331254	8330.67	ACPB
73.517	362862	9331.44	LDH	73.534	294822	8582.15	GST	80.278	187779	11404.6	SOD3.1	73.534	263774	6880.7	ACPB
73.517	423190	11143.8	LDH	73.534	352922	8690.36	GST	80.585	183300	11012.9	SOD3.1	73.534	341567	8384.43	ACPB
73.517	411840	10678.8	LDH	73.534	303644	7839.64	GST	80.892	179941	10634.8	SOD3.1	73.534	282030	6586.88	ACPB
73.517	408630	10668.3	LDH	73.534	349964	9248.7	GST	81.198	176970	10524.4	SOD3.1	73.534	325052	8775.78	ACPB
73.517	419326	11206.6	LDH	73.534	300547	7519.73	GST	81.505	173643	10978.7	SOD3.1	73.535	342879	6672.81	ACPB
73.517	417288	12045.2	LDH	73.534	403194	11404.3	GST	81.811	171175	12313.8	SOD3.1	73.535	289410	6027.46	ACPB
73.82	388086	9308.58	LDH	73.841	276687	8321.73	GST	82.118	168372	14840.5	SOD3.1	73.841	290684	6711.27	ACPB
73.82	400550	9725.92	LDH	73.841	351863	9013.63	GST	82.425	163276	18816.4	SOD3.1	73.841	321482	7074.54	ACPB
73.82	384867	9913.5	LDH	73.841	292944	8169.36	GST	82.731	159486	24346.5	SOD3.1	73.841	241007	5382.89	ACPB
73.82	360360	9777.75	LDH	73.841	270307	7209	GST	83.038	154252	31234.2	SOD3.1	73.841	336651	7634.82	ACPB
73.82	418487	10352.7	LDH	73.841	357893	9671.11	GST	83.344	147971	38838.1	SOD3.1	73.841	327037	8068.96	ACPB
73.82	359084	9340.86	LDH	73.841	253564	6840.09	GST	83.651	137131	46038.7	SOD3.1	73.841	59407.9	1506.22	ACPB
73.82	464883	12222.1	LDH	73.841	298809	9313.25	GST	83.957	120813	51411.8	SOD3.1	73.841	286205	6684.68	ACPB
73.82	507551	13597.5	LDH	73.841	355688	10019.5	GST	84.264	98650.1	53613.6	SOD3.1	73.841	330999	9204.22	ACPB
73.82	336292	9373.83	LDH	73.841	285321	7836.55	GST	84.571	75198.2	51850.1	SOD3.1	73.841	318684	8616.48	ACPB
73.82	399995	10529.8	LDH	73.841	298152	8369.32	GST	84.877	54884.7	46209.3	SOD3.1	73.841	314826	7085.75	ACPB
73.82	411272	10816.7	LDH	73.841	286533	7691.13	GST	85.184	46275.8	37676.6	SOD3.1	73.841	282699	7879.23	ACPB
73.82	434955	11571.1	LDH	73.841	356091	9921.74	GST	85.49	43975.9	27803.4	SOD3.1	73.841	328941	8511.77	ACPB
73.82	359769	9571.45	LDH	73.841	291900	8746.94	GST	85.797	43736.6	18190.7	SOD3.1	73.841	261337	7012.39	ACPB
73.82	420133	11401.6	LDH	73.841	350690	9128.89	GST	86.104	43522	10065.5	SOD3.1	73.841	339127	8587.28	ACPB
73.82	408330	10882.6	LDH	73.841	300636	8089.01	GST	86.41	43075.5	6216.74	SOD3.1	73.841	280573	6834.25	ACPB
73.82	406290	10969.3	LDH	73.841	347739	9656.02	GST	86.717	42597.6	3624.11	SOD3.1	73.841	323334	8853.23	ACPB
73.82	416082	11417.1	LDH	73.841	298090	7882.39	GST	87.023	42398.2	2055.77	SOD3.1	73.842	340726	7177.35	ACPB
73.82	412858	12240.1	LDH	73.841	400367	11717	GST	87.33	42851.9	1203.68	SOD3.1	73.842	287612	6273.83	ACPB
74.123	383732	9639.4	LDH	74.148	273658	8589.15	GST	87.637	42065.2	786.102	SOD3.1	74.148	288212	6973.71	ACPB
74.123	397552	9939.48	LDH	74.148	349026	9299.76	GST	87.943	41739	592.608	SOD3.1	74.148	318206	7350.56	ACPB
74.123	381732	10194.2	LDH	74.148	289204	8411.18	GST	88.25	40925.2	489.936	SOD3.1	74.148	238585	5695.44	ACPB
74.123	357205	9885.01	LDH	74.148	268147	7562.76	GST	88.556	40980.3	410.23	SOD3.1	74.148	333481	7945.05	ACPB
74.123	415195	10810.3	LDH	74.148	354944	10095	GST	88.863	40741.7	333.278	SOD3.1	74.148	324437	8351.61	ACPB
74.123	356215	9577.57	LDH	74.148	250676	7125.5	GST	89.17	41022.2	265.956	SOD3.1	74.148	59303.7	1457.94	ACPB
74.123	462008	12467.8	LDH	74.148	295835	9515.04	GST	89.476	40682.8	221.859	SOD3.1	74.148	283796	6904.86	ACPB
74.123	503542	13855.4	LDH	74.148	352895	10289.4	GST	89.783	40970.1	206.565	SOD3.1	74.148	328313	9527.75	ACPB
74.123	333967	9547.71	LDH	74.148	282788	8139.91	GST	90.089	40227.1	213.603	SOD3.1	74.148	317023	8902.79	ACPB
74.123	396950	10797.4	LDH	74.148	295169	8678.77	GST	90.396	39840	230.582	SOD3.1	74.148	311160	7154.26	ACPB
74.123	407653	11155.9	LDH	74.148	283441	7951.84	GST	90.703	39521.2	248.569	SOD3.1	74.148	280108	8102.02	ACPB
74.123	431166	11756.4	LDH	74.148	352874	10280.4	GST	91.009	39808.2	266.663	SOD3.1	74.148	326045	8636.7	ACPB
74.123	356506	9798.96	LDH	74.148	288916	8885.56	GST	91.316	40229.7	288.673	SOD3.1	74.148	260054	7177.97	ACPB
74.123	415133	11632.5	LDH	74.148	346894	9538.91	GST	91.622	38751.4	316.28	SOD3.1	74.148	336724	8761.42	ACPB
74.123	404732	11045.1	LDH	74.148	298533	8282.23	GST	91.929	39209.7	345.593	SOD3.1	74.148	278401	7104.1	ACPB
74.123	401984	11251.2	LDH	74.148	343531	10028.4	GST	92.236	38210.3	369.842	SOD3.1	74.148	320193	8963.25	ACPB
74.123	412086	11562.6	LDH	74.148	295862	8203.36	GST	92.542	38594.9	384.634	SOD3.1	74.149	337870	7638.85	ACPB
74.123	409644	12421.6	LDH	74.148	396292	12021.3	GST	92.849	38499.5	390.443	SOD3.1	74.149	285046	6542.42	ACPB
74.426	381082	9936.49	LDH	74.455	270325	8797.39	GST	93.155	37685.8	390.695	SOD3.1	74.454	286267	7271.86	ACPB
74.426	394498	10129.7	LDH	74.455	345537	9490.12	GST	93.462	37774.6	388.582	SOD3.1	74.454	316690	7607.43	ACPB
74.426	378332	10503.8	LDH	74.455	288227	8624.04	GST	93.769	37486.4	385.856	SOD3.1	74.454	236662	6024.82	ACPB
74.426	354613	9984.17	LDH	74.455	266359	7913.67	GST	94.075	36791.7	384.05	SOD3.1	74.454	332020	8217.49	ACPB
74.426	410652	11250.5	LDH	74.455	351135	10429.9	GST	94.382	37582	385.577	SOD3.1	74.454	321028	8538.9	ACPB
74.426	353674	9803.82	LDH	74.455	248737	7399.55	GST	94.688	36730.4	393.066	SOD3.1	74.454	58556	1392.82	ACPB
74.426	458377	12684.4	LDH	74.455	293488	9677.81	GST	72	360689	7968.29	SOD3.1	74.454	281157	7069.86	ACPB
74.426	498921	14081.9	LDH	74.455	350386	10544.7	GST	72.306	357853	8211.16	SOD3.1	74.454	325373	9847.99	ACPB
74.426	330320	9682.32	LDH	74.455	281265	8474.21	GST	72.613	356597	8453.56	SOD3.1	74.454	313862	9180.01	ACPB
74.426	392727	11033.3	LDH	74.455	292438	8961.55	GST	72.92	353282	8671.72	SOD3.1	74.454	307853	7174.03	ACPB
74.426	403475	11453	LDH	74.455	281419	8185.31	GST	73.226	350335	8850.68	SOD3.1	74.454	277754	8330.23	ACPB
74.426	427492	11912.4	LDH	74.455	349162	10568.8	GST	73.533	347035	8990.82	SOD3.1	74.454	323742	8720.5	ACPB
74.426	353980	10026.4	LDH	74.455	286551	9013.48	GST	73.84	344494	9106.12	SOD3.1	74.454	256839	7364.04	ACPB
74.426	412529	11845.4	LDH	74.455	343769	9871.98	GST	74.146	341029	9216.82	SOD3.1	74.454	332950	8926.74	ACPB
74.426	401202	11177.6	LDH	74.455	295497	8442.82	GST	74.453	338944	9351.08	SOD3.1	74.454	276258	7378.6	ACPB
74.426	398330	11517.3	LDH	74.455	341015	10357.5	GST	74.76	335616	9543.74	SOD3.1	74.454	318519	9129.84	ACPB
74.426	408488	11649.6	LDH	74.455	292123	8464.09	GST	75.067	332197	9767.79	SOD3.1	74.456	335664	8034.1	ACPB
74.426	405921	12563.2	LDH	74.455	392522	12285.6	GST	75.373	328958	10010.5	SOD3.1	74.456	283957	6830.96	ACPB
74.729	378209	10216.9	LDH	74.761	267731	8920.61	GST	75.68	326434	10244.7	SOD3.1	74.761	284509	7579.81	ACPB
74.729	391537	10319	LDH	74.761	341546	9583.57	GST	75.987	323012	10432.5	SOD3.1	74.761	314028	7857.31	ACPB
74.729	375227	10760.1	LDH	74.761	263438	8231.81	GST	76.293	320080	10535	SOD3.1	74.761	234612	6334.38	ACPB
74.729	350396	10080.2	LDH	74.761	347293	10661	GST	76.6	315036	10529	SOD3.1	74.761	328850	8432.3	ACPB
74.729	407712	11671.7	LDH	74.761	289124	9809.04	GST	76.907	311948	10421	SOD3.1	74.761	318345	8636.52	ACPB
74.729	349981	10009.8	LDH	74.761	345194	10777.8	GST	77.213	309502	10247.7	SOD3.1	74.761	58067.1	1312.13	ACPB
74.729	452931	12878.5	LDH	74.761	277903	8809.15	GST	77.52	305786	10062.1	SOD3.1	74.761	278990	7189.81	ACPB
74.729	494376	14285.2	LDH	74.761	289642	9185.41	GST	77.827	302368	9911.73	SOD3.1	74.761	322277	10123.8	ACPB
74.729	326551	9774.87	LDH	74.761	277700	8388.44	GST	78.133	300415	9818.36	SOD3.1	74.761	310765	9421.92	ACPB
74.729	389139	11240	LDH	74.761	345105	10762.5	GST	78.44	296767	9771.43	SOD3.1	74.761	304682	7155.84	ACPB
74.729	400081	11706.7	LDH	74.761	284011	9145.1	GST	78.747	293843	9736.02	SOD3.1	74.761	275828	8529.9	ACPB
74.729	422330	12071.5	LDH	74.761	340126	10110.1	GST	79.053	290645	9674.8	SOD3.1	74.761	321598	8784.84	ACPB
74.729	350143	10252	LDH	74.761	293157	8592.18	GST	79.36	286677	9572.06	SOD3.1	74.761	255123	7548.68	ACPB
74.729	408506	12084.8	LDH	74.761	336558	10648.2	GST	79.667	283304	9451.36	SOD3.1	74.761	331766	9096.74	ACPB
74.729	397347	11312.5	LDH	74.761	289557	8663.86	GST	79.973	281478	9381.1	SOD3.1	74.761	273996	7628.39	ACPB
74.729	394614	11719.5	LDH	74.761	388244	12485.5	GST	80.28	278058	9474.66	SOD3.1	74.761	315879	9351.92	ACPB
74.729	404881	11702.4	LDH	74.762	283790	8806.72	GST	80.587	275806	9897.98	SOD3.1	74.762	331596	8367.46	ACPB
74.729	401342	12666.5	LDH	74.762	247044	7638.67	GST	80.894	272479	10892.3	SOD3.1	74.762	280040	7125.29	ACPB
75.032	374856	10525.8	LDH	75.068	263897	8961.91	GST	81.2	269357	12806.6	SOD3.1	75.068	281956	7859.88	ACPB
75.032	388347	10535.5	LDH	75.068	338061	9604.5	GST	81.507	267508	16114.5	SOD3.1	75.068	311551	8100.29	ACPB
75.032	348000	10174.4	LDH	75.068	260232	8487.1	GST	81.814	263278	21376.5	SOD3.1	75.068	233802	6587.35	ACPB
75.032	403822	12068.7	LDH	75.068	343800	10803.4	GST	82.12	259570	29107.9	SOD3.1	75.068	325482	8573.83	ACPB
75.032	448919	13036.2	LDH	75.068	286303	9917.91	GST	82.427	254836	39537.2	SOD3.1	75.068	315142	8667.16	ACPB
75.032	490101	14434.3	LDH	75.068	342683	10984.3	GST	82.734	247884	52309.2	SOD3.1	75.068	57638	1222.74	ACPB
75.032	324201	9828.69	LDH	75.068	274540	9112.28	GST	83.04	237552	66257.4	SOD3.1	75.068	275703	7292.75	ACPB
75.032	385246	11391.7	LDH	75.068	286389	9331.13	GST	83.347	218509	79419.3	SOD3.1	75.068	319557	10327.9	ACPB
75.032	395735	11925.3	LDH	75.068	274471	8558.51	GST	83.654	186198	89400.1	SOD3.1	75.068	308371	9608.39	ACPB
75.032	420026	12234.2	LDH	75.068	342316	10861.3	GST	83.96	145928	94035	SOD3.1	75.068	303409	7115.35	ACPB
75.032	347475	10428.6	LDH	75.068	281165	9287.34	GST	84.267	106992	92107.3	SOD3.1	75.068	273350	8667.75	ACPB
75.032	405014	12320.9	LDH	75.068	336038	10269.8	GST	84.574	78033.7	83802.8	SOD3.1	75.068	316446	8853.76	ACPB
75.032	394995	11447.3	LDH	75.068	290079	8738.95	GST	84.88	57674.2	70673.7	SOD3.1	75.068	253148	7712.64	ACPB
75.032	391447	11829.7	LDH	75.068	333698	10908.9	GST	85.187	49997.7	55120.1	SOD3.1	75.068	328924	9268.94	ACPB
75.032	400898	11735.8	LDH	75.068	286434	8821.84	GST	85.494	48719	39630.2	SOD3.1	75.068	271964	7819.53	ACPB
75.032	397561	12734.2	LDH	75.068	384040	12608.2	GST	85.8	47594	26110.9	SOD3.1	75.068	313311	9602.31	ACPB
75.033	371215	10941.4	LDH	75.069	282151	8961.16	GST	86.107	46784.9	15552.2	SOD3.1	75.069	329530	8664.9	ACPB
75.033	346873	10226.2	LDH	75.069	244061	7823.08	GST	86.414	45972.4	8363.04	SOD3.1	75.069	279342	7402.05	ACPB
75.335	372147	10788.8	LDH	75.375	261630	8949.73	GST	86.72	45607.8	4649.39	SOD3.1	75.375	278692	8077.51	ACPB
75.335	384490	10730.1	LDH	75.375	335523	9593.37	GST	87.027	46084.8	2430.65	SOD3.1	75.375	308743	8320.47	ACPB
75.335	344526	10262.9	LDH	75.375	256955	8659.46	GST	87.334	45724.1	1216.03	SOD3.1	75.375	229804	6759.12	ACPB
75.335	399950	12368.2	LDH	75.375	339966	10890.2	GST	87.641	46211.9	627.186	SOD3.1	75.375	322514	8640.37	ACPB
75.335	445723	13146.3	LDH	75.375	284316	10006.1	GST	87.947	45660.9	403.057	SOD3.1	75.375	312272	8659.99	ACPB
75.335	484236	14542.6	LDH	75.375	339042	11162.2	GST	88.254	45170.5	370.675	SOD3.1	75.375	57687.7	1133.77	ACPB
75.335	321063	9847.04	LDH	75.375	271938	9360.96	GST	88.561	44608.2	416.335	SOD3.1	75.375	273837	7411.17	ACPB
75.335	381957	11493.3	LDH	75.375	282601	9402.59	GST	88.867	44354.3	468.168	SOD3.1	75.375	316182	10454.8	ACPB
75.335	392574	12077	LDH	75.375	273496	8690.14	GST	89.174	44355.2	486.683	SOD3.1	75.375	305323	9729.58	ACPB
75.335	415641	12401.6	LDH	75.375	338369	10887.4	GST	89.481	43525.4	457.707	SOD3.1	75.375	299644	7057.42	ACPB
75.335	343833	10544.7	LDH	75.375	277461	9436.47	GST	89.787	43209.9	385.931	SOD3.1	75.375	270260	8727.67	ACPB
75.335	401229	12539.3	LDH	75.375	332831	10386.6	GST	90.094	43010.4	288.89	SOD3.1	75.375	316015	8946.66	ACPB
75.335	390373	11578.7	LDH	75.375	286367	8879.91	GST	90.401	43398.3	191.188	SOD3.1	75.375	250274	7844.87	ACPB
75.335	386076	11852.3	LDH	75.375	331098	11139.1	GST	90.707	42701.2	117.46	SOD3.1	75.375	325473	9426.16	ACPB
75.335	397631	11779.9	LDH	75.375	284075	8967.24	GST	91.014	43034	84.72	SOD3.1	75.375	268800	7925.58	ACPB
75.335	394189	12770.6	LDH	75.375	380501	12652.9	GST	91.321	42993.9	96.617	SOD3.1	75.375	311443	9840.24	ACPB
75.336	367689	11057.5	LDH	75.376	278058	9092.36	GST	91.627	42254.3	142.403	SOD3.1	75.376	327012	8952.7	ACPB
75.336	343745	10390.6	LDH	75.376	240530	7944.51	GST	91.934	42386.8	201.525	SOD3.1	75.376	276700	7633.73	ACPB
75.638	367728	10996	LDH	75.682	258372	8922.69	GST	92.241	41579.4	251.587	SOD3.1	75.682	276724	8213.75	ACPB
75.638	381513	10893.1	LDH	75.682	332449	9592.5	GST	92.547	41354	275.673	SOD3.1	75.682	306538	8492.99	ACPB
75.638	341516	10337.4	LDH	75.682	255626	8745.14	GST	92.854	41829.9	266.272	SOD3.1	75.682	228449	6845.62	ACPB
75.638	395351	12571.8	LDH	75.682	337028	10954.8	GST	93.161	40460.5	225.439	SOD3.1	75.682	319514	8648.12	ACPB
75.638	440753	13229.6	LDH	75.682	280990	10064.2	GST	93.468	41108.3	162.941	SOD3.1	75.682	310100	8638.98	ACPB
75.638	481613	14626.8	LDH	75.682	336055	11309.8	GST	93.774	40356.9	93.591	SOD3.1	75.682	57625.1	1053.8	ACPB
75.638	318485	9830.57	LDH	75.682	269082	9545.9	GST	94.081	40685	33.564	SOD3.1	75.682	271961	7560.73	ACPB
75.638	379246	11555	LDH	75.682	280049	9424.75	GST	94.388	41046.3	-4.612	SOD3.1	75.682	314042	10515.6	ACPB
75.638	388048	12184.5	LDH	75.682	269304	8775.24	GST	94.694	40294.7	-16.667	SOD3.1	75.682	302473	9786.26	ACPB
75.638	411939	12577	LDH	75.682	334532	10878	GST	72	403971	8221.24	RBOHF	75.682	296832	6971.71	ACPB
75.638	340050	10597.9	LDH	75.682	276028	9578.14	GST	72.306	402086	8483.32	RBOHF	75.682	267005	8719.24	ACPB
75.638	396610	12727.1	LDH	75.682	330927	10491.5	GST	72.612	399086	8735.34	RBOHF	75.682	312749	9069.85	ACPB
75.638	386885	11698.6	LDH	75.682	283393	9006.97	GST	72.919	396609	8971.84	RBOHF	75.682	248100	7942.74	ACPB
75.638	383400	11809.5	LDH	75.682	327045	11325.1	GST	73.225	394127	9217.19	RBOHF	75.682	322328	9547.51	ACPB
75.638	393506	11857.7	LDH	75.682	280864	9124.33	GST	73.531	390928	9522.81	RBOHF	75.682	265508	7938.35	ACPB
75.638	389232	12785	LDH	75.682	375749	12629.6	GST	73.838	387874	9860.74	RBOHF	75.682	306714	10029	ACPB
75.639	364490	11129.5	LDH	75.683	276367	9205.58	GST	74.144	385091	10237.7	RBOHF	75.683	324705	9235.49	ACPB
75.639	340220	10488.4	LDH	75.683	238561	8010.87	GST	74.45	382784	10638.2	RBOHF	75.683	273242	7796.86	ACPB
75.941	364967	11137.8	LDH	75.989	255975	8912.23	GST	74.756	378779	11028.6	RBOHF	75.989	274352	8271.77	ACPB
75.941	376755	11019.1	LDH	75.989	328348	9633.15	GST	75.063	375280	11370.2	RBOHF	75.989	303210	8597.65	ACPB
75.941	338163	10387.9	LDH	75.989	251844	8757.6	GST	75.369	371651	11635.4	RBOHF	75.989	225909	6864.64	ACPB
75.941	391884	12694.1	LDH	75.989	333674	11016.8	GST	75.675	368305	11816.9	RBOHF	75.989	316596	8625.86	ACPB
75.941	436523	13308.8	LDH	75.989	276968	10079.2	GST	75.982	364443	11927.7	RBOHF	75.989	306766	8615.98	ACPB
75.941	475839	14700	LDH	75.989	331888	11424.9	GST	76.288	361131	11991.5	RBOHF	75.989	56554.9	990.256	ACPB
75.941	314396	9782.25	LDH	75.989	265946	9667.4	GST	76.594	357616	12031.9	RBOHF	75.989	270118	7726.45	ACPB
75.941	374195	11579.8	LDH	75.989	277432	9429.33	GST	76.901	353953	12065.4	RBOHF	75.989	310878	10526.7	ACPB
75.941	384120	12272.9	LDH	75.989	266618	8809.57	GST	77.207	351057	12102.1	RBOHF	75.989	299801	9787.39	ACPB
75.941	408245	12745.8	LDH	75.989	331081	10871.7	GST	77.513	346652	12154	RBOHF	75.989	293486	6844.64	ACPB
75.941	336406	10598	LDH	75.989	272024	9693.28	GST	77.819	343228	12246.9	RBOHF	75.989	265888	8674.11	ACPB
75.941	392775	12871.8	LDH	75.989	326321	10595.3	GST	78.126	339659	12433	RBOHF	75.989	310003	9211.31	ACPB
75.941	383535	11796.3	LDH	75.989	281592	9114.48	GST	78.432	336604	12804.4	RBOHF	75.989	246073	8008.65	ACPB
75.941	379252	11735.7	LDH	75.989	322711	11447.5	GST	78.738	332593	13515	RBOHF	75.989	319760	9621.1	ACPB
75.941	390123	11979.9	LDH	75.989	278486	9301.04	GST	79.045	329100	14811.2	RBOHF	75.989	263846	7869.62	ACPB
75.941	385388	12793.6	LDH	75.989	371214	12557.6	GST	79.351	325928	17067.6	RBOHF	75.989	304612	10149.5	ACPB
75.942	361216	11177.7	LDH	75.99	273182	9302.66	GST	79.657	320744	20800.2	RBOHF	75.99	322128	9488.34	ACPB
75.942	336403	10521.1	LDH	75.99	235940	8042.91	GST	79.963	317561	26618.8	RBOHF	75.99	271543	7880.25	ACPB
76.244	361402	11216	LDH	76.296	252937	8931.34	GST	80.27	313145	35084.2	RBOHF	76.296	271199	8275.2	ACPB
76.244	374960	11108.4	LDH	76.296	325278	9727.27	GST	80.576	307564	46463.7	RBOHF	76.296	299238	8629.34	ACPB
76.244	334502	10408.1	LDH	76.296	248694	8723.31	GST	80.882	300346	60443.7	RBOHF	76.296	224396	6848.94	ACPB
76.244	387720	12756.3	LDH	76.296	329120	11079.3	GST	81.189	287901	75913.7	RBOHF	76.296	315002	8603.34	ACPB
76.244	433631	13397.7	LDH	76.296	274109	10047.1	GST	81.495	268966	90967.1	RBOHF	76.296	304001	8592.9	ACPB
76.244	472019	14768.9	LDH	76.296	328008	11508.1	GST	81.801	238173	103207	RBOHF	76.296	56269.9	949.707	ACPB
76.244	310767	9714.19	LDH	76.296	263727	9731.45	GST	82.108	197325	110325	RBOHF	76.296	267566	7870.25	ACPB
76.244	371204	11564.1	LDH	76.296	274271	9438.27	GST	82.414	152507	110764	RBOHF	76.296	308072	10501.2	ACPB
76.244	380985	12360.4	LDH	76.296	262931	8801.13	GST	82.72	115567	104213	RBOHF	76.296	296584	9747.52	ACPB
76.244	403733	12880.3	LDH	76.296	328786	10895.3	GST	83.026	84540.8	91722.5	RBOHF	76.296	290398	6676.32	ACPB
76.244	333911	10561.9	LDH	76.296	269613	9768.27	GST	83.333	64635.3	75389.5	RBOHF	76.296	262792	8630.33	ACPB
76.244	389145	12963.6	LDH	76.296	323276	10691.4	GST	83.639	55318.9	57745.3	RBOHF	76.296	307156	9343.77	ACPB
76.244	378790	11864.8	LDH	76.296	276722	9203.2	GST	83.945	52506.9	41093.1	RBOHF	76.296	243477	8045.6	ACPB
76.244	376008	11668	LDH	76.296	318809	11495.1	GST	84.252	51068.9	27027.7	RBOHF	76.296	316791	9650.33	ACPB
76.244	387130	12142.5	LDH	76.296	274923	9487.94	GST	84.558	50458.3	16261.3	RBOHF	76.296	261723	7745.41	ACPB
76.244	382190	12816	LDH	76.296	368460	12464.7	GST	84.864	49726.1	8828.6	RBOHF	76.296	301973	10203.1	ACPB
76.245	358208	11213	LDH	76.297	270008	9380.43	GST	85.171	49919.5	5093.55	RBOHF	76.297	317144	9669.7	ACPB
76.245	333265	10503.8	LDH	76.297	233837	8063.52	GST	85.477	49126.2	2884.58	RBOHF	76.297	268433	7890.71	ACPB
76.547	356989	11249.2	LDH	76.602	250115	8974.43	GST	85.783	48938.4	1673.82	RBOHF	76.603	268877	8260.62	ACPB
76.547	370570	11163.3	LDH	76.602	322715	9866.01	GST	86.089	48783.3	1055.61	RBOHF	76.603	297700	8599.1	ACPB
76.547	331427	10398.7	LDH	76.602	245896	8674.14	GST	86.396	48310.9	761.511	RBOHF	76.603	221278	6833.53	ACPB
76.547	383860	12778.6	LDH	76.602	325996	11136.5	GST	86.702	48229.7	633.984	RBOHF	76.603	311117	8600.81	ACPB
76.547	428617	13496.2	LDH	76.602	269712	9982.78	GST	87.008	48402.3	588.308	RBOHF	76.603	300625	8568.89	ACPB
76.547	466830	14834.4	LDH	76.602	324421	11565.5	GST	87.315	47567	580.799	RBOHF	76.603	56825.5	936.517	ACPB
76.547	308624	9648.76	LDH	76.602	259088	9749.82	GST	87.621	47249.6	589.634	RBOHF	76.603	263083	7955.49	ACPB
76.547	367497	11505.2	LDH	76.602	271858	9454.09	GST	87.927	47250.7	606.074	RBOHF	76.603	304624	10447.8	ACPB
76.547	377089	12452.6	LDH	76.602	259976	8772.55	GST	88.233	47051.2	630.27	RBOHF	76.603	293987	9685.3	ACPB
76.547	399874	12954.4	LDH	76.602	324407	10957.5	GST	88.54	46774.4	666.83	RBOHF	76.603	287352	6489.18	ACPB
76.547	330851	10506.8	LDH	76.602	265595	9804.2	GST	88.846	45996.5	718.438	RBOHF	76.603	260738	8614.82	ACPB
76.547	384877	12995.8	LDH	76.602	319023	10771	GST	89.152	46729.8	779.603	RBOHF	76.603	303492	9435.98	ACPB
76.547	376099	11901.5	LDH	76.602	274532	9281.22	GST	89.459	45839.3	833.795	RBOHF	76.603	240680	8054.7	ACPB
76.547	371918	11634	LDH	76.602	315346	11476.3	GST	89.765	44982.7	856.984	RBOHF	76.603	313627	9651.07	ACPB
76.547	382268	12327.8	LDH	76.602	272482	9666.92	GST	90.071	44813.5	827.449	RBOHF	76.603	259137	7599.22	ACPB
76.547	377280	12865.8	LDH	76.602	363775	12383.9	GST	90.378	44427.4	737.852	RBOHF	76.603	299080	10204.5	ACPB
76.549	354326	11237.8	LDH	76.604	267183	9432.94	GST	90.684	43641	602.444	RBOHF	76.604	315141	9746.97	ACPB
76.549	330315	10460.9	LDH	76.604	230555	8086.45	GST	90.99	44113.2	454.124	RBOHF	76.604	265909	7852.22	ACPB
76.85	354314	11265.5	LDH	76.909	247654	9025.11	GST	91.296	44683.9	331.52	RBOHF	76.909	266665	8266.9	ACPB
76.85	367111	11184.1	LDH	76.909	319272	10024.9	GST	91.603	44156.6	263.247	RBOHF	76.909	294836	8528.29	ACPB
76.85	327912	10367.5	LDH	76.909	244304	8638.39	GST	91.909	43889.7	258.128	RBOHF	76.909	220158	6841.69	ACPB
76.85	380050	12772	LDH	76.909	322459	11184.9	GST	92.215	43364.7	305.931	RBOHF	76.909	307630	8625.14	ACPB
76.85	424291	13592.4	LDH	76.909	268745	9916.37	GST	92.522	44015.1	385.371	RBOHF	76.909	298318	8548.41	ACPB
76.85	462437	14894.3	LDH	76.909	321024	11610.1	GST	92.828	43267.1	473.06	RBOHF	76.909	56083.9	950.351	ACPB
76.85	305682	9609.13	LDH	76.909	257341	9742.84	GST	93.134	42570.3	548.931	RBOHF	76.909	260719	7970.88	ACPB
76.85	363541	11408.9	LDH	76.909	268128	9465.48	GST	93.44	43017.6	598.579	RBOHF	76.909	302194	10374.9	ACPB
76.85	372745	12542.9	LDH	76.909	258331	8753.48	GST	93.747	41878.4	614.61	RBOHF	76.909	290616	9621.59	ACPB
76.85	395470	12956.9	LDH	76.909	321227	11051.5	GST	94.053	42214.4	597.87	RBOHF	76.909	285059	6322.4	ACPB
76.85	326891	10445.9	LDH	76.909	262373	9818.85	GST	94.359	41365.5	557.196	RBOHF	76.909	258235	8634.04	ACPB
76.85	380992	12965.6	LDH	76.909	315177	10837.3	GST	94.666	41923.6	506.532	RBOHF	76.909	300652	9468.04	ACPB
76.85	371761	11904.7	LDH	76.909	271212	9362.21	GST	72	391192	7549.97	RBOHF	76.909	238821	8035.57	ACPB
76.85	368864	11641.7	LDH	76.909	312866	11420.4	GST	72.306	389356	7793.31	RBOHF	76.909	310203	9645.54	ACPB
76.85	378565	12509.3	LDH	76.909	268236	9822.63	GST	72.612	386322	8055.96	RBOHF	76.909	256082	7469.3	ACPB
76.85	374300	12941.1	LDH	76.909	359159	12349.1	GST	72.919	384905	8327.81	RBOHF	76.909	296025	10173.4	ACPB
76.852	350305	11252.3	LDH	76.911	264237	9456.31	GST	73.225	381618	8607.51	RBOHF	76.911	311406	9716.63	ACPB
76.852	326705	10417.3	LDH	76.911	228953	8111.2	GST	73.531	379060	8940.85	RBOHF	76.911	263183	7798.1	ACPB
77.153	351260	11287.1	LDH	77.216	242600	9067.3	GST	73.838	375944	9231.17	RBOHF	77.216	264205	8324.44	ACPB
77.153	363844	11168.2	LDH	77.216	315380	10177.6	GST	74.144	372250	9475.79	RBOHF	77.216	291681	8442.55	ACPB
77.153	325123	10325.4	LDH	77.216	241879	8634.58	GST	74.45	369455	9686.85	RBOHF	77.216	218012	6877.44	ACPB
77.153	376429	12737	LDH	77.216	318972	11232.5	GST	74.756	366065	9885.1	RBOHF	77.216	305994	8671.83	ACPB
77.153	420275	13667.8	LDH	77.216	264702	9882.24	GST	75.063	363927	10087.8	RBOHF	77.216	294441	8544.17	ACPB
77.153	457337	14944.8	LDH	77.216	317890	11658.8	GST	75.369	360267	10299.6	RBOHF	77.216	56238.5	984.766	ACPB
77.153	302721	9606.18	LDH	77.216	253868	9739.3	GST	75.675	356901	10510.6	RBOHF	77.216	258349	7936.29	ACPB
77.153	360107	11293.3	LDH	77.216	265662	9463.77	GST	75.982	353407	10702.9	RBOHF	77.216	299174	10298.3	ACPB
77.153	368852	12616.6	LDH	77.216	255119	8768.7	GST	76.288	350377	10859.4	RBOHF	77.216	288409	9577.05	ACPB
77.153	391132	12898.7	LDH	77.216	317803	11168.6	GST	76.594	346947	10970.4	RBOHF	77.216	281937	6218.3	ACPB
77.153	323816	10389.1	LDH	77.216	260506	9838.96	GST	76.901	343010	11037.8	RBOHF	77.216	256070	8678.01	ACPB
77.153	376480	12875.4	LDH	77.216	312710	10909.3	GST	77.207	339786	11076.3	RBOHF	77.216	298026	9443.55	ACPB
77.153	368709	11871.7	LDH	77.216	267735	9460.2	GST	77.513	336859	11115.5	RBOHF	77.216	236610	7991.62	ACPB
77.153	365650	11677.6	LDH	77.216	307480	11371.6	GST	77.819	332204	11200.5	RBOHF	77.216	308630	9656.2	ACPB
77.153	375107	12658.4	LDH	77.216	265850	9950.15	GST	78.126	330225	11396.1	RBOHF	77.216	254196	7397.59	ACPB
77.153	370149	13022.1	LDH	77.216	356150	12387.8	GST	78.432	326174	11795.8	RBOHF	77.216	292960	10130.3	ACPB
77.155	347184	11259.7	LDH	77.218	261113	9453.32	GST	78.738	322828	12543.8	RBOHF	77.218	307868	9608.5	ACPB
77.155	323578	10389.5	LDH	77.218	225966	8127.67	GST	79.045	319542	13869.1	RBOHF	77.218	262008	7760.1	ACPB
77.456	348441	11318.4	LDH	77.523	242273	9094.89	GST	79.351	316304	16123.3	RBOHF	77.523	261587	8446.3	ACPB
77.456	360256	11114.2	LDH	77.523	311864	10312.2	GST	79.657	310987	19797.9	RBOHF	77.523	288880	8370.88	ACPB
77.456	321535	10281.6	LDH	77.523	237766	8671.14	GST	79.963	308306	25479.5	RBOHF	77.523	215652	6928.97	ACPB
77.456	371657	12668	LDH	77.523	313826	11298.8	GST	80.27	303296	33710.3	RBOHF	77.523	302820	8732.09	ACPB
77.456	416007	13704.6	LDH	77.523	262066	9908.82	GST	80.576	298476	44749.8	RBOHF	77.523	292507	8574.75	ACPB
77.456	453726	14978.6	LDH	77.523	313816	11731.7	GST	80.882	291172	58294	RBOHF	77.523	55271.1	1028.73	ACPB
77.456	299774	9630.89	LDH	77.523	251074	9770.55	GST	81.189	279744	73266.9	RBOHF	77.523	256198	7889	ACPB
77.456	356199	11184	LDH	77.523	261861	9459.38	GST	81.495	260055	87822.4	RBOHF	77.523	295837	10248.4	ACPB
77.456	364693	12658.7	LDH	77.523	252355	8832.23	GST	81.801	230825	99640.9	RBOHF	77.523	285306	9573.45	ACPB
77.456	387390	12807	LDH	77.523	313704	11311.1	GST	82.108	192917	106486	RBOHF	77.523	279790	6215.34	ACPB
77.456	320041	10346.3	LDH	77.523	257965	9889.4	GST	82.414	148860	106849	RBOHF	77.523	252635	8736.89	ACPB
77.456	372370	12736.6	LDH	77.523	308761	11015.1	GST	82.72	112805	100428	RBOHF	77.523	294184	9397.79	ACPB
77.456	364121	11799.4	LDH	77.523	265623	9584.22	GST	83.026	82997.3	88246.5	RBOHF	77.523	233132	7939.96	ACPB
77.456	360749	11714.5	LDH	77.523	304768	11379.4	GST	83.333	64767.6	72346.1	RBOHF	77.523	304357	9709.42	ACPB
77.456	370746	12751.3	LDH	77.523	262412	10054.8	GST	83.639	55672.2	55191.2	RBOHF	77.523	251310	7424.29	ACPB
77.456	366214	13078.4	LDH	77.523	352960	12515.7	GST	83.945	53075	39022.6	RBOHF	77.523	289482	10099.5	ACPB
77.458	344014	11264	LDH	77.525	258678	9436.08	GST	84.252	50568.9	25389.6	RBOHF	77.524	304943	9472.27	ACPB
77.458	320781	10380.5	LDH	77.525	222700	8127.52	GST	84.558	51459.3	14981.9	RBOHF	77.524	257976	7761.14	ACPB
77.759	343345	11345.2	LDH	77.83	238809	9118.38	GST	84.864	50685.7	7953.19	RBOHF	77.83	259074	8626.43	ACPB
77.759	355961	11024	LDH	77.83	307813	10444.3	GST	85.171	50669.8	4543.18	RBOHF	77.83	285833	8348.87	ACPB
77.759	318795	10239.5	LDH	77.83	235440	8751.47	GST	85.477	49202.7	2553.34	RBOHF	77.83	213464	6982.71	ACPB
77.759	367953	12560.4	LDH	77.83	311918	11409.3	GST	85.783	50101.3	1487.49	RBOHF	77.83	299347	8804.92	ACPB
77.759	411176	13690	LDH	77.83	258880	10016.1	GST	86.089	48972.9	961.623	RBOHF	77.83	288854	8663.15	ACPB
77.759	448609	14985.1	LDH	77.83	309688	11852.6	GST	86.396	49265.8	718.202	RBOHF	77.83	55143.4	1070.35	ACPB
77.759	296422	9658.55	LDH	77.83	249003	9862.95	GST	86.702	48155.3	604.799	RBOHF	77.83	254193	7869.35	ACPB
77.759	353696	11104.8	LDH	77.83	259234	9488.26	GST	87.008	48315	543.071	RBOHF	77.83	293632	10280.5	ACPB
77.759	360895	12658.7	LDH	77.83	249123	8952.23	GST	87.315	47469.6	500.917	RBOHF	77.83	282870	9645.99	ACPB
77.759	383684	12713.5	LDH	77.83	310403	11501.2	GST	87.621	48299.6	470.487	RBOHF	77.83	276379	6357.77	ACPB
77.759	317729	10326	LDH	77.83	254285	9987.59	GST	87.927	47861.7	452.353	RBOHF	77.83	250598	8823.3	ACPB
77.759	368977	12567.6	LDH	77.83	305805	11183.5	GST	88.233	46515.8	446.783	RBOHF	77.83	291657	9404.57	ACPB
77.759	360303	11690.2	LDH	77.83	261924	9736.85	GST	88.54	47173.1	451.648	RBOHF	77.83	231124	7925.35	ACPB
77.759	357897	11724.5	LDH	77.83	301784	11490.4	GST	88.846	46291.4	463.534	RBOHF	77.83	301472	9851.1	ACPB
77.759	366164	12774.8	LDH	77.83	259558	10149.4	GST	89.152	47316.1	478.106	RBOHF	77.83	250552	7581.26	ACPB
77.759	360996	13085.5	LDH	77.83	348877	12740.6	GST	89.459	45660	489.461	RBOHF	77.83	288929	10122.8	ACPB
77.761	340791	11263.4	LDH	77.832	255311	9425.57	GST	89.765	45916	491.294	RBOHF	77.831	303063	9358.67	ACPB
77.761	316615	10380.8	LDH	77.832	221274	8116.98	GST	90.071	45143.2	481.133	RBOHF	77.831	256700	7816.38	ACPB
78.062	340835	11343.8	LDH	78.136	234297	9169.44	GST	90.378	45249.2	464.042	RBOHF	78.137	256914	8850.78	ACPB
78.062	353164	10902.9	LDH	78.136	305386	10616.4	GST	90.684	44820.2	450.643	RBOHF	78.137	283402	8422.36	ACPB
78.062	315050	10198	LDH	78.136	233939	8880.32	GST	90.99	45310.7	448.696	RBOHF	78.137	210572	7045.58	ACPB
78.062	364133	12416.3	LDH	78.136	308963	11590.8	GST	91.296	44743.4	454.703	RBOHF	78.137	296270	8918.6	ACPB
78.062	407705	13619.4	LDH	78.136	255631	10220.9	GST	91.603	43962.6	453.598	RBOHF	78.137	287150	8845.57	ACPB
78.062	443160	14952.2	LDH	78.136	307358	12054.8	GST	91.909	43316.3	428.861	RBOHF	78.137	54981	1100.48	ACPB
78.062	293392	9661.61	LDH	78.136	245249	10035.3	GST	92.215	43216.2	375.862	RBOHF	78.137	250719	7926.47	ACPB
78.062	349442	11068.2	LDH	78.136	256518	9605.2	GST	92.522	43529.3	307.706	RBOHF	78.137	290375	10489.7	ACPB
78.062	356977	12612.3	LDH	78.136	246330	9141.88	GST	92.828	43769.4	248.2	RBOHF	78.137	279785	9872.52	ACPB
78.062	379557	12639.2	LDH	78.136	307386	11780.1	GST	93.134	42831.2	217.186	RBOHF	78.137	273887	6729.86	ACPB
78.062	314543	10329.8	LDH	78.136	251270	10149.7	GST	93.44	43452	218.95	RBOHF	78.137	247819	8999.1	ACPB
78.062	364823	12390.5	LDH	78.136	302157	11445	GST	93.747	42310.2	241.4	RBOHF	78.137	288466	9588.53	ACPB
78.062	357365	11557	LDH	78.136	258724	9921.77	GST	94.053	42553.9	264.768	RBOHF	78.137	229481	8038.2	ACPB
78.062	353656	11693.5	LDH	78.136	298631	11744.5	GST	94.359	42086.5	272.898	RBOHF	78.137	299549	10179.5	ACPB
78.062	362606	12728.8	LDH	78.136	256953	10255	GST	94.666	41891.4	259.935	RBOHF	78.137	248314	7896.68	ACPB
78.062	357080	13037.5	LDH	78.136	343799	13075.7	GST	72	328588	6834.3	RBOHF	78.137	283883	10286.7	ACPB
78.064	336810	11246.2	LDH	78.139	252855	9449.96	GST	72.307	325736	7015.92	RBOHF	78.138	299170	9308.86	ACPB
78.064	314563	10375.1	LDH	78.139	217973	8124.59	GST	72.613	324637	7208.05	RBOHF	78.138	253817	7948.6	ACPB
78.365	337405	11295.4	LDH	78.443	232245	9302.63	GST	72.92	323244	7463.07	RBOHF	78.444	254357	9126.96	ACPB
78.365	350460	10757	LDH	78.443	301832	10886.5	GST	73.226	319220	7718.37	RBOHF	78.444	281854	8653.65	ACPB
78.365	311746	10152.3	LDH	78.443	230702	9070.18	GST	73.533	317425	7958.47	RBOHF	78.444	208783	7168.4	ACPB
78.365	360655	12244.9	LDH	78.443	304822	11876.1	GST	73.84	315021	8179.83	RBOHF	78.444	293720	9161.13	ACPB
78.365	402856	13497.9	LDH	78.443	253015	10544	GST	74.146	312563	8379.02	RBOHF	78.444	282829	9198.78	ACPB
78.365	439525	14872.4	LDH	78.443	303478	12387.4	GST	74.453	310056	8553.42	RBOHF	78.444	54960.3	1115	ACPB
78.365	290014	9622.66	LDH	78.443	243486	10306.2	GST	74.76	306298	8703.29	RBOHF	78.444	247891	8151.07	ACPB
78.365	347019	11071	LDH	78.443	254677	9871.65	GST	75.066	304552	8834.74	RBOHF	78.444	287893	11039.1	ACPB
78.365	352844	12521.3	LDH	78.443	243797	9429.69	GST	75.373	301437	8958.2	RBOHF	78.444	276460	10419.7	ACPB
78.365	376304	12586.6	LDH	78.443	303557	12205.3	GST	75.679	299403	9084.36	RBOHF	78.444	271430	7512.61	ACPB
78.365	310859	10347.6	LDH	78.443	248467	10404.4	GST	75.986	296080	9219.07	RBOHF	78.444	245692	9405.86	ACPB
78.365	361534	12225.1	LDH	78.443	297644	11842.4	GST	76.293	292870	9359.91	RBOHF	78.444	286239	10150.5	ACPB
78.365	353488	11422.7	LDH	78.443	256031	10160.3	GST	76.599	290990	9494.61	RBOHF	78.444	226367	8437.9	ACPB
78.365	349656	11626.6	LDH	78.443	294916	12182.8	GST	76.906	288147	9604.06	RBOHF	78.444	295670	10897.8	ACPB
78.365	358733	12625.6	LDH	78.443	252941	10410.5	GST	77.213	284605	9670.97	RBOHF	78.444	244837	8425.38	ACPB
78.365	353682	12948.9	LDH	78.443	340758	13561.5	GST	77.519	281760	9693.78	RBOHF	78.444	281262	10764.1	ACPB
78.368	333982	11194.4	LDH	78.446	249762	9542.32	GST	77.826	278445	9699.84	RBOHF	78.445	297112	9365.73	ACPB
78.368	310168	10351	LDH	78.446	215678	8202.17	GST	78.132	275525	9753.84	RBOHF	78.445	251493	8216.15	ACPB
78.668	333496	11194.4	LDH	78.75	230577	9596.48	GST	78.439	273336	9962.02	RBOHF	78.751	250648	9532.76	ACPB
78.668	346531	10593.6	LDH	78.75	299095	11317.2	GST	78.746	270632	10479.7	RBOHF	78.751	278295	9138.63	ACPB
78.668	309366	10095.1	LDH	78.75	227708	9350.82	GST	79.052	267334	11529.3	RBOHF	78.751	206994	7471.35	ACPB
78.668	356412	12060.3	LDH	78.75	299747	12322.7	GST	79.359	264761	13424.6	RBOHF	78.751	290722	9720.8	ACPB
78.668	398406	13341.2	LDH	78.75	251177	11022.2	GST	79.666	261856	16579.4	RBOHF	78.751	280796	9888.81	ACPB
78.668	434282	14748.6	LDH	78.75	299723	12925.6	GST	79.972	258399	21470.2	RBOHF	78.751	53552.2	1115.6	ACPB
78.668	287072	9540.84	LDH	78.75	239576	10712.1	GST	80.279	254773	28522.4	RBOHF	78.751	245707	8724.22	ACPB
78.668	343038	11097.4	LDH	78.75	251234	10353.6	GST	80.585	250276	37919.3	RBOHF	78.751	285658	12200.8	ACPB
78.668	348421	12393.3	LDH	78.75	241416	9867.94	GST	80.892	244053	49377.1	RBOHF	78.751	274343	11595.1	ACPB
78.668	371556	12540.7	LDH	78.75	300445	12856.8	GST	81.199	233795	61980.5	RBOHF	78.751	267936	9050.38	ACPB
78.668	307786	10359	LDH	78.75	245498	10808.1	GST	81.505	216759	74189	RBOHF	78.751	243247	10300.4	ACPB
78.668	357282	12086.2	LDH	78.75	295594	12452.8	GST	81.812	191310	84083.5	RBOHF	78.751	284288	11411.1	ACPB
78.668	349439	11313.4	LDH	78.75	251770	10512.3	GST	82.119	158920	89823	RBOHF	78.751	225293	9383.19	ACPB
78.668	346115	11542.9	LDH	78.75	291599	12868.1	GST	82.425	122261	90168.1	RBOHF	78.751	292706	12376.2	ACPB
78.668	354388	12483.9	LDH	78.75	250146	10687	GST	82.732	92587	84871.7	RBOHF	78.751	242233	9305.09	ACPB
78.668	349093	12843.1	LDH	78.75	336044	14288.7	GST	83.038	67954.5	74770.9	RBOHF	78.751	279701	11861.1	ACPB
78.671	329181	11094.7	LDH	78.753	248003	9741.65	GST	83.345	52647	61542	RBOHF	78.752	293356	9608.77	ACPB
78.671	306990	10305.5	LDH	78.753	213303	8419.17	GST	83.652	44249.7	47218.3	RBOHF	78.752	248261	8753.1	ACPB
78.971	330060	11050	LDH	79.057	227340	10157.5	GST	83.958	42403.6	33661.1	RBOHF	79.058	247655	10274.7	ACPB
78.971	342297	10425.5	LDH	79.057	294973	11975.6	GST	84.265	41191.9	22170.1	RBOHF	79.058	275987	10045.8	ACPB
78.971	305631	10017.8	LDH	79.057	225623	9784.04	GST	84.572	40707.7	13335.2	RBOHF	79.058	205224	8170.87	ACPB
78.971	352771	11879.4	LDH	79.057	297407	13039.2	GST	84.878	40574.1	7151.85	RBOHF	79.058	287731	10929.4	ACPB
78.971	394547	13171.6	LDH	79.057	245966	11728.5	GST	85.185	39765.4	4199.95	RBOHF	79.058	277290	11230.2	ACPB
78.971	429774	14594.2	LDH	79.057	295914	13789.1	GST	85.491	39346.6	2436.02	RBOHF	79.058	53707.8	1108.38	ACPB
78.971	283981	9429.61	LDH	79.057	236098	11330.6	GST	85.798	39710.3	1466.8	RBOHF	79.058	243136	9961.91	ACPB
78.971	339047	11128.2	LDH	79.057	248629	11137.8	GST	86.105	39318.4	991.151	RBOHF	79.058	282506	14401.2	ACPB
78.971	345429	12241.3	LDH	79.057	237637	10543.7	GST	86.411	39658.2	804.098	RBOHF	79.058	271810	13882.9	ACPB
78.971	368148	12479.3	LDH	79.057	297208	13859.1	GST	86.718	39132.7	772.103	RBOHF	79.058	265448	11895.9	ACPB
78.971	304565	10341.5	LDH	79.057	242889	11459.2	GST	87.025	38300	806.645	RBOHF	79.058	240436	12085.3	ACPB
78.971	353778	11983.6	LDH	79.057	291645	13414.6	GST	87.331	38626.4	848.919	RBOHF	79.058	280382	13856.4	ACPB
78.971	346222	11247	LDH	79.057	249256	11095.7	GST	87.638	37501.5	865.049	RBOHF	79.058	222316	11259.1	ACPB
78.971	343080	11462.4	LDH	79.057	287033	13916.5	GST	87.944	37628.4	844.984	RBOHF	79.058	290507	15197.3	ACPB
78.971	350583	12322.1	LDH	79.057	246334	11201.1	GST	88.251	37286	798.708	RBOHF	79.058	239621	10819	ACPB
78.971	345983	12737.5	LDH	79.057	333157	15419.7	GST	88.558	37154.1	747.201	RBOHF	79.058	276080	14052.5	ACPB
78.974	326937	10947.7	LDH	79.06	244435	10101.6	GST	88.864	37036.2	710.038	RBOHF	79.059	290446	10208.8	ACPB
78.974	303853	10244.3	LDH	79.06	211454	8858.09	GST	89.171	37502.9	694.565	RBOHF	79.059	246643	9813.67	ACPB
79.274	327076	10879.7	LDH	79.364	224030	11132.1	GST	89.478	36622.6	692.389	RBOHF	79.364	245703	11733.5	ACPB
79.274	339775	10275.7	LDH	79.364	291376	12953.5	GST	89.784	35979.1	685.397	RBOHF	79.364	272786	11670.4	ACPB
79.274	302597	9913.73	LDH	79.364	221489	10481.9	GST	90.091	35520.5	657.846	RBOHF	79.364	202160	9602.55	ACPB
79.274	349502	11720.1	LDH	79.364	294053	14214.4	GST	90.397	36486.4	606.674	RBOHF	79.364	285498	13293	ACPB
79.274	391092	13011.6	LDH	79.364	243673	12801.5	GST	90.704	35242.7	543.66	RBOHF	79.364	274639	13729.3	ACPB
79.274	425086	14429	LDH	79.364	292595	15165.8	GST	91.011	35844.8	488.98	RBOHF	79.364	53801.6	1100.46	ACPB
79.274	281453	9308.91	LDH	79.364	234393	12304.7	GST	91.317	35520.7	461.015	RBOHF	79.364	241997	12333.3	ACPB
79.274	335733	11150.3	LDH	79.364	244660	12363.5	GST	91.624	35717.5	468.366	RBOHF	79.364	279726	18239.5	ACPB
79.274	341366	12082.8	LDH	79.364	235125	11597.1	GST	91.931	35184.1	507.188	RBOHF	79.364	268857	17925.4	ACPB
79.274	364164	12387.5	LDH	79.364	291522	15414.9	GST	92.237	34945.7	563.482	RBOHF	79.364	262279	16780.4	ACPB
79.274	301361	10281.1	LDH	79.364	239732	12514	GST	92.544	34980.8	618.424	RBOHF	79.364	238470	15307.8	ACPB
79.274	350044	11920.6	LDH	79.364	287091	14955.6	GST	92.85	34245.2	654.332	RBOHF	79.364	277294	18145.3	ACPB
79.274	343945	11224.1	LDH	79.364	245460	12098.3	GST	93.157	34383.9	659.841	RBOHF	79.364	220763	14573.1	ACPB
79.274	340161	11394.7	LDH	79.364	283374	15527.8	GST	93.464	33758.3	633.204	RBOHF	79.364	286621	20133.3	ACPB
79.274	347553	12151.4	LDH	79.364	244763	12123.6	GST	93.77	33670.5	582.78	RBOHF	79.364	237929	13426.6	ACPB
79.274	342370	12633.9	LDH	79.364	327544	17205.7	GST	94.077	33721	524.02	RBOHF	79.364	275063	17968.6	ACPB
79.277	323059	10771.1	LDH	79.367	241643	10707.9	GST	94.384	34052.1	473.366	RBOHF	79.366	288290	11487.1	ACPB
79.277	301036	10176.3	LDH	79.367	209465	9619.32	GST	94.69	33525.6	441.727	RBOHF	79.366	244056	11805.1	ACPB
79.577	323785	10702.3	LDH	79.67	220746	12725.5	GST	72	423449	9075.41	UDP-GT	79.671	243446	14466.9	ACPB
79.577	336992	10194.5	LDH	79.67	287545	14400.3	GST	72.307	420020	9263.58	UDP-GT	79.671	270144	14477	ACPB
79.577	299289	9782.87	LDH	79.67	219542	11622.6	GST	72.613	417768	9453.68	UDP-GT	79.671	200919	12216.4	ACPB
79.577	345507	11599	LDH	79.67	288811	16134.1	GST	72.92	414705	9645.49	UDP-GT	79.671	282811	17475.6	ACPB
79.577	386800	12878.5	LDH	79.67	239492	14473.2	GST	73.226	412420	9843.86	UDP-GT	79.671	271662	18065.8	ACPB
79.577	421514	14270	LDH	79.67	288235	17338.4	GST	73.533	408491	10053.7	UDP-GT	79.671	53102	1095.44	ACPB
79.577	277912	9203.89	LDH	79.67	230322	13860.4	GST	73.839	405421	10284.4	UDP-GT	79.671	239045	16425.8	ACPB
79.577	332659	11159.9	LDH	79.67	241547	14255.2	GST	74.146	402296	10579.3	UDP-GT	79.671	276597	24422.9	ACPB
79.577	337141	11936.1	LDH	79.67	231270	13242.6	GST	74.452	398629	10859.4	UDP-GT	79.671	266006	24409.9	ACPB
79.577	359556	12265.9	LDH	79.67	288464	17834.4	GST	74.759	395225	11103.5	UDP-GT	79.671	259864	24450.6	ACPB
79.577	297105	10180	LDH	79.67	236012	14201	GST	75.066	391540	11295.2	UDP-GT	79.671	236461	20584.5	ACPB
79.577	346463	11892	LDH	79.67	282760	17409.7	GST	75.372	387048	11427.1	UDP-GT	79.671	274536	25011.5	ACPB
79.577	340084	11227	LDH	79.67	243041	13780.8	GST	75.679	384688	11501.9	UDP-GT	79.671	217804	19877	ACPB
79.577	335072	11337.3	LDH	79.67	280106	18001.2	GST	75.985	379971	11528.8	UDP-GT	79.671	284652	27997.1	ACPB
79.577	343492	11975.4	LDH	79.67	240901	13683.4	GST	76.292	377054	11521.6	UDP-GT	79.671	234184	17718.9	ACPB
79.577	336868	12520.9	LDH	79.67	323440	19997.1	GST	76.598	372846	11494.8	UDP-GT	79.671	270510	24293.6	ACPB
79.58	319626	10592.9	LDH	79.674	238249	11700.2	GST	76.905	369206	11461.3	UDP-GT	79.673	285297	13955.9	ACPB
79.58	297785	10106.6	LDH	79.674	205554	10839.4	GST	77.211	366262	11430.9	UDP-GT	79.673	241292	15279.2	ACPB
79.88	320511	10532	LDH	79.977	218098	15215.4	GST	77.518	362573	11408.8	UDP-GT	79.978	240309	19134.6	ACPB
79.88	333358	10168	LDH	79.977	283363	16556.6	GST	77.825	357807	11396.8	UDP-GT	79.978	266404	19079.6	ACPB
79.88	296079	9651.52	LDH	79.977	216679	13455.6	GST	78.131	355918	11396.4	UDP-GT	79.978	198503	16510.4	ACPB
79.88	342464	11528.2	LDH	79.977	285454	19182.2	GST	78.438	350974	11413	UDP-GT	79.978	278859	24187.5	ACPB
79.88	382764	12780.9	LDH	79.977	236574	17078	GST	78.744	347738	11464.8	UDP-GT	79.978	268380	24965.1	ACPB
79.88	416512	14124.1	LDH	79.977	283838	20691	GST	79.051	344660	11598.4	UDP-GT	79.978	53217.3	1091.04	ACPB
79.88	275532	9121.95	LDH	79.977	226632	16310.7	GST	79.357	340162	11918.8	UDP-GT	79.978	235826	22823.7	ACPB
79.88	328896	11160.4	LDH	79.977	237985	17131.3	GST	79.664	336890	12631.6	UDP-GT	79.978	272660	33568.8	ACPB
79.88	333608	11815.2	LDH	79.977	228278	15776.8	GST	79.97	333178	14091.4	UDP-GT	79.978	263890	33834.9	ACPB
79.88	355933	12130.4	LDH	79.977	284003	21533.6	GST	80.277	330030	16836.5	UDP-GT	79.978	256596	35353.2	ACPB
79.88	295209	10055.5	LDH	79.977	231904	16821.5	GST	80.583	326297	21570.8	UDP-GT	79.978	233319	28421.8	ACPB
79.88	343514	11882.1	LDH	79.977	279438	21200.3	GST	80.89	322546	29050.5	UDP-GT	79.978	271548	35017	ACPB
79.88	335285	11229.8	LDH	79.977	238954	16466.3	GST	81.197	318607	39842	UDP-GT	79.978	215047	27585	ACPB
79.88	332270	11290.7	LDH	79.977	274824	21724	GST	81.503	312285	53977.3	UDP-GT	79.978	281361	39343.3	ACPB
79.88	339281	11793.9	LDH	79.977	237411	16168.3	GST	81.81	304099	70618.6	UDP-GT	79.978	232244	24264.4	ACPB
79.88	333992	12383.4	LDH	79.977	319314	24232.9	GST	82.116	288677	87912.3	UDP-GT	79.978	268809	33545.9	ACPB
79.883	316751	10439.2	LDH	79.981	235276	13291.9	GST	82.423	257344	103199	UDP-GT	79.98	282001	18301.9	ACPB
79.883	294687	10035	LDH	79.981	203209	12716	GST	82.729	214182	113612	UDP-GT	79.98	239245	20844.2	ACPB
80.183	317542	10377.6	LDH	80.284	214305	18942.6	GST	83.036	164488	116894	UDP-GT	80.285	239401	26321.9	ACPB
80.183	330941	10194.1	LDH	80.284	278995	19771.6	GST	83.342	120004	112133	UDP-GT	80.285	264141	26110.1	ACPB
80.183	293336	9524.85	LDH	80.284	213628	16290.4	GST	83.649	83314	100080	UDP-GT	80.285	197079	22875.1	ACPB
80.183	338392	11511.6	LDH	80.284	281379	23807.1	GST	83.956	60666.6	82918.9	UDP-GT	80.285	277271	33948.8	ACPB
80.183	378517	12728.9	LDH	80.284	232044	21019.5	GST	84.262	52103.1	63588.7	UDP-GT	80.285	266128	34937.4	ACPB
80.183	412551	13990.4	LDH	80.284	278954	25669.8	GST	84.569	49770.7	44934.1	UDP-GT	80.285	52530.1	1081.17	ACPB
80.183	273086	9054.59	LDH	80.284	223706	20028.6	GST	84.875	49205.1	29028.3	UDP-GT	80.285	232754	31882.4	ACPB
80.183	325196	11155.7	LDH	80.284	234579	21365.2	GST	85.182	48386.7	16872.4	UDP-GT	80.285	269690	45875.4	ACPB
80.183	330631	11724	LDH	80.284	224118	19554.7	GST	85.488	48841.4	8908.8	UDP-GT	80.285	259416	46191.7	ACPB
80.183	353252	12001.7	LDH	80.284	279806	26977.6	GST	85.795	47998.4	4929.57	UDP-GT	80.285	253190	49237.7	ACPB
80.183	291206	9932.08	LDH	80.284	229483	20716.5	GST	86.101	48247	2682.12	UDP-GT	80.285	230184	38941.4	ACPB
80.183	338985	11870.3	LDH	80.284	275030	26770.6	GST	86.408	47664.4	1537.24	UDP-GT	80.285	268010	48185.5	ACPB
80.183	332304	11211.8	LDH	80.284	235638	20507.4	GST	86.714	47331	1012.35	UDP-GT	80.285	212926	37707.6	ACPB
80.183	328309	11243.4	LDH	80.284	270874	27114	GST	87.021	47166.9	792.604	UDP-GT	80.285	277210	54074	ACPB
80.183	335706	11614.4	LDH	80.284	233794	19907.8	GST	87.328	46504.8	701.239	UDP-GT	80.285	229704	33351.6	ACPB
80.183	330199	12212.2	LDH	80.284	313016	30378.9	GST	87.634	46208.3	655.168	UDP-GT	80.285	264032	45763.4	ACPB
80.187	314286	10323.1	LDH	80.288	233135	15777.4	GST	87.941	46342.3	624.749	UDP-GT	80.286	279547	25264.6	ACPB
80.187	290965	9974.91	LDH	80.288	199754	15519.1	GST	88.247	46371.5	604.507	UDP-GT	80.286	236332	28968.4	ACPB
80.486	314199	10242.3	LDH	80.591	210094	24253.8	GST	88.554	45124.3	595.031	UDP-GT	80.592	235634	36273.8	ACPB
80.486	327420	10252.5	LDH	80.591	273931	24476.9	GST	88.86	45708.6	594.644	UDP-GT	80.592	260544	35956.6	ACPB
80.486	290857	9418.2	LDH	80.591	209799	20456.6	GST	89.167	45282.3	598.4	UDP-GT	80.592	194321	31365.4	ACPB
80.486	335735	11531.2	LDH	80.591	276457	30437	GST	89.473	44654.4	600.814	UDP-GT	80.592	272219	46753.7	ACPB
80.486	375491	12701.8	LDH	80.591	228747	26680.5	GST	89.78	44492.4	598.864	UDP-GT	80.592	261865	47928.7	ACPB
80.486	408262	13874.5	LDH	80.591	273774	32671.1	GST	90.086	44275.4	593.105	UDP-GT	80.592	51938.7	1061.2	ACPB
80.486	269588	8996.3	LDH	80.591	219201	25368.9	GST	90.393	44296.6	586.406	UDP-GT	80.592	229451	43434.4	ACPB
80.486	322267	11145.4	LDH	80.591	230047	27285.5	GST	90.7	43829.3	582.036	UDP-GT	80.592	264165	60759.1	ACPB
80.486	327476	11653.7	LDH	80.591	221101	24913.5	GST	91.006	43266.2	582.645	UDP-GT	80.592	252547	60669.7	ACPB
80.486	348986	11910.1	LDH	80.591	274221	34551.3	GST	91.313	43199.3	590.229	UDP-GT	80.592	245881	64851.9	ACPB
80.486	289237	9849.49	LDH	80.591	224992	26180.9	GST	91.619	43097.3	605.879	UDP-GT	80.592	224910	51595.6	ACPB
80.486	335592	11840.6	LDH	80.591	269566	34445.4	GST	91.926	43232.8	628.396	UDP-GT	80.592	261905	63651.9	ACPB
80.486	328590	11171.9	LDH	80.591	230707	26208.4	GST	92.232	41771.4	653.114	UDP-GT	80.592	207487	49596.1	ACPB
80.486	325300	11196.7	LDH	80.591	265054	34499.2	GST	92.539	42299.8	672.678	UDP-GT	80.592	270394	71103	ACPB
80.486	332632	11464.7	LDH	80.591	229518	25215.3	GST	92.845	41680.1	680.275	UDP-GT	80.592	225288	44694.7	ACPB
80.486	326801	12037.1	LDH	80.591	306530	38790	GST	93.152	41366	672.959	UDP-GT	80.592	258478	60196.8	ACPB
80.49	310547	10239.9	LDH	80.595	228374	19516.1	GST	93.459	41191.2	653.022	UDP-GT	80.593	276730	35381.8	ACPB
80.49	288094	9918.31	LDH	80.595	196607	19560.3	GST	93.765	40725.9	626.643	UDP-GT	80.593	232226	39695.1	ACPB
80.789	310939	10129.8	LDH	80.898	205284	31381.7	GST	94.072	40866.2	601.027	UDP-GT	80.899	230435	48607.2	ACPB
80.789	324486	10320.5	LDH	80.898	269103	31092.3	GST	94.378	40149.7	581.781	UDP-GT	80.899	255619	48428.9	ACPB
80.789	287664	9344.42	LDH	80.898	205023	26217.9	GST	94.685	40516.4	571.333	UDP-GT	80.899	188872	41474.8	ACPB
80.789	331946	11566.1	LDH	80.898	269862	39322.9	GST	72	369326	7565.2	UDP-GT	80.899	265808	61753.6	ACPB
80.789	371427	12689.1	LDH	80.898	223664	34272.7	GST	72.307	366420	7806.32	UDP-GT	80.899	254603	63014.3	ACPB
80.789	404127	13749.7	LDH	80.898	268013	41849.2	GST	72.613	365311	8033.8	UDP-GT	80.899	51969.9	1032.59	ACPB
80.789	266903	8941.33	LDH	80.898	214750	32529.4	GST	72.92	361813	8236.35	UDP-GT	80.899	223464	56545.2	ACPB
80.789	318915	11122.8	LDH	80.898	223790	35013.3	GST	73.226	359375	8416.8	UDP-GT	80.899	253596	76646	ACPB
80.789	322374	11595.6	LDH	80.898	215078	32034.9	GST	73.533	356562	8590.59	UDP-GT	80.899	239854	75554.4	ACPB
80.789	345627	11844.4	LDH	80.898	266830	44359.2	GST	73.839	354070	8797.27	UDP-GT	80.899	230140	79946.7	ACPB
80.789	285958	9789.36	LDH	80.898	219382	33322.3	GST	74.146	351218	9081.09	UDP-GT	80.899	215784	65018.2	ACPB
80.789	331717	11788.7	LDH	80.898	262142	44234	GST	74.452	348921	9392.6	UDP-GT	80.899	249040	79535.3	ACPB
80.789	326251	11115.7	LDH	80.898	224647	33691.2	GST	74.759	345180	9711.65	UDP-GT	80.899	196902	61846.3	ACPB
80.789	322228	11155.9	LDH	80.898	256426	43929.1	GST	75.066	342540	10011.6	UDP-GT	80.899	254377	88285	ACPB
80.789	329304	11331.6	LDH	80.898	222967	32266.2	GST	75.372	338558	10269.4	UDP-GT	80.899	218033	57236.7	ACPB
80.789	321999	11848.7	LDH	80.898	298731	49493.3	GST	75.679	336391	10471	UDP-GT	80.899	245797	75182.9	ACPB
80.793	307360	10186.2	LDH	80.902	224338	24869.5	GST	75.985	332568	10612.2	UDP-GT	80.9	271936	48636.1	ACPB
80.793	285386	9873.88	LDH	80.902	191584	25096.3	GST	76.292	329264	10695.5	UDP-GT	80.9	227305	52363.7	ACPB
81.092	308526	10050.6	LDH	81.204	197744	40263.9	GST	76.598	325546	10726.5	UDP-GT	81.206	221547	62131.6	ACPB
81.092	320946	10337.9	LDH	81.204	261896	39849.8	GST	76.905	323319	10710.4	UDP-GT	81.206	247778	62493	ACPB
81.092	284881	9306.65	LDH	81.204	200093	33633.6	GST	77.211	319408	10651.9	UDP-GT	81.206	180871	52035.1	ACPB
81.092	328210	11584.3	LDH	81.204	260632	50321.8	GST	77.518	316446	10558.5	UDP-GT	81.206	251535	77142.1	ACPB
81.092	367278	12681.9	LDH	81.204	215802	43644.7	GST	77.825	312615	10445.6	UDP-GT	81.206	240045	78318.3	ACPB
81.092	398786	13624.8	LDH	81.204	258116	52883.3	GST	78.131	309147	10337.1	UDP-GT	81.206	51627.1	1002.66	ACPB
81.092	264212	8888.25	LDH	81.204	207913	41367.9	GST	78.438	307322	10261.8	UDP-GT	81.206	208523	69480.6	ACPB
81.092	314878	11080.4	LDH	81.204	217259	44271.2	GST	78.744	303865	10251.5	UDP-GT	81.206	230947	91106.3	ACPB
81.092	319490	11535.1	LDH	81.204	207484	40763.9	GST	79.051	300302	10348.6	UDP-GT	81.206	214832	88455.2	ACPB
81.092	341674	11789.1	LDH	81.204	257244	55995.9	GST	79.357	297016	10632.8	UDP-GT	81.206	199699	91718.9	ACPB
81.092	282533	9746.88	LDH	81.204	211109	41890.4	GST	79.664	294893	11262.4	UDP-GT	81.206	195982	77157	ACPB
81.092	327732	11727.7	LDH	81.204	251197	55620.6	GST	79.97	290903	12524.6	UDP-GT	81.206	221761	93199.1	ACPB
81.092	322102	11054	LDH	81.204	216769	42715.8	GST	80.277	287485	14872	UDP-GT	81.206	176469	72482.3	ACPB
81.092	317963	11126.1	LDH	81.204	247855	54954.9	GST	80.583	285199	18919.6	UDP-GT	81.206	225267	102753	ACPB
81.092	325186	11230	LDH	81.204	217988	40919.6	GST	80.89	282007	25359.4	UDP-GT	81.206	201831	69192.6	ACPB
81.092	319162	11668.7	LDH	81.204	288639	61945.8	GST	81.197	277836	34764.9	UDP-GT	81.206	221944	88348.7	ACPB
81.096	304683	10129.2	LDH	81.209	219366	32073.3	GST	81.503	273242	47292.8	UDP-GT	81.207	265078	64130.9	ACPB
81.096	282222	9854.09	LDH	81.209	187469	32170.5	GST	81.81	265557	62362.6	UDP-GT	81.207	215595	65489.9	ACPB
81.395	305163	9972.07	LDH	81.511	188812	50350.3	GST	82.116	253721	78467.2	UDP-GT	81.513	205661	74919.2	ACPB
81.395	316747	10274.4	LDH	81.511	254154	50559.9	GST	82.423	231259	93277.3	UDP-GT	81.513	232968	76252	ACPB
81.395	282200	9300.41	LDH	81.511	193420	42392	GST	82.729	194618	104112	UDP-GT	81.513	163849	61354.9	ACPB
81.395	324075	11569.6	LDH	81.511	251236	62681.3	GST	83.036	151379	108676	UDP-GT	81.513	227183	90397.2	ACPB
81.395	362961	12676.6	LDH	81.511	205706	54109.4	GST	83.342	112158	105786	UDP-GT	81.513	215015	91294.8	ACPB
81.395	395327	13525.6	LDH	81.511	245902	64799.6	GST	83.649	77190.1	95794.7	UDP-GT	81.513	50933.4	979.775	ACPB
81.395	261208	8843.11	LDH	81.511	198830	51236.1	GST	83.956	55725.9	80494.8	UDP-GT	81.513	183356	80001.9	ACPB
81.395	311897	11024.7	LDH	81.511	206242	54238.6	GST	84.262	45186.2	62562.4	UDP-GT	81.513	196240	101397	ACPB
81.395	315542	11468.2	LDH	81.511	199618	50443.7	GST	84.569	43550.9	44763.5	UDP-GT	81.513	180449	96874.6	ACPB
81.395	337746	11739.7	LDH	81.511	244509	68378.5	GST	84.875	42612.7	29250.3	UDP-GT	81.513	160555	97609.6	ACPB
81.395	279365	9712.03	LDH	81.511	201168	51142.7	GST	85.182	42514.1	17184.6	UDP-GT	81.513	166450	85730.2	ACPB
81.395	324569	11684.5	LDH	81.511	238168	67435.2	GST	85.488	42816.6	8747.1	UDP-GT	81.513	186919	101906	ACPB
81.395	318306	11003.6	LDH	81.511	207708	52525.4	GST	85.795	41868.1	4817.03	UDP-GT	81.513	148674	79432.2	ACPB
81.395	314752	11112.3	LDH	81.511	235407	66476.9	GST	86.101	41643.5	2580.98	UDP-GT	81.513	186098	111637	ACPB
81.395	322409	11177.2	LDH	81.511	207802	50548.8	GST	86.408	41881.7	1421.97	UDP-GT	81.513	174752	78404.8	ACPB
81.395	315466	11526.8	LDH	81.511	271864	74881.1	GST	86.714	40778.7	860.289	UDP-GT	81.513	186163	97170.7	ACPB
81.399	300414	10060.1	LDH	81.516	212856	41045.8	GST	87.021	40867.6	582.328	UDP-GT	81.514	252042	79985.1	ACPB
81.399	278862	9867.68	LDH	81.516	180315	40434.7	GST	87.328	39802.7	419.16	UDP-GT	81.514	194285	76948.6	ACPB
81.698	302009	9889.99	LDH	81.818	177088	60497.7	GST	87.634	40555.5	302.299	UDP-GT	81.819	175562	84690.9	ACPB
81.698	313706	10172.7	LDH	81.818	243546	62408.1	GST	87.941	40300.2	218.438	UDP-GT	81.819	203584	87288.6	ACPB
81.698	279182	9321.67	LDH	81.818	183058	51686.6	GST	88.247	40408.9	173.052	UDP-GT	81.819	138103	67618.7	ACPB
81.698	320634	11535.7	LDH	81.818	235037	74948	GST	88.554	39834.3	167.666	UDP-GT	81.819	188763	98897.1	ACPB
81.698	359318	12682.8	LDH	81.818	192888	64386.7	GST	88.86	39636.8	191.413	UDP-GT	81.819	177046	99363.1	ACPB
81.698	391571	13493	LDH	81.818	227537	75974.1	GST	89.167	39699.1	224.031	UDP-GT	81.819	51801.8	967.281	ACPB
81.698	258724	8821.73	LDH	81.818	185256	60930.6	GST	89.473	39254.2	244.746	UDP-GT	81.819	149313	85954.6	ACPB
81.698	307693	10971.9	LDH	81.818	190887	63555.5	GST	89.78	38698.6	241.304	UDP-GT	81.819	154952	105264	ACPB
81.698	311856	11413.7	LDH	81.818	185845	59866.6	GST	90.086	38403.4	215.387	UDP-GT	81.819	141368	98947.5	ACPB
81.698	334038	11701.7	LDH	81.818	225754	79769.2	GST	90.393	38967.3	181.829	UDP-GT	81.819	122303	96156.2	ACPB
81.698	276954	9678.46	LDH	81.818	187711	59836.8	GST	90.7	38248	161.409	UDP-GT	81.819	131822	88885.9	ACPB
81.698	321606	11692.9	LDH	81.818	218113	77922.9	GST	91.006	38337.7	169.532	UDP-GT	81.819	145630	103660	ACPB
81.698	315106	10990.9	LDH	81.818	193383	61823.5	GST	91.313	38929.6	206.696	UDP-GT	81.819	116979	81147.1	ACPB
81.698	311423	11125	LDH	81.818	216034	76788.7	GST	91.619	37563	256.798	UDP-GT	81.819	146241	112930	ACPB
81.698	318278	11196.4	LDH	81.818	195674	59985.8	GST	91.926	37472.1	295.715	UDP-GT	81.819	142896	82936.8	ACPB
81.698	312314	11459.3	LDH	81.818	249933	86383	GST	92.232	36613.5	305.278	UDP-GT	81.819	146772	99723.1	ACPB
81.702	298184	9982.57	LDH	81.823	204955	51191.1	GST	92.539	37092.1	283.439	UDP-GT	81.821	225065	93602.4	ACPB
81.702	276694	9917.75	LDH	81.823	170313	49039.6	GST	92.845	37465.3	243.619	UDP-GT	81.821	161727	84482.5	ACPB
82.001	298726	9814.64	LDH	82.125	159234	69071.6	GST	93.152	36195.5	204.48	UDP-GT	82.126	139619	89435.1	ACPB
82.001	310877	10064.1	LDH	82.125	226646	73906.4	GST	93.459	36914.4	178.313	UDP-GT	82.126	163408	93318.1	ACPB
82.001	275803	9378.78	LDH	82.125	168532	60234.7	GST	93.765	36471	166.188	UDP-GT	82.126	107515	69431.9	ACPB
82.001	316429	11535.7	LDH	82.125	211860	85127.9	GST	94.072	35596.9	161.547	UDP-GT	82.126	146225	100718	ACPB
82.001	355234	12728.2	LDH	82.125	173359	72760.3	GST	94.378	36172.7	157.492	UDP-GT	82.126	137783	100692	ACPB
82.001	387489	13579.6	LDH	82.125	199893	84407.8	GST	94.685	36038.1	151.504	UDP-GT	82.126	50568.1	961.23	ACPB
82.001	256014	8855.54	LDH	82.125	166684	68848.2	GST	72.001	290232	5653.65	UDP-GT	82.126	114303	85945.4	ACPB
82.001	304284	10961.9	LDH	82.125	168179	70553.4	GST	72.307	289224	5834.48	UDP-GT	82.126	117231	101693	ACPB
82.001	308884	11410.2	LDH	82.125	166459	67434.4	GST	72.614	287126	6020.77	UDP-GT	82.126	105902	94060.7	ACPB
82.001	330949	11697.9	LDH	82.125	197221	88083	GST	72.921	285427	6209.92	UDP-GT	82.126	89934.9	87516.7	ACPB
82.001	273467	9654.43	LDH	82.125	165895	66428.9	GST	73.228	283336	6403.54	UDP-GT	82.126	98820.5	85808.5	ACPB
82.001	317547	11790.8	LDH	82.125	189032	85084.4	GST	73.535	280421	6604.79	UDP-GT	82.126	109410	97885.1	ACPB
82.001	311592	11059.6	LDH	82.125	168849	68975.4	GST	73.841	280000	6858.66	UDP-GT	82.126	88083.1	77117.9	ACPB
82.001	307745	11190.8	LDH	82.125	186590	83907.6	GST	74.148	277025	7120.45	UDP-GT	82.126	108631	106155	ACPB
82.001	315473	11323.8	LDH	82.125	175626	67679.7	GST	74.455	273669	7367.17	UDP-GT	82.126	109812	81689	ACPB
82.001	308857	11512.3	LDH	82.125	218280	94264	GST	74.762	272111	7582.7	UDP-GT	82.126	110193	95315.2	ACPB
82.006	295064	9914.25	LDH	82.13	192799	61307.1	GST	75.069	270252	7756.11	UDP-GT	82.128	184005	102312	ACPB
82.006	272924	10008.8	LDH	82.13	155728	56690.1	GST	75.376	266411	7885	UDP-GT	82.128	124501	86388.7	ACPB
82.304	295344	9781.24	LDH	82.432	130658	74310.5	GST	75.682	264206	7975.5	UDP-GT	82.433	104598	88037.6	ACPB
82.304	307353	10011	LDH	82.432	201667	83107.9	GST	75.989	262296	8038.48	UDP-GT	82.433	124366	92914.5	ACPB
82.304	273121	9503.55	LDH	82.432	147336	66501.9	GST	76.296	259576	8084.47	UDP-GT	82.433	79581.6	66292.2	ACPB
82.304	313749	11659	LDH	82.432	179078	91141.6	GST	76.603	256489	8118.6	UDP-GT	82.433	107678	95290.4	ACPB
82.304	351628	12884.1	LDH	82.432	144929	77479.5	GST	76.91	254759	8138.45	UDP-GT	82.433	101369	94813.8	ACPB
82.304	383244	13854.5	LDH	82.432	163644	88250.4	GST	77.216	252097	8136.78	UDP-GT	82.433	50572.6	953.633	ACPB
82.304	252872	9002.75	LDH	82.432	139984	73365.2	GST	77.523	249104	8107.63	UDP-GT	82.433	83355.2	79820.4	ACPB
82.304	302067	11063.8	LDH	82.432	137783	73693.4	GST	77.83	246396	8053.02	UDP-GT	82.433	85123.1	91267.7	ACPB
82.304	304914	11518.8	LDH	82.432	138096	71548	GST	78.137	244339	7986.78	UDP-GT	82.433	76946.5	83075.2	ACPB
82.304	327210	11776.7	LDH	82.432	160728	91448.9	GST	78.444	241474	7935.49	UDP-GT	82.433	68340.6	73417	ACPB
82.304	270469	9677.12	LDH	82.432	136460	69472.2	GST	78.751	239478	7939.99	UDP-GT	82.433	72927.7	77005.6	ACPB
82.304	314018	12062.1	LDH	82.432	151169	87238.5	GST	79.057	236684	8064.15	UDP-GT	82.433	80659.7	85640.8	ACPB
82.304	309004	11294.8	LDH	82.432	140091	72431.8	GST	79.364	234560	8415.19	UDP-GT	82.433	64933.5	68060.4	ACPB
82.304	304282	11375.3	LDH	82.432	150458	86137.1	GST	79.671	231869	9174.78	UDP-GT	82.433	78187.8	92541.6	ACPB
82.304	312099	11618.8	LDH	82.432	146875	72076.9	GST	79.978	229528	10631.9	UDP-GT	82.433	81978.7	74778.1	ACPB
82.304	305115	11754.8	LDH	82.432	176349	96682.4	GST	80.285	227224	13197.7	UDP-GT	82.433	81558.1	84733.3	ACPB
82.309	291740	9887.04	LDH	82.437	173755	69719.2	GST	80.591	224543	17371.9	UDP-GT	82.435	142437	104178	ACPB
82.309	269563	10198.8	LDH	82.437	132593	61915.2	GST	80.898	221795	23630.7	UDP-GT	82.435	90953.8	82099.5	ACPB
82.607	292587	9854.97	LDH	82.738	95988.8	74870	GST	81.205	218304	32224.2	UDP-GT	82.74	76440.2	80653.2	ACPB
82.607	304812	10087.4	LDH	82.738	166682	88086.1	GST	81.512	212475	42927.1	UDP-GT	82.74	92792	86000.7	ACPB
82.607	269861	9757.71	LDH	82.738	119351	69106.4	GST	81.819	205658	54843.4	UDP-GT	82.74	59271.1	58772.3	ACPB
82.607	310510	12022.9	LDH	82.738	139231	91458.8	GST	82.125	190681	66401.7	UDP-GT	82.74	80693.2	83607.2	ACPB
82.607	347104	13259.9	LDH	82.738	110816	77300.4	GST	82.432	162778	75628.7	UDP-GT	82.74	74875.1	82799.7	ACPB
82.607	378530	14515	LDH	82.738	125666	86400	GST	82.739	130424	80661.9	UDP-GT	82.74	50370.9	938.957	ACPB
82.607	249767	9380.35	LDH	82.738	107953	73333.8	GST	83.046	95704	80326	UDP-GT	82.74	61707.1	68726.8	ACPB
82.607	297707	11418.9	LDH	82.738	106529	72067.6	GST	83.353	69411.3	74529.6	UDP-GT	82.74	64715.6	75983.4	ACPB
82.607	301074	11878.4	LDH	82.738	106765	71111.6	GST	83.66	47504.6	64304.4	UDP-GT	82.74	60102.3	68048.6	ACPB
82.607	322718	12046.5	LDH	82.738	122113	88834.1	GST	83.966	37693.1	51472.2	UDP-GT	82.74	59841.5	56549.2	ACPB
82.607	266710	9828.92	LDH	82.738	104884	68087.9	GST	84.273	34497.3	38089.1	UDP-GT	82.74	55145.5	64142.7	ACPB
82.607	309618	12626.3	LDH	82.738	114316	83601	GST	84.58	33481.1	25899.9	UDP-GT	82.74	64436.4	69266.6	ACPB
82.607	304474	11866	LDH	82.738	106873	71232.3	GST	84.887	32817.8	15995	UDP-GT	82.74	50875.2	55683.4	ACPB
82.607	300490	11854.5	LDH	82.738	115102	82654.8	GST	85.194	32411.3	8743.76	UDP-GT	82.74	61338.1	74628.4	ACPB
82.607	307445	12284.2	LDH	82.738	117110	72104.6	GST	85.5	33080.5	4492.27	UDP-GT	82.74	61355.1	63507.1	ACPB
82.607	301313	12316.8	LDH	82.738	137651	92771.5	GST	85.807	33137.4	2216.49	UDP-GT	82.74	63592.9	69979.1	ACPB
82.612	288530	9950.14	LDH	82.744	145123	74672.2	GST	86.114	32919.2	1011.83	UDP-GT	82.742	107334	98637.2	ACPB
82.612	265754	10546.4	LDH	82.744	104924	63492.1	GST	86.421	32607.8	455.482	UDP-GT	82.742	66727	72393	ACPB
82.91	289934	10127.5	LDH	83.045	67838.7	70322.4	GST	86.728	31764.7	235.381	UDP-GT	83.047	54127.8	68657	ACPB
82.91	301797	10397.6	LDH	83.045	132326	87530.9	GST	87.035	31752.9	158.345	UDP-GT	83.047	67426.1	73877.6	ACPB
82.91	266790	10305.6	LDH	83.045	93340.8	67266.4	GST	87.341	31981.3	130.312	UDP-GT	83.047	46761.2	48326	ACPB
82.91	305921	12768.1	LDH	83.045	107270	85650.4	GST	87.648	30828.3	122.741	UDP-GT	83.047	62482.8	67892.4	ACPB
82.91	343202	13990.7	LDH	83.045	84481.4	71944.6	GST	87.955	32284.1	136.045	UDP-GT	83.047	57910.9	66903.6	ACPB
82.91	374340	15765.4	LDH	83.045	96450.2	78918.7	GST	88.262	31658.1	170.646	UDP-GT	83.047	49455	918.807	ACPB
82.91	247244	10220.5	LDH	83.045	83383.5	68494.6	GST	88.569	30636.1	213.987	UDP-GT	83.047	48470.9	54731.3	ACPB
82.91	294344	12167.4	LDH	83.045	81982	65745.1	GST	88.875	30213	244.491	UDP-GT	83.047	55994.3	58587.8	ACPB
82.91	297842	12675.2	LDH	83.045	82136.6	65939	GST	89.182	30330.2	244.566	UDP-GT	83.047	53034.3	51578.1	ACPB
82.91	319565	12789.6	LDH	83.045	94555.8	80449	GST	89.489	29921	210.65	UDP-GT	83.047	56968	39707.3	ACPB
82.91	264038	10333.5	LDH	83.045	82242.2	62302.8	GST	89.796	30204.2	153.247	UDP-GT	83.047	47195	49502.2	ACPB
82.91	306609	13640.8	LDH	83.045	88855.5	74612.3	GST	90.103	29752.2	88.98	UDP-GT	83.047	59622.8	51621.1	ACPB
82.91	301423	12935.4	LDH	83.045	82451.9	65367.5	GST	90.409	29649.4	32.226	UDP-GT	83.047	45375.5	42142.6	ACPB
82.91	297218	12820.4	LDH	83.045	90086.8	73852.4	GST	90.716	29046.9	-8.606	UDP-GT	83.047	55584.2	55471	ACPB
82.91	304659	13455.7	LDH	83.045	92833.8	67550	GST	91.023	29594.1	-30.998	UDP-GT	83.047	51301.3	49938.9	ACPB
82.91	298029	13520.7	LDH	83.045	108390	82992.8	GST	91.33	29611.5	-37.686	UDP-GT	83.047	55080.2	53624.8	ACPB
82.915	285327	10175.3	LDH	83.051	115721	74877.4	GST	91.637	28764.9	-36.351	UDP-GT	83.049	77028.2	86695.5	ACPB
82.915	263405	11186.9	LDH	83.051	80494.8	60865.7	GST	91.944	28920	-37.401	UDP-GT	83.049	51104	59132.6	ACPB
83.213	287269	10905.4	LDH	83.352	46894	61361.6	GST	92.25	28298.1	-48.794	UDP-GT	83.354	42254.4	54198.9	ACPB
83.213	298463	11119.5	LDH	83.352	101156	81217.9	GST	92.557	28460.3	-70.843	UDP-GT	83.354	53542.5	58788.1	ACPB
83.213	265144	11254.3	LDH	83.352	70952.6	61097.4	GST	92.864	28821.3	-95.474	UDP-GT	83.354	40694	36808.6	ACPB
83.213	303599	14066	LDH	83.352	83235.6	74591.1	GST	93.171	28057.5	-111.224	UDP-GT	83.354	56043.1	50878.9	ACPB
83.213	339684	15283.6	LDH	83.352	64735.9	62249.1	GST	93.478	28502.8	-110.431	UDP-GT	83.354	51743.8	49846.4	ACPB
83.213	370266	17866.8	LDH	83.352	75783.2	67056.6	GST	93.784	27783.4	-93.503	UDP-GT	83.354	49518.3	901.171	ACPB
83.213	244950	11723.7	LDH	83.352	64767.8	59605.4	GST	94.091	28161	-67.903	UDP-GT	83.354	44409.5	40170.3	ACPB
83.213	291703	13514.3	LDH	83.352	65556.4	55786.7	GST	94.398	27631	-43.413	UDP-GT	83.354	54021.5	41755.5	ACPB
83.213	294403	14104.2	LDH	83.352	63609.4	56860.9	GST	94.705	27433.4	-27.233	UDP-GT	83.354	51870.9	36050.5	ACPB
83.213	315736	14233.3	LDH	83.352	75657	67720.7	GST	72	316391	7334.91	SOD3.1	83.354	55882.3	25034.9	ACPB
83.213	262062	11475.9	LDH	83.352	65871.7	53079.1	GST	72.307	314961	7862.04	SOD3.1	83.354	45299.8	35305.8	ACPB
83.213	302402	15377	LDH	83.352	73518	61832.4	GST	72.613	313301	8411.95	SOD3.1	83.354	58814.3	35250.8	ACPB
83.213	297836	14768.7	LDH	83.352	66012.2	55816.5	GST	72.92	310713	9029.76	SOD3.1	83.354	45040.4	29416.5	ACPB
83.213	292748	14595	LDH	83.352	73894.2	61247.1	GST	73.227	307532	9772.14	SOD3.1	83.354	55245.5	37778.6	ACPB
83.213	301367	15400.6	LDH	83.352	74882.7	59153.7	GST	73.533	304946	10896.8	SOD3.1	83.354	49555	36262.2	ACPB
83.213	294337	15607.4	LDH	83.352	91292.8	69025.9	GST	73.84	301806	12174.8	SOD3.1	83.354	53633.5	38068.2	ACPB
83.218	283099	10786.7	LDH	83.358	87677.2	69985.9	GST	74.146	297382	13568.8	SOD3.1	83.355	59190.3	70591.6	ACPB
83.218	259872	12339.9	LDH	83.358	61417.8	54368	GST	74.453	292755	15017.2	SOD3.1	83.355	45570.4	44655.5	ACPB
83.516	284331	12281.2	LDH	83.659	37355.7	49595.7	GST	74.76	288780	16433	SOD3.1	83.661	38861	39558.6	ACPB
83.516	295436	12297	LDH	83.659	77865.1	70128.5	GST	75.066	283623	17700.2	SOD3.1	83.661	49455.6	43215.1	ACPB
83.516	260727	12792.3	LDH	83.659	55002.9	51613.1	GST	75.373	278784	18679.6	SOD3.1	83.661	39619.7	25928.4	ACPB
83.516	298932	16141.5	LDH	83.659	71562.1	60198.3	GST	75.679	271936	19233.4	SOD3.1	83.661	55083.3	35018.9	ACPB
83.516	335115	17425.3	LDH	83.659	55546.7	49912.2	GST	75.986	265457	19265.7	SOD3.1	83.661	50811.9	34042	ACPB
83.516	365502	21239.8	LDH	83.659	67393.4	52859.4	GST	76.293	259274	18760.7	SOD3.1	83.661	49933.4	890.013	ACPB
83.516	242225	14191.7	LDH	83.659	54400.5	48210.8	GST	76.599	252481	17797.5	SOD3.1	83.661	44224.9	27007.9	ACPB
83.516	287751	15732.2	LDH	83.659	58031.6	43911.1	GST	76.906	248416	16530.4	SOD3.1	83.661	54341.2	27425.5	ACPB
83.516	290461	16461.3	LDH	83.659	55189	45465.4	GST	77.212	243839	15143.3	SOD3.1	83.661	51632.5	23092.6	ACPB
83.516	312196	16758.3	LDH	83.659	68618.5	52835	GST	77.519	239848	13800.3	SOD3.1	83.661	56128.3	13648.4	ACPB
83.516	258657	13598.9	LDH	83.659	58960.8	42010.9	GST	77.826	236377	12613.8	SOD3.1	83.661	44919.5	23171.5	ACPB
83.516	298629	18206.4	LDH	83.659	66532.6	47437.7	GST	78.132	232912	11637.5	SOD3.1	83.661	57798.5	21816.6	ACPB
83.516	294956	17718.7	LDH	83.659	56339	44234.4	GST	78.439	229084	10880.4	SOD3.1	83.661	43599.7	18845.4	ACPB
83.516	290767	17590.7	LDH	83.659	67576.3	46994.4	GST	78.745	226265	10327.6	SOD3.1	83.661	55039.6	23314	ACPB
83.516	295899	18485.5	LDH	83.659	63910	48367.4	GST	79.052	222933	9955.04	SOD3.1	83.661	49494.5	24212.5	ACPB
83.516	289949	18980	LDH	83.659	82603.1	53233.1	GST	79.359	219423	9735.58	SOD3.1	83.661	52811	24976.7	ACPB
83.522	279778	11938.3	LDH	83.665	68974.4	60759.6	GST	79.665	217454	9653.36	SOD3.1	83.662	51263.8	53089.4	ACPB
83.522	256716	14304.7	LDH	83.665	49408.1	45128.7	GST	79.972	213642	9657.01	SOD3.1	83.662	44044.9	31088.2	ACPB
83.819	280568	14474.9	LDH	83.966	33608.9	37016	GST	80.278	210590	9750.77	SOD3.1	83.968	38892.9	26562.8	ACPB
83.819	291620	14079.7	LDH	83.966	65577.9	56155.8	GST	80.585	207219	10014.1	SOD3.1	83.968	48426.9	29212.2	ACPB
83.819	257397	15170	LDH	83.966	48294.1	40416.2	GST	80.892	203341	10584.1	SOD3.1	83.968	39380.5	16845.8	ACPB
83.819	293895	19301.8	LDH	83.966	65466.5	44824.4	GST	81.198	200907	11724.9	SOD3.1	83.968	54441.7	21934.3	ACPB
83.819	330238	20798.4	LDH	83.966	52036.3	36949.6	GST	81.505	198144	13810.2	SOD3.1	83.968	50895.6	21061.1	ACPB
83.819	359438	26420.6	LDH	83.966	63389.3	38535.8	GST	81.811	194556	17269.8	SOD3.1	83.968	49090.8	898.432	ACPB
83.819	238082	17966.9	LDH	83.966	51392.4	36154.5	GST	82.118	191423	22469.8	SOD3.1	83.968	44198.4	16437.1	ACPB
83.819	283389	19170.4	LDH	83.966	55755	31962.3	GST	82.425	187184	29526.9	SOD3.1	83.968	52655.1	16515.1	ACPB
83.819	286064	20113.8	LDH	83.966	51881.3	33593.4	GST	82.731	181996	38098.7	SOD3.1	83.968	50678.5	13384.2	ACPB
83.819	308695	20816.2	LDH	83.966	65019.4	38058.6	GST	83.038	173321	47246.7	SOD3.1	83.968	55318.2	5682.22	ACPB
83.819	255450	17149.2	LDH	83.966	55321.2	30825.7	GST	83.344	159339	55488.7	SOD3.1	83.968	44611.6	13876.2	ACPB
83.819	293678	22570.5	LDH	83.966	64294.5	33554.4	GST	83.651	135815	61112.5	SOD3.1	83.968	57802.6	11933.7	ACPB
83.819	289004	22212.5	LDH	83.966	53755.2	32434.1	GST	83.957	108127	62688.7	SOD3.1	83.968	43846.4	10970.2	ACPB
83.819	285954	22261.6	LDH	83.966	65280.2	33229	GST	84.264	79501.1	59586.9	SOD3.1	83.968	54143	12719.1	ACPB
83.819	292064	23149.3	LDH	83.966	59217	36896.7	GST	84.571	60805.7	52247.3	SOD3.1	83.968	47151.2	14753.6	ACPB
83.819	286162	24072.3	LDH	83.966	80344.4	37941.8	GST	84.877	52038.7	42056.1	SOD3.1	83.968	52274	15079.8	ACPB
83.825	275764	13862.1	LDH	83.972	59822.2	48839.8	GST	85.184	50337	30872.3	SOD3.1	83.969	50443.2	36698.5	ACPB
83.825	252889	17448.4	LDH	83.972	45008	34712.4	GST	85.49	50495.3	20432.4	SOD3.1	83.969	43903.7	19855.1	ACPB
84.122	277192	17812.7	LDH	84.273	32430.6	25396.1	GST	85.797	50483.3	11897.4	SOD3.1	84.274	37289.4	16257.4	ACPB
84.122	287403	16723.9	LDH	84.273	63018.8	41522.8	GST	86.104	49300.1	6694.48	SOD3.1	84.274	48231	18001.1	ACPB
84.122	253448	18716.8	LDH	84.273	47147.4	29215.5	GST	86.41	49519.3	3669.82	SOD3.1	84.274	38846.5	10037.9	ACPB
84.122	290370	23952.7	LDH	84.273	63664.7	30579.2	GST	86.717	49904.8	1902.3	SOD3.1	84.274	53828.4	12252.4	ACPB
84.122	325589	25881.3	LDH	84.273	51064.8	25110.5	GST	87.023	48344.2	971.094	SOD3.1	84.274	49917.6	11479.3	ACPB
84.122	354479	34000.7	LDH	84.273	62518.7	25862.8	GST	87.33	48643.9	527.701	SOD3.1	84.274	48675.7	906.376	ACPB
84.122	234121	23385.7	LDH	84.273	48969.9	25054.4	GST	87.637	48978.4	335.792	SOD3.1	84.274	43301.4	8813.19	ACPB
84.122	278270	24237	LDH	84.273	54111.7	21413.4	GST	87.943	47963.4	258.145	SOD3.1	84.274	52498.4	9018.48	ACPB
84.122	281084	25465.9	LDH	84.273	50695.9	22815.7	GST	88.25	47802.2	224.27	SOD3.1	84.274	49836.2	6805.68	ACPB
84.122	304533	26875.9	LDH	84.273	63162.7	25144.2	GST	88.556	47496.3	200.52	SOD3.1	84.274	54318.3	2042.72	ACPB
84.122	251377	22593.8	LDH	84.273	53782.7	20914.2	GST	88.863	47751.1	170.7	SOD3.1	84.274	43590.1	7434.03	ACPB
84.122	289822	28907.4	LDH	84.273	64276.4	21719.5	GST	89.17	47291.1	127.113	SOD3.1	84.274	56562.8	5372.93	ACPB
84.122	284033	28690.7	LDH	84.273	52905.6	21895.4	GST	89.476	46442.6	69.274	SOD3.1	84.274	44395.1	5656.15	ACPB
84.122	281516	29010	LDH	84.273	64781.1	21515.2	GST	89.783	46516.2	5.632	SOD3.1	84.274	54512	5724.31	ACPB
84.122	287137	29830.2	LDH	84.273	56580.2	26230.4	GST	90.089	46875.3	-47.021	SOD3.1	84.274	47940.9	8072.41	ACPB
84.122	280959	31238.8	LDH	84.273	79619.6	24852.9	GST	90.396	46287.7	-69.996	SOD3.1	84.274	51324.7	8294.87	ACPB
84.128	273068	16891.5	LDH	84.279	57435.9	36218.6	GST	90.703	47267.9	-53.096	SOD3.1	84.276	49592.2	23111.7	ACPB
84.128	249148	22174.9	LDH	84.279	42999.1	24649	GST	91.009	46222.1	-2.111	SOD3.1	84.276	43728.5	11523.1	ACPB
84.425	272122	22762.9	LDH	84.579	31459.2	15875.1	GST	91.316	45353.8	62.473	SOD3.1	84.581	38048.5	8891.38	ACPB
84.425	282875	20648.8	LDH	84.579	61207.4	28164.8	GST	91.622	45620.2	115.334	SOD3.1	84.581	47934.6	9916.2	ACPB
84.425	248776	23826.1	LDH	84.579	46389	19371.6	GST	91.929	45674	138.655	SOD3.1	84.581	38209.1	5406.09	ACPB
84.425	283761	30566.4	LDH	84.579	64299.9	18855.9	GST	92.236	44990.8	130.057	SOD3.1	84.581	53740	6047.7	ACPB
84.425	319712	33200.5	LDH	84.579	50292.2	15491.8	GST	92.542	44069.5	103.163	SOD3.1	84.581	50052.1	5671.19	ACPB
84.425	346344	44483.1	LDH	84.579	61907.9	15847.9	GST	92.849	44951.6	80.894	SOD3.1	84.581	49234.2	903.556	ACPB
84.425	227692	30681.9	LDH	84.579	49022.5	15949.5	GST	93.155	45113.7	84.043	SOD3.1	84.581	43456.3	4455.21	ACPB
84.425	273132	31323.5	LDH	84.579	54082.2	13091.4	GST	93.462	44693.3	120.234	SOD3.1	84.581	52548.6	4598.63	ACPB
84.425	275415	32866.2	LDH	84.579	49966.5	14100.9	GST	93.769	43843	179.602	SOD3.1	84.581	50528	3525.16	ACPB
84.425	297654	35331.3	LDH	84.579	63133.7	15032.2	GST	94.075	43222.9	241.121	SOD3.1	84.581	54970.2	1527	ACPB
84.425	247902	30300.4	LDH	84.579	55327.5	13062.9	GST	94.382	43450.5	285.62	SOD3.1	84.581	44540.2	3846.6	ACPB
84.425	283171	37522.4	LDH	84.579	62502	12655.5	GST	94.688	43188.9	306.34	SOD3.1	84.581	57403.3	2816.59	ACPB
84.425	277890	37471.1	LDH	84.579	50717.9	13480.1	GST	72	339753	7911.89	SOD3.1	84.581	42331.9	2796.81	ACPB
84.425	275286	38050.2	LDH	84.579	64573.2	12596.2	GST	72.307	338081	8002.34	SOD3.1	84.581	53578.8	2567.3	ACPB
84.425	280388	38826.7	LDH	84.579	54105	17335.8	GST	72.613	336095	8120.44	SOD3.1	84.581	47574.4	4335.41	ACPB
84.425	274486	40598.6	LDH	84.579	78382.5	14779.9	GST	72.92	332709	8275.8	SOD3.1	84.581	51826	4406.31	ACPB
84.431	268539	21447.5	LDH	84.586	56440.1	24651.4	GST	73.227	330952	8470.48	SOD3.1	84.583	51009.5	13012.3	ACPB
84.431	244747	28856.9	LDH	84.586	43222.2	16054.9	GST	73.533	328411	8694.18	SOD3.1	84.583	43480.8	5946.52	ACPB
84.728	266786	29908.6	LDH	84.886	32269.3	8849.11	GST	73.84	325152	8933.64	SOD3.1	84.888	37656.6	4447.26	ACPB
84.728	278267	26441.7	LDH	84.886	59593	17311.4	GST	74.146	321884	9209.11	SOD3.1	84.888	47830.4	5009.08	ACPB
84.728	242506	30863	LDH	84.886	45313.1	11640.1	GST	74.453	318261	9430.51	SOD3.1	84.888	38466.4	2987.98	ACPB
84.728	276451	39553.5	LDH	84.886	63521	10190.8	GST	74.76	315246	9579.96	SOD3.1	84.888	53344.2	3338.57	ACPB
84.728	311375	43189.4	LDH	84.886	49791.2	8454.23	GST	75.066	312473	9649.67	SOD3.1	84.888	49051.3	3141.93	ACPB
84.728	336296	58032.5	LDH	84.886	61752.6	8823.25	GST	75.373	309746	9639.94	SOD3.1	84.888	48393.5	866.294	ACPB
84.728	221784	39829.5	LDH	84.886	47966.1	9210.75	GST	75.679	304975	9560.81	SOD3.1	84.888	42753.5	2468.51	ACPB
84.728	265334	40641.9	LDH	84.886	53338.9	7257.46	GST	75.986	302017	9433.83	SOD3.1	84.888	52093.9	3362.14	ACPB
84.728	267903	42436.6	LDH	84.886	49019.5	7751.85	GST	76.293	299673	9289.94	SOD3.1	84.888	50089.6	2631.8	ACPB
84.728	290178	46355.5	LDH	84.886	61910	8192.73	GST	76.599	296383	9158.98	SOD3.1	84.888	53912.6	1246.99	ACPB
84.728	241573	40348.8	LDH	84.886	53906.6	7525.29	GST	76.906	293836	9060.13	SOD3.1	84.888	42974.1	2724.98	ACPB
84.728	274064	48405.8	LDH	84.886	61649.4	6822.52	GST	77.212	290725	8998.8	SOD3.1	84.888	57093.1	2134.41	ACPB
84.728	270356	48536.1	LDH	84.886	51579.6	7408.66	GST	77.519	287621	8972.17	SOD3.1	84.888	42664.1	2124.78	ACPB
84.728	266168	49241.1	LDH	84.886	64737.9	7012.31	GST	77.826	284127	8976.55	SOD3.1	84.888	53664.1	2035.66	ACPB
84.728	271201	50094.8	LDH	84.886	54032.7	10584.9	GST	78.132	281303	9008.22	SOD3.1	84.888	47406.5	2593.01	ACPB
84.728	263678	51862.6	LDH	84.886	77447.2	8441.65	GST	78.439	279531	9059.28	SOD3.1	84.888	51291.7	3114.18	ACPB
84.734	264931	27997.5	LDH	84.893	56177	15252.5	GST	78.745	275544	9115.83	SOD3.1	84.89	49755.9	6229.1	ACPB
84.734	237341	37711.5	LDH	84.893	42450.6	9466.39	GST	79.052	273022	9166.49	SOD3.1	84.89	41869.9	3264.28	ACPB
85.031	260572	39774.1	LDH	85.193	30332.8	4821.79	GST	79.359	268399	9220.5	SOD3.1	85.195	37598.9	2101.68	ACPB
85.031	271214	34739.3	LDH	85.193	60438.6	9380.56	GST	79.665	266108	9329.17	SOD3.1	85.195	47012.7	2710.35	ACPB
85.031	235856	39963.9	LDH	85.193	45208.6	6322.63	GST	79.972	263924	9607.68	SOD3.1	85.195	36964.2	1661.09	ACPB
85.031	267270	51006.2	LDH	85.193	62578.1	5750.12	GST	80.278	260345	10259.3	SOD3.1	85.195	53608.7	1843.08	ACPB
85.031	301028	55922.7	LDH	85.193	49423.1	5031.24	GST	80.585	257114	11602.1	SOD3.1	85.195	48367.9	1720.39	ACPB
85.031	323697	74148.3	LDH	85.193	61574.8	5241.04	GST	80.892	254650	14084.2	SOD3.1	85.195	47054.3	793.947	ACPB
85.031	211738	50347.5	LDH	85.193	47682.5	5379.42	GST	81.198	251750	18253	SOD3.1	85.195	43464	1421.32	ACPB
85.031	255744	51977.2	LDH	85.193	53680.2	4327.11	GST	81.505	247696	24640.2	SOD3.1	85.195	51726.1	2711.89	ACPB
85.031	257504	53838.1	LDH	85.193	49960.9	4530.34	GST	81.811	245072	33543	SOD3.1	85.195	49909.1	2194.76	ACPB
85.031	277658	59687	LDH	85.193	62453.8	4829.55	GST	82.118	239110	44744.6	SOD3.1	85.195	53646.4	1103.32	ACPB
85.031	231843	52304.5	LDH	85.193	53010.8	4358.44	GST	82.425	229845	57283.7	SOD3.1	85.195	43397.4	2137.87	ACPB
85.031	261191	61022.2	LDH	85.193	62422.2	3829.64	GST	82.731	214612	69429.1	SOD3.1	85.195	56402.7	1804.18	ACPB
85.031	258058	61287.9	LDH	85.193	50991	4481.61	GST	83.038	187045	78974.3	SOD3.1	85.195	42120.9	1762.76	ACPB
85.031	251027	61914.4	LDH	85.193	63312.7	4201.34	GST	83.344	150019	83830.3	SOD3.1	85.195	53602.5	1777.99	ACPB
85.031	258041	63019.7	LDH	85.193	53754.9	6241.07	GST	83.651	109590	82713.8	SOD3.1	85.195	47231.6	1660.48	ACPB
85.031	246936	64184.9	LDH	85.193	76933.2	4940.16	GST	83.957	79522.3	75630.7	SOD3.1	85.195	50805.6	2416	ACPB
85.037	257097	36924.4	LDH	85.2	55488.6	8392.35	GST	84.264	60185.9	63909.1	SOD3.1	85.197	49419.3	3345.62	ACPB
85.037	228145	48606.6	LDH	85.2	41660.9	5219.11	GST	84.571	53713.5	49753.2	SOD3.1	85.197	42958.7	1855.82	ACPB
85.334	251870	52479.1	LDH	85.5	29951.2	2458.74	GST	84.877	51705.8	35526.4	SOD3.1	85.502	37168.7	886.307	ACPB
85.334	264169	45933.8	LDH	85.5	59585.8	5504.91	GST	85.184	51472.7	23087.3	SOD3.1	85.502	46720.4	1440.77	ACPB
85.334	224175	50755.8	LDH	85.5	45299.3	3658.34	GST	85.49	51039.2	13431.7	SOD3.1	85.502	37138.1	936.433	ACPB
85.334	254082	64359.6	LDH	85.5	63177.8	3312.69	GST	85.797	51003.7	7214.59	SOD3.1	85.502	52376.6	1083.12	ACPB
85.334	284730	70765.2	LDH	85.5	49365.4	2989.17	GST	86.104	50114.7	3966.6	SOD3.1	85.502	48878.3	986.821	ACPB
85.334	297029	91374.4	LDH	85.5	60694.6	3142.18	GST	86.41	50014.5	2116.46	SOD3.1	85.502	47935	713.56	ACPB
85.334	192192	61154.3	LDH	85.5	47199.5	3310.68	GST	86.717	50289.8	1166.72	SOD3.1	85.502	42504.9	932.548	ACPB
85.334	237857	64435.6	LDH	85.5	52737.3	2613.52	GST	87.023	49847.1	738.741	SOD3.1	85.502	50920.4	2389.63	ACPB
85.334	239358	66054	LDH	85.5	48456.4	2673.91	GST	87.33	49508.4	585.892	SOD3.1	85.502	49912.7	2016.23	ACPB
85.334	257506	74387.9	LDH	85.5	62317.3	2895.02	GST	87.637	49495	562.738	SOD3.1	85.502	53812.3	1032.38	ACPB
85.334	212926	65043.6	LDH	85.5	52674.5	2468.89	GST	87.943	48650.5	586.991	SOD3.1	85.502	43348.5	1865.8	ACPB
85.334	238458	74146.3	LDH	85.5	61744.4	2101.07	GST	88.25	48514.6	612.113	SOD3.1	85.502	56596.9	1662.22	ACPB
85.334	233368	74382.3	LDH	85.5	50237.4	2748.74	GST	88.556	48334.3	612.867	SOD3.1	85.502	42114.2	1578.64	ACPB
85.334	227582	74765.1	LDH	85.5	62379.8	2579.97	GST	88.863	47503.7	579.193	SOD3.1	85.502	52535	1666.12	ACPB
85.334	233843	76258	LDH	85.5	52112	3899.44	GST	89.17	47576.2	513.575	SOD3.1	85.502	45700.7	1187.19	ACPB
85.334	220352	76111.9	LDH	85.5	76676.2	2862.51	GST	89.476	47289.7	428.921	SOD3.1	85.502	49622.7	2063.66	ACPB
85.341	246019	48281.5	LDH	85.507	54935.7	4919.59	GST	89.783	46987.9	345.085	SOD3.1	85.504	48195.3	1745.41	ACPB
85.341	211371	60834	LDH	85.507	42141.3	3010.13	GST	90.089	47068.6	282.944	SOD3.1	85.504	41831.7	1151.91	ACPB
85.637	236691	67319.2	LDH	85.807	30363	1115.35	GST	90.396	47050	257.061	SOD3.1	85.809	37319.1	349.091	ACPB
85.637	251391	59749.8	LDH	85.807	59181.1	3278.6	GST	90.703	47061.9	269.831	SOD3.1	85.809	46188	790.248	ACPB
85.637	203142	62124.6	LDH	85.807	44353.4	2098.01	GST	91.009	46681.4	311.09	SOD3.1	85.809	37509.8	558.237	ACPB
85.637	228149	78133.4	LDH	85.807	62483	2007.66	GST	91.316	45710.5	364.135	SOD3.1	85.809	52144.8	717.603	ACPB
85.637	256356	86103.2	LDH	85.807	48854.4	1877	GST	91.622	45815.5	414.577	SOD3.1	85.809	48223.4	648.622	ACPB
85.637	252453	107254	LDH	85.807	60229.9	2027.79	GST	91.929	45563.1	455.595	SOD3.1	85.809	47578.5	649.657	ACPB
85.637	159772	70597.6	LDH	85.807	47228.5	2140.26	GST	92.236	46291.2	486.371	SOD3.1	85.809	42063.8	735.71	ACPB
85.637	205556	76345.2	LDH	85.807	52553.4	1705.42	GST	92.542	44574.4	506.912	SOD3.1	85.809	51001.4	2232.78	ACPB
85.637	206816	77343.8	LDH	85.807	48577.2	1654.74	GST	92.849	44452.2	515.33	SOD3.1	85.809	49298.2	1965.73	ACPB
85.637	227276	88705.7	LDH	85.807	61380.7	1909.92	GST	93.155	44653.1	510.288	SOD3.1	85.809	53352.7	998.547	ACPB
85.637	179702	76760	LDH	85.807	53633.2	1429.33	GST	93.462	44069.1	495.294	SOD3.1	85.809	43276.7	1765.28	ACPB
85.637	202611	85872.7	LDH	85.807	62125.4	1192.3	GST	93.769	44129	479.68	SOD3.1	85.809	55530.2	1606.97	ACPB
85.637	193648	85790.4	LDH	85.807	50210	1791.82	GST	94.075	43627.4	474.677	SOD3.1	85.809	42065.8	1494.11	ACPB
85.637	190773	85909	LDH	85.807	62661.9	1703.63	GST	94.382	43765.7	487.668	SOD3.1	85.809	52886	1621.46	ACPB
85.637	194986	87787.2	LDH	85.807	51976.8	2452.08	GST	94.688	43409.9	518.893	SOD3.1	85.809	46309.7	944.039	ACPB
85.637	181857	85719.3	LDH	85.807	75790.8	1719.3	GST	72	377911	7622.98	SOD3.1	85.809	50785.8	1906.63	ACPB
85.644	231089	61480.9	LDH	85.814	54433.6	2923.28	GST	72.306	377362	7838.99	SOD3.1	85.811	48420.5	924.938	ACPB
85.644	186573	72967	LDH	85.814	41572.9	1745.04	GST	72.613	374367	8074.79	SOD3.1	85.811	41687.8	820.272	ACPB
85.94	209067	82508.6	LDH	86.113	30492	417.038	GST	72.92	372357	8327.56	SOD3.1	86.116	37235.1	172.76	ACPB
85.94	231029	74882.9	LDH	86.113	57940.6	2048.78	GST	73.226	368873	8593.9	SOD3.1	86.116	46479.6	486.888	ACPB
85.94	167635	72227.2	LDH	86.113	44002.3	1262.05	GST	73.533	366966	8867.47	SOD3.1	86.116	36675	368.347	ACPB
85.94	185304	89993.2	LDH	86.113	62125.4	1391.61	GST	73.84	363983	9137.39	SOD3.1	86.116	52004.2	542.816	ACPB
85.94	208154	99405	LDH	86.113	48977.8	1337.29	GST	74.146	361319	9395.63	SOD3.1	86.116	48914.7	524.065	ACPB
85.94	190856	118724	LDH	86.113	60176.5	1495.91	GST	74.453	357276	9708.04	SOD3.1	86.116	47713.3	608.939	ACPB
85.94	118742	76768.3	LDH	86.113	46256.5	1521.61	GST	74.76	353992	9966.97	SOD3.1	86.116	41762.6	669.347	ACPB
85.94	157628	85483	LDH	86.113	51938.7	1267.59	GST	75.067	351442	10174.5	SOD3.1	86.116	50269.7	2152.8	ACPB
85.94	162469	85516.2	LDH	86.113	47777.2	1138.27	GST	75.373	348337	10340.3	SOD3.1	86.116	48515.8	1966.26	ACPB
85.94	181660	100224	LDH	86.113	61180.7	1474.59	GST	75.68	344919	10476.7	SOD3.1	86.116	53109.5	983.951	ACPB
85.94	137363	85269.9	LDH	86.113	52294.8	894.698	GST	75.987	340872	10595.1	SOD3.1	86.116	42684.5	1750.29	ACPB
85.94	155612	93930.7	LDH	86.113	60799.1	757.864	GST	76.293	338185	10704	SOD3.1	86.116	54943.4	1585.32	ACPB
85.94	144302	93196	LDH	86.113	48479.3	1291.73	GST	76.6	335233	10804.7	SOD3.1	86.116	42144.3	1464.9	ACPB
85.94	144318	93208.8	LDH	86.113	61597	1249.37	GST	76.907	331533	10887.4	SOD3.1	86.116	52175.1	1601.67	ACPB
85.94	144623	95282.4	LDH	86.113	50939.4	1577.79	GST	77.213	328506	10933.5	SOD3.1	86.116	45470.8	807.086	ACPB
85.94	133798	91003.8	LDH	86.113	76231.4	1144.07	GST	77.52	324590	10924.4	SOD3.1	86.116	50762.3	1860.65	ACPB
85.947	206854	75072.4	LDH	86.121	54158.7	1811.21	GST	77.827	321216	10853.3	SOD3.1	86.117	49306.1	541.117	ACPB
85.947	148417	82966.1	LDH	86.121	41663.6	1091.25	GST	78.133	317356	10732.6	SOD3.1	86.117	41151.1	648.63	ACPB
86.243	168006	95353.9	LDH	86.42	30451.8	97.454	GST	78.44	314344	10589.4	SOD3.1	86.423	36417.8	160.175	ACPB
86.243	193566	88972.3	LDH	86.42	57719	1410.23	GST	78.747	311811	10457.1	SOD3.1	86.423	46891.6	372.84	ACPB
86.243	126095	78885.1	LDH	86.42	44359.2	852.522	GST	79.053	308270	10367.7	SOD3.1	86.423	37272	275.846	ACPB
86.243	137425	97285.2	LDH	86.42	61160.5	1132.82	GST	79.36	304537	10351.5	SOD3.1	86.423	51415.5	457.806	ACPB
86.243	154394	107778	LDH	86.42	48030.9	1111.23	GST	79.667	301404	10445.3	SOD3.1	86.423	47842.4	504.376	ACPB
86.243	134736	122973	LDH	86.42	59030.9	1273.86	GST	79.973	299381	10708	SOD3.1	86.423	46903.7	576.239	ACPB
86.243	84008.8	78067	LDH	86.42	46006	1202.56	GST	80.28	295284	11246.3	SOD3.1	86.423	42019.8	647.776	ACPB
86.243	112483	89674	LDH	86.42	51664.4	1068.79	GST	80.587	292853	12254.7	SOD3.1	86.423	50827.6	2106.67	ACPB
86.243	121244	88542.5	LDH	86.42	47570.6	889.306	GST	80.894	288506	14064.6	SOD3.1	86.423	48081.6	1977.91	ACPB
86.243	133087	106417	LDH	86.42	59855.8	1302.98	GST	81.2	285365	17177	SOD3.1	86.423	52765.6	980.417	ACPB
86.243	99517.5	88605.5	LDH	86.42	51658.6	630.027	GST	81.507	282171	22234.7	SOD3.1	86.423	42258.9	1770.98	ACPB
86.243	111465	96310.5	LDH	86.42	59908.5	566.411	GST	81.814	277974	29888.1	SOD3.1	86.423	55172	1575.89	ACPB
86.243	101740	94683.6	LDH	86.42	49621.4	1026.24	GST	82.12	273525	40537.1	SOD3.1	86.423	41817.4	1463.45	ACPB
86.243	102871	94862.2	LDH	86.42	62184.8	1019.24	GST	82.427	267838	53998	SOD3.1	86.423	51456.7	1587.52	ACPB
86.243	101869	96794.2	LDH	86.42	51320.5	1043.21	GST	82.734	257643	69224	SOD3.1	86.423	45543.5	722.903	ACPB
86.243	94443.8	90481.2	LDH	86.42	75757.9	897.49	GST	83.04	239011	84255.8	SOD3.1	86.423	50207.1	1873.38	ACPB
86.25	169267	86828.1	LDH	86.428	54126.4	1235.67	GST	83.347	208425	96529.4	SOD3.1	86.424	48070.2	383.174	ACPB
86.25	107315	88638.3	LDH	86.428	40975.2	791.958	GST	83.654	167347	103525	SOD3.1	86.424	40262.5	521.236	ACPB
86.547	124361	102957	LDH	86.727	29256.9	-15.351	GST	83.96	125757	103549	SOD3.1	86.729	35975.9	202.249	ACPB
86.547	150206	99094.7	LDH	86.727	57433.7	1084.12	GST	84.267	89364.2	96323.1	SOD3.1	86.729	46418.1	360.188	ACPB
86.547	89892.8	80292.1	LDH	86.727	43347.3	673.845	GST	84.574	65378.2	83113.4	SOD3.1	86.729	35784.9	229.543	ACPB
86.547	97941.6	97928.7	LDH	86.727	60138	1019.95	GST	84.88	51625.3	66327.7	SOD3.1	86.729	52215.1	421.334	ACPB
86.547	109395	108919	LDH	86.727	48042.7	1033.5	GST	85.187	49063.6	48758.9	SOD3.1	86.729	47827.9	523.057	ACPB
86.547	95025.8	118465	LDH	86.727	59858.5	1199.53	GST	85.494	48547.7	32801.4	SOD3.1	86.729	46184.1	529.689	ACPB
86.547	59398.1	73816.3	LDH	86.727	45211.8	1026.39	GST	85.8	48146.9	19940	SOD3.1	86.729	41189	631.292	ACPB
86.547	79398.5	87571.4	LDH	86.727	51386.5	971.784	GST	86.107	47539.7	10640	SOD3.1	86.729	50219.7	2074.31	ACPB
86.547	92330.9	85302	LDH	86.727	46998.7	768.38	GST	86.414	47892.7	5988.19	SOD3.1	86.729	49021	1983.68	ACPB
86.547	95503.6	105483	LDH	86.727	59266.2	1220.61	GST	86.72	47446.4	3463.06	SOD3.1	86.729	52834.2	984.225	ACPB
86.547	71361.2	85702.3	LDH	86.727	51758	499.467	GST	87.027	46677.9	2113.05	SOD3.1	86.729	42450.1	1798.41	ACPB
86.547	81434.4	91999	LDH	86.727	60507.2	484.963	GST	87.334	46867.1	1458.69	SOD3.1	86.729	55725.2	1573.71	ACPB
86.547	73245	89462.5	LDH	86.727	48331.2	863.902	GST	87.641	46274.8	1170.86	SOD3.1	86.729	41308.1	1470.78	ACPB
86.547	74646.5	90059.7	LDH	86.727	61895.8	905.18	GST	87.947	45952.3	1056.19	SOD3.1	86.729	51538.7	1573.39	ACPB
86.547	71957.8	91487.3	LDH	86.727	50482.7	706.803	GST	88.254	46310.8	1015.07	SOD3.1	86.729	45728.2	674.663	ACPB
86.547	70314	83774.7	LDH	86.727	74853	833.035	GST	88.561	45324.1	1000.29	SOD3.1	86.729	49008.6	1903.9	ACPB
86.553	129123	94248.5	LDH	86.735	53871.1	958.875	GST	88.867	45178.2	989.239	SOD3.1	86.731	47879.1	331.541	ACPB
86.553	73162.5	88357.5	LDH	86.735	40951.9	676.848	GST	89.174	45116.3	971.029	SOD3.1	86.731	40325.9	392.666	ACPB
86.85	87331.7	103221	LDH	87.034	28674.4	-24.966	GST	89.481	44527.4	943.416	SOD3.1	87.036	35850.3	247.476	ACPB
86.85	108470	102689	LDH	87.034	57811.8	910.221	GST	89.787	43986.9	912.004	SOD3.1	87.036	45561.6	395.673	ACPB
86.85	65625	75734.1	LDH	87.034	43763.3	614.056	GST	90.094	44488.5	887.017	SOD3.1	87.036	36549.4	202.063	ACPB
86.85	72672.1	91267.7	LDH	87.034	60595.4	942.825	GST	90.401	44448.4	877.009	SOD3.1	87.036	51142.4	416.125	ACPB
86.85	78682.5	102040	LDH	87.034	47365.9	1010.4	GST	90.707	43680.2	883.473	SOD3.1	87.036	47005.6	540.903	ACPB
86.85	73140.7	105640	LDH	87.034	58706.7	1184.05	GST	91.014	43248.4	900.076	SOD3.1	87.036	46474.8	461.966	ACPB
86.85	49531.3	64604.4	LDH	87.034	46126.1	911.493	GST	91.321	42973.7	916.698	SOD3.1	87.036	40865.5	604.328	ACPB
86.85	59517	79242.1	LDH	87.034	50525.6	909.158	GST	91.627	43205.5	924.285	SOD3.1	87.036	49562.9	2046.21	ACPB
86.85	76759	76094.2	LDH	87.034	47047.4	707.301	GST	91.934	42627.7	916.881	SOD3.1	87.036	47401.4	1978.67	ACPB
86.85	69559	97093.2	LDH	87.034	59373.7	1143.69	GST	92.241	42217.9	890.858	SOD3.1	87.036	52865.2	992.963	ACPB
86.85	54261.1	76854.9	LDH	87.034	51446.8	438.989	GST	92.547	42010.1	844.646	SOD3.1	87.036	42032.3	1816.2	ACPB
86.85	65654.2	81466	LDH	87.034	60924	450.283	GST	92.854	41805.8	780.521	SOD3.1	87.036	54716	1578.82	ACPB
86.85	59682.6	78262.2	LDH	87.034	48407.2	740.628	GST	93.161	41291.1	706.716	SOD3.1	87.036	40546.7	1475.9	ACPB
86.85	59073.2	79386.7	LDH	87.034	60638.2	850.304	GST	93.468	42176.4	636.45	SOD3.1	87.036	51387.8	1560.64	ACPB
86.85	58624.2	80066.1	LDH	87.034	50751.4	496.381	GST	93.774	41205.5	583.023	SOD3.1	87.036	45125.4	658.413	ACPB
86.85	60003.3	71881.8	LDH	87.034	75532.5	858.065	GST	94.081	41546.8	553.588	SOD3.1	87.036	49615.8	1919.66	ACPB
86.856	91888.1	95375.2	LDH	87.042	53450.1	838.846	GST	94.388	41633.6	545.827	SOD3.1	87.038	47572.8	321.166	ACPB
86.856	52231.2	81731.5	LDH	87.042	40523.9	647.343	GST	94.694	40673.6	549.789	SOD3.1	87.038	40161	263.79	ACPB
87.153	64153	95694.7	LDH	87.341	29397.6	10.726	GST	72	355324	7639.77	RBOHF	87.343	35706.1	277.611	ACPB
87.153	77756.6	98523	LDH	87.341	56294.8	809.986	GST	72.306	354208	7787.93	RBOHF	87.343	45456.2	443.521	ACPB
87.153	55587.6	65935.4	LDH	87.341	43232.9	612.859	GST	72.612	352007	7963.31	RBOHF	87.343	36518	182.246	ACPB
87.153	62689.1	78416.3	LDH	87.341	59974.1	862.707	GST	72.919	349579	8220.07	RBOHF	87.343	51390.8	428.283	ACPB
87.153	66607	88270.4	LDH	87.341	47179.3	997.113	GST	73.225	346617	8514.47	RBOHF	87.343	46572.8	540.439	ACPB
87.153	66757.2	86863.9	LDH	87.341	57778.8	1178.92	GST	73.531	344273	8814.48	RBOHF	87.343	46547.9	389.37	ACPB
87.153	46089.2	52142.4	LDH	87.341	45025.7	825.436	GST	73.838	341299	9101.36	RBOHF	87.343	40920.6	562.845	ACPB
87.153	54288.1	66220.6	LDH	87.341	50867.9	858.366	GST	74.144	338200	9355.28	RBOHF	87.343	49639	2019.09	ACPB
87.153	72326.9	62612.2	LDH	87.341	46820.8	679.687	GST	74.45	335351	9560.36	RBOHF	87.343	47506.2	1963.24	ACPB
87.153	59580.8	82632.5	LDH	87.341	58852.9	1049.86	GST	74.756	332122	9709.69	RBOHF	87.343	51999.7	1003.85	ACPB
87.153	48298	63683.2	LDH	87.341	52239.9	424.894	GST	75.063	328984	9807.24	RBOHF	87.343	41378.5	1817.16	ACPB
87.153	60356.5	66598.8	LDH	87.341	59675.3	439.056	GST	75.369	325861	9865.78	RBOHF	87.343	54244.7	1590.63	ACPB
87.153	56263.6	63151.9	LDH	87.341	47697.9	633.937	GST	75.675	322975	9901.32	RBOHF	87.343	40380.1	1476.45	ACPB
87.153	53994.1	64715.2	LDH	87.341	60879	824.504	GST	75.982	320203	9928.35	RBOHF	87.343	51371.8	1552.55	ACPB
87.153	54622.7	64616.9	LDH	87.341	50845.3	378.131	GST	76.288	316700	9958.2	RBOHF	87.343	44799	670.737	ACPB
87.153	57152.8	56921.6	LDH	87.341	74412.8	909.074	GST	76.594	313950	10000.6	RBOHF	87.343	48188.7	1902.91	ACPB
87.16	67283.7	89551.6	LDH	87.349	53021.7	797.896	GST	76.901	310466	10066	RBOHF	87.345	47579.1	320.431	ACPB
87.16	43226.3	69849	LDH	87.349	40146.3	653.294	GST	77.207	307576	10167	RBOHF	87.345	40052.9	158.125	ACPB
87.456	54944.7	81793.8	LDH	87.647	29390.2	60.207	GST	77.513	305241	10321.5	RBOHF	87.65	35481.6	289.11	ACPB
87.456	62970.2	87215.7	LDH	87.647	56994.7	747.773	GST	77.819	301180	10561.9	RBOHF	87.65	45224.2	480.973	ACPB
87.456	52418.9	52825.2	LDH	87.647	42990.6	634.825	GST	78.126	298294	10954.1	RBOHF	87.65	35357	169.626	ACPB
87.456	60506	61881.6	LDH	87.647	59852.3	781.581	GST	78.432	294956	11625.5	RBOHF	87.65	50754	442.311	ACPB
87.456	62984.5	70293.9	LDH	87.647	46427.8	978.972	GST	78.738	292028	12799.2	RBOHF	87.65	47032	520.794	ACPB
87.456	65696.6	65622	LDH	87.647	57957.2	1157.31	GST	79.045	288304	14822.2	RBOHF	87.65	46197.2	341.948	ACPB
87.456	45061.1	38678.8	LDH	87.647	44659.9	762.143	GST	79.351	285361	18172.1	RBOHF	87.65	40472.2	508.922	ACPB
87.456	51742.7	50973.7	LDH	87.647	49961.7	820.671	GST	79.657	281284	23409.7	RBOHF	87.65	49266.1	1995.07	ACPB
87.456	70790.6	47359	LDH	87.647	45921	675.207	GST	79.963	277488	31048.1	RBOHF	87.65	47131.1	1940.21	ACPB
87.456	56791.8	64765.1	LDH	87.647	58566.4	947.411	GST	80.27	272688	41331.9	RBOHF	87.65	52250.8	1013.49	ACPB
87.456	46942.8	48592.6	LDH	87.647	51315.9	446.01	GST	80.576	266293	53973.9	RBOHF	87.65	41047.8	1802.12	ACPB
87.456	59283.1	50075.6	LDH	87.647	58710.2	445.262	GST	80.882	256242	67958.5	RBOHF	87.65	53587.3	1607.15	ACPB
87.456	54905.5	46840.8	LDH	87.647	48278.8	542.424	GST	81.189	239333	81542.8	RBOHF	87.65	41392.2	1476	ACPB
87.456	53005.4	48595.8	LDH	87.647	60415.5	814.578	GST	81.495	211214	92539.7	RBOHF	87.65	50894.3	1550.81	ACPB
87.456	54351.5	47904.5	LDH	87.647	49857.4	330.251	GST	81.801	176031	98846.7	RBOHF	87.65	44900.7	704.387	ACPB
87.456	57901.6	41441.9	LDH	87.647	72645.8	944.027	GST	82.108	138708	99053.2	RBOHF	87.65	48419.9	1855.49	ACPB
87.463	56066.8	77739.1	LDH	87.656	53145	794.887	GST	82.414	103609	92894.3	RBOHF	87.652	46894.5	320.202	ACPB
87.463	41487.2	54937.4	LDH	87.656	40640.9	670.785	GST	82.72	76270.9	81358.1	RBOHF	87.652	40322.4	99.28	ACPB
87.759	52679.2	64286.1	LDH	87.954	28715.7	101.899	GST	83.026	59019	66395.8	RBOHF	87.957	34499.4	281.021	ACPB
87.759	58023	71031.3	LDH	87.954	55947.7	705.38	GST	83.333	51891.8	50352.2	RBOHF	87.957	45351.4	497.407	ACPB
87.759	52660.8	38839	LDH	87.954	42333.1	655.668	GST	83.639	49925.4	35340.9	RBOHF	87.957	36138.1	168.228	ACPB
87.759	59351	44660.3	LDH	87.954	59191.8	716.953	GST	83.945	48631.3	22793.1	RBOHF	87.957	50147	446.071	ACPB
87.759	62451.9	51386.6	LDH	87.954	47314.6	957.278	GST	84.252	48561.9	13304.9	RBOHF	87.957	46889.7	489.471	ACPB
87.759	64214.6	45346.5	LDH	87.954	57374.4	1107.62	GST	84.558	47591.5	7101.88	RBOHF	87.957	46402.7	344.141	ACPB
87.759	45240.6	26263.2	LDH	87.954	44983	725.938	GST	84.864	46740.7	4091.38	RBOHF	87.957	40272.6	449.256	ACPB
87.759	51278.3	36050.7	LDH	87.954	50466.5	803.788	GST	85.171	47410.7	2332.44	RBOHF	87.957	49719.7	1980.02	ACPB
87.759	69592.4	32803.3	LDH	87.954	46728.2	682.322	GST	85.477	46633	1372.04	RBOHF	87.957	46476	1914.08	ACPB
87.759	55580	46531.4	LDH	87.954	58143.7	850.676	GST	85.783	46846.6	867.438	RBOHF	87.957	51154.7	1018.84	ACPB
87.759	45756.2	33991.4	LDH	87.954	50514.1	487.335	GST	86.089	45471.4	594.808	RBOHF	87.957	40908	1778.48	ACPB
87.759	59695.5	34483.4	LDH	87.954	59544.1	468.037	GST	86.396	45587.1	429.227	RBOHF	87.957	54256.6	1625.93	ACPB
87.759	54766.7	31804.9	LDH	87.954	47968.9	472.355	GST	86.702	46103.5	315.287	RBOHF	87.957	40877.7	1478.39	ACPB
87.759	51749.4	33443.2	LDH	87.954	60136.2	819.768	GST	87.008	45456	237.63	RBOHF	87.957	50666.1	1554.2	ACPB
87.759	53353.1	32471.8	LDH	87.954	50801.1	328.871	GST	87.315	45799	196.613	RBOHF	87.957	44635.7	747.683	ACPB
87.759	56131	27621.5	LDH	87.954	72964.4	944.197	GST	87.621	45357.6	192.912	RBOHF	87.957	48569.7	1795.63	ACPB
87.766	52363.7	62202	LDH	87.963	52590.4	808.129	GST	87.927	45041.3	222.225	RBOHF	87.959	46715.2	324.756	ACPB
87.766	40390.7	39595.6	LDH	87.963	39835.9	686.27	GST	88.233	45131	276.205	RBOHF	87.959	40419.1	94.838	ACPB
88.062	50962.8	46303.9	LDH	88.261	27769.2	116.197	GST	88.54	45209.1	344.466	RBOHF	88.264	34774.4	250.643	ACPB
88.062	56957.2	53052.4	LDH	88.261	56085.4	672.083	GST	88.846	44023.3	414.643	RBOHF	88.264	44608.4	492.622	ACPB
88.062	51845	26118.2	LDH	88.261	41747.1	659.899	GST	89.152	45009	471.964	RBOHF	88.264	36070.8	180.603	ACPB
88.062	59795.7	29276.3	LDH	88.261	59052.2	684.983	GST	89.459	43761.7	501.537	RBOHF	88.264	49986.1	437.083	ACPB
88.062	61422.8	34363.1	LDH	88.261	45757	939.24	GST	89.765	43494.6	494.133	RBOHF	88.264	45607.9	454.171	ACPB
88.062	64423.9	28454.7	LDH	88.261	56594	1032.56	GST	90.071	42791.3	452.196	RBOHF	88.264	45520.3	400.375	ACPB
88.062	44438.6	16208.1	LDH	88.261	44553.7	721.483	GST	90.378	43577.9	390.788	RBOHF	88.264	40147.5	394.631	ACPB
88.062	50764.9	23339.8	LDH	88.261	50242.1	809.294	GST	90.684	43246.6	331.265	RBOHF	88.264	48977.9	1980.22	ACPB
88.062	69608.1	20683.9	LDH	88.261	45238	681.92	GST	90.99	42793.4	291.191	RBOHF	88.264	47177.9	1890.16	ACPB
88.062	55112.6	30422.3	LDH	88.261	58285.3	767.016	GST	91.296	43419.4	277.21	RBOHF	88.264	51457.2	1018.62	ACPB
88.062	45357.3	21630.6	LDH	88.261	50647.1	529.001	GST	91.603	41748	285.257	RBOHF	88.264	40910.8	1756.34	ACPB
88.062	58245.5	21603.8	LDH	88.261	58784.6	506.791	GST	91.909	42572.5	305.998	RBOHF	88.264	53477.3	1643.86	ACPB
88.062	53899.3	19645.3	LDH	88.261	47500.4	430.555	GST	92.215	42664	330.497	RBOHF	88.264	39764.7	1483.36	ACPB
88.062	51134.5	20901.1	LDH	88.261	60244.5	844.964	GST	92.522	41620.4	352.615	RBOHF	88.264	50364	1559.65	ACPB
88.062	52926.8	19969.2	LDH	88.261	49036.9	347.805	GST	92.828	41893.8	369.121	RBOHF	88.264	44329.3	785.774	ACPB
88.062	55893.6	16738.2	LDH	88.261	73321.9	913.682	GST	93.134	41060.2	379.55	RBOHF	88.264	48214.8	1747.57	ACPB
88.069	51236.7	45720.6	LDH	88.27	52117.6	827.012	GST	93.44	41400.9	386.204	RBOHF	88.266	47342.3	341.539	ACPB
88.069	40035.5	25985.4	LDH	88.27	38910.2	689.345	GST	93.747	41441.5	392.803	RBOHF	88.266	39893.7	132.358	ACPB
88.365	50870.6	30382	LDH	88.568	26966.5	89.979	GST	94.053	40621.9	401.875	RBOHF	88.571	34284.1	196.473	ACPB
88.365	56362.1	36158.1	LDH	88.568	54954.9	643.657	GST	94.359	40811.5	412.9	RBOHF	88.571	44043.3	474.37	ACPB
88.365	51538.9	15974.9	LDH	88.568	41641.6	642.883	GST	94.666	40194	423.016	RBOHF	88.571	35261.8	204.629	ACPB
88.365	58438.1	17190.6	LDH	88.568	59435.9	691.542	GST	72	408235	8601.8	RBOHF	88.571	49937.8	422.933	ACPB
88.365	61228.4	20897.5	LDH	88.568	45852.3	931.608	GST	72.306	407133	8825.63	RBOHF	88.571	46374.4	418.897	ACPB
88.365	64231.8	15961.4	LDH	88.568	56867.9	946.659	GST	72.612	404228	9079.05	RBOHF	88.571	46001.2	493.84	ACPB
88.365	44013.8	8983.25	LDH	88.568	44614	748.004	GST	72.919	401273	9408.02	RBOHF	88.571	39775.2	358.077	ACPB
88.365	50240.8	13728.8	LDH	88.568	49485.9	827.841	GST	73.225	398518	9803.52	RBOHF	88.571	49169.3	1998.67	ACPB
88.365	69432.8	11730.4	LDH	88.568	45508.5	652.044	GST	73.531	395660	10207.8	RBOHF	88.571	46119.6	1872.52	ACPB
88.365	55061	17833	LDH	88.568	57244.8	695.843	GST	73.838	392272	10592.2	RBOHF	88.571	50655.1	1014	ACPB
88.365	45232.6	12315.4	LDH	88.568	49787.8	555.624	GST	74.144	388508	10923.9	RBOHF	88.571	40960.8	1742.64	ACPB
88.365	57895.8	12142.5	LDH	88.568	58908.1	557.688	GST	74.45	385284	11178.4	RBOHF	88.571	53598.8	1656.14	ACPB
88.365	53957	10948.4	LDH	88.568	47179.1	422.086	GST	74.756	381498	11351.1	RBOHF	88.571	39656.4	1486.52	ACPB
88.365	50219.6	11619.8	LDH	88.568	60042.3	891.667	GST	75.063	377081	11461.2	RBOHF	88.571	49773.1	1564.44	ACPB
88.365	53096.6	11065.9	LDH	88.568	49094.9	367.18	GST	75.369	374562	11543.8	RBOHF	88.571	43596.7	804.033	ACPB
88.365	55566.3	9517.87	LDH	88.568	72714.4	870.386	GST	75.675	370908	11634.1	RBOHF	88.571	48315.1	1729.46	ACPB
88.372	50860.9	30718.5	LDH	88.577	51828.2	848.145	GST	75.982	367325	11751.8	RBOHF	88.573	46408.1	372.37	ACPB
88.372	39955	15338.6	LDH	88.577	39071.9	672.718	GST	76.288	364014	11894.3	RBOHF	88.573	39111	187.783	ACPB
88.668	49233.9	17919.3	LDH	88.875	27301.6	27.056	GST	76.594	360536	12043	RBOHF	88.878	33993.1	124.095	ACPB
88.668	55659.9	22270.3	LDH	88.875	55648.2	622.537	GST	76.901	355875	12176.5	RBOHF	88.878	43942.7	455.515	ACPB
88.668	51190.9	8911.22	LDH	88.875	42061.7	610.496	GST	77.207	352907	12287.8	RBOHF	88.878	35120.7	233.928	ACPB
88.668	58507.3	9244.74	LDH	88.875	58292.4	729.003	GST	77.513	348957	12398.1	RBOHF	88.878	50175	414.708	ACPB
88.668	60747.9	11657.2	LDH	88.875	45807.7	936.961	GST	77.819	344496	12563.7	RBOHF	88.878	45805.5	385.145	ACPB
88.668	63138.1	8879.21	LDH	88.875	56541.1	869.979	GST	78.126	341400	12881.3	RBOHF	88.878	45666.8	595.363	ACPB
88.668	43272.1	4903.35	LDH	88.875	44173.3	796.938	GST	78.432	337508	13495	RBOHF	88.878	40287.1	350.944	ACPB
88.668	50004.4	7658.38	LDH	88.875	48650.5	844.06	GST	78.738	334843	14615.4	RBOHF	88.878	48496.7	2032.74	ACPB
88.668	68375.8	6955.36	LDH	88.875	43855.1	579.842	GST	79.045	329870	16550	RBOHF	88.878	46597.9	1861.84	ACPB
88.668	54479.7	9725.86	LDH	88.875	57299.7	634.856	GST	79.351	325731	19730.6	RBOHF	88.878	50839.9	1008.01	ACPB
88.668	45303.3	6781.2	LDH	88.875	49929.4	564.831	GST	79.657	322006	24702.8	RBOHF	88.878	40497.4	1736.59	ACPB
88.668	57735.4	6952.19	LDH	88.875	58016.3	609.885	GST	79.963	316779	32036.4	RBOHF	88.878	52050.8	1656.43	ACPB
88.668	54010.6	6197.03	LDH	88.875	47598.5	449.831	GST	80.27	311620	42132.1	RBOHF	88.878	40034.9	1482.94	ACPB
88.668	51180.9	6398.8	LDH	88.875	59156.9	952.364	GST	80.576	304365	54948.3	RBOHF	88.878	49849.6	1567.75	ACPB
88.668	51788.3	6176.93	LDH	88.875	48791.4	382.041	GST	80.882	294385	69737.6	RBOHF	88.878	43274.6	793.313	ACPB
88.668	54820.6	5331.87	LDH	88.875	71831.5	831.557	GST	81.189	278534	84930.6	RBOHF	88.878	48477.4	1745.47	ACPB
88.676	50674.3	18686	LDH	88.884	51801.1	872.208	GST	81.495	251870	98296	RBOHF	88.879	46115.1	410.161	ACPB
88.676	40197.5	8362.2	LDH	88.884	39305.5	634.862	GST	81.801	214539	107410	RBOHF	88.879	38854.2	239.257	ACPB
88.971	49669	9424.64	LDH	89.181	27531.7	-49.278	GST	82.108	171960	110319	RBOHF	89.184	33325	48.981	ACPB
88.971	54869.1	12116.7	LDH	89.181	55250.3	614.796	GST	82.414	127182	106162	RBOHF	89.184	44411.5	449.467	ACPB
88.971	50838.1	4940.5	LDH	89.181	40861.3	573.909	GST	82.72	92871.1	95478.8	RBOHF	89.184	35226	260.691	ACPB
88.971	59018.7	4919.41	LDH	89.181	58605.2	777.63	GST	83.026	68715.6	80071.8	RBOHF	89.184	49451.7	418.249	ACPB
88.971	60347.1	6735.17	LDH	89.181	45719.9	951.613	GST	83.333	56806.6	62462.3	RBOHF	89.184	45099.9	355.014	ACPB
88.971	62988.4	4854.79	LDH	89.181	56616.9	820.002	GST	83.639	53111.6	45172.4	RBOHF	89.184	44801.3	676.1	ACPB
88.971	42983.3	2474.82	LDH	89.181	43448.3	853.796	GST	83.945	52122	30115.3	RBOHF	89.184	39646.5	377.582	ACPB
88.971	49402.8	4125.64	LDH	89.181	48237.9	847.144	GST	84.252	51082.5	18295.6	RBOHF	89.184	48809.1	2074.17	ACPB
88.971	67869.7	4112.98	LDH	89.181	44756.9	472.519	GST	84.558	50100.8	9852.95	RBOHF	89.184	45606.7	1854.96	ACPB
88.971	54306.6	5496.15	LDH	89.181	56951.1	586.149	GST	84.864	49760.2	5487.4	RBOHF	89.184	50985.7	1003.79	ACPB
88.971	44417.3	3681.1	LDH	89.181	49737.8	566.222	GST	85.171	50226.6	2967.01	RBOHF	89.184	40250.8	1729.73	ACPB
88.971	57242.5	3873.79	LDH	89.181	57611.2	645.091	GST	85.477	49881.2	1596.27	RBOHF	89.184	52092.3	1639.81	ACPB
88.971	53215	3441.26	LDH	89.181	46730.6	513.099	GST	85.783	50023.9	934.741	RBOHF	89.184	39269.6	1470.94	ACPB
88.971	50920.6	3274.05	LDH	89.181	58428.1	1012.52	GST	86.089	49617.1	668.679	RBOHF	89.184	49566.8	1570.55	ACPB
88.971	52166.4	3310.48	LDH	89.181	48927.6	402.482	GST	86.396	48589.4	594.959	RBOHF	89.184	43672.4	754.781	ACPB
88.971	54690.4	2896.69	LDH	89.181	71636.1	803.194	GST	86.702	49012.7	593.854	RBOHF	89.184	47749.7	1784.96	ACPB
88.979	49737.5	10100	LDH	89.191	51639.2	900.484	GST	87.008	48464.3	604.116	RBOHF	89.186	45829.6	441.918	ACPB
88.979	38553.6	4701.1	LDH	89.191	38583.8	580.79	GST	87.315	47829.4	602.753	RBOHF	89.186	39324.4	276.538	ACPB
89.274	49330.8	5306.56	LDH	89.488	27397.5	-109.173	GST	87.621	48005.7	588.497	RBOHF	89.491	33540	-7.962	ACPB
89.274	55426.1	6619.7	LDH	89.488	54288.7	624.592	GST	87.927	47454.3	568.673	RBOHF	89.491	43756.6	463.926	ACPB
89.274	50781.7	2679.39	LDH	89.488	41029.2	542.182	GST	88.233	47721.6	550.078	RBOHF	89.491	34929	278.494	ACPB
89.274	58669.8	2503.21	LDH	89.488	56915.6	811.18	GST	88.54	46949.2	534.949	RBOHF	89.491	49381.8	429.762	ACPB
89.274	59411.4	3911.91	LDH	89.488	44710.1	965.369	GST	88.846	46965.2	522.09	RBOHF	89.491	45672.6	332.516	ACPB
89.274	62367	2657.5	LDH	89.488	55856.7	805.599	GST	89.152	46349.8	510.977	RBOHF	89.491	44744.9	717.945	ACPB
89.274	43597	1149.04	LDH	89.488	43070.3	903.667	GST	89.459	46128.1	504.76	RBOHF	89.491	40005.3	431.661	ACPB
89.274	50459.2	2164.59	LDH	89.488	48786.4	838.322	GST	89.765	46431.9	508.729	RBOHF	89.491	48398.2	2111.32	ACPB
89.274	67374	2563.88	LDH	89.488	44187.2	358.363	GST	90.071	46178	524.765	RBOHF	89.491	46064.7	1846.46	ACPB
89.274	53790.4	3084.3	LDH	89.488	57023.1	556.774	GST	90.378	45657.3	546.43	RBOHF	89.491	50182.3	1002.88	ACPB
89.274	44703.3	1961.06	LDH	89.488	49610.8	571.588	GST	90.684	44911.7	559.899	RBOHF	89.491	39612.9	1711.43	ACPB
89.274	56804.1	2185.11	LDH	89.488	56958.8	643.839	GST	90.99	45376.2	551.577	RBOHF	89.491	52194	1606.3	ACPB
89.274	52332.7	1993.45	LDH	89.488	47588.9	604.151	GST	91.296	44242.8	517.897	RBOHF	89.491	39344.8	1453.31	ACPB
89.274	50309.8	1573.65	LDH	89.488	58029.3	1057.85	GST	91.603	43904	469.999	RBOHF	89.491	49329.4	1574.17	ACPB
89.274	52023.1	1773.92	LDH	89.488	49524.9	443.738	GST	91.909	44986.5	428.767	RBOHF	89.491	42082.4	700.852	ACPB
89.274	53766.7	1577.81	LDH	89.488	71680	779.924	GST	92.215	44338	412.333	RBOHF	89.491	47289.2	1828.48	ACPB
89.282	49750.2	5760.81	LDH	89.498	50619.3	931.699	GST	92.522	44104.6	424.011	RBOHF	89.493	45413.3	455.296	ACPB
89.282	38906.3	2624.38	LDH	89.498	37973.6	519.937	GST	92.828	43635.1	449.201	RBOHF	89.493	38679.6	300.369	ACPB
89.577	49350.1	2928.92	LDH	89.795	27825.2	-136.519	GST	93.134	43094.8	464.119	RBOHF	89.798	34494.5	-31.034	ACPB
89.577	54644.7	3634.52	LDH	89.795	55090.7	649.659	GST	93.44	42830	450.39	RBOHF	89.798	43973.5	495.53	ACPB
89.577	50933.9	1528.25	LDH	89.795	40887	517.133	GST	93.747	42711.2	405.731	RBOHF	89.798	34402.6	283.727	ACPB
89.577	58325.6	1315.04	LDH	89.795	57235.8	805.698	GST	94.053	42756.2	343.881	RBOHF	89.798	48659.8	438.717	ACPB
89.577	59051.7	2420.86	LDH	89.795	44935.7	964.96	GST	94.359	42811.1	285.07	RBOHF	89.798	45453.1	322.272	ACPB
89.577	62765.3	1558.35	LDH	89.795	55749.7	825.421	GST	94.666	42686.1	244.233	RBOHF	89.798	45005.3	719.389	ACPB
89.577	43588.6	490.2	LDH	89.795	43322.2	936.983	GST	72	339616	6862.35	RBOHF	89.798	39364.3	497.085	ACPB
89.577	49366.3	1190.69	LDH	89.795	48486.9	828.27	GST	72.307	338982	6991.89	RBOHF	89.798	47455.4	2133.31	ACPB
89.577	67401.2	1779.86	LDH	89.795	45010.1	274.459	GST	72.613	336000	7159.25	RBOHF	89.798	45005.5	1831.51	ACPB
89.577	53894.1	1838.22	LDH	89.795	57021.1	553.286	GST	72.92	334320	7394.65	RBOHF	89.798	49820.3	1004.56	ACPB
89.577	44180	1097.17	LDH	89.795	49243.3	584.355	GST	73.226	332506	7742.73	RBOHF	89.798	39225.1	1676.17	ACPB
89.577	56470.4	1323.72	LDH	89.795	56405.9	596.156	GST	73.533	329720	8133.45	RBOHF	89.798	51130.8	1562.53	ACPB
89.577	52005.4	1294.2	LDH	89.795	46331.9	705.498	GST	73.84	326960	8526.31	RBOHF	89.798	38809.4	1436.06	ACPB
89.577	50223.9	757.776	LDH	89.795	58513.3	1080.39	GST	74.146	324267	8874.83	RBOHF	89.798	48819.7	1578.87	ACPB
89.577	51354.7	1007.99	LDH	89.795	47416.9	512.544	GST	74.453	320364	9141.89	RBOHF	89.798	43410.9	650.773	ACPB
89.577	54049.4	899.451	LDH	89.795	70455.6	753.513	GST	74.76	318327	9309.93	RBOHF	89.798	47390.1	1857.15	ACPB
89.585	49325.9	3209.17	LDH	89.805	50744.7	960.891	GST	75.066	314800	9384.05	RBOHF	89.8	45238	444.167	ACPB
89.585	39203.8	1548.61	LDH	89.805	39040.3	463.218	GST	75.373	311368	9387.62	RBOHF	89.8	38525.1	314.344	ACPB
89.88	48602.9	1675.43	LDH	90.102	26644.4	-139.662	GST	75.679	309486	9354.76	RBOHF	90.105	33085.3	-19.565	ACPB
89.88	54954.2	2042.77	LDH	90.102	53676	681.087	GST	75.986	305689	9320.12	RBOHF	90.105	42527	529.81	ACPB
89.88	50374.9	1008.34	LDH	90.102	40539.6	493.346	GST	76.293	302643	9309.44	RBOHF	90.105	34499.8	275.944	ACPB
89.88	57370.3	819.601	LDH	90.102	56787.8	748.433	GST	76.599	301036	9332.66	RBOHF	90.105	48591.5	435.147	ACPB
89.88	58700.3	1669.45	LDH	90.102	43731.5	941.334	GST	76.906	297650	9385.17	RBOHF	90.105	44609.4	326.969	ACPB
89.88	62185.7	1056.2	LDH	90.102	55208.2	870.07	GST	77.213	294907	9459.23	RBOHF	90.105	43866.5	695.414	ACPB
89.88	43128.8	204.708	LDH	90.102	42303.4	951.435	GST	77.519	290560	9560.73	RBOHF	90.105	38766.2	554.055	ACPB
89.88	49892.5	775.318	LDH	90.102	47922.8	826.233	GST	77.826	288490	9723.45	RBOHF	90.105	47134.5	2134.68	ACPB
89.88	66089.1	1397.19	LDH	90.102	44973.7	247.342	GST	78.132	285540	10017.4	RBOHF	90.105	45422.6	1808.53	ACPB
89.88	53372.5	1256.42	LDH	90.102	56562.9	575.139	GST	78.439	283096	10556.5	RBOHF	90.105	50474.2	1006.62	ACPB
89.88	44070	707.006	LDH	90.102	48440.5	596.453	GST	78.746	279327	11515.3	RBOHF	90.105	39658.8	1628.04	ACPB
89.88	56072.3	909.458	LDH	90.102	56844.8	509.907	GST	79.052	276522	13156.7	RBOHF	90.105	51674.2	1519.73	ACPB
89.88	52371.6	970.558	LDH	90.102	45655.1	792.002	GST	79.359	273137	15856.3	RBOHF	90.105	38938	1425.84	ACPB
89.88	50404.6	435.563	LDH	90.102	57515.8	1079.05	GST	79.666	269843	20091	RBOHF	90.105	49128.5	1583.47	ACPB
89.88	50558.4	645.099	LDH	90.102	48362.2	599.058	GST	79.972	265504	26356.4	RBOHF	90.105	42978.5	622.69	ACPB
89.88	54321.5	566.292	LDH	90.102	70329.7	722.231	GST	80.279	261315	34994	RBOHF	90.105	46825	1861.47	ACPB
89.888	48689	1831.71	LDH	90.112	50152.9	980.76	GST	80.585	255640	45953.5	RBOHF	90.107	44566.4	410.308	ACPB
89.888	37752.3	1026.52	LDH	90.112	37728.9	421.624	GST	80.892	247555	58572	RBOHF	90.107	38239.6	317.044	ACPB
90.183	48501.6	1069.55	LDH	90.409	25272.9	-142.289	GST	81.199	232340	71491.4	RBOHF	90.412	32959.3	10.563	ACPB
90.183	53239.7	1279.81	LDH	90.409	53398.3	707.449	GST	81.505	209673	82814.6	RBOHF	90.412	43091.3	547.352	ACPB
90.183	49004	798.806	LDH	90.409	40218.5	463.089	GST	81.812	176212	90515.5	RBOHF	90.412	34031.4	258.093	ACPB
90.183	57775.1	660.732	LDH	90.409	56655	643.637	GST	82.119	140355	92991.7	RBOHF	90.412	48259.1	415.588	ACPB
90.183	58039.8	1282.16	LDH	90.409	43598.3	896.829	GST	82.425	103917	89559.5	RBOHF	90.412	44694.4	345.542	ACPB
90.183	61941.8	856.46	LDH	90.409	55645.2	925.344	GST	82.732	75016.8	80685.9	RBOHF	90.412	44070.5	670.793	ACPB
90.183	42590.5	110.8	LDH	90.409	42701.2	949.126	GST	83.038	55349.6	67858.2	RBOHF	90.412	38027.1	586.843	ACPB
90.183	48635.1	644.007	LDH	90.409	47623.5	830.001	GST	83.345	45078.5	53142.9	RBOHF	90.412	47092.2	2117.82	ACPB
90.183	66455	1206.17	LDH	90.409	44083.3	279.09	GST	83.652	41105.6	38614.7	RBOHF	90.412	44703.1	1780.69	ACPB
90.183	52942.6	1013.48	LDH	90.409	55956.4	612.804	GST	83.958	39971.6	25872.5	RBOHF	90.412	49045.2	1006.97	ACPB
90.183	43803	550.38	LDH	90.409	47980.2	594.274	GST	84.265	39215.6	15792.6	RBOHF	90.412	39365.5	1579.59	ACPB
90.183	56716.1	722.668	LDH	90.409	55259.8	410.169	GST	84.572	38924	8544.17	RBOHF	90.412	51282.7	1489.25	ACPB
90.183	51865.4	811.611	LDH	90.409	45351.1	839.218	GST	84.878	38941.9	4599.37	RBOHF	90.412	39062.4	1427.07	ACPB
90.183	49839.9	355.868	LDH	90.409	56871.5	1055.98	GST	85.185	39232.7	2408.34	RBOHF	90.412	47496.4	1586.1	ACPB
90.183	51025	485.497	LDH	90.409	47452.8	679.162	GST	85.491	38589.9	1220.27	RBOHF	90.412	42350.5	626.595	ACPB
90.183	54069	418.187	LDH	90.409	70116	693.707	GST	85.798	37847.1	645.355	RBOHF	90.412	45668.4	1845.36	ACPB
90.191	48811.8	1139.62	LDH	90.419	50066.7	984.775	GST	86.105	38737.1	407.259	RBOHF	90.414	44651.5	361.357	ACPB
90.191	38031.4	773.536	LDH	90.419	37862.7	405.738	GST	86.411	37821	332.436	RBOHF	90.414	38087.4	301	ACPB
90.486	48505.5	797.077	LDH	90.715	26473.6	-161.585	GST	86.718	37591.4	321.706	RBOHF	90.719	32491.3	35.425	ACPB
90.486	54047.8	951.432	LDH	90.715	53807.4	720.43	GST	87.025	37267.2	322.992	RBOHF	90.719	42513.6	533.173	ACPB
90.486	49614.3	714.307	LDH	90.715	39315.3	423.088	GST	87.331	37262.7	313.587	RBOHF	90.719	34221.2	236.561	ACPB
90.486	56535.5	632.164	LDH	90.715	55523.7	513.249	GST	87.638	36341.4	290.859	RBOHF	90.719	48005.6	383.706	ACPB
90.486	58149.7	1061.17	LDH	90.715	44115.5	846.08	GST	87.944	36575.4	265.572	RBOHF	90.719	45061.4	372.926	ACPB
90.486	61583.2	803.964	LDH	90.715	54271.3	974.998	GST	88.251	36711.5	253.274	RBOHF	90.719	44236.8	668.039	ACPB
90.486	42677.2	99.195	LDH	90.715	41880.9	931.819	GST	88.558	36667.2	263.955	RBOHF	90.719	39040.7	588.71	ACPB
90.486	48594.7	639.129	LDH	90.715	47339.3	825.369	GST	88.864	36017.6	294.75	RBOHF	90.719	47379.2	2091.54	ACPB
90.486	65554.7	1105.37	LDH	90.715	43629.9	347.978	GST	89.171	35730.4	330.544	RBOHF	90.719	44593.3	1755.29	ACPB
90.486	53042.9	924.679	LDH	90.715	55529	652.693	GST	89.478	35376.5	352.791	RBOHF	90.719	48821.8	1004.99	ACPB
90.486	43477.6	493.363	LDH	90.715	48614.4	568.384	GST	89.784	34939.4	350.7	RBOHF	90.719	39268	1546.1	ACPB
90.486	55846.7	648.521	LDH	90.715	56868.5	328.588	GST	90.091	34579.5	326.947	RBOHF	90.719	51645.5	1477.97	ACPB
90.486	51060.6	714.387	LDH	90.715	45208.4	833.972	GST	90.397	35127.6	294.117	RBOHF	90.719	38497.1	1439.64	ACPB
90.486	49032	371.098	LDH	90.715	56826.8	1014.43	GST	90.704	34668.3	265.137	RBOHF	90.719	48570.4	1585.19	ACPB
90.486	50836.9	440.405	LDH	90.715	46211.8	724.854	GST	91.011	34471.7	245.562	RBOHF	90.719	42284.9	661.588	ACPB
90.486	52983.1	371.771	LDH	90.715	70405.7	679.504	GST	91.317	33734.9	233.268	RBOHF	90.719	46707.6	1823.21	ACPB
90.495	49044.9	808.315	LDH	90.726	49419.2	970.503	GST	91.624	33488.5	223.88	RBOHF	90.721	44805.2	307.318	ACPB
90.495	37421.3	637.528	LDH	90.726	38158.4	424.179	GST	91.931	33759.2	215.354	RBOHF	90.721	37364.6	259.129	ACPB
90.789	47717.7	676.767	LDH	91.022	25850.2	-191.874	GST	92.237	34300.4	207.26	RBOHF	91.026	32359.5	35.723	ACPB
90.789	53608.5	819.878	LDH	91.022	52105.5	718.354	GST	92.544	32893.1	197.456	RBOHF	91.026	42030.4	483.897	ACPB
90.789	49136.3	664.36	LDH	91.022	39881.7	378.564	GST	92.85	32740	182.181	RBOHF	91.026	33194.7	219.833	ACPB
90.789	56975.2	629.743	LDH	91.022	55820	391.42	GST	93.157	32328.8	160.969	RBOHF	91.026	48176.8	346.193	ACPB
90.789	57864.7	921.012	LDH	91.022	43638.1	807.675	GST	93.464	32923.3	140.656	RBOHF	91.026	44222.6	401.345	ACPB
90.789	61392.4	819.864	LDH	91.022	54480.1	1003.89	GST	93.77	32928.6	132.225	RBOHF	91.026	43751	694.464	ACPB
90.789	42204.5	108.122	LDH	91.022	41606.4	898.428	GST	94.077	32794.2	141.882	RBOHF	91.026	37897	561.621	ACPB
90.789	48343.4	680.038	LDH	91.022	46099.2	795.567	GST	94.384	31574.5	164.742	RBOHF	91.026	46704	2066.22	ACPB
90.789	65782.2	1053.82	LDH	91.022	43497.8	422.332	GST	94.69	31680.6	187.536	RBOHF	91.026	45058	1741.18	ACPB
90.789	52266.4	895.992	LDH	91.022	55545.2	685.124	GST	72	451132	9243.92	UDP-GT	91.026	49224.4	1001.72	ACPB
90.789	43073	468.593	LDH	91.022	47225.5	520.392	GST	72.307	449524	9444.53	UDP-GT	91.026	39183	1538.68	ACPB
90.789	55755.8	626.682	LDH	91.022	56427.4	287.991	GST	72.613	445777	9650	UDP-GT	91.026	50666.1	1485.67	ACPB
90.789	50882.9	635.838	LDH	91.022	44439.2	780.888	GST	72.92	443025	9869.4	UDP-GT	91.026	38570.8	1458.27	ACPB
90.789	48864.9	401.941	LDH	91.022	56242.3	960.136	GST	73.226	440049	10117.5	UDP-GT	91.026	47431.5	1579.88	ACPB
90.789	51066.4	473.377	LDH	91.022	46982.2	716.369	GST	73.533	436465	10405.4	UDP-GT	91.026	42170.2	718.219	ACPB
90.789	53195	378.551	LDH	91.022	70087.2	686.554	GST	73.839	433785	10827.6	UDP-GT	91.026	46757.7	1811.04	ACPB
90.798	48047.8	650.014	LDH	91.033	48478.7	941.716	GST	74.146	430450	11288.1	UDP-GT	91.028	43674.3	257.746	ACPB
90.798	37622.1	551.767	LDH	91.033	37971.1	479.611	GST	74.452	425705	11720.7	UDP-GT	91.028	37164.9	193.49	ACPB
91.092	47607.7	618.593	LDH	91.329	25882.1	-207.473	GST	74.759	421502	12079.7	UDP-GT	91.333	32325.9	5.514	ACPB
91.092	52639.7	760.311	LDH	91.329	53277.6	705.884	GST	75.066	418673	12336.3	UDP-GT	91.333	41298.8	409.353	ACPB
91.092	48857.1	615.223	LDH	91.329	39544.4	341.307	GST	75.372	413309	12484.5	UDP-GT	91.333	34368.9	215.019	ACPB
91.092	56507.5	609.278	LDH	91.329	56651.4	312.73	GST	75.679	409942	12539.7	UDP-GT	91.333	47659.3	308.092	ACPB
91.092	57685.3	831.379	LDH	91.329	43723.6	791.633	GST	75.985	405109	12529.6	UDP-GT	91.333	43657.4	422.939	ACPB
91.092	61006	861.062	LDH	91.329	53456.5	1002.47	GST	76.292	402285	12485.1	UDP-GT	91.333	43696	735.706	ACPB
91.092	41244.1	111.223	LDH	91.329	41276.4	846.292	GST	76.598	397931	12433.7	UDP-GT	91.333	37792.6	512.947	ACPB
91.092	48468.8	730.885	LDH	91.329	46826.6	733.353	GST	76.905	393670	12396	UDP-GT	91.333	46332.1	2048.59	ACPB
91.092	65194.2	1035.87	LDH	91.329	43061.9	477.243	GST	77.211	389926	12386.2	UDP-GT	91.333	44778.9	1744.9	ACPB
91.092	52106	883.711	LDH	91.329	54970.7	709.036	GST	77.518	386502	12411.8	UDP-GT	91.333	49150.1	998.7	ACPB
91.092	42739.4	446.287	LDH	91.329	47504.7	463.586	GST	77.825	381922	12473.7	UDP-GT	91.333	39303.3	1559.5	ACPB
91.092	54516.1	622.165	LDH	91.329	55261.8	291.05	GST	78.131	378193	12567.3	UDP-GT	91.333	51179.4	1505.4	ACPB
91.092	50656.8	563.443	LDH	91.329	44398.3	700.791	GST	78.438	374943	12690.1	UDP-GT	91.333	38324.4	1474.43	ACPB
91.092	48570.7	412.014	LDH	91.329	55990.3	903.994	GST	78.744	369930	12858.8	UDP-GT	91.333	47704.3	1569.71	ACPB
91.092	50930.1	556.992	LDH	91.329	45992.5	650.722	GST	79.051	365654	13139	UDP-GT	91.333	42129.4	783.921	ACPB
91.092	52892.1	404.744	LDH	91.329	68487.9	712.378	GST	79.357	361936	13688.1	UDP-GT	91.333	46220.2	1816.64	ACPB
91.101	47839.3	567.569	LDH	91.34	49563.2	908.076	GST	79.664	358214	14807.6	UDP-GT	91.335	44306	220.408	ACPB
91.101	37916.8	493.006	LDH	91.34	37474	564.365	GST	79.97	353963	16993.1	UDP-GT	91.335	37178.8	119.314	ACPB
91.395	47315.4	587.448	LDH	91.636	26631	-182.3	GST	80.277	349013	20946.5	UDP-GT	91.639	32084.2	-46.411	ACPB
91.395	52113.5	718.302	LDH	91.636	52374.2	691.272	GST	80.583	345865	27502.7	UDP-GT	91.639	42216.2	328.157	ACPB
91.395	48991.6	561.183	LDH	91.636	40257.3	322.496	GST	80.89	342250	37423.7	UDP-GT	91.639	33459.9	223.644	ACPB
91.395	55328.4	558.344	LDH	91.636	56981.1	297.563	GST	81.197	337223	51058.7	UDP-GT	91.639	47159.9	271.557	ACPB
91.395	57261.8	780.558	LDH	91.636	43241	792.114	GST	81.503	328440	67952.5	UDP-GT	91.639	43826.9	433.131	ACPB
91.395	60482.7	901.203	LDH	91.636	53477.1	970.985	GST	81.81	315374	86571.4	UDP-GT	91.639	42967.2	761.471	ACPB
91.395	42335.1	107.836	LDH	91.636	41173.9	774.691	GST	82.116	293008	104348	UDP-GT	91.639	37454.9	452.625	ACPB
91.395	47769.1	776.645	LDH	91.636	46065.7	647.189	GST	82.423	250753	118154	UDP-GT	91.639	46541.6	2039.38	ACPB
91.395	64820.5	1041.45	LDH	91.636	43184	503.707	GST	82.729	198188	125132	UDP-GT	91.639	43928.1	1767.35	ACPB
91.395	52101.7	869.362	LDH	91.636	55163.5	730.275	GST	83.036	146088	123586	UDP-GT	91.639	48529.5	996.804	ACPB
91.395	43087.2	417.202	LDH	91.636	47753.7	418.019	GST	83.342	103923	113563	UDP-GT	91.639	39426.2	1601.14	ACPB
91.395	55258.5	615.008	LDH	91.636	55927.9	320.123	GST	83.649	72135.7	96865.8	UDP-GT	91.639	50316.3	1526.47	ACPB
91.395	50559.9	500.48	LDH	91.636	44648.3	621.515	GST	83.956	56846.2	76477.3	UDP-GT	91.639	36973.4	1480.44	ACPB
91.395	48482.1	390.575	LDH	91.636	55804	860.711	GST	84.262	53308.5	55656.6	UDP-GT	91.639	47248.2	1554.65	ACPB
91.395	49515.6	653.964	LDH	91.636	44560.4	544.054	GST	84.569	52857.1	37073.3	UDP-GT	91.639	40989.5	848.222	ACPB
91.395	53210.1	425.562	LDH	91.636	68541.4	747.195	GST	84.875	52628.5	22290.3	UDP-GT	91.639	45657.8	1834.95	ACPB
91.404	47665	516.504	LDH	91.647	48568.9	881.946	GST	85.182	52131.2	11703.2	UDP-GT	91.642	43659.9	200.702	ACPB
91.404	36797	452.63	LDH	91.647	37202.8	659.32	GST	85.488	51668.8	6342.73	UDP-GT	91.642	37124	60.304	ACPB
91.698	47553.3	575.577	LDH	91.943	26048.9	-110.784	GST	85.795	51739	3378.29	UDP-GT	91.946	31433	-100.451	ACPB
91.698	52730.7	678.675	LDH	91.943	51622.5	683.394	GST	86.101	50987.5	1783.18	UDP-GT	91.946	42112.1	260.173	ACPB
91.698	48003.8	507.196	LDH	91.943	38533.1	325.819	GST	86.408	51242.4	997.974	UDP-GT	91.946	33077.6	239.566	ACPB
91.698	55609.2	481.715	LDH	91.943	55417.5	342.351	GST	86.714	51121.4	646.24	UDP-GT	91.946	47663.5	238.679	ACPB
91.698	57150.6	759.029	LDH	91.943	42254.1	791.838	GST	87.021	50741.3	509.966	UDP-GT	91.946	43684.4	433.163	ACPB
91.698	59839.7	924.773	LDH	91.943	52912.1	920.068	GST	87.328	50489.5	478.551	UDP-GT	91.946	42686.3	742.294	ACPB
91.698	41784.1	109.518	LDH	91.943	40797.8	687.941	GST	87.634	50448.1	501.778	UDP-GT	91.946	37446.7	391.965	ACPB
91.698	47402.1	807.97	LDH	91.943	46414.9	558.084	GST	87.941	50352.9	557.339	UDP-GT	91.946	46210.8	2034.49	ACPB
91.698	64341.5	1059.23	LDH	91.943	42596.9	507.433	GST	88.247	50077.3	632.342	UDP-GT	91.946	44900.9	1802.75	ACPB
91.698	51279	846.915	LDH	91.943	54507	755.317	GST	88.554	49304.1	714.985	UDP-GT	91.946	48067.4	995.974	ACPB
91.698	42135.3	383.481	LDH	91.943	46941.7	402.944	GST	88.86	49484	792.718	UDP-GT	91.946	38265.9	1650.2	ACPB
91.698	54714	598.405	LDH	91.943	54356.6	348.8	GST	89.167	48640.4	853.9	UDP-GT	91.946	49649.7	1538.7	ACPB
91.698	50716.3	457.106	LDH	91.943	44149.8	565.825	GST	89.473	48687.6	890.436	UDP-GT	91.946	37735.5	1473.39	ACPB
91.698	47918.9	340.443	LDH	91.943	55940.4	842.103	GST	89.78	47717	899.69	UDP-GT	91.946	46398.6	1535.72	ACPB
91.698	48713.8	722.374	LDH	91.943	46287.8	427.053	GST	90.086	47879.6	884.728	UDP-GT	91.946	40756.5	904.873	ACPB
91.698	51556.9	426.02	LDH	91.943	68912.3	780.146	GST	90.393	47137.8	852.602	UDP-GT	91.946	45242.8	1851.77	ACPB
91.707	47752.2	480.823	LDH	91.954	48108.4	873.141	GST	90.7	47379.7	811.375	UDP-GT	91.948	43879	200.654	ACPB
91.707	36977.2	422.78	LDH	91.954	36631.5	738.894	GST	91.006	46644	767.101	UDP-GT	91.948	37675.8	36.823	ACPB
92.001	46994.3	582.747	LDH	92.25	24219.2	-14.723	GST	91.313	46560.4	722.455	UDP-GT	92.253	31555.9	-132.802	ACPB
92.001	51850.8	644.683	LDH	92.25	51523.7	689.738	GST	91.619	46071.3	677.669	UDP-GT	92.253	41325.2	220.129	ACPB
92.001	47932.9	461.31	LDH	92.25	39285.4	346.646	GST	91.926	45865.4	632.775	UDP-GT	92.253	33345.8	251.224	ACPB
92.001	55700.5	394.909	LDH	92.25	55003.5	422.214	GST	92.232	46005.2	589.654	UDP-GT	92.253	46650.4	215.607	ACPB
92.001	56402.6	756.304	LDH	92.25	41727.9	774.958	GST	92.539	45559.9	552.91	UDP-GT	92.253	42957.7	430.043	ACPB
92.001	59636.2	926.009	LDH	92.25	53332.2	865.327	GST	92.845	44646.8	529.223	UDP-GT	92.253	42323.5	667.46	ACPB
92.001	41507.7	125.538	LDH	92.25	40674.8	596.157	GST	93.152	45804.7	525.035	UDP-GT	92.253	37408.3	342.607	ACPB
92.001	46603.7	815.962	LDH	92.25	45986.2	490.346	GST	93.459	44864.5	542.59	UDP-GT	92.253	45762.5	2028.58	ACPB
92.001	63358	1077.97	LDH	92.25	42448.5	501.864	GST	93.765	44742.7	576.292	UDP-GT	92.253	43431.2	1840.48	ACPB
92.001	51196.4	817.092	LDH	92.25	54056.1	785.714	GST	94.072	44609.3	612.414	UDP-GT	92.253	47611.4	996.073	ACPB
92.001	42274.7	353.175	LDH	92.25	46660.2	428.6	GST	94.378	43715.1	634.228	UDP-GT	92.253	38138.9	1693.62	ACPB
92.001	54133.3	576.61	LDH	92.25	54381.5	357.568	GST	94.685	43280.5	630.129	UDP-GT	92.253	50239.1	1536.22	ACPB
92.001	49500.1	441.793	LDH	92.25	44581	542.593	GST	72	413164	8966.28	UDP-GT	92.253	37297	1456.64	ACPB
92.001	47673.4	270.561	LDH	92.25	55506.5	848.359	GST	72.307	411564	9121.06	UDP-GT	92.253	46821.1	1515.74	ACPB
92.001	48533.7	733.469	LDH	92.25	45648.8	334.406	GST	72.613	409291	9313.02	UDP-GT	92.253	41148.3	950.022	ACPB
92.001	51638.5	403.099	LDH	92.25	68062.5	804.09	GST	72.92	405727	9539.32	UDP-GT	92.253	45517.5	1853.3	ACPB
92.01	47481.2	458.327	LDH	92.261	48195.5	883.873	GST	73.226	403213	9788.16	UDP-GT	92.255	43420.7	217.626	ACPB
92.01	36716.7	394.706	LDH	92.261	36306.1	780.958	GST	73.533	400216	10043.3	UDP-GT	92.255	36893.2	54.094	ACPB
92.304	46946.3	604.529	LDH	92.556	25318.5	67.521	GST	73.839	396335	10360.6	UDP-GT	92.56	31562.4	-124.292	ACPB
92.304	51709.9	624.112	LDH	92.556	51853.5	714.403	GST	74.146	392332	10626.9	UDP-GT	92.56	41030.5	215.079	ACPB
92.304	48086.1	431.967	LDH	92.556	38500.9	377.756	GST	74.452	389466	10830.6	UDP-GT	92.56	32375.5	247.351	ACPB
92.304	54873.6	319.28	LDH	92.556	55420	505.869	GST	74.759	385207	10974.3	UDP-GT	92.56	46803.5	213.461	ACPB
92.304	56367.1	762.951	LDH	92.556	42720.4	737.999	GST	75.066	381936	11069.6	UDP-GT	92.56	42788.7	433.152	ACPB
92.304	59413.9	907.421	LDH	92.556	53048.4	819.061	GST	75.372	378936	11130.8	UDP-GT	92.56	42448.8	552.016	ACPB
92.304	40913.2	154.187	LDH	92.556	40688	513.32	GST	75.679	374097	11170.2	UDP-GT	92.56	37543.7	313.968	ACPB
92.304	46385.7	794.524	LDH	92.556	46145.3	461.928	GST	75.985	371262	11198.4	UDP-GT	92.56	45099.7	2018.55	ACPB
92.304	63483.6	1089.79	LDH	92.556	42054.4	501.577	GST	76.292	367768	11224.6	UDP-GT	92.56	43566	1869.28	ACPB
92.304	51141.6	784.877	LDH	92.556	54139.1	817.109	GST	76.598	363653	11256.8	UDP-GT	92.56	47915.9	997.709	ACPB
92.304	41958.8	335.479	LDH	92.556	47448	489.666	GST	76.905	360690	11301.3	UDP-GT	92.56	38226.6	1724.39	ACPB
92.304	54185.8	559.875	LDH	92.556	54477.8	343.613	GST	77.211	356545	11361.9	UDP-GT	92.56	48857.1	1519.37	ACPB
92.304	50488.8	453.733	LDH	92.556	43488	545.839	GST	77.518	352922	11438.6	UDP-GT	92.56	37419.7	1437.89	ACPB
92.304	47495.3	193.275	LDH	92.556	55028	864.218	GST	77.825	350042	11529.4	UDP-GT	92.56	46214.7	1498.81	ACPB
92.304	48534.7	684.494	LDH	92.556	45589.6	292.06	GST	78.131	345464	11633.1	UDP-GT	92.56	41016.3	978.557	ACPB
92.304	51931.2	366.006	LDH	92.556	67294.9	816.818	GST	78.438	341623	11756.6	UDP-GT	92.56	44008.2	1834.75	ACPB
92.314	47320.3	451.527	LDH	92.568	47876.9	906.494	GST	78.744	338683	11929.4	UDP-GT	92.562	43336.5	244.042	ACPB
92.314	35848.1	363.353	LDH	92.568	35716.9	776.867	GST	79.051	334494	12230.6	UDP-GT	92.562	36960.3	98.447	ACPB
92.607	45932.8	629.645	LDH	92.863	24390	100.963	GST	79.357	330518	12829.9	UDP-GT	92.867	32302.7	-70.043	ACPB
92.607	51429.3	620.566	LDH	92.863	51150.4	755.702	GST	79.664	326316	14038	UDP-GT	92.867	41444.8	244.784	ACPB
92.607	48342.7	424.987	LDH	92.863	38238.1	416.115	GST	79.97	323112	16349.4	UDP-GT	92.867	32409.7	222.821	ACPB
92.607	55088.3	274.963	LDH	92.863	54117.1	573.133	GST	80.277	319712	20444.1	UDP-GT	92.867	47395.7	243.714	ACPB
92.607	56415.3	771.743	LDH	92.863	42031.7	690.666	GST	80.583	315919	27105.3	UDP-GT	92.867	43473.5	448.863	ACPB
92.607	58918.9	876.033	LDH	92.863	52139.9	784.807	GST	80.89	311158	37012.6	UDP-GT	92.867	42290.6	428.163	ACPB
92.607	40663.9	183.693	LDH	92.863	40186.6	452.896	GST	81.197	306693	50414.8	UDP-GT	92.867	36649.3	309.63	ACPB
92.607	46414.1	744.429	LDH	92.863	45572.2	478.516	GST	81.503	299120	66761.4	UDP-GT	92.867	45705.3	2004.98	ACPB
92.607	63342.4	1090.89	LDH	92.863	41874.8	518.474	GST	81.81	285607	84463.6	UDP-GT	92.867	43074.3	1881.9	ACPB
92.607	50571.1	757.688	LDH	92.863	53134.8	842.639	GST	82.116	263848	100977	UDP-GT	92.867	48122.9	1001.93	ACPB
92.607	42194.3	335.743	LDH	92.863	46808.7	563.984	GST	82.423	223399	113305	UDP-GT	92.867	37910.8	1743.54	ACPB
92.607	53846.5	558.388	LDH	92.863	54474.1	318.93	GST	82.729	175528	118822	UDP-GT	92.867	49608.4	1494.27	ACPB
92.607	49656.4	479.952	LDH	92.863	43145.2	561.304	GST	83.036	128990	116113	UDP-GT	92.867	36681.3	1425.38	ACPB
92.607	46838.7	124.313	LDH	92.863	54389.2	864.298	GST	83.342	91593	105476	UDP-GT	92.867	47328	1488.16	ACPB
92.607	48760.1	595.991	LDH	92.863	44435.9	307.955	GST	83.649	64814.3	88842.2	UDP-GT	92.867	39372.9	982.974	ACPB
92.607	51710.6	331.958	LDH	92.863	67291.4	820.361	GST	83.956	53945.7	69162	UDP-GT	92.867	45078	1802.76	ACPB
92.617	46428.8	463.066	LDH	92.875	47366.6	925.625	GST	84.262	51464.5	49513.2	UDP-GT	92.869	42731.9	269.175	ACPB
92.617	36975.9	330.715	LDH	92.875	35557.7	736.007	GST	84.569	50078.2	32306.9	UDP-GT	92.869	36424.4	144.547	ACPB
92.91	46169	645.153	LDH	93.17	23655.2	70.671	GST	84.875	50339.7	18857	UDP-GT	93.174	31105.8	15.341	ACPB
92.91	50943	629.834	LDH	93.17	50624.3	804.903	GST	85.182	50284.4	9557.56	UDP-GT	93.174	41299.9	301.881	ACPB
92.91	47167	439.25	LDH	93.17	38651.1	464.173	GST	85.488	49501.4	5123.63	UDP-GT	93.174	33019.2	181.035	ACPB
92.91	55361.9	272.244	LDH	93.17	54394.9	622.893	GST	85.795	49351.8	2541.84	UDP-GT	93.174	46642.5	310.084	ACPB
92.91	55611.1	776.329	LDH	93.17	41841	647.122	GST	86.101	48491.9	1154.84	UDP-GT	93.174	42668.4	476.549	ACPB
92.91	58742.8	838.985	LDH	93.17	51902.2	758.528	GST	86.408	48719.1	453.241	UDP-GT	93.174	42286.3	327.339	ACPB
92.91	40583.1	200.185	LDH	93.17	40748.9	421.933	GST	86.714	48627.6	111.24	UDP-GT	93.174	37293.8	325.004	ACPB
92.91	46076.2	673.942	LDH	93.17	45773.6	532.014	GST	87.021	48371.4	-45.837	UDP-GT	93.174	45208	1990.82	ACPB
92.91	62426.3	1079.46	LDH	93.17	42230.1	560.033	GST	87.328	48284.7	-97.411	UDP-GT	93.174	42776.3	1878.12	ACPB
92.91	50471.8	742.947	LDH	93.17	52997.5	857.819	GST	87.634	48589.8	-77.399	UDP-GT	93.174	47006.9	1008.97	ACPB
92.91	41818.6	351.375	LDH	93.17	44996.3	619.618	GST	87.941	47707.3	-6.544	UDP-GT	93.174	37390.5	1757.44	ACPB
92.91	54012.9	577.725	LDH	93.17	53838.3	299.853	GST	88.247	47626.5	92.111	UDP-GT	93.174	49056.7	1470.37	ACPB
92.91	49126	499.446	LDH	93.17	43158.1	575.908	GST	88.554	47715.5	189.524	UDP-GT	93.174	37122.9	1424.5	ACPB
92.91	47602.9	80.923	LDH	93.17	53651.4	826.149	GST	88.86	47115.1	254.8	UDP-GT	93.174	45922.6	1483.86	ACPB
92.91	47684.4	496.515	LDH	93.17	45293.7	370.285	GST	89.167	45609.8	264.332	UDP-GT	93.174	39094.6	957.426	ACPB
92.91	51153.5	317.654	LDH	93.17	66268.1	820.373	GST	89.473	46468.6	211.937	UDP-GT	93.174	44680.6	1770.5	ACPB
92.92	46699.7	494.939	LDH	93.182	46910	924.561	GST	89.78	45301.7	113.86	UDP-GT	93.176	42470.3	282.765	ACPB
92.92	36065.6	303.864	LDH	93.182	35469.1	681.798	GST	90.086	45673	3.407	UDP-GT	93.176	35669.7	169.252	ACPB
93.213	45493.6	644.136	LDH	93.477	23468.7	-12.884	GST	90.393	46277.4	-83.993	UDP-GT	93.481	30228.9	103.039	ACPB
93.213	50902.5	641.267	LDH	93.477	49973.3	848.689	GST	90.7	45826.4	-127.173	UDP-GT	93.481	41276.6	371.456	ACPB
93.213	47406.8	464.8	LDH	93.477	38200	524.683	GST	91.006	45413.3	-126.757	UDP-GT	93.481	31610.6	131.973	ACPB
93.213	54697.1	305.553	LDH	93.477	54602.8	666.994	GST	91.313	44813.1	-99.722	UDP-GT	93.481	46446	402.48	ACPB
93.213	55414.9	769.377	LDH	93.477	41483.3	615.732	GST	91.619	44467.3	-66.479	UDP-GT	93.481	41629.3	508.997	ACPB
93.213	58326.2	801.291	LDH	93.477	51810.7	734.605	GST	91.926	45208.3	-40.513	UDP-GT	93.481	41758.5	265.066	ACPB
93.213	40139.9	196.051	LDH	93.477	40600.5	416.239	GST	92.232	44875.9	-25.943	UDP-GT	93.481	36809.8	348.06	ACPB
93.213	45482.6	595.553	LDH	93.477	45535.3	603.087	GST	92.539	43688.7	-20.416	UDP-GT	93.481	45134	1978.57	ACPB
93.213	61729.5	1054.03	LDH	93.477	40976.6	628.08	GST	92.845	43477.2	-17.958	UDP-GT	93.481	42209.8	1864.45	ACPB
93.213	50468.1	745.197	LDH	93.477	52652.9	863.455	GST	93.152	44271	-10.227	UDP-GT	93.481	46816.2	1017.36	ACPB
93.213	40866.3	371.269	LDH	93.477	45192.5	629.163	GST	93.459	43853.4	11.065	UDP-GT	93.481	37792.1	1772.55	ACPB
93.213	52809.2	617.03	LDH	93.477	53709	296.073	GST	93.765	43329	49.555	UDP-GT	93.481	48917.7	1456.75	ACPB
93.213	48014.1	493.393	LDH	93.477	42963.2	583.411	GST	94.072	43025.7	100.691	UDP-GT	93.481	36678.9	1436.14	ACPB
93.213	47426.4	75.789	LDH	93.477	53777.2	743.326	GST	94.378	42876.2	153.53	UDP-GT	93.481	45638.1	1482.36	ACPB
93.213	47972.7	407.405	LDH	93.477	44781	453.474	GST	94.685	42185.1	197.149	UDP-GT	93.481	39556.6	904.543	ACPB
93.213	51138.8	330.54	LDH	93.477	66777.2	825.01	GST	72.001	425369	9366.6	UDP-GT	93.481	44332.6	1749.44	ACPB
93.223	47024.9	548.176	LDH	93.489	45813.5	893.393	GST	72.307	424449	9549.76	UDP-GT	93.483	42922.2	278.805	ACPB
93.223	36111.1	289.24	LDH	93.489	35863.3	640.973	GST	72.614	421623	9754.16	UDP-GT	93.483	35699.2	162.975	ACPB
93.516	45571.8	629.646	LDH	93.784	24280.8	-120.347	GST	72.921	417878	9971.03	UDP-GT	93.788	29790.7	164.951	ACPB
93.516	50246.2	642.472	LDH	93.784	49452.1	875.244	GST	73.228	415138	10194.5	UDP-GT	93.788	39887.9	432.927	ACPB
93.516	46464.1	486.576	LDH	93.784	37291.1	594.093	GST	73.535	411750	10429.2	UDP-GT	93.788	32308.5	87.556	ACPB
93.516	53908.2	354.27	LDH	93.784	53703.1	716.395	GST	73.841	408339	10710.8	UDP-GT	93.788	46086.2	498.271	ACPB
93.516	55173.6	743.36	LDH	93.784	41631.6	594.948	GST	74.148	405558	10977.8	UDP-GT	93.788	41905.9	537.154	ACPB
93.516	57484.7	766.54	LDH	93.784	51756.3	710.681	GST	74.455	401244	11212.7	UDP-GT	93.788	41814.7	237.154	ACPB
93.516	40005.9	173.63	LDH	93.784	39822.9	420.367	GST	74.762	397740	11398.4	UDP-GT	93.788	36269.2	363.534	ACPB
93.516	45588.2	521.673	LDH	93.784	44632	667.405	GST	75.069	394025	11525.3	UDP-GT	93.788	44705.8	1968.25	ACPB
93.516	61752	1014.99	LDH	93.784	40960.5	718.272	GST	75.376	390357	11595.1	UDP-GT	93.788	43335.3	1850.58	ACPB
93.516	50006.9	763.715	LDH	93.784	52429	864.983	GST	75.682	387113	11621.4	UDP-GT	93.788	46853.6	1024.45	ACPB
93.516	41396.2	380.703	LDH	93.784	45621.9	583.832	GST	75.989	382982	11626.9	UDP-GT	93.788	37177.5	1791.38	ACPB
93.516	53329.5	669.654	LDH	93.784	53524.7	306.365	GST	76.296	379126	11638.3	UDP-GT	93.788	48989	1458.65	ACPB
93.516	48666.2	455.411	LDH	93.784	42704.8	583.467	GST	76.603	375902	11677.3	UDP-GT	93.788	36497.9	1456.98	ACPB
93.516	46747.5	109.229	LDH	93.784	53120.3	629.936	GST	76.91	373230	11751.3	UDP-GT	93.788	45870.7	1478.5	ACPB
93.516	47233.7	337.253	LDH	93.784	42934.5	528.456	GST	77.216	368404	11849.6	UDP-GT	93.788	39054.1	838.728	ACPB
93.516	50948.7	365.352	LDH	93.784	65977.3	841.588	GST	77.523	365807	11949	UDP-GT	93.788	44413.5	1743.05	ACPB
93.526	45955.9	620.541	LDH	93.796	46702.2	834.561	GST	77.83	361080	12027.7	UDP-GT	93.79	41388.2	257.607	ACPB
93.526	35791.6	287.923	LDH	93.796	34683.8	631.695	GST	78.137	357069	12080	UDP-GT	93.79	36502.6	131.737	ACPB
93.819	45361.8	611.863	LDH	94.09	23197.6	-217.346	GST	78.444	353604	12128.1	UDP-GT	94.094	30572.5	188.605	ACPB
93.819	49659.9	625.25	LDH	94.09	49169.8	880.214	GST	78.751	350374	12232.8	UDP-GT	94.094	39768.3	466.8	ACPB
93.819	46800.5	492.079	LDH	94.09	37513.2	661.015	GST	79.057	346456	12514.6	UDP-GT	94.094	32248	56.635	ACPB
93.819	53969	391.146	LDH	94.09	53545.5	771.154	GST	79.364	341963	13191.6	UDP-GT	94.094	44978.4	571.494	ACPB
93.819	54641.2	694.279	LDH	94.09	40755.6	576.647	GST	79.671	338893	14630.6	UDP-GT	94.094	41756.6	555.854	ACPB
93.819	58313.9	738.621	LDH	94.09	51259.3	687.802	GST	79.978	335248	17385.5	UDP-GT	94.094	41632.6	226.773	ACPB
93.819	39477.8	143.203	LDH	94.09	39252.6	414.159	GST	80.285	331581	22183.7	UDP-GT	94.094	36027.2	358.961	ACPB
93.819	45327.8	461.93	LDH	94.09	43956.6	704.546	GST	80.591	328079	29808.4	UDP-GT	94.094	44219.4	1957.69	ACPB
93.819	61142.8	967.395	LDH	94.09	40846.6	821.156	GST	80.898	323500	40846.8	UDP-GT	94.094	41735.8	1844.31	ACPB
93.819	49652.2	791.927	LDH	94.09	51770	869.227	GST	81.205	317961	55330.7	UDP-GT	94.094	46087.3	1027.9	ACPB
93.819	40081.3	369.489	LDH	94.09	43794.8	498.18	GST	81.512	308455	72383.6	UDP-GT	94.094	36559.4	1812.12	ACPB
93.819	52415.6	725.565	LDH	94.09	52801.1	321.802	GST	81.819	292060	90068	UDP-GT	94.094	49169.1	1475.33	ACPB
93.819	48869.4	395.026	LDH	94.09	42403.5	576.78	GST	82.125	262661	105608	UDP-GT	94.094	36119.8	1480.94	ACPB
93.819	46591.1	165.963	LDH	94.09	54319.3	513.485	GST	82.432	213402	116027	UDP-GT	94.094	45393.8	1468.7	ACPB
93.819	47562.6	285.947	LDH	94.09	43764.2	572.897	GST	82.739	163078	119018	UDP-GT	94.094	38598.1	781.789	ACPB
93.819	50159.4	408.008	LDH	94.09	65312.8	872.436	GST	83.046	117140	113712	UDP-GT	94.094	43791.9	1746.22	ACPB
93.829	46149	703.321	LDH	94.103	45866.9	761.985	GST	83.353	81628.3	100985	UDP-GT	94.097	41985	225.408	ACPB
93.829	35457.6	295.214	LDH	94.103	35267.8	656.867	GST	83.66	59320.5	83185	UDP-GT	94.097	35451.7	90.15	ACPB
94.122	45210.5	600.879	LDH	94.397	23873.4	-278.671	GST	83.966	52272.4	63377.5	UDP-GT	94.401	29685.2	181.485	ACPB
94.122	49454.8	589.83	LDH	94.397	49332.4	868.354	GST	84.273	50857.9	44460	UDP-GT	94.401	39828.6	463.659	ACPB
94.122	46472.6	477.383	LDH	94.397	36538.8	711.556	GST	84.58	50156.6	28481.4	UDP-GT	94.401	32204.9	41.88	ACPB
94.122	52965.9	394.794	LDH	94.397	51918.8	821.178	GST	84.887	49582.5	16374.2	UDP-GT	94.401	45346.2	604.931	ACPB
94.122	54480.7	625.73	LDH	94.397	41138.4	552.734	GST	85.194	49306.4	8553.55	UDP-GT	94.401	41162.3	566.279	ACPB
94.122	57352.1	721.755	LDH	94.397	51313.3	667.154	GST	85.5	49483.5	4460.31	UDP-GT	94.401	41247.7	215.603	ACPB
94.122	39952.5	117.568	LDH	94.397	39521.7	382.932	GST	85.807	49618	2173.93	UDP-GT	94.401	35890.8	329.867	ACPB
94.122	45157.6	421.938	LDH	94.397	43948.4	706.181	GST	86.114	49231.8	1032.77	UDP-GT	94.401	44989.4	1944.6	ACPB
94.122	61277.5	921.287	LDH	94.397	40126.7	924.965	GST	86.421	49092.5	530.818	UDP-GT	94.401	42712.1	1848.12	ACPB
94.122	49298.3	819.611	LDH	94.397	51564	881.037	GST	86.728	48038.9	336.544	UDP-GT	94.401	45881.6	1027.07	ACPB
94.122	40765.7	338.082	LDH	94.397	45892.5	401.96	GST	87.035	47834.1	265.288	UDP-GT	94.401	36320.5	1831.47	ACPB
94.122	52462.2	774.744	LDH	94.397	52671.8	332.772	GST	87.341	48486.6	235.937	UDP-GT	94.401	48007.3	1500.63	ACPB
94.122	48319.7	331.269	LDH	94.397	41996.1	561.803	GST	87.648	47833	227.029	UDP-GT	94.401	36279.1	1501.45	ACPB
94.122	45653.5	220.728	LDH	94.397	53044.4	420.301	GST	87.955	47825.5	240.283	UDP-GT	94.401	45051.6	1452.79	ACPB
94.122	47317.7	251.062	LDH	94.397	43470.8	577.776	GST	88.262	47533.7	276.916	UDP-GT	94.401	39046.7	752.973	ACPB
94.122	49992.2	443.933	LDH	94.397	65641.1	912.972	GST	88.569	47121.2	328.709	UDP-GT	94.401	43756.1	1749.64	ACPB
94.133	44921.1	781.502	LDH	94.41	45857.4	693.736	GST	88.875	46807.5	380.543	UDP-GT	94.404	42337.9	191.491	ACPB
94.133	35991.7	303.794	LDH	94.41	34267.8	705.712	GST	89.182	46645.4	417.708	UDP-GT	94.404	35181.4	51.764	ACPB
94.425	44976.6	600.569	LDH	94.704	23780.5	-296.596	GST	89.489	45723.1	431.741	UDP-GT	94.708	29766.7	162.742	ACPB
94.425	50054.1	544.923	LDH	94.704	48490.4	849.867	GST	89.796	46262.3	422.027	UDP-GT	94.708	39557.8	428.815	ACPB
94.425	45970.2	447.449	LDH	94.704	36230.3	737.384	GST	90.103	45574.3	393.893	UDP-GT	94.708	31554.5	39.486	ACPB
94.425	53655.2	358.922	LDH	94.704	52682.8	855.305	GST	90.409	45128.3	355.371	UDP-GT	94.708	44316.7	597.705	ACPB
94.425	54141	549.153	LDH	94.704	40743.5	519.791	GST	90.716	45286.6	314.399	UDP-GT	94.708	41291.5	573.784	ACPB
94.425	57248.1	718.266	LDH	94.704	50670.3	647.549	GST	91.023	44789.9	277.108	UDP-GT	94.708	41279.7	192.107	ACPB
94.425	39720.9	106.272	LDH	94.704	39741.7	324.655	GST	91.33	44771.9	246.839	UDP-GT	94.708	36006.7	281.184	ACPB
94.425	45571.4	402.467	LDH	94.704	44528.5	678.783	GST	91.637	44478.7	224.164	UDP-GT	94.708	43921	1928.33	ACPB
94.425	61473.6	887.377	LDH	94.704	39374.6	1019.44	GST	91.944	44122.8	208.165	UDP-GT	94.708	41275.2	1859.2	ACPB
94.425	49080.1	837.133	LDH	94.704	51663.9	901.557	GST	92.25	44097.5	198.539	UDP-GT	94.708	46018	1023.16	ACPB
94.425	41105.2	297.077	LDH	94.704	44857.8	324.323	GST	92.557	43528.2	197.039	UDP-GT	94.708	36604.4	1847.8	ACPB
94.425	51386.9	810.381	LDH	94.704	52689.6	334.359	GST	92.864	43748.5	206.038	UDP-GT	94.708	47826.7	1526.1	ACPB
94.425	48090.7	281.053	LDH	94.704	41455.5	535.834	GST	93.171	43658.9	224.868	UDP-GT	94.708	34974.3	1513.86	ACPB
94.425	46273.3	250.318	LDH	94.704	53865.2	362.963	GST	93.478	43395.6	246.88	UDP-GT	94.708	45681.3	1433.55	ACPB
94.425	46861.8	230.506	LDH	94.704	42336.7	548.222	GST	93.784	41842.2	261.142	UDP-GT	94.708	39102.3	759.977	ACPB
94.425	49606.5	465.219	LDH	94.704	64247.3	954.413	GST	94.091	42875.7	258.538	UDP-GT	94.708	43294.6	1745.71	ACPB
94.436	45220.9	839.492	LDH	94.717	46035.2	643.015	GST	94.398	42242.2	237.808	UDP-GT	94.71	41410.4	164.13	ACPB
94.436	34616.3	307.486	LDH	94.717	34259.7	761.455	GST	94.705	42451.5	206.41	UDP-GT	94.71	35687.2	23.396	ACPB
94.728	44241.8	607.615	LDH	72	272372	5800.83	NTRC	72	68021.4	1794.86	SOD3.1
94.728	49536.5	503.068	LDH	72	346693	7319.8	NTRC	72.307	67276.3	1850.98	SOD3.1
94.728	46276	411.569	LDH	72	254788	4837.78	NTRC	72.613	67391.3	1912.34	SOD3.1
94.728	53141.8	293.4	LDH	72	384102	7958.29	NTRC	72.92	66255.3	1970.47	SOD3.1
94.728	55344	479.167	LDH	72	358614	8327.69	NTRC	73.227	65766	2015.57	SOD3.1
94.728	57206.4	726.423	LDH	72	247928	5718.48	NTRC	73.533	66171.4	2034.44	SOD3.1
94.728	39178.1	112.03	LDH	72	344802	8438.76	NTRC	73.84	65398.3	2011.83	SOD3.1
94.728	44683.9	399.16	LDH	72	397969	9327.67	NTRC	74.146	64230.2	1937.57	SOD3.1
94.728	60288.3	871.205	LDH	72	432288	10585	NTRC	74.453	63543.2	1815.25	SOD3.1
94.728	48685.8	839.627	LDH	72	379051	8442.72	NTRC	74.76	63830.4	1666.18	SOD3.1
94.728	40240.1	260.368	LDH	72	317618	7634.58	NTRC	75.066	63472.3	1525.29	SOD3.1
94.728	51806.9	830.854	LDH	72	438103	9618.96	NTRC	75.373	62450.3	1430.96	SOD3.1
94.728	48073.8	250.575	LDH	72	382332	9078.29	NTRC	75.679	62179.1	1412.49	SOD3.1
94.728	45126.1	244.433	LDH	72	313177	6900.47	NTRC	75.986	62655.5	1478.83	SOD3.1
94.728	47269.3	221.316	LDH	72	346854	8401.56	NTRC	76.293	62153.9	1612.22	SOD3.1
94.728	50008.8	472.831	LDH	72	294670	7019.91	NTRC	76.599	61306.7	1770.56	SOD3.1
94.739	44442.6	869.114	LDH	72	386997	9094.69	NTRC	76.906	61116.7	1899.48	SOD3.1
94.739	35408.4	303.268	LDH	72	355427	8128.3	NTRC	77.212	60303.1	1951.33	SOD3.1
72.001	361422	7751.35	Hsp.17.6	72.307	270247	5889.23	NTRC	77.519	60277	1903.16	SOD3.1
72.001	350547	7171.22	Hsp.17.6	72.307	345021	7442	NTRC	77.826	58226	1766.02	SOD3.1
72.001	338195	8002.19	Hsp.17.6	72.307	253380	4998.92	NTRC	78.132	59524.7	1579.81	SOD3.1
72.001	366580	7980.28	Hsp.17.6	72.307	381875	8119.09	NTRC	78.439	57689.2	1395.29	SOD3.1
72.001	407295	9050.01	Hsp.17.6	72.307	356562	8450.85	NTRC	78.745	58388.1	1251.47	SOD3.1
72.001	428946	10627.3	Hsp.17.6	72.307	245323	5813.98	NTRC	79.052	58506.8	1161.08	SOD3.1
72.001	342857	8129.8	Hsp.17.6	72.307	342176	8536.91	NTRC	79.359	57498.5	1112.25	SOD3.1
72.001	376473	8869.01	Hsp.17.6	72.307	394767	9478.56	NTRC	79.665	56872.3	1084.2	SOD3.1
72.001	382221	8789.56	Hsp.17.6	72.307	430668	10746.3	NTRC	79.972	56854.8	1064.57	SOD3.1
72.001	404238	9714.31	Hsp.17.6	72.307	376764	8554.25	NTRC	80.278	56511.1	1056.79	SOD3.1
72.001	475793	11853.7	Hsp.17.6	72.307	315039	7751.14	NTRC	80.585	56134.9	1073.6	SOD3.1
72.001	406595	9423.98	Hsp.17.6	72.307	435874	9786.82	NTRC	80.892	56328	1123.35	SOD3.1
72.001	406191	9052.79	Hsp.17.6	72.307	379605	9229.34	NTRC	81.198	55378.8	1198.8	SOD3.1
72.001	360289	8134.21	Hsp.17.6	72.307	311421	7026.14	NTRC	81.505	55277.6	1275.54	SOD3.1
72.001	350634	9984.24	Hsp.17.6	72.307	344746	8538.5	NTRC	81.811	55343.2	1321.36	SOD3.1
72.001	403756	9963.23	Hsp.17.6	72.307	292543	7116.98	NTRC	82.118	54412.9	1311.94	SOD3.1
72.002	257982	5138.98	Hsp.17.6	72.307	384572	9208.96	NTRC	82.425	53163.9	1244.01	SOD3.1
72.002	246937	5951.45	Hsp.17.6	72.307	353429	8322.44	NTRC	82.731	53719.8	1138.16	SOD3.1
72.305	358937	7946.72	Hsp.17.6	72.614	269471	6000.06	NTRC	83.038	53431	1026.11	SOD3.1
72.305	349015	7367.65	Hsp.17.6	72.614	343442	7587.3	NTRC	83.344	53172.6	929.253	SOD3.1
72.305	257165	5297.33	Hsp.17.6	72.614	252462	5169.8	NTRC	83.651	52630.8	887.772	SOD3.1
72.305	335898	8164.54	Hsp.17.6	72.614	379541	8311.39	NTRC	83.957	52313.9	897.361	SOD3.1
72.305	365004	8185.8	Hsp.17.6	72.614	355218	8619.48	NTRC	84.264	52625.6	934.508	SOD3.1
72.305	245056	6070.07	Hsp.17.6	72.614	243917	5913.57	NTRC	84.571	51718.3	967.565	SOD3.1
72.305	404924	9210.09	Hsp.17.6	72.614	341042	8634.86	NTRC	84.877	51517.5	968.997	SOD3.1
72.305	425913	10789.8	Hsp.17.6	72.614	392808	9644.19	NTRC	85.184	50733.8	925.445	SOD3.1
72.305	340283	8254.38	Hsp.17.6	72.614	428863	10930.6	NTRC	85.49	50903	842.515	SOD3.1
72.305	374082	9013.36	Hsp.17.6	72.614	374784	8686.39	NTRC	85.797	49899.6	742.398	SOD3.1
72.305	380011	8936.7	Hsp.17.6	72.614	313333	7885.05	NTRC	86.104	50273.2	653.806	SOD3.1
72.305	401840	9886.81	Hsp.17.6	72.614	433758	9992.2	NTRC	86.41	49903.2	598.617	SOD3.1
72.305	472710	12061.7	Hsp.17.6	72.614	377533	9401.31	NTRC	86.717	49985.9	581.756	SOD3.1
72.305	403598	9604.79	Hsp.17.6	72.614	309804	7178.65	NTRC	87.023	49119.6	590.457	SOD3.1
72.305	403808	9261.87	Hsp.17.6	72.614	341479	8657.04	NTRC	87.33	48856.7	603.453	SOD3.1
72.305	358825	8321.72	Hsp.17.6	72.614	290038	7202.16	NTRC	87.637	48669.1	603.089	SOD3.1
72.305	349066	10062.8	Hsp.17.6	72.614	381713	9345.31	NTRC	87.943	48743.8	582.091	SOD3.1
72.305	400483	10143.8	Hsp.17.6	72.614	350381	8489.34	NTRC	88.25	48143.3	542.44	SOD3.1
72.608	357192	8133.12	Hsp.17.6	72.921	267380	6149.95	NTRC	88.556	48097.4	491.346	SOD3.1
72.608	347818	7590.87	Hsp.17.6	72.921	340484	7757.77	NTRC	88.863	47447.2	440.504	SOD3.1
72.608	254454	5460.27	Hsp.17.6	72.921	250328	5350.03	NTRC	89.17	47257.8	406.777	SOD3.1
72.608	333763	8355.95	Hsp.17.6	72.921	378235	8541.34	NTRC	89.476	47959	407.876	SOD3.1
72.608	363051	8397.75	Hsp.17.6	72.921	353124	8844.05	NTRC	89.783	46631.7	450.319	SOD3.1
72.608	243944	6199.61	Hsp.17.6	72.921	242864	6022.38	NTRC	90.089	47321	517.239	SOD3.1
72.608	403097	9376.55	Hsp.17.6	72.921	336727	8729.46	NTRC	90.396	46774.5	568.585	SOD3.1
72.608	423683	10946.1	Hsp.17.6	72.921	390160	9820.25	NTRC	90.703	45375	559.495	SOD3.1
72.608	338751	8384.29	Hsp.17.6	72.921	423851	11125.7	NTRC	91.009	45606	467.923	SOD3.1
72.608	372191	9185.4	Hsp.17.6	72.921	371404	8852.85	NTRC	91.316	46060.7	313.906	SOD3.1
72.608	377910	9120.06	Hsp.17.6	72.921	311442	8032.16	NTRC	91.622	45398.4	156.996	SOD3.1
72.608	398129	10081.4	Hsp.17.6	72.921	431034	10236.5	NTRC	91.929	44964.3	72.107	SOD3.1
72.608	469494	12278.5	Hsp.17.6	72.921	375407	9629.56	NTRC	92.236	45920.6	115.465	SOD3.1
72.608	400401	9792.47	Hsp.17.6	72.921	307398	7363.42	NTRC	92.542	45410.5	297.014	SOD3.1
72.608	401418	9489.83	Hsp.17.6	72.921	338766	8752.94	NTRC	92.849	44673.5	572.411	SOD3.1
72.608	355920	8528.89	Hsp.17.6	72.921	287933	7282.98	NTRC	93.155	44579.5	860.453	SOD3.1
72.608	347816	10220.5	Hsp.17.6	72.921	379672	9517.24	NTRC	93.462	43187.9	1073.21	SOD3.1
72.608	397610	10300.5	Hsp.17.6	72.921	347070	8622.06	NTRC	93.769	43386.8	1160.27	SOD3.1
72.911	354314	8311.73	Hsp.17.6	73.228	265987	6347.11	NTRC	94.075	42973.8	1160.87	SOD3.1
72.911	344271	7839.21	Hsp.17.6	73.228	339090	7950.05	NTRC	94.382	43549.5	1116	SOD3.1
72.911	332113	8564.23	Hsp.17.6	73.228	249176	5539.04	NTRC	94.688	42437.9	1074	SOD3.1
72.911	359368	8609.75	Hsp.17.6	73.228	375251	8825.06	NTRC	72	433223	8453.11	SOD3.1
72.911	399089	9552.53	Hsp.17.6	73.228	349763	9160.54	NTRC	72.307	430764	8709.94	SOD3.1
72.911	419832	11082.2	Hsp.17.6	73.228	240346	6145.41	NTRC	72.613	428202	8968.56	SOD3.1
72.911	335519	8516.96	Hsp.17.6	73.228	334466	8825.41	NTRC	72.92	425344	9226.53	SOD3.1
72.911	369385	9380.66	Hsp.17.6	73.228	386442	10002	NTRC	73.227	421936	9488.09	SOD3.1
72.911	375559	9347.32	Hsp.17.6	73.228	420839	11321.2	NTRC	73.533	419234	9760.22	SOD3.1
72.911	396632	10284.2	Hsp.17.6	73.228	369779	9062.19	NTRC	73.84	415927	10045.9	SOD3.1
72.911	465954	12502.7	Hsp.17.6	73.228	308884	8185	NTRC	74.146	412216	10338.9	SOD3.1
72.911	398143	9984.43	Hsp.17.6	73.228	427695	10550	NTRC	74.453	409265	10742	SOD3.1
72.911	399087	9752.72	Hsp.17.6	73.228	372408	9893.2	NTRC	74.76	404986	11121.6	SOD3.1
72.911	353398	8749.18	Hsp.17.6	73.228	305645	7596.88	NTRC	75.066	401323	11440.6	SOD3.1
72.911	344636	10469.5	Hsp.17.6	73.228	336942	8844.28	NTRC	75.373	397614	11687.8	SOD3.1
72.911	393864	10429.2	Hsp.17.6	73.228	286345	7386.51	NTRC	75.679	393408	11864.1	SOD3.1
72.912	254218	5631.36	Hsp.17.6	73.228	376751	9743.28	NTRC	75.986	390228	11980.4	SOD3.1
72.912	242056	6336.17	Hsp.17.6	73.228	345125	8761.33	NTRC	76.293	385331	12050.3	SOD3.1
73.214	351643	8495.83	Hsp.17.6	73.535	263479	6628.18	NTRC	76.599	381860	12085	SOD3.1
73.214	342270	8105.04	Hsp.17.6	73.535	336170	8182.41	NTRC	76.906	379278	12090.4	SOD3.1
73.214	329556	8770.33	Hsp.17.6	73.535	247222	5734.96	NTRC	77.212	373758	12069.9	SOD3.1
73.214	357074	8822.81	Hsp.17.6	73.535	372128	9218.8	NTRC	77.519	370227	12029.9	SOD3.1
73.214	396694	9746.33	Hsp.17.6	73.535	346373	9586.1	NTRC	77.826	366213	11980.7	SOD3.1
73.214	415478	11198.5	Hsp.17.6	73.535	238824	6310.09	NTRC	78.132	362857	11933.5	SOD3.1
73.214	333254	8655.06	Hsp.17.6	73.535	332795	8947.41	NTRC	78.439	359367	11895.2	SOD3.1
73.214	367032	9588.97	Hsp.17.6	73.535	383716	10215.3	NTRC	78.745	355204	11869.6	SOD3.1
73.214	372712	9616.36	Hsp.17.6	73.535	417979	11522.7	NTRC	79.052	350728	11867.6	SOD3.1
73.214	393202	10479	Hsp.17.6	73.535	366983	9328.77	NTRC	79.359	346996	11922.2	SOD3.1
73.214	461386	12740.6	Hsp.17.6	73.535	305878	8374.85	NTRC	79.665	344224	12107	SOD3.1
73.214	394891	10179.8	Hsp.17.6	73.535	424041	10946.8	NTRC	79.972	339921	12561.2	SOD3.1
73.214	394864	10065.3	Hsp.17.6	73.535	368559	10152	NTRC	80.278	335991	13528.3	SOD3.1
73.214	351296	8973.69	Hsp.17.6	73.535	302867	7902.86	NTRC	80.585	332348	15405.3	SOD3.1
73.214	340454	10802.6	Hsp.17.6	73.535	333557	8958.42	NTRC	80.892	328982	18779.3	SOD3.1
73.214	391344	10544.9	Hsp.17.6	73.535	283710	7543.39	NTRC	81.198	324430	24402.4	SOD3.1
73.215	251145	5815.47	Hsp.17.6	73.535	373671	10084.4	NTRC	81.505	319951	33051.9	SOD3.1
73.215	239907	6475.88	Hsp.17.6	73.535	341914	8909.74	NTRC	81.811	316062	45244.5	SOD3.1
73.517	348474	8704.22	Hsp.17.6	73.842	262054	6975.86	NTRC	82.118	309021	60848.8	SOD3.1
73.517	340151	8374.65	Hsp.17.6	73.842	333202	8454.77	NTRC	82.425	298255	78740.2	SOD3.1
73.517	325537	8954.55	Hsp.17.6	73.842	244996	5982.28	NTRC	82.731	279840	96700.6	SOD3.1
73.517	354111	9042.02	Hsp.17.6	73.842	369351	9599.27	NTRC	83.038	246307	111735	SOD3.1
73.517	393145	9965.89	Hsp.17.6	73.842	343634	10024.2	NTRC	83.344	200266	120809	SOD3.1
73.517	412716	11325.5	Hsp.17.6	73.842	236948	6492.19	NTRC	83.651	150394	121772	SOD3.1
73.517	330058	8803.11	Hsp.17.6	73.842	329492	9091.77	NTRC	83.957	109285	114107	SOD3.1
73.517	363054	9797.82	Hsp.17.6	73.842	380861	10428.3	NTRC	84.264	77166.9	99140.3	SOD3.1
73.517	369068	9915.15	Hsp.17.6	73.842	413777	11767.9	NTRC	84.571	62026.8	79621.2	SOD3.1
73.517	389154	10652.6	Hsp.17.6	73.842	363536	9679.62	NTRC	84.877	56972.4	58846.2	SOD3.1
73.517	457680	12999.4	Hsp.17.6	73.842	303631	8552.27	NTRC	85.184	55901.9	39721.2	SOD3.1
73.517	391622	10375.2	Hsp.17.6	73.842	420726	11335.4	NTRC	85.49	55443.4	24119.7	SOD3.1
73.517	393018	10432.2	Hsp.17.6	73.842	365607	10393.8	NTRC	85.797	55079	12712.2	SOD3.1
73.517	347969	9191.54	Hsp.17.6	73.842	300213	8204.3	NTRC	86.104	54654.8	6830.19	SOD3.1
73.517	337308	11196.4	Hsp.17.6	73.842	331647	9094.27	NTRC	86.41	54988.4	3776.46	SOD3.1
73.517	387401	10673.2	Hsp.17.6	73.842	281507	7744.96	NTRC	86.717	54717.2	2142.57	SOD3.1
73.518	250089	6015.93	Hsp.17.6	73.842	370613	10447.5	NTRC	87.023	53476.4	1349.39	SOD3.1
73.518	237768	6616.19	Hsp.17.6	73.842	340666	9089.37	NTRC	87.33	52787.5	984.015	SOD3.1
73.82	346744	8948.56	Hsp.17.6	74.149	259230	7309.74	NTRC	87.637	52731.5	798.967	SOD3.1
73.82	337554	8631.61	Hsp.17.6	74.149	330929	8696.27	NTRC	87.943	52932.8	672.325	SOD3.1
73.82	323153	9104.2	Hsp.17.6	74.149	243963	6227.28	NTRC	88.25	52831.6	559.011	SOD3.1
73.82	351410	9268.22	Hsp.17.6	74.149	366301	9928.63	NTRC	88.556	51525	451.555	SOD3.1
73.82	390850	10211.8	Hsp.17.6	74.149	341038	10429.2	NTRC	88.863	51833.2	357.53	SOD3.1
73.82	409503	11482.9	Hsp.17.6	74.149	235090	6654.21	NTRC	89.17	52022.5	290.387	SOD3.1
73.82	327356	8961.93	Hsp.17.6	74.149	326307	9237.43	NTRC	89.476	51689	264.676	SOD3.1
73.82	360366	9996.27	Hsp.17.6	74.149	376874	10614.9	NTRC	89.783	51630.3	289.488	SOD3.1
73.82	366037	10224.6	Hsp.17.6	74.149	410359	12001.2	NTRC	90.089	51840.2	360.813	SOD3.1
73.82	385771	10826.3	Hsp.17.6	74.149	360650	10013.2	NTRC	90.396	51530.7	458.758	SOD3.1
73.82	453935	13336.5	Hsp.17.6	74.149	300081	8714.99	NTRC	90.703	49845.9	553.438	SOD3.1
73.82	388213	10563.9	Hsp.17.6	74.149	417155	11689.8	NTRC	91.009	50178.2	617.213	SOD3.1
73.82	388914	10840.4	Hsp.17.6	74.149	363078	10611.1	NTRC	91.316	50419.6	635.985	SOD3.1
73.82	345250	9391.49	Hsp.17.6	74.149	297940	8470.46	NTRC	91.622	48716.6	613.273	SOD3.1
73.82	334008	11615.6	Hsp.17.6	74.149	328303	9252.35	NTRC	91.929	49855.9	566.064	SOD3.1
73.82	385086	10863	Hsp.17.6	74.149	279662	7974.63	NTRC	92.236	48724.6	516.196	SOD3.1
73.822	247901	6231.77	Hsp.17.6	74.149	367690	10785	NTRC	92.542	49197.8	482.259	SOD3.1
73.822	235596	6756.07	Hsp.17.6	74.149	336723	9308.1	NTRC	92.849	48475.7	474.766	SOD3.1
74.124	344337	9223.49	Hsp.17.6	74.455	256961	7592.9	NTRC	93.155	48323.4	494.983	SOD3.1
74.124	333388	8862.44	Hsp.17.6	74.455	328633	8890.45	NTRC	93.462	48403.1	536.332	SOD3.1
74.124	320394	9217.92	Hsp.17.6	74.455	241538	6454.9	NTRC	93.769	47559.4	587.389	SOD3.1
74.124	349142	9491.58	Hsp.17.6	74.455	362926	10180.8	NTRC	94.075	47222.2	635.855	SOD3.1
74.124	387168	10473.1	Hsp.17.6	74.455	337355	10757.6	NTRC	94.382	47420.5	672.405	SOD3.1
74.124	405582	11661.5	Hsp.17.6	74.455	232179	6776.48	NTRC	94.688	46287.7	693.299	SOD3.1
74.124	325341	9139.53	Hsp.17.6	74.455	324310	9363.8	NTRC	72	396838	9023.69	RBOHF
74.124	356824	10195.5	Hsp.17.6	74.455	373473	10768.6	NTRC	72.306	394783	9178.11	RBOHF
74.124	362645	10539.6	Hsp.17.6	74.455	406952	12212.8	NTRC	72.612	392481	9357.44	RBOHF
74.124	381616	10983.3	Hsp.17.6	74.455	357267	10290.4	NTRC	72.919	389624	9604.95	RBOHF
74.124	449853	13731.8	Hsp.17.6	74.455	298170	8864.99	NTRC	73.225	385923	9887.02	RBOHF
74.124	384721	10739.8	Hsp.17.6	74.455	413050	11990.7	NTRC	73.531	384134	10164.5	RBOHF
74.124	386076	11258.5	Hsp.17.6	74.455	359848	10801.7	NTRC	73.838	379573	10418.1	RBOHF
74.124	341355	9578.4	Hsp.17.6	74.455	294914	8679.21	NTRC	74.144	376213	10630.4	RBOHF
74.124	330488	12016.8	Hsp.17.6	74.455	326242	9419.18	NTRC	74.45	373522	10791.5	RBOHF
74.124	381197	11124.2	Hsp.17.6	74.455	276979	8198.42	NTRC	74.756	369528	10904	RBOHF
74.125	245732	6456.21	Hsp.17.6	74.455	363776	11048.6	NTRC	75.063	366044	10982.4	RBOHF
74.125	233581	6918.47	Hsp.17.6	74.455	334233	9551.68	NTRC	75.369	362251	11047.7	RBOHF
74.427	340566	9505.3	Hsp.17.6	74.762	253719	7802.22	NTRC	75.675	359672	11116.9	RBOHF
74.427	330714	9061.51	Hsp.17.6	74.762	323955	9034.08	NTRC	75.982	356011	11195.6	RBOHF
74.427	317098	9303.4	Hsp.17.6	74.762	238862	6655.85	NTRC	76.288	352926	11278.3	RBOHF
74.427	345050	9725.42	Hsp.17.6	74.762	359732	10351.9	NTRC	76.594	348566	11357	RBOHF
74.427	383205	10763.1	Hsp.17.6	74.762	333134	10980.9	NTRC	76.901	344977	11431.5	RBOHF
74.427	402526	11850.5	Hsp.17.6	74.762	230032	6854.08	NTRC	77.207	341985	11515.8	RBOHF
74.427	321559	9339.28	Hsp.17.6	74.762	320081	9450.86	NTRC	77.513	338158	11639	RBOHF
74.427	353599	10400	Hsp.17.6	74.762	370265	10891.7	NTRC	77.819	335142	11850.1	RBOHF
74.427	359140	10874.2	Hsp.17.6	74.762	402814	12389.7	NTRC	78.126	331039	12232	RBOHF
74.427	379535	11111.2	Hsp.17.6	74.762	353180	10487.2	NTRC	78.432	326975	12929.7	RBOHF
74.427	445709	14086.8	Hsp.17.6	74.762	295217	9002.91	NTRC	78.738	324562	14190.8	RBOHF
74.427	380615	10947.5	Hsp.17.6	74.762	409765	12228.8	NTRC	79.045	320050	16403.1	RBOHF
74.427	381654	11756.7	Hsp.17.6	74.762	355375	10967.6	NTRC	79.351	316109	20103.8	RBOHF
74.427	338945	9774.28	Hsp.17.6	74.762	291397	8824.43	NTRC	79.657	312150	25925.4	RBOHF
74.427	327017	12354.3	Hsp.17.6	74.762	322049	9576.57	NTRC	79.963	307653	34439.7	RBOHF
74.427	377863	11409.6	Hsp.17.6	74.762	273969	8379.73	NTRC	80.27	303470	45903.7	RBOHF
74.428	243551	6677.68	Hsp.17.6	74.762	359662	11209.1	NTRC	80.576	295115	59964.3	RBOHF
74.428	231276	7086.77	Hsp.17.6	74.762	330427	9792.6	NTRC	80.882	283411	75448.4	RBOHF
74.73	336842	9797.05	Hsp.17.6	75.069	251464	7931.97	NTRC	81.189	264875	90382.7	RBOHF
74.73	328743	9243.36	Hsp.17.6	75.069	322021	9136.14	NTRC	81.495	232033	102328	RBOHF
74.73	314570	9387.32	Hsp.17.6	75.069	237320	6825.14	NTRC	81.801	192090	108978	RBOHF
74.73	341560	9934.34	Hsp.17.6	75.069	355557	10462.5	NTRC	82.108	150017	108836	RBOHF
74.73	379613	11074.4	Hsp.17.6	75.069	328961	11093.5	NTRC	82.414	109623	101692	RBOHF
74.73	397725	12025.5	Hsp.17.6	75.069	227892	6900.3	NTRC	82.72	81233.8	88718.2	RBOHF
74.73	318202	9505.13	Hsp.17.6	75.069	317228	9488.31	NTRC	83.026	61785.9	72115.5	RBOHF
74.73	350835	10569	Hsp.17.6	75.069	366126	10993.8	NTRC	83.333	53987.5	54469	RBOHF
74.73	355167	11142.2	Hsp.17.6	75.069	398268	12521.2	NTRC	83.639	52399.7	38068.2	RBOHF
74.73	375618	11211.2	Hsp.17.6	75.069	350234	10599.7	NTRC	83.945	50522	24433.3	RBOHF
74.73	439474	14361.9	Hsp.17.6	75.069	291870	9123.54	NTRC	84.252	50267.2	14171.1	RBOHF
74.73	377422	11132	Hsp.17.6	75.069	405088	12404.3	NTRC	84.558	49707.8	7735.22	RBOHF
74.73	377544	12173	Hsp.17.6	75.069	352274	11111.4	NTRC	84.864	49271.6	4478.86	RBOHF
74.73	335515	9925.16	Hsp.17.6	75.069	288778	8915.76	NTRC	85.171	49111.1	2591.4	RBOHF
74.73	322578	12587.7	Hsp.17.6	75.069	319199	9710.82	NTRC	85.477	49009.5	1577.06	RBOHF
74.73	374045	11679.2	Hsp.17.6	75.069	270712	8494.74	NTRC	85.783	48296	1065.92	RBOHF
74.732	241369	6933.6	Hsp.17.6	75.069	356016	11266.7	NTRC	86.089	47905.3	820.208	RBOHF
74.732	229176	7236.41	Hsp.17.6	75.069	328570	10003.6	NTRC	86.396	47906.9	706.396	RBOHF
75.033	334444	10052.1	Hsp.17.6	75.376	249406	7989.63	NTRC	86.702	48084.4	657.802	RBOHF
75.033	324750	9431.79	Hsp.17.6	75.376	319277	9209.88	NTRC	87.008	47661.1	642.271	RBOHF
75.033	311481	9465.61	Hsp.17.6	75.376	234934	6961.94	NTRC	87.315	46567.2	641.722	RBOHF
75.033	339278	10079.5	Hsp.17.6	75.376	352316	10548.1	NTRC	87.621	47314	643.662	RBOHF
75.033	376361	11313.8	Hsp.17.6	75.376	325915	11113.1	NTRC	87.927	46617.7	640.052	RBOHF
75.033	394236	12161.7	Hsp.17.6	75.376	225424	6940.22	NTRC	88.233	46129.8	628.076	RBOHF
75.033	315308	9622.95	Hsp.17.6	75.376	314583	9480.27	NTRC	88.54	46299.6	609.531	RBOHF
75.033	347295	10693.8	Hsp.17.6	75.376	362924	11084.7	NTRC	88.846	46120	589.103	RBOHF
75.033	352515	11320.4	Hsp.17.6	75.376	394491	12604.2	NTRC	89.152	45569.8	572.529	RBOHF
75.033	371726	11280.9	Hsp.17.6	75.376	346382	10641.6	NTRC	89.459	45111.5	565.089	RBOHF
75.033	435860	14538.1	Hsp.17.6	75.376	289462	9215.53	NTRC	89.765	45925.1	569.75	RBOHF
75.033	373947	11296.7	Hsp.17.6	75.376	400592	12523.7	NTRC	90.071	45061.4	585.457	RBOHF
75.033	373652	12458.8	Hsp.17.6	75.376	349502	11232.1	NTRC	90.378	44878.3	607.219	RBOHF
75.033	332864	10037.8	Hsp.17.6	75.376	285948	8970.11	NTRC	90.684	44225.6	628.636	RBOHF
75.033	317202	12691.2	Hsp.17.6	75.376	316703	9816.85	NTRC	90.99	44154.2	645.122	RBOHF
75.033	370303	11894	Hsp.17.6	75.376	268502	8539.39	NTRC	91.296	44408.6	654.988	RBOHF
75.035	239363	7170.81	Hsp.17.6	75.376	352328	11248.8	NTRC	91.603	43783.2	657.456	RBOHF
75.035	226928	7353.26	Hsp.17.6	75.376	323785	10167.7	NTRC	91.909	43304.1	650.208	RBOHF
75.336	330517	10214.6	Hsp.17.6	75.683	245633	7989.14	NTRC	92.215	43047.2	629.495	RBOHF
75.336	322463	9592.85	Hsp.17.6	75.683	316363	9265.25	NTRC	92.522	42976.1	593.079	RBOHF
75.336	308457	9536.53	Hsp.17.6	75.683	232657	7068.42	NTRC	92.828	42834.6	543.259	RBOHF
75.336	334279	10168.7	Hsp.17.6	75.683	349695	10642.4	NTRC	93.134	42332.8	487.547	RBOHF
75.336	372679	11461.2	Hsp.17.6	75.683	322434	11069.5	NTRC	93.44	42518.5	436.29	RBOHF
75.336	390605	12244.5	Hsp.17.6	75.683	223746	6996.7	NTRC	93.747	42019.7	398.578	RBOHF
75.336	312786	9689.01	Hsp.17.6	75.683	310757	9442.96	NTRC	94.053	42794.9	378.438	RBOHF
75.336	343128	10768.5	Hsp.17.6	75.683	359597	11166.5	NTRC	94.359	41610.1	373.176	RBOHF
75.336	347856	11395.5	Hsp.17.6	75.683	390504	12641.6	NTRC	94.666	41821.2	374.878	RBOHF
75.336	368003	11320.9	Hsp.17.6	75.683	343043	10635.8	NTRC	72	435211	9312.31	RBOHF
75.336	430552	14623.5	Hsp.17.6	75.683	285939	9266.77	NTRC	72.306	433156	9533.52	RBOHF
75.336	370429	11442.3	Hsp.17.6	75.683	397536	12594.1	NTRC	72.612	430346	9761.8	RBOHF
75.336	368659	12610.5	Hsp.17.6	75.683	345926	11323.5	NTRC	72.919	427197	9997.2	RBOHF
75.336	328724	10126.1	Hsp.17.6	75.683	283275	9000.98	NTRC	73.225	423716	10292.9	RBOHF
75.336	315315	12656.2	Hsp.17.6	75.683	312983	9895.65	NTRC	73.531	421132	10645.2	RBOHF
75.336	366559	12032.9	Hsp.17.6	75.683	265221	8526.85	NTRC	73.838	417926	11018.2	RBOHF
75.338	236144	7359.49	Hsp.17.6	75.683	348967	11194	NTRC	74.144	414102	11391.6	RBOHF
75.338	224142	7425.53	Hsp.17.6	75.683	321173	10282.1	NTRC	74.45	410006	11733.8	RBOHF
75.639	327677	10286.5	Hsp.17.6	75.99	243781	7945.14	NTRC	74.756	407113	12013.8	RBOHF
75.639	318959	9727.16	Hsp.17.6	75.99	312916	9305.6	NTRC	75.063	402672	12213.8	RBOHF
75.639	305556	9598.32	Hsp.17.6	75.99	230048	7147.49	NTRC	75.369	398664	12336	RBOHF
75.639	332452	10222.7	Hsp.17.6	75.99	346405	10760	NTRC	75.675	394814	12400.4	RBOHF
75.639	367898	11512.2	Hsp.17.6	75.99	318683	10990.2	NTRC	75.982	391277	12435.6	RBOHF
75.639	386436	12272.8	Hsp.17.6	75.99	221136	7077.41	NTRC	76.288	387645	12465.4	RBOHF
75.639	308893	9708	Hsp.17.6	75.99	308475	9398.26	NTRC	76.594	383595	12502.1	RBOHF
75.639	340354	10797	Hsp.17.6	75.99	355760	11229.4	NTRC	76.901	380436	12547.7	RBOHF
75.639	343708	11373.3	Hsp.17.6	75.99	386701	12640.3	NTRC	77.207	375696	12604.3	RBOHF
75.639	363970	11341.8	Hsp.17.6	75.99	339485	10605.6	NTRC	77.513	372377	12688.9	RBOHF
75.639	427016	14645.7	Hsp.17.6	75.99	283337	9271.5	NTRC	77.819	367575	12845.9	RBOHF
75.639	366398	11563.4	Hsp.17.6	75.99	393684	12619.1	NTRC	78.126	364918	13158.5	RBOHF
75.639	365279	12651.7	Hsp.17.6	75.99	341552	11378.3	NTRC	78.432	361095	13763.8	RBOHF
75.639	325485	10206.9	Hsp.17.6	75.99	280339	9013.13	NTRC	78.738	356454	14880.8	RBOHF
75.639	310481	12489.1	Hsp.17.6	75.99	310177	9950.46	NTRC	79.045	353107	16846.1	RBOHF
75.639	361684	12097.6	Hsp.17.6	75.99	263253	8478.24	NTRC	79.351	348203	20142.4	RBOHF
75.641	234153	7498.19	Hsp.17.6	75.99	345414	11135.6	NTRC	79.657	345139	25382.1	RBOHF
75.641	221422	7449.41	Hsp.17.6	75.99	317442	10354.8	NTRC	79.963	339315	33205.9	RBOHF
75.942	322647	10287.3	Hsp.17.6	76.297	241027	7870.67	NTRC	80.27	333945	44070.2	RBOHF
75.942	315289	9833.41	Hsp.17.6	76.297	310010	9331.24	NTRC	80.576	327119	57947.6	RBOHF
75.942	302096	9646.35	Hsp.17.6	76.297	228513	7201.55	NTRC	80.882	316603	74037.2	RBOHF
75.942	328571	10262.5	Hsp.17.6	76.297	342970	10890.5	NTRC	81.189	300749	90638.6	RBOHF
75.942	364500	11481.8	Hsp.17.6	76.297	315055	10891.9	NTRC	81.495	271636	105332	RBOHF
75.942	382177	12254.5	Hsp.17.6	76.297	219499	7170.4	NTRC	81.801	231451	115493	RBOHF
75.942	305270	9688.02	Hsp.17.6	76.297	304704	9365.78	NTRC	82.108	184624	119012	RBOHF
75.942	336128	10793.4	Hsp.17.6	76.297	352136	11255.9	NTRC	82.414	138445	114949	RBOHF
75.942	340335	11281.6	Hsp.17.6	76.297	382613	12608.6	NTRC	82.72	101738	103852	RBOHF
75.942	360879	11361	Hsp.17.6	76.297	336236	10569.5	NTRC	83.026	75068.8	87602.6	RBOHF
75.942	421735	14635.4	Hsp.17.6	76.297	279359	9234.42	NTRC	83.333	60706.3	68854.6	RBOHF
75.942	362005	11650.5	Hsp.17.6	76.297	388626	12599.8	NTRC	83.639	55430.6	50288.3	RBOHF
75.942	360784	12622.3	Hsp.17.6	76.297	338394	11395	NTRC	83.945	54334.9	33975.9	RBOHF
75.942	322970	10292.7	Hsp.17.6	76.297	277007	9004.35	NTRC	84.252	53597.7	21049.8	RBOHF
75.942	306148	12205.7	Hsp.17.6	76.297	306317	9982.66	NTRC	84.558	52309.3	11721.5	RBOHF
75.942	358428	12107.1	Hsp.17.6	76.297	260231	8414.68	NTRC	84.864	51611.4	6649.27	RBOHF
75.945	231293	7591.79	Hsp.17.6	76.297	342343	11089.7	NTRC	85.171	51997	3793.56	RBOHF
75.945	219761	7430.45	Hsp.17.6	76.297	314573	10395.7	NTRC	85.477	51389.6	2180.7	RBOHF
76.246	321074	10243.7	Hsp.17.6	76.604	238597	7777.41	NTRC	85.783	51198.5	1341.17	RBOHF
76.246	313080	9910.78	Hsp.17.6	76.604	307042	9343.58	NTRC	86.089	50490.9	951.012	RBOHF
76.246	299879	9675.61	Hsp.17.6	76.604	225447	7231.93	NTRC	86.396	51136.8	809.754	RBOHF
76.246	325879	10296.5	Hsp.17.6	76.604	339106	11006.5	NTRC	86.702	50679.6	798.151	RBOHF
76.246	360855	11399.8	Hsp.17.6	76.604	311793	10780.6	NTRC	87.008	50374	841.604	RBOHF
76.246	378880	12199	Hsp.17.6	76.604	216844	7249.99	NTRC	87.315	48791.1	890.004	RBOHF
76.246	303853	9635.07	Hsp.17.6	76.604	301912	9355.16	NTRC	87.621	49327.8	912.336	RBOHF
76.246	333804	10778.5	Hsp.17.6	76.604	348089	11229.5	NTRC	87.927	48612.8	896.667	RBOHF
76.246	336500	11162.2	Hsp.17.6	76.604	377752	12556.8	NTRC	88.233	48680.8	847.3	RBOHF
76.246	357890	11391.9	Hsp.17.6	76.604	332853	10537.7	NTRC	88.54	48173.4	777.461	RBOHF
76.246	416842	14612.3	Hsp.17.6	76.604	277253	9167.93	NTRC	88.846	47806	701.354	RBOHF
76.246	359798	11694.2	Hsp.17.6	76.604	385189	12541	NTRC	89.152	47662.8	629.531	RBOHF
76.246	357169	12563.3	Hsp.17.6	76.604	334283	11381.4	NTRC	89.459	47731.5	568.146	RBOHF
76.246	319873	10381.1	Hsp.17.6	76.604	274041	8971.51	NTRC	89.765	47113.9	520.047	RBOHF
76.246	303475	11831.7	Hsp.17.6	76.604	303986	9990.4	NTRC	90.071	47498	486.289	RBOHF
76.246	355858	12083.3	Hsp.17.6	76.604	256912	8352.83	NTRC	90.378	46421	467.552	RBOHF
76.248	230012	7646.98	Hsp.17.6	76.604	338275	11056.3	NTRC	90.684	47150.6	465.327	RBOHF
76.248	217457	7380.48	Hsp.17.6	76.604	311366	10408.9	NTRC	90.99	46310.1	481.928	RBOHF
76.549	317924	10178	Hsp.17.6	76.911	235921	7677.79	NTRC	91.296	46570.1	518.6	RBOHF
76.549	309432	9958.77	Hsp.17.6	76.911	304217	9346.71	NTRC	91.603	45969.2	572.511	RBOHF
76.549	296119	9681.64	Hsp.17.6	76.911	223712	7239.54	NTRC	91.909	46186.4	634.75	RBOHF
76.549	322240	10317.6	Hsp.17.6	76.911	335579	11079.3	NTRC	92.215	45314.4	691.476	RBOHF
76.549	357346	11301.8	Hsp.17.6	76.911	308296	10659	NTRC	92.522	45120.5	728.962	RBOHF
76.549	375331	12112.5	Hsp.17.6	76.911	214039	7289.99	NTRC	92.828	44526.7	740.126	RBOHF
76.549	299764	9552.51	Hsp.17.6	76.911	300190	9364.16	NTRC	93.134	44418.2	728.701	RBOHF
76.549	329963	10768.4	Hsp.17.6	76.911	344541	11145.6	NTRC	93.44	44348	707.871	RBOHF
76.549	334014	11054.8	Hsp.17.6	76.911	374669	12497.9	NTRC	93.747	44255.2	693.681	RBOHF
76.549	354075	11432.1	Hsp.17.6	76.911	328977	10513.1	NTRC	94.053	43773.5	697.251	RBOHF
76.549	413300	14577.5	Hsp.17.6	76.911	274089	9086.14	NTRC	94.359	43447.9	720.563	RBOHF
76.549	354860	11691.3	Hsp.17.6	76.911	380349	12456.2	NTRC	94.666	43429.6	757.708	RBOHF
76.549	352974	12504.2	Hsp.17.6	76.911	331557	11351.2	NTRC	72	556495	13025	UDP-GT
76.549	316313	10450.4	Hsp.17.6	76.911	271126	8915.15	NTRC	72.307	553526	13309.6	UDP-GT
76.549	298493	11404.6	Hsp.17.6	76.911	300840	9970.89	NTRC	72.613	549658	13597.6	UDP-GT
76.549	351049	12039.5	Hsp.17.6	76.911	255189	8303.81	NTRC	72.92	545087	13871.4	UDP-GT
76.551	226656	7669.25	Hsp.17.6	76.911	334555	11027.8	NTRC	73.226	540922	14124.9	UDP-GT
76.551	214437	7312.62	Hsp.17.6	76.911	307675	10392.3	NTRC	73.533	536407	14390.2	UDP-GT
76.852	313857	10102.2	Hsp.17.6	77.217	233065	7586.09	NTRC	73.839	532180	14687.8	UDP-GT
76.852	306517	9976.25	Hsp.17.6	77.217	300662	9344.16	NTRC	74.146	527568	14960.8	UDP-GT
76.852	293052	9660.89	Hsp.17.6	77.217	331578	11093.7	NTRC	74.452	522845	15198.6	UDP-GT
76.852	318781	10309.5	Hsp.17.6	77.217	304113	10535.4	NTRC	74.759	517209	15395.2	UDP-GT
76.852	353771	11215.3	Hsp.17.6	77.217	295817	9383.87	NTRC	75.066	512865	15558.6	UDP-GT
76.852	371272	11999.7	Hsp.17.6	77.217	341015	11019.3	NTRC	75.372	507859	15707.8	UDP-GT
76.852	296809	9445.33	Hsp.17.6	77.217	370888	12447.6	NTRC	75.679	503243	15860.8	UDP-GT
76.852	326820	10767.5	Hsp.17.6	77.217	326382	10494.3	NTRC	75.985	498630	16020.3	UDP-GT
76.852	329869	10981.1	Hsp.17.6	77.217	271511	9000.38	NTRC	76.292	493535	16167.9	UDP-GT
76.852	349939	11462.2	Hsp.17.6	77.217	377304	12366.4	NTRC	76.598	488932	16272.6	UDP-GT
76.852	408434	14516	Hsp.17.6	77.217	327940	11317.3	NTRC	76.905	483198	16307	UDP-GT
76.852	351060	11647.7	Hsp.17.6	77.217	268893	8841.14	NTRC	77.211	477640	16263.2	UDP-GT
76.852	349327	12458	Hsp.17.6	77.217	297088	9926.1	NTRC	77.518	473717	16159.2	UDP-GT
76.852	313214	10467.9	Hsp.17.6	77.217	252414	8274.27	NTRC	77.825	467675	16033.4	UDP-GT
76.852	295340	10971.9	Hsp.17.6	77.217	331457	11001.9	NTRC	78.131	463651	15934.4	UDP-GT
76.852	347256	11977.3	Hsp.17.6	77.217	305020	10345.4	NTRC	78.438	458531	15916.2	UDP-GT
76.855	223856	7662.1	Hsp.17.6	77.218	220884	7225.58	NTRC	78.744	454218	16048.5	UDP-GT
76.855	212469	7237.21	Hsp.17.6	77.218	211748	7276.9	NTRC	79.051	448298	16449.1	UDP-GT
77.155	310814	10019.7	Hsp.17.6	77.524	231519	7518.81	NTRC	79.357	444332	17342.7	UDP-GT
77.155	302863	9962.37	Hsp.17.6	77.524	298724	9336.8	NTRC	79.664	439787	19134.8	UDP-GT
77.155	290811	9612.4	Hsp.17.6	77.524	328631	11054.1	NTRC	79.97	433114	22482.8	UDP-GT
77.155	315668	10259.5	Hsp.17.6	77.524	301253	10427.7	NTRC	80.277	429888	28309.9	UDP-GT
77.155	349789	11150.1	Hsp.17.6	77.524	292797	9410.83	NTRC	80.583	424142	37693.7	UDP-GT
77.155	366920	11868.4	Hsp.17.6	77.524	337060	10887	NTRC	80.89	418548	51564.4	UDP-GT
77.155	292969	9324.84	Hsp.17.6	77.524	365819	12423	NTRC	81.197	411519	70224.2	UDP-GT
77.155	323149	10766.5	Hsp.17.6	77.524	322152	10481.3	NTRC	81.503	402103	92818.8	UDP-GT
77.155	326632	10937.8	Hsp.17.6	77.524	268322	8921.61	NTRC	81.81	384682	117022	UDP-GT
77.155	346622	11454.2	Hsp.17.6	77.524	372898	12295.1	NTRC	82.116	351757	139207	UDP-GT
77.155	403902	14407.7	Hsp.17.6	77.524	324142	11287.1	NTRC	82.423	293495	155223	UDP-GT
77.155	347281	11577.5	Hsp.17.6	77.524	265261	8762.14	NTRC	82.729	228797	161580	UDP-GT
77.155	345206	12424.3	Hsp.17.6	77.524	293629	9870.55	NTRC	83.036	165533	156592	UDP-GT
77.155	309234	10407.3	Hsp.17.6	77.524	249844	8270.46	NTRC	83.342	115710	140981	UDP-GT
77.155	292287	10580.6	Hsp.17.6	77.524	328138	10990.9	NTRC	83.649	83360.5	117651	UDP-GT
77.155	343682	11891	Hsp.17.6	77.524	300579	10285.1	NTRC	83.956	71039.1	90739.9	UDP-GT
77.158	221884	7627.57	Hsp.17.6	77.525	219323	7193.28	NTRC	84.262	67294.1	64384.5	UDP-GT
77.158	210852	7160.71	Hsp.17.6	77.525	209281	7217.2	NTRC	84.569	66637.2	41678.3	UDP-GT
77.458	307962	9931.78	Hsp.17.6	77.831	228769	7493.97	NTRC	84.875	66365.6	24180.7	UDP-GT
77.458	299944	9918.8	Hsp.17.6	77.831	295360	9326.44	NTRC	85.182	66411.9	12594.9	UDP-GT
77.458	286966	9540.16	Hsp.17.6	77.831	325600	10986.2	NTRC	85.488	65187.7	6895.29	UDP-GT
77.458	312076	10168.1	Hsp.17.6	77.831	298291	10362.7	NTRC	85.795	65147.6	3625.46	UDP-GT
77.458	347163	11096.1	Hsp.17.6	77.831	290003	9458.98	NTRC	86.101	64504.5	1925.31	UDP-GT
77.458	363141	11733.4	Hsp.17.6	77.831	334424	10803.6	NTRC	86.408	64936.6	1140.67	UDP-GT
77.458	291008	9209.47	Hsp.17.6	77.831	363620	12443.5	NTRC	86.714	64646	843.613	UDP-GT
77.458	320070	10747.8	Hsp.17.6	77.831	319742	10484.3	NTRC	87.021	64711.9	779.175	UDP-GT
77.458	322982	10903.3	Hsp.17.6	77.831	265613	8869.53	NTRC	87.328	62946.5	801.21	UDP-GT
77.458	343242	11387.2	Hsp.17.6	77.831	369922	12265.3	NTRC	87.634	62636.5	828.697	UDP-GT
77.458	398235	14241.2	Hsp.17.6	77.831	321126	11266.9	NTRC	87.941	62949.5	824.32	UDP-GT
77.458	344099	11497	Hsp.17.6	77.831	262671	8702.28	NTRC	88.247	62344.5	782.705	UDP-GT
77.458	340996	12395.4	Hsp.17.6	77.831	291668	9837.39	NTRC	88.554	61570.3	718.382	UDP-GT
77.458	305679	10266.7	Hsp.17.6	77.831	246628	8305.72	NTRC	88.86	61991.2	652.117	UDP-GT
77.458	289239	10260.9	Hsp.17.6	77.831	323848	11028.8	NTRC	89.167	61721.6	599.801	UDP-GT
77.458	339866	11774.7	Hsp.17.6	77.831	297661	10256.5	NTRC	89.473	60907.5	567.435	UDP-GT
77.461	219677	7567.36	Hsp.17.6	77.832	216252	7151	NTRC	89.78	61041.2	552.395	UDP-GT
77.461	207887	7086.5	Hsp.17.6	77.832	207746	7137.63	NTRC	90.086	60788.3	548.327	UDP-GT
77.761	303765	9843.32	Hsp.17.6	78.138	226102	7532.07	NTRC	90.393	59883.1	550.309	UDP-GT
77.761	297220	9851.72	Hsp.17.6	78.138	292380	9326.53	NTRC	90.7	60288.3	557.654	UDP-GT
77.761	283593	9455.34	Hsp.17.6	78.138	215117	7115.03	NTRC	91.006	59721.3	573.351	UDP-GT
77.761	307979	10049.7	Hsp.17.6	78.138	321219	10936.2	NTRC	91.313	59485.4	600.852	UDP-GT
77.761	342912	11032.8	Hsp.17.6	78.138	294920	10374.1	NTRC	91.619	59036.9	640.278	UDP-GT
77.761	360208	11612.2	Hsp.17.6	78.138	204850	7081.81	NTRC	91.926	58960.5	685.881	UDP-GT
77.761	287958	9119.91	Hsp.17.6	78.138	287176	9566.39	NTRC	92.232	58332.3	726.296	UDP-GT
77.761	316690	10694.7	Hsp.17.6	78.138	329904	10837.8	NTRC	92.539	58029.3	748.031	UDP-GT
77.761	319296	10851.9	Hsp.17.6	78.138	358862	12537.8	NTRC	92.845	57410.5	741.534	UDP-GT
77.761	338264	11258.3	Hsp.17.6	78.138	315585	10533.5	NTRC	93.152	56817.6	706.881	UDP-GT
77.761	394477	14022.7	Hsp.17.6	78.138	262277	8883.14	NTRC	93.459	56858.6	655.375	UDP-GT
77.761	340172	11415.8	Hsp.17.6	78.138	366072	12306.8	NTRC	93.765	57258.2	604.864	UDP-GT
77.761	337054	12364.2	Hsp.17.6	78.138	317205	11277.5	NTRC	94.072	56224.2	571.049	UDP-GT
77.761	302744	10074.7	Hsp.17.6	78.138	260251	8707.67	NTRC	94.378	56275	560.301	UDP-GT
77.761	286470	10015.5	Hsp.17.6	78.138	287850	9883.41	NTRC	94.685	56001.1	568.419	UDP-GT
77.761	336111	11626.3	Hsp.17.6	78.138	244845	8412.58	NTRC	72	407123	9189.35	UDP-GT
77.765	217565	7484.65	Hsp.17.6	78.138	320838	11172.5	NTRC	72.307	404747	9342.47	UDP-GT
77.765	205234	7016.44	Hsp.17.6	78.138	295126	10335.9	NTRC	72.613	402521	9521.54	UDP-GT
78.065	301760	9762.73	Hsp.17.6	78.445	224599	7661.23	NTRC	72.92	399619	9723.49	UDP-GT
78.065	292937	9770.97	Hsp.17.6	78.445	289008	9373.76	NTRC	73.226	396329	9940.89	UDP-GT
78.065	282155	9376.69	Hsp.17.6	78.445	211792	7112.59	NTRC	73.533	393352	10213.2	UDP-GT
78.065	306298	9924.57	Hsp.17.6	78.445	318302	10975.6	NTRC	73.839	390484	10491.3	UDP-GT
78.065	339029	10944.5	Hsp.17.6	78.445	291443	10507.1	NTRC	74.146	386169	10726.4	UDP-GT
78.065	356644	11515.3	Hsp.17.6	78.445	202706	7107.94	NTRC	74.452	382908	10906.5	UDP-GT
78.065	285064	9073.28	Hsp.17.6	78.445	284105	9797.37	NTRC	74.759	379158	11033.8	UDP-GT
78.065	312564	10600.2	Hsp.17.6	78.445	328214	11074.5	NTRC	75.066	375782	11120.5	UDP-GT
78.065	315930	10769.8	Hsp.17.6	78.445	355275	12756.7	NTRC	75.372	372490	11179.8	UDP-GT
78.065	335793	11085.8	Hsp.17.6	78.445	312220	10686.5	NTRC	75.679	369561	11219.1	UDP-GT
78.065	389946	13774.7	Hsp.17.6	78.445	260204	9029.29	NTRC	75.985	364657	11240.5	UDP-GT
78.065	336814	11330.9	Hsp.17.6	78.445	360950	12476.1	NTRC	76.292	361837	11245.2	UDP-GT
78.065	333307	12328.6	Hsp.17.6	78.445	315034	11376.6	NTRC	76.598	358215	11238.1	UDP-GT
78.065	299562	9881.27	Hsp.17.6	78.445	257316	8860.55	NTRC	76.905	355214	11227.8	UDP-GT
78.065	282948	9822.79	Hsp.17.6	78.445	285633	10095.7	NTRC	77.211	350936	11224.5	UDP-GT
78.065	333117	11449.7	Hsp.17.6	78.445	242177	8659.18	NTRC	77.518	347786	11238.2	UDP-GT
78.068	213715	7387.08	Hsp.17.6	78.445	317994	11506.9	NTRC	77.825	344195	11276	UDP-GT
78.068	204275	6952.37	Hsp.17.6	78.445	292129	10629.4	NTRC	78.131	340863	11344.3	UDP-GT
78.368	298572	9700.14	Hsp.17.6	78.752	221773	7930.76	NTRC	78.438	337306	11459	UDP-GT
78.368	290970	9685.96	Hsp.17.6	78.752	286209	9537.22	NTRC	78.744	333967	11669.3	UDP-GT
78.368	277822	9328.07	Hsp.17.6	78.752	210731	7183.9	NTRC	79.051	329681	12098.9	UDP-GT
78.368	303030	9809.09	Hsp.17.6	78.752	315529	11209.6	NTRC	79.357	325690	12995	UDP-GT
78.368	335521	10836	Hsp.17.6	78.752	288907	10835	NTRC	79.664	323006	14775.9	UDP-GT
78.368	352994	11439.5	Hsp.17.6	78.752	201219	7291.99	NTRC	79.97	319598	18049.9	UDP-GT
78.368	282280	9077.06	Hsp.17.6	78.752	282322	10250.5	NTRC	80.277	315985	23576.4	UDP-GT
78.368	309706	10471.4	Hsp.17.6	78.752	325516	11634.2	NTRC	80.583	312187	32121.3	UDP-GT
78.368	312015	10666.7	Hsp.17.6	78.752	351662	13197.8	NTRC	80.89	307564	44182.2	UDP-GT
78.368	332014	10903.8	Hsp.17.6	78.752	309872	11038.8	NTRC	81.197	300944	59616.8	UDP-GT
78.368	386359	13527.7	Hsp.17.6	78.752	258181	9412.22	NTRC	81.503	292022	77305.8	UDP-GT
78.368	333237	11230.9	Hsp.17.6	78.752	358413	12884.3	NTRC	81.81	275072	95056.5	UDP-GT
78.368	329129	12290.2	Hsp.17.6	78.752	309730	11683.5	NTRC	82.116	243510	109920	UDP-GT
78.368	296982	9739.18	Hsp.17.6	78.752	254776	9296.73	NTRC	82.423	195320	118921	UDP-GT
78.368	279387	9698.61	Hsp.17.6	78.752	282619	10605.4	NTRC	82.729	146845	119972	UDP-GT
78.368	328564	11256.6	Hsp.17.6	78.752	239557	9169.42	NTRC	83.036	103722	112588	UDP-GT
78.371	212480	7288.32	Hsp.17.6	78.752	315313	12159.3	NTRC	83.342	72586	98078.1	UDP-GT
78.371	201368	6897.26	Hsp.17.6	78.752	289502	11278.9	NTRC	83.649	53828.8	79112.7	UDP-GT
78.671	295237	9667.39	Hsp.17.6	79.059	219370	8432.58	NTRC	83.956	48832.6	58882.3	UDP-GT
78.671	287895	9601.36	Hsp.17.6	79.059	284726	9925.27	NTRC	84.262	48006.1	40197.5	UDP-GT
78.671	275329	9335.12	Hsp.17.6	79.059	207946	7386.59	NTRC	84.569	46817.6	24879.1	UDP-GT
78.671	299241	9710.74	Hsp.17.6	79.059	312411	11793.6	NTRC	84.875	46863.7	13593.3	UDP-GT
78.671	331571	10739.4	Hsp.17.6	79.059	285165	11489.5	NTRC	85.182	47052.2	7118.17	UDP-GT
78.671	348706	11369.3	Hsp.17.6	79.059	199122	7738.52	NTRC	85.488	45780	3776.37	UDP-GT
78.671	278713	9143.01	Hsp.17.6	79.059	278285	11080.4	NTRC	85.795	46277.4	1941.62	UDP-GT
78.671	306368	10328.7	Hsp.17.6	79.059	320244	12712.2	NTRC	86.101	45920.9	1030.32	UDP-GT
78.671	308673	10581.1	Hsp.17.6	79.059	347534	14036.3	NTRC	86.408	45112.8	624.78	UDP-GT
78.671	328926	10751.8	Hsp.17.6	79.059	306536	11737.3	NTRC	86.714	45840.2	465.551	UDP-GT
78.671	381431	13312.1	Hsp.17.6	79.059	254968	10189.8	NTRC	87.021	44654.4	409.863	UDP-GT
78.671	328737	11107.5	Hsp.17.6	79.059	354501	13727.5	NTRC	87.328	44501.8	388.742	UDP-GT
78.671	325451	12252.5	Hsp.17.6	79.059	307884	12401.2	NTRC	87.634	44472.7	375.301	UDP-GT
78.671	293808	9685.83	Hsp.17.6	79.059	252227	10223.2	NTRC	87.941	44316.7	364.066	UDP-GT
78.671	275743	9589.9	Hsp.17.6	79.059	279637	11613.7	NTRC	88.247	44131	357.734	UDP-GT
78.671	325081	11068.8	Hsp.17.6	79.059	236692	10145	NTRC	88.554	43326	359.07	UDP-GT
78.674	210051	7205	Hsp.17.6	79.059	310919	13330.8	NTRC	88.86	43990.1	367.36	UDP-GT
78.674	199155	6855.91	Hsp.17.6	79.059	286180	12484.9	NTRC	89.167	42952.9	378.941	UDP-GT
78.974	291308	9682.88	Hsp.17.6	79.366	217389	9327.52	NTRC	89.473	43059.9	390.032	UDP-GT
78.974	284429	9515.45	Hsp.17.6	79.366	281459	10698.4	NTRC	89.78	42502.4	399.646	UDP-GT
78.974	273356	9424.14	Hsp.17.6	79.366	206517	7807.27	NTRC	90.086	42631	410.15	UDP-GT
78.974	296233	9632.97	Hsp.17.6	79.366	308873	12955.6	NTRC	90.393	41782.5	424.349	UDP-GT
78.974	329186	10712	Hsp.17.6	79.366	282120	12698.1	NTRC	90.7	42336.3	440.419	UDP-GT
78.974	345827	11288.1	Hsp.17.6	79.366	196974	8598.31	NTRC	91.006	42041.2	448.958	UDP-GT
78.974	276345	9288.46	Hsp.17.6	79.366	275248	12532.1	NTRC	91.313	40878.3	436.258	UDP-GT
78.974	303473	10200.2	Hsp.17.6	79.366	317424	14623.8	NTRC	91.619	39962.5	393.159	UDP-GT
78.974	305397	10577.3	Hsp.17.6	79.366	343897	15559.4	NTRC	91.926	41371.6	323.169	UDP-GT
78.974	325073	10677	Hsp.17.6	79.366	303244	13006.3	NTRC	92.232	40294.1	242.608	UDP-GT
78.974	377082	13156.4	Hsp.17.6	79.366	251797	11598.6	NTRC	92.539	41131.2	172.122	UDP-GT
78.974	325871	10971.8	Hsp.17.6	79.366	350996	15319.4	NTRC	92.845	39967.1	126.223	UDP-GT
78.974	321027	12219.4	Hsp.17.6	79.366	304116	13831.3	NTRC	93.152	39732	108.295	UDP-GT
78.974	290709	9735.98	Hsp.17.6	79.366	249703	11931.9	NTRC	93.459	40462.5	112.477	UDP-GT
78.974	273407	9498.91	Hsp.17.6	79.366	276308	13416.2	NTRC	93.765	39851.9	128.104	UDP-GT
78.974	322554	10919.9	Hsp.17.6	79.366	234920	11879.5	NTRC	94.072	39595.4	143.098	UDP-GT
78.978	207496	7149.67	Hsp.17.6	79.366	307000	15333.7	NTRC	94.378	39393.1	146.281	UDP-GT
78.978	196870	6836.7	Hsp.17.6	79.366	283114	14540.7	NTRC	94.685	38685.9	130.376	UDP-GT
79.277	289755	9778.47	Hsp.17.6	79.673	213478	10864.8	NTRC	72	389340	8083.24	SOD3.1
79.277	281334	9423.89	Hsp.17.6	79.673	277736	12091.7	NTRC	72.307	388837	8365.45	SOD3.1
79.277	269422	9626.26	Hsp.17.6	79.673	204169	8584.26	NTRC	72.613	386321	8644.97	SOD3.1
79.277	293223	9585.02	Hsp.17.6	79.673	305370	15020.1	NTRC	72.92	382156	8901.54	SOD3.1
79.277	325304	10828.8	Hsp.17.6	79.673	277701	14808.5	NTRC	73.227	379716	9129.46	SOD3.1
79.277	341696	11208.1	Hsp.17.6	79.673	194097	10085.7	NTRC	73.533	376901	9337.46	SOD3.1
79.277	274124	9550.13	Hsp.17.6	79.673	272140	14965.8	NTRC	73.84	374857	9538.34	SOD3.1
79.277	299705	10116.5	Hsp.17.6	79.673	313536	17825.8	NTRC	74.146	370995	9738.65	SOD3.1
79.277	302630	10739	Hsp.17.6	79.673	339779	18188.7	NTRC	74.453	368158	9944.84	SOD3.1
79.277	322359	10690.7	Hsp.17.6	79.673	299081	15174	NTRC	74.76	364777	10163.4	SOD3.1
79.277	373834	13105.9	Hsp.17.6	79.673	249356	13970.6	NTRC	75.066	361483	10361.7	SOD3.1
79.277	321693	10867.7	Hsp.17.6	79.673	346616	18109.9	NTRC	75.373	358656	10541.9	SOD3.1
79.277	318135	12199.5	Hsp.17.6	79.673	301878	16373.7	NTRC	75.679	354762	10712.4	SOD3.1
79.277	288278	9890.75	Hsp.17.6	79.673	247134	14794	NTRC	75.986	351490	10879.5	SOD3.1
79.277	270313	9448.15	Hsp.17.6	79.673	273797	16410.2	NTRC	76.293	348719	11040.1	SOD3.1
79.277	318508	10856.3	Hsp.17.6	79.673	231529	14746.8	NTRC	76.599	345398	11179.3	SOD3.1
79.281	206464	7127.23	Hsp.17.6	79.673	303575	18608.7	NTRC	76.906	341819	11278.4	SOD3.1
79.281	195140	6854.04	Hsp.17.6	79.673	278511	17848.2	NTRC	77.212	337173	11326.4	SOD3.1
79.58	285980	10004.5	Hsp.17.6	79.979	212437	13377.6	NTRC	77.519	334541	11329	SOD3.1
79.58	279018	9327.19	Hsp.17.6	79.979	275167	14436.8	NTRC	77.826	330681	11305.9	SOD3.1
79.58	267239	9986.46	Hsp.17.6	79.979	302598	18412.9	NTRC	78.132	327825	11279.3	SOD3.1
79.58	290090	9588.61	Hsp.17.6	79.979	274656	18272.3	NTRC	78.439	323714	11261.6	SOD3.1
79.58	322202	11175.4	Hsp.17.6	79.979	268337	18840.6	NTRC	78.745	321572	11252.2	SOD3.1
79.58	338085	11145.6	Hsp.17.6	79.979	309872	22871.8	NTRC	79.052	316726	11246.9	SOD3.1
79.58	269465	9987.55	Hsp.17.6	79.979	335197	22461.7	NTRC	79.359	313357	11257.4	SOD3.1
79.58	297313	10109.5	Hsp.17.6	79.979	295528	18676.9	NTRC	79.665	310512	11333.6	SOD3.1
79.58	299034	11159.5	Hsp.17.6	79.979	245769	17717.1	NTRC	79.972	306608	11587.1	SOD3.1
79.58	319195	10850.8	Hsp.17.6	79.979	342412	22668.3	NTRC	80.278	303450	12215.8	SOD3.1
79.58	368778	13174	Hsp.17.6	79.979	297463	20499	NTRC	80.585	300367	13532.5	SOD3.1
79.58	318941	10883.1	Hsp.17.6	79.979	243254	19216.2	NTRC	80.892	297290	15986.5	SOD3.1
79.58	313601	12218	Hsp.17.6	79.979	269377	21051.8	NTRC	81.198	293684	20150.7	SOD3.1
79.58	284644	10163.6	Hsp.17.6	79.979	228580	19142.1	NTRC	81.505	289639	26634.6	SOD3.1
79.58	267457	9466.63	Hsp.17.6	79.979	299657	23682.5	NTRC	81.811	285651	35890	SOD3.1
79.58	315099	10941.5	Hsp.17.6	79.979	275245	22874.7	NTRC	82.118	279864	47924	SOD3.1
79.584	203087	7141.91	Hsp.17.6	79.98	201513	9934.81	NTRC	82.425	271317	62011.3	SOD3.1
79.584	193228	6933.65	Hsp.17.6	79.98	192243	12479	NTRC	82.731	256619	76560.9	SOD3.1
79.883	282390	10429.6	Hsp.17.6	80.286	208766	17234.2	NTRC	83.038	229081	89288	SOD3.1
79.883	274848	9240.51	Hsp.17.6	80.286	271584	18155.9	NTRC	83.344	191209	97730.8	SOD3.1
79.883	263493	10572.2	Hsp.17.6	80.286	297382	23618.2	NTRC	83.651	147067	99974.3	SOD3.1
79.883	287155	9684.16	Hsp.17.6	80.286	271903	23561.1	NTRC	83.957	107358	95295.6	SOD3.1
79.883	318489	11844.9	Hsp.17.6	80.286	265471	24625.4	NTRC	84.264	78120.9	84441.1	SOD3.1
79.883	334728	11142.5	Hsp.17.6	80.286	305781	30276.2	NTRC	84.571	60866	69396.1	SOD3.1
79.883	267342	10680.6	Hsp.17.6	80.286	331029	28941.8	NTRC	84.877	55305	52751.6	SOD3.1
79.883	293719	10210.1	Hsp.17.6	80.286	291914	24005.6	NTRC	85.184	52681.5	36946.1	SOD3.1
79.883	295557	11931.2	Hsp.17.6	80.286	242614	23245.4	NTRC	85.49	52241.4	23688.1	SOD3.1
79.883	315123	11247.3	Hsp.17.6	80.286	338119	29591.4	NTRC	85.797	52743.6	13731.4	SOD3.1
79.883	365280	13488	Hsp.17.6	80.286	293500	26669.3	NTRC	86.104	52320	7444.64	SOD3.1
79.883	315265	11164	Hsp.17.6	80.286	240469	25537.1	NTRC	86.41	51962	3967.95	SOD3.1
79.883	308919	12332	Hsp.17.6	80.286	266453	27742.8	NTRC	86.717	50603.7	2044.19	SOD3.1
79.883	281336	10621.9	Hsp.17.6	80.286	225372	25360.4	NTRC	87.023	51564.3	1075.83	SOD3.1
79.883	264242	9588.73	Hsp.17.6	80.286	294717	31035.9	NTRC	87.33	50938.7	622.521	SOD3.1
79.883	312260	11271.3	Hsp.17.6	80.286	270885	30021	NTRC	87.637	49763.2	410.67	SOD3.1
79.888	200458	7215.04	Hsp.17.6	80.287	198686	12168.1	NTRC	87.943	50106.2	297.402	SOD3.1
79.888	190289	7123.23	Hsp.17.6	80.287	189570	16082.3	NTRC	88.25	49641.4	223.226	SOD3.1
80.187	280206	11136.1	Hsp.17.6	80.593	206152	22734.4	NTRC	88.556	49638	171.125	SOD3.1
80.187	272843	9203.67	Hsp.17.6	80.593	268512	23692.2	NTRC	88.863	49576.1	137.332	SOD3.1
80.187	260817	11478.4	Hsp.17.6	80.593	293733	31058.7	NTRC	89.17	49162.4	115.236	SOD3.1
80.187	284542	9936.86	Hsp.17.6	80.593	266458	31004	NTRC	89.476	48594.1	92.872	SOD3.1
80.187	315506	12936.8	Hsp.17.6	80.593	260270	32629.5	NTRC	89.783	48532.9	60.62	SOD3.1
80.187	331320	11295.8	Hsp.17.6	80.593	300845	40296.2	NTRC	90.089	47681.8	20.294	SOD3.1
80.187	264717	11725.8	Hsp.17.6	80.593	325762	38035.8	NTRC	90.396	47899.6	-13.945	SOD3.1
80.187	291012	10479.1	Hsp.17.6	80.593	286782	31566.3	NTRC	90.703	48878.3	-25.981	SOD3.1
80.187	292896	13140.7	Hsp.17.6	80.593	238134	30802	NTRC	91.009	47990.8	-12.064	SOD3.1
80.187	312228	12036	Hsp.17.6	80.593	332541	39313.2	NTRC	91.316	47122.4	13.881	SOD3.1
80.187	361890	14201.9	Hsp.17.6	80.593	288310	35191.5	NTRC	91.622	46980	29.844	SOD3.1
80.187	312163	11939.4	Hsp.17.6	80.593	235173	33866	NTRC	91.929	45902	23.183	SOD3.1
80.187	305964	12650.8	Hsp.17.6	80.593	260706	36649.2	NTRC	92.236	47306.3	0.74	SOD3.1
80.187	277932	11436.2	Hsp.17.6	80.593	221443	33431.9	NTRC	92.542	46726.2	-17.074	SOD3.1
80.187	262028	9896.56	Hsp.17.6	80.593	289997	40888.5	NTRC	92.849	46819.5	-12.663	SOD3.1
80.187	309681	12007.7	Hsp.17.6	80.593	265900	39411.2	NTRC	93.155	45601.6	16.54	SOD3.1
80.191	198353	7407.15	Hsp.17.6	80.594	196582	15654	NTRC	93.462	45473.1	58.904	SOD3.1
80.191	188586	7510	Hsp.17.6	80.594	186394	21134.5	NTRC	93.769	45544.9	98.979	SOD3.1
80.49	277555	12215.1	Hsp.17.6	80.9	201207	29960.4	NTRC	94.075	45797.1	127.042	SOD3.1
80.49	270400	9294.15	Hsp.17.6	80.9	262863	31360.3	NTRC	94.382	44365.5	141.271	SOD3.1
80.49	257978	12827.7	Hsp.17.6	80.9	287703	40898.9	NTRC	94.688	44691.3	144.615	SOD3.1
80.49	281437	10459	Hsp.17.6	80.9	261333	40571.7	NTRC	72	364667	7530.82	SOD3.1
80.49	311510	14561.3	Hsp.17.6	80.9	255450	42785.7	NTRC	72.307	363418	7732.36	SOD3.1
80.49	328452	11859.6	Hsp.17.6	80.9	293581	52686.6	NTRC	72.613	360895	7957.15	SOD3.1
80.49	262038	13242.3	Hsp.17.6	80.9	319100	49744.9	NTRC	72.92	358593	8204.24	SOD3.1
80.49	287819	11025.5	Hsp.17.6	80.9	281644	41467.2	NTRC	73.227	355862	8468.01	SOD3.1
80.49	289474	14876.2	Hsp.17.6	80.9	232748	40270.3	NTRC	73.533	353772	8735.44	SOD3.1
80.49	308459	13503.8	Hsp.17.6	80.9	326226	51844.5	NTRC	73.84	350708	9034.42	SOD3.1
80.49	356444	15610.6	Hsp.17.6	80.9	282236	46016.4	NTRC	74.146	347283	9331.43	SOD3.1
80.49	309409	13554.9	Hsp.17.6	80.9	228644	43904.6	NTRC	74.453	344396	9564.46	SOD3.1
80.49	302667	13356.7	Hsp.17.6	80.9	254604	47500.5	NTRC	74.76	340972	9737.67	SOD3.1
80.49	274796	12926.7	Hsp.17.6	80.9	214204	42965.8	NTRC	75.066	337740	9872.95	SOD3.1
80.49	257908	10663.6	Hsp.17.6	80.9	282192	52958.9	NTRC	75.373	335246	9998.32	SOD3.1
80.49	304648	13427.8	Hsp.17.6	80.9	258870	50673.8	NTRC	75.679	332018	10135.1	SOD3.1
80.494	196987	7836.95	Hsp.17.6	80.901	194072	20725.3	NTRC	75.986	328916	10289.4	SOD3.1
80.494	186446	8244.14	Hsp.17.6	80.901	182067	27672.5	NTRC	76.293	325932	10454.2	SOD3.1
80.793	273083	13768.2	Hsp.17.6	81.207	196016	38625.9	NTRC	76.599	322000	10614.1	SOD3.1
80.793	266528	9645.2	Hsp.17.6	81.207	258753	41138.8	NTRC	76.906	319086	10750.2	SOD3.1
80.793	255338	14777.4	Hsp.17.6	81.207	280044	52821.9	NTRC	77.212	315629	10842.3	SOD3.1
80.793	277912	11447.7	Hsp.17.6	81.207	252670	51682.4	NTRC	77.519	313312	10872	SOD3.1
80.793	308719	16854.7	Hsp.17.6	81.207	246009	54469.8	NTRC	77.826	308384	10829.8	SOD3.1
80.793	325067	13085.4	Hsp.17.6	81.207	280399	66529.3	NTRC	78.132	304962	10723	SOD3.1
80.793	257727	15398.3	Hsp.17.6	81.207	308757	63429.7	NTRC	78.439	301756	10577.2	SOD3.1
80.793	284753	12058.8	Hsp.17.6	81.207	273063	53297.5	NTRC	78.745	299693	10431.8	SOD3.1
80.793	284780	17256.7	Hsp.17.6	81.207	224447	51002.7	NTRC	79.052	295554	10331	SOD3.1
80.793	305678	16097.3	Hsp.17.6	81.207	316325	66526.3	NTRC	79.359	292543	10323.5	SOD3.1
80.793	352945	18190.3	Hsp.17.6	81.207	272260	58546	NTRC	79.665	289549	10474	SOD3.1
80.793	305378	16498.9	Hsp.17.6	81.207	218926	54831.7	NTRC	79.972	286891	10892.3	SOD3.1
80.793	298724	14731.4	Hsp.17.6	81.207	243154	59455.2	NTRC	80.278	283359	11776.3	SOD3.1
80.793	272419	15584.4	Hsp.17.6	81.207	202450	53080.8	NTRC	80.585	280284	13456.8	SOD3.1
80.793	254958	12068.4	Hsp.17.6	81.207	270466	66303.7	NTRC	80.892	276751	16421.3	SOD3.1
80.793	302041	15967.4	Hsp.17.6	81.207	246307	62819.9	NTRC	81.198	273732	21276.4	SOD3.1
80.798	194569	8694.85	Hsp.17.6	81.208	190099	27518.5	NTRC	81.505	270207	28610.2	SOD3.1
80.798	184645	9561.55	Hsp.17.6	81.208	177155	35388.9	NTRC	81.811	265986	38744.9	SOD3.1
81.096	269581	15924.8	Hsp.17.6	81.514	186595	47990.2	NTRC	82.118	260040	51431.2	SOD3.1
81.096	264052	10470.8	Hsp.17.6	81.514	249914	52480.7	NTRC	82.425	250118	65611.3	SOD3.1
81.096	250632	17538.3	Hsp.17.6	81.514	185757	35799.5	NTRC	82.731	231992	79405.1	SOD3.1
81.096	275099	13229.2	Hsp.17.6	81.514	267905	65877.5	NTRC	83.038	201320	90430.1	SOD3.1
81.096	303402	20015.4	Hsp.17.6	81.514	239316	63132	NTRC	83.344	162536	96416.5	SOD3.1
81.096	321429	15399.9	Hsp.17.6	81.514	168138	43555.7	NTRC	83.651	120881	95915.6	SOD3.1
81.096	253692	18451.1	Hsp.17.6	81.514	231069	66454	NTRC	83.957	88650.1	88804.9	SOD3.1
81.096	280521	13933.6	Hsp.17.6	81.514	261061	80242	NTRC	84.264	63275.3	76355.1	SOD3.1
81.096	280318	20477.2	Hsp.17.6	81.514	292778	77711.6	NTRC	84.571	52982.8	60821	SOD3.1
81.096	301371	20415.3	Hsp.17.6	81.514	260885	66002.1	NTRC	84.877	49168.9	44738.1	SOD3.1
81.096	348422	22613.8	Hsp.17.6	81.514	209702	61787.6	NTRC	85.184	48283	30227.1	SOD3.1
81.096	301844	21381.6	Hsp.17.6	81.514	298044	81932.1	NTRC	85.49	47457	18566.2	SOD3.1
81.096	294811	17176.3	Hsp.17.6	81.514	257247	71553.8	NTRC	85.797	46950.2	10126.8	SOD3.1
81.096	268500	20036.8	Hsp.17.6	81.514	200804	65334.1	NTRC	86.104	47012.9	5747.63	SOD3.1
81.096	252088	14532	Hsp.17.6	81.514	225482	71126.4	NTRC	86.41	47230.1	3341.64	SOD3.1
81.096	298062	20218.6	Hsp.17.6	81.514	185557	62488.5	NTRC	86.717	46363	2034.64	SOD3.1
81.101	191821	10251.3	Hsp.17.6	81.514	249762	79344.9	NTRC	87.023	46135.7	1382.35	SOD3.1
81.101	181688	11790.7	Hsp.17.6	81.514	224696	74315.9	NTRC	87.33	46236.7	1074.42	SOD3.1
81.399	266044	18873.4	Hsp.17.6	81.821	170813	56907	NTRC	87.637	45320	927.045	SOD3.1
81.399	261992	12094.3	Hsp.17.6	81.821	236962	64246.8	NTRC	87.943	45388.9	851.208	SOD3.1
81.399	246600	21401.9	Hsp.17.6	81.821	177543	44855	NTRC	88.25	45414.5	815.563	SOD3.1
81.399	271126	16279.4	Hsp.17.6	81.821	248126	78513.4	NTRC	88.556	45567.4	813.258	SOD3.1
81.399	297169	24344.3	Hsp.17.6	81.821	217208	73236.5	NTRC	88.863	45206.6	838.497	SOD3.1
81.399	317902	19387.6	Hsp.17.6	81.821	153879	51080.3	NTRC	89.17	44895.3	876.488	SOD3.1
81.399	247699	22770.3	Hsp.17.6	81.821	207132	77068.5	NTRC	89.476	43829.8	906.585	SOD3.1
81.399	277595	17163.4	Hsp.17.6	81.821	231359	91823.3	NTRC	89.783	44274.3	912.526	SOD3.1
81.399	273169	24844.5	Hsp.17.6	81.821	266437	90617.1	NTRC	90.089	43503.1	890.716	SOD3.1
81.399	297961	27116.3	Hsp.17.6	81.821	238212	77958.1	NTRC	90.396	43827.3	850.399	SOD3.1
81.399	343959	29670.7	Hsp.17.6	81.821	187568	71021.4	NTRC	90.703	43522.1	806.563	SOD3.1
81.399	298122	28821.5	Hsp.17.6	81.821	270108	96017.8	NTRC	91.009	43532	771.377	SOD3.1
81.399	289849	21204	Hsp.17.6	81.821	233060	83309.5	NTRC	91.316	42632.3	750.107	SOD3.1
81.399	264704	26918.3	Hsp.17.6	81.821	177094	73829.4	NTRC	91.622	43149	742.634	SOD3.1
81.399	248433	18605.5	Hsp.17.6	81.821	198715	80809.6	NTRC	91.929	42746.8	747.18	SOD3.1
81.399	294083	26834.3	Hsp.17.6	81.821	160483	69737.1	NTRC	92.236	42200.5	762.452	SOD3.1
81.404	189893	12853.2	Hsp.17.6	81.821	220556	90136	NTRC	92.542	42758.1	786.783	SOD3.1
81.404	179452	15321.2	Hsp.17.6	81.821	196382	83373.3	NTRC	92.849	42142.3	816.321	SOD3.1
81.702	260108	22890.7	Hsp.17.6	82.128	149329	64029	NTRC	93.155	41307.2	844.682	SOD3.1
81.702	259015	14964	Hsp.17.6	82.128	214226	74841.7	NTRC	93.462	41815.5	864.81	SOD3.1
81.702	240605	26735.7	Hsp.17.6	82.128	163501	53530.5	NTRC	93.769	41444.6	871.856	SOD3.1
81.702	268413	21181.6	Hsp.17.6	82.128	218456	88838.3	NTRC	94.075	40688	865.099	SOD3.1
81.702	291084	30251.3	Hsp.17.6	82.128	187614	80200.2	NTRC	94.382	40870.2	848.113	SOD3.1
81.702	313707	25735.4	Hsp.17.6	82.128	133942	56717.1	NTRC	94.688	40782.7	827.182	SOD3.1
81.702	243143	28787.9	Hsp.17.6	82.128	178081	84558.6	NTRC	72	387350	8487.48	RBOHF
81.702	274414	22365.9	Hsp.17.6	82.128	196740	99300.4	NTRC	72.306	385361	8623.96	RBOHF
81.702	267161	30751.5	Hsp.17.6	82.128	232200	99984.2	NTRC	72.612	382966	8757.52	RBOHF
81.702	292862	36712.3	Hsp.17.6	82.128	209118	87283.4	NTRC	72.919	379999	8904.97	RBOHF
81.702	338616	40048.3	Hsp.17.6	82.128	159198	77073.7	NTRC	73.225	376469	9113.66	RBOHF
81.702	293157	39216.3	Hsp.17.6	82.128	234531	106534	NTRC	73.531	373596	9369.6	RBOHF
81.702	286151	27359.6	Hsp.17.6	82.128	201966	91924.4	NTRC	73.838	371463	9681.38	RBOHF
81.702	261319	36633.9	Hsp.17.6	82.128	148900	78833.9	NTRC	74.144	368635	10025.4	RBOHF
81.702	245141	24855.6	Hsp.17.6	82.128	168280	86868.8	NTRC	74.45	364934	10350.7	RBOHF
81.702	290636	36313.9	Hsp.17.6	82.128	134444	73555.9	NTRC	74.756	360986	10600.9	RBOHF
81.707	187492	16886.3	Hsp.17.6	82.128	186680	96814	NTRC	75.063	357001	10742.6	RBOHF
81.707	176861	20507.4	Hsp.17.6	82.128	165659	88383.3	NTRC	75.369	353821	10779.4	RBOHF
82.006	252887	28327.5	Hsp.17.6	82.435	125418	68123.9	NTRC	75.675	350558	10746.8	RBOHF
82.006	255279	19626.5	Hsp.17.6	82.435	184579	82552.3	NTRC	75.982	346969	10694.1	RBOHF
82.006	234038	33898.2	Hsp.17.6	82.435	142643	60445.5	NTRC	76.288	343821	10663.6	RBOHF
82.006	264480	28482.8	Hsp.17.6	82.435	184064	95066.3	NTRC	76.594	340479	10679.4	RBOHF
82.006	282888	38168.3	Hsp.17.6	82.435	155165	82605.1	NTRC	76.901	337380	10746	RBOHF
82.006	309705	35058.4	Hsp.17.6	82.435	112244	59386.1	NTRC	77.207	333969	10857.7	RBOHF
82.006	237977	36840.5	Hsp.17.6	82.435	145104	87533.8	NTRC	77.513	329937	11015.6	RBOHF
82.006	271272	30104.5	Hsp.17.6	82.435	158175	101242	NTRC	77.819	327063	11248.8	RBOHF
82.006	259909	38545.9	Hsp.17.6	82.435	193252	104025	NTRC	78.126	323338	11638.5	RBOHF
82.006	287259	49268.5	Hsp.17.6	82.435	173689	92301.9	NTRC	78.432	319216	12343.2	RBOHF
82.006	332838	53979.9	Hsp.17.6	82.435	128775	78732.7	NTRC	78.738	316410	13623.8	RBOHF
82.006	287014	52438.1	Hsp.17.6	82.435	193995	111585	NTRC	79.045	312954	15864.7	RBOHF
82.006	281220	36042.2	Hsp.17.6	82.435	166362	95826.8	NTRC	79.351	308960	19573.8	RBOHF
82.006	255919	49054.9	Hsp.17.6	82.435	120100	79360.4	NTRC	79.657	305422	25331.9	RBOHF
82.006	241538	33646.6	Hsp.17.6	82.435	138498	88157.4	NTRC	79.963	299979	33657.1	RBOHF
82.006	284875	48700.8	Hsp.17.6	82.435	109461	73186.3	NTRC	80.27	295001	44773.8	RBOHF
82.011	183837	22679.4	Hsp.17.6	82.435	151850	98091.5	NTRC	80.576	287775	58336.3	RBOHF
82.011	173101	27504.4	Hsp.17.6	82.435	132854	88348.9	NTRC	80.882	276588	73221.4	RBOHF
82.309	246174	35505.7	Hsp.17.6	82.741	100555	68396.8	NTRC	81.189	257017	87537.2	RBOHF
82.309	251197	26617.3	Hsp.17.6	82.741	153524	85982.1	NTRC	81.495	226237	98938	RBOHF
82.309	227780	43045.1	Hsp.17.6	82.741	149070	95992	NTRC	81.801	186919	105202	RBOHF
82.309	260052	38448	Hsp.17.6	82.741	124407	79840.5	NTRC	82.108	146232	104886	RBOHF
82.309	276163	48334.9	Hsp.17.6	82.741	115503	85350	NTRC	82.414	106395	97801.2	RBOHF
82.309	303755	47600.7	Hsp.17.6	82.741	124370	97160.6	NTRC	82.72	78893.6	85097.7	RBOHF
82.309	230605	46915.2	Hsp.17.6	82.741	156068	101840	NTRC	83.026	61060.7	68923.5	RBOHF
82.309	265533	40630.1	Hsp.17.6	82.741	140712	92004.5	NTRC	83.333	53654.8	51796.5	RBOHF
82.309	253254	48291.2	Hsp.17.6	82.741	102429	75563.4	NTRC	83.639	51241.7	35939.7	RBOHF
82.309	279271	64100.2	Hsp.17.6	82.741	154595	110142	NTRC	83.945	50542.1	22821	RBOHF
82.309	324812	70861.2	Hsp.17.6	82.741	133015	94197	NTRC	84.252	50607.2	13012.9	RBOHF
82.309	276918	67566.2	Hsp.17.6	82.741	93602.4	75196.8	NTRC	84.558	49670.9	7057.53	RBOHF
82.309	274365	47240.8	Hsp.17.6	82.741	108421	84325.5	NTRC	84.864	49859.8	4088.99	RBOHF
82.309	246810	63264.5	Hsp.17.6	82.741	85050.5	68588.1	NTRC	85.171	49172.1	2391.78	RBOHF
82.309	236333	44861	Hsp.17.6	82.741	118970	93611.3	NTRC	85.477	48412.2	1495.1	RBOHF
82.309	275068	63292.3	Hsp.17.6	82.741	104876	83159.9	NTRC	85.783	48626.3	1057.24	RBOHF
82.314	179401	30338.5	Hsp.17.6	82.742	118837	64335.5	NTRC	86.089	48115.5	863.856	RBOHF
82.314	168327	36069.3	Hsp.17.6	82.742	90528.4	58486.7	NTRC	86.396	48594.2	792.563	RBOHF
82.612	239066	44509.9	Hsp.17.6	83.048	79271.3	64704.4	NTRC	86.702	47234.7	774.813	RBOHF
[truncated: 2,105 more rows]

## Sheet: Standards -Melting curves
Gen	ACPB		PDC		ADH		GST		Hsp17.6		LDH		NTRC		SOD3.1		RBOHF		UDP
	T°	Derivative	T°	Derivative	T°	Derivative	T°	Derivative	T°	Derivative	T°	Derivative	T°	Derivative	T°	Derivative	T°	Derivative	T°	Derivative
	71.9994	58284.6	71.9987	30462.5	71.9995	14694.5	71.9996	8407.3	71.9995	13184.3	71.9996	13425.6	71.9993	12133.9	71.9992	5704.92	71.9993	52700.7	72.0003	7610.63
	71.9994	27714.9	71.9987	28628.8	71.9995	11439	71.9996	13332.8	71.9995	9505	71.9996	12542.5	71.9993	14630.3	71.9992	6377.09	71.9993	44299.1	72.0003	8450.22
	71.9994	62400.4	71.9987	41420.8	71.9995	15134.8	71.9996	12184.6	71.9995	12002.9	71.9996	12644.5	71.9993	12445.3	71.9992	6387.38	71.9993	62698.2	72.0003	8884.92
	71.9994	28550.6	71.9987	21829.8	71.9995	6459.03	71.9996	14016.6	71.9995	10153.2	71.9996	10896.6	71.9993	12574	71.9992	6758.43	71.9993	1235.23	72.0003	9186.74
	71.9994	71447.1	71.9987	37020	71.9995	16981.3	71.9996	12883.6	71.9995	11690.2	71.9996	13584.1	71.9993	15125.5	71.9992	6906.17	71.9993	55371.9	72.0003	9325.02
	71.9994	42675.4	71.9987	25697.7	71.9995	9219.55	71.9996	14445.5	71.9995	16144.5	71.9996	5481.97	71.9993	13114.3	71.9992	7239.64	71.9993	1257.55	72.0003	9428.2
	71.9994	55863.7	71.9987	5315.72	71.9995	12109	71.9996	12686.2	71.9995	12347.5	71.9996	15549.7	71.9993	11715.3	71.9992	7609.19	71.9993	49089.6	72.0003	9710.02
	71.9994	31312.6	71.9987	1228.36	71.9995	9692.03	71.9996	11352.9	71.9995	11902.9	71.9996	12662.3	71.9993	13985.9	71.9992	8419	71.9993	1309.34	72.0003	9979.24
	71.9994	55901.8	71.9987	34348.3	71.9995	11797	71.9996	12525.4	71.9995	14197.6	71.9996	12692.8	71.9993	12848.7	71.9992	8461.29	71.9993	53363.1	72.0003	10504
	71.9994	1975.04	71.9987	1437.39	71.9995	6183.56	71.9996	3194.61	71.9995	16863.7	71.9996	18096.5	71.9993	2696.57	71.9992	8542.89	71.9993	52002.5	72.0003	12414.7
	71.9994	44490.4	71.9987	37551.7	71.9995	13132.9	71.9996	12074.6	71.9995	14012.4	71.9996	23828.3	71.9993	12667.9	71.9992	8638.36	71.9993	54260.3	72.0003	13049.3
	71.9994	40717.3	71.9987	8757.76	71.9995	11203	71.9996	10332.9	71.9995	11891.4	71.9996	13469.9	71.9993	12968.8	71.9992	8765.9	71.9993	61039.3	72.0003	16541.3
	71.9994	39394.9	71.9987	25932	71.9995	7318.25	71.9996	12184.9	71.9995	14984.3	71.9996	12668.5	71.9993	15353.6	71.9992	12098.8	72.3062	53327.4	72.0003	18977.1
	72.2966	58037	72.2959	30661.2	72.2967	14773.9	72.2968	8576.99	72.2967	13218.7	72.2968	13493.2	72.2965	12200.5	72.2964	5863.99	72.3062	44622.4	72.2975	7623.15
	72.2966	27607.6	72.2959	28845.5	72.2967	12020.3	72.2968	13323.4	72.2967	9545.98	72.2968	12699	72.2965	14682.9	72.2964	6381.91	72.3062	62912.4	72.2975	8451.16
	72.2966	62115.4	72.2959	41761.3	72.2967	15278.3	72.2968	12180.7	72.2967	12057.3	72.2968	12711.7	72.2965	12456.8	72.2964	6448.6	72.3062	1220.23	72.2975	8958.18
	72.2966	28584.2	72.2959	22162.6	72.2967	7547.8	72.2968	14080	72.2967	10077.6	72.2968	11271.2	72.2965	12649.1	72.2964	6837.4	72.3062	55625.1	72.2975	9222.17
	72.2966	71172.4	72.2959	37384	72.2967	17183.6	72.2968	12977.2	72.2967	11811.9	72.2968	13681.9	72.2965	15205.6	72.2964	6967.42	72.3062	1214.36	72.2975	9275.31
	72.2966	42538.6	72.2959	25899.9	72.2967	10544.4	72.2968	14528.2	72.2967	15869.4	72.2968	7017.08	72.2965	13195.5	72.2964	7419.95	72.3062	49462.2	72.2975	9449.44
	72.2966	55683.2	72.2959	5608.7	72.2967	12519.2	72.2968	12743.9	72.2967	12504.3	72.2968	15698	72.2965	11837	72.2964	7628.58	72.3062	1326.6	72.2975	9850.74
	72.2966	31284.7	72.2959	1153.52	72.2967	10781.5	72.2968	11563.9	72.2967	11697.1	72.2968	12803.8	72.2965	14090.9	72.2964	8621.67	72.3062	53637.3	72.2975	9975.08
	72.2966	55475.2	72.2959	34616.9	72.2967	12110	72.2968	12627.9	72.2967	14218.9	72.2968	12846.2	72.2965	12940.1	72.2964	8782.93	72.3062	52190.4	72.2975	10636.2
	72.2966	1919.01	72.2959	1490.44	72.2967	7235.65	72.2968	3105.63	72.2967	16943.6	72.2968	18127.6	72.2965	2646.52	72.2964	8798	72.3062	54657.4	72.2975	12457.7
	72.2966	44296.2	72.2959	37744	72.2967	13450.3	72.2968	12121.9	72.2967	13975.6	72.2968	23730.4	72.2965	12579.7	72.2964	8936.63	72.3062	61511.3	72.2975	13089.3
	72.2966	40567.5	72.2959	8886.13	72.2967	11698.7	72.2968	10420.4	72.2967	11964.3	72.2968	13497.8	72.2965	12936	72.2964	9078.82	72.613	54084.6	72.2975	16504.3
	72.2966	39262.3	72.2959	26180.4	72.2967	9371.7	72.2968	12209.3	72.2967	14849.3	72.2968	12853.5	72.2965	15303.7	72.2964	12151.8	72.613	44914.4	72.2975	17653.3
	72.5938	57817.7	72.5932	30981.6	72.5938	14889.8	72.5939	8760.61	72.5939	13299.5	72.5939	13597.8	72.5937	12276.7	72.5935	5986.08	72.613	63184.5	72.5947	7645.6
	72.5938	27619.2	72.5932	29116.3	72.5938	12588.8	72.5939	13404.7	72.5939	9660.95	72.5939	12905.8	72.5937	14770.5	72.5935	6444.51	72.613	1223.68	72.5947	8453.5
	72.5938	61909.8	72.5932	42232	72.5938	15453.4	72.5939	12240.5	72.5939	12134.9	72.5939	12807.6	72.5937	12524.4	72.5935	6536.21	72.613	55787.2	72.5947	9044.63
	72.5938	28691.3	72.5932	22565.3	72.5938	8595.22	72.5939	14205.9	72.5939	10060.7	72.5939	11712.2	72.5937	12741.9	72.5935	6946.96	72.613	1174.83	72.5947	9250.69
	72.5938	70888.6	72.5932	37807.9	72.5938	17417.3	72.5939	13082.7	72.5939	12009.1	72.5939	13812.1	72.5937	15318.1	72.5935	7095.05	72.613	50125.4	72.5947	9254.44
	72.5938	42470.6	72.5932	26210.8	72.5938	11776.5	72.5939	14593.7	72.5939	15732.9	72.5939	8482.68	72.5937	13301	72.5935	7601.73	72.613	1292	72.5947	9513.04
	72.5938	55573	72.5932	5890.42	72.5938	12945.7	72.5939	12842.7	72.5939	12678.8	72.5939	15878.4	72.5937	11971	72.5935	7683.44	72.613	53847.8	72.5947	9923.2
	72.5938	31363	72.5932	1075.96	72.5938	11830.7	72.5939	11782	72.5939	11568.9	72.5939	12998.6	72.5937	14203.1	72.5935	8715.32	72.613	52330.4	72.5947	9979.11
	72.5938	55197.7	72.5932	34969	72.5938	12551.3	72.5939	12763.4	72.5939	14302.5	72.5939	13003.1	72.5937	13043.6	72.5935	8908.49	72.613	55055.9	72.5947	10808
	72.5938	1844.18	72.5932	1549.78	72.5938	8244.95	72.5939	3011.91	72.5939	17184.4	72.5939	18149.8	72.5937	2615.86	72.5935	9098.63	72.613	62013.6	72.5947	12520.5
	72.5938	44161.7	72.5932	38024.1	72.5938	13758.8	72.5939	12176.4	72.5939	14006.3	72.5939	23681.3	72.5937	12510	72.5935	9131.46	72.9199	55022.8	72.5947	13108.6
	72.5938	40432.6	72.5932	8975.04	72.5938	12160.2	72.5939	10532.5	72.5939	12067.8	72.5939	13556.3	72.5937	12948.4	72.5935	9727.36	72.9199	45084.5	72.5947	16494.2
	72.5938	39173.8	72.5932	26445.9	72.5938	11316.4	72.5939	12284.6	72.5939	14803.7	72.5939	13104.3	72.5937	15306.5	72.5935	12217.5	72.9199	63417.1	72.5947	16644.9
	72.891	57412.8	72.8904	31387.2	72.891	15005.5	72.8911	8875.28	72.8911	13401.8	72.8911	13698.3	72.8908	12322.4	72.8907	6025.58	72.9199	1246.26	72.8918	7654.65
	72.891	27625.2	72.8904	29354.1	72.891	13296.7	72.8911	13558.5	72.8911	9839.45	72.8911	13115.4	72.8908	14844.1	72.8907	6530.77	72.9199	55745.2	72.8918	8430.48
	72.891	61546.1	72.8904	42713	72.891	15633.1	72.8911	12345.9	72.8911	12200.1	72.8911	12897.1	72.8908	12620.5	72.8907	6616.73	72.9199	1146.72	72.8918	9108.61
	72.891	28759.2	72.8904	22973.8	72.891	9539.1	72.8911	14422.3	72.8911	10117.9	72.8911	12289.5	72.8908	12812.2	72.8907	7072.04	72.9199	50949.7	72.8918	9248.49
	72.891	70338.1	72.8904	38263.4	72.891	17615.7	72.8911	13186	72.8911	12239.4	72.8911	13940.9	72.8908	15443.5	72.8907	7246.87	72.9199	1194.89	72.8918	9253.36
	72.891	42241.1	72.8904	26536.6	72.891	12836.8	72.8911	14600.8	72.8911	15725.1	72.8911	9787.76	72.8908	13418.3	72.8907	7743.2	72.9199	53867.7	72.8918	9566.66
	72.891	55303.1	72.8904	6148.46	72.891	13327.9	72.8911	12934.4	72.8911	12822.3	72.8911	16035	72.8908	12092.8	72.8907	7748.26	72.9199	52320.6	72.8918	9903.69
	72.891	31425.9	72.8904	1000.19	72.891	12757.7	72.8911	11956.7	72.8911	11541.3	72.8911	13210.5	72.8908	14280.1	72.8907	8801.95	72.9199	55339.3	72.8918	9960.71
	72.891	54804.5	72.8904	35308.8	72.891	12912.9	72.8911	12899.5	72.8911	14424.4	72.8911	13115.7	72.8908	13117.7	72.8907	8982.79	72.9199	62431.8	72.8918	10984.2
	72.891	1750.75	72.8904	1599.49	72.891	9151.75	72.8911	2923.29	72.8911	17733.3	72.8911	18102.7	72.8908	2599.92	72.8907	9179.73	73.2268	56274.9	72.8918	12551.1
	72.891	43930.6	72.8904	38277.9	72.891	14014.7	72.8911	12226	72.8911	14076.8	72.8911	23620.7	72.8908	12448.9	72.8907	9432.33	73.2268	45112	72.8918	13043.2
	72.891	40124.4	72.8904	9000.4	72.891	12652.3	72.8911	10637.5	72.8911	12201.6	72.8911	13613.2	72.8908	12997.7	72.8907	10326.1	73.2268	63555.1	72.8918	16100.7
	72.891	38984.3	72.8904	26682.7	72.891	13126.2	72.8911	12384	72.8911	14854.4	72.8911	13312.2	72.8908	15341.2	72.8907	12246.7	73.2268	1280.69	72.8918	16459.8
	73.1882	56694.7	73.1876	31764.9	73.1882	15087.6	73.1883	8888.43	73.1882	13500.5	73.1883	13758.3	73.188	12312.9	73.1878	5966.61	73.2268	55477.9	73.189	7642.6
	73.1882	27525.9	73.1876	29495.7	73.1882	13910.5	73.1883	13744.2	73.1882	10054.9	73.1883	13283.5	73.188	14861.4	73.1878	6598.38	73.2268	1137.88	73.189	8366.84
	73.1882	60864.4	73.1876	43092.4	73.1882	15798.7	73.1883	12463	73.1882	12226.5	73.1883	12950.2	73.188	12715.4	73.1878	6660.95	73.2268	51749.1	73.189	9120.98
	73.1882	28703.5	73.1876	23361.7	73.1882	10443.9	73.1883	14750.7	73.1882	10248.6	73.1883	12807.1	73.188	12833.8	73.1878	7195.8	73.2268	1054.29	73.189	9228.86
	73.1882	69382.6	73.1876	38615.3	73.1882	17728.7	73.1883	13287.5	73.1882	12447.4	73.1883	14040.8	73.188	15565.9	73.1878	7371.77	73.2268	53661.2	73.189	9245.08
	73.1882	41700.8	73.1876	26822	73.1882	13762.4	73.1883	14536.3	73.1882	15800.2	73.1883	10883.9	73.188	13540.7	73.1878	7776.55	73.2268	52130.7	73.189	9564.45
	73.1882	54719.8	73.1876	6379.1	73.1882	13617.9	73.1883	12973.1	73.1882	12895.9	73.1883	16125.5	73.188	12190.1	73.1878	7836	73.2268	55450.7	73.189	9817.58
	73.1882	31370.1	73.1876	934.418	73.1882	13713.9	73.1883	12056.2	73.1882	11611.2	73.1883	13394.6	73.188	14296.6	73.1878	8873.13	73.2268	62713.1	73.189	9905.14
	73.1882	54102.7	73.1876	35558.9	73.1882	13158.5	73.1883	13007.8	73.1882	14550.8	73.1883	13153.1	73.188	13133.3	73.1878	9001.82	73.5337	57525	73.189	11126.6
	73.1882	1648.59	73.1876	1629.34	73.1882	10308.1	73.1883	2849.83	73.1882	18680.9	73.1883	17955.5	73.188	2588.73	73.1878	9135.26	73.5337	45038.7	73.189	12512.4
	73.1882	43503.9	73.1876	38413.6	73.1882	14201.9	73.1883	12269	73.1882	14151.3	73.1883	23499.5	73.188	12390.4	73.1878	9685.32	73.5337	63572.6	73.189	12856.8
	73.1882	39537.5	73.1876	8966.14	73.1882	13167	73.1883	10709.3	73.1882	12367.4	73.1883	13639.9	73.188	13072.8	73.1878	10858.3	73.5337	1314.64	73.189	16034.6
	73.1882	38608.2	73.1876	26904	73.1882	15036.8	73.1883	12473	73.1882	14988.3	73.1883	13477.6	73.188	15379.8	73.1878	12207	73.5337	55039.2	73.189	16363.5
	73.4854	55658.6	73.4849	32050.1	73.4853	15114.4	73.4854	8826.36	73.4854	13575.7	73.4854	13760.2	73.4852	12249.2	73.485	5832.43	73.5337	1151.57	73.4862	7615.5
	73.4854	27279.8	73.4849	29521.5	73.4853	14379.3	73.4854	13912.2	73.4854	10271.1	73.4854	13387.6	73.4852	14801.3	73.485	6609.97	73.5337	52346.6	73.4862	8262.08
	73.4854	59833.3	73.4849	43304.6	73.4853	15937.1	73.4854	12549.8	73.4854	12205.4	73.4854	12951.8	73.4852	12785.7	73.485	6649.09	73.5337	910.948	73.4862	9073.96
	73.4854	28496.2	73.4849	23656	73.4853	11577.8	73.4854	15197.8	73.4854	10431	73.4854	13246.3	73.4852	12804.5	73.485	7301.56	73.5337	53278.4	73.4862	9186.01
	73.4854	68045.4	73.4849	38778.2	73.4853	17738.1	73.4854	13400.3	73.4854	12583.4	73.4854	14097	73.4852	15674.4	73.485	7424.91	73.5337	51794.9	73.4862	9236.71
	73.4854	40827.9	73.4849	27028.6	73.4853	14752	73.4854	14417.5	73.4854	15892.8	73.4854	11781.9	73.4852	13665.6	73.485	7757.57	73.5337	55390.5	73.4862	9484.07
	73.4854	53792.2	73.4849	6583.82	73.4853	13796.2	73.4854	12936.2	73.4854	12887.9	73.4854	16135.3	73.4852	12264.6	73.485	7859.65	73.5337	62870	73.4862	9727.26
	73.4854	31142.2	73.4849	888.809	73.4853	14614	73.4854	12077.6	73.4854	11743.5	73.4854	13509.4	73.4852	14248.9	73.485	8929.04	73.8405	58681.8	73.4862	9813.79
	73.4854	53035.3	73.4849	35685.8	73.4853	13296.2	73.4854	13070.6	73.4854	14646.7	73.4854	13109.2	73.4852	13082.7	73.485	8965.84	73.8405	44927.6	73.4862	11203.4
	73.4854	1553.53	73.4849	1638.34	73.4853	11446.6	73.4854	2793.39	73.4854	20020.2	73.4854	17708.6	73.4852	2572.46	73.485	8984.85	73.8405	63447.4	73.4862	12397.8
	73.4854	42862.7	73.4849	38390.9	73.4853	14335.7	73.4854	12307.8	73.4854	14199.5	73.4854	23289.3	73.4852	12330.3	73.485	9891.15	73.8405	1336.55	73.4862	12553.6
	73.4854	38681.2	73.4849	8899.76	73.4853	13569.9	73.4854	10738.6	73.4854	12562.5	73.4854	13623.1	73.4852	13159.5	73.485	11332.3	73.8405	54509.7	73.4862	16191
	73.4854	38037	73.4849	27069.3	73.4853	16616.3	73.4854	12522.6	73.4854	15174.4	73.4854	13626.2	73.4852	15396.6	73.485	12091.1	73.8405	1182.05	73.4862	16294.9
	73.7826	54398.1	73.7821	32201.3	73.7825	15079	73.7826	8749.61	73.7826	13614	73.7826	13710.5	73.7824	12154.3	73.7821	5677.46	73.8405	52633	73.7834	7580.76
	73.7826	26902.7	73.7821	29449.8	73.7825	14754.3	73.7826	14019.2	73.7826	10449.4	73.7826	13433.8	73.7824	14667.3	73.7821	6543.43	73.8405	805.226	73.7834	8126.91
	73.7826	58533.1	73.7821	43340.8	73.7825	16034.4	73.7826	12568.4	73.7826	12144.9	73.7826	12906.1	73.7824	12815.5	73.7821	6571.8	73.8405	52807.6	73.7834	8985.3
	73.7826	28159	73.7821	23825.8	73.7825	12582.7	73.7826	15745.3	73.7826	10626.2	73.7826	13605.4	73.7824	12740.3	73.7821	7374.69	73.8405	51378.2	73.7834	9130.28
	73.7826	66471.4	73.7821	38770	73.7825	17656.5	73.7826	13536.8	73.7826	12620	73.7826	14104.5	73.7824	15761.2	73.7821	7380.95	73.8405	55192.5	73.7834	9217.9
	73.7826	39704.6	73.7821	27142	73.7825	15661.1	73.7826	14279.4	73.7826	15939.4	73.7826	12543.7	73.7824	13789.1	73.7821	7670.3	73.8405	62945.4	73.7834	9329.98
	73.7826	52599.5	73.7821	6764.16	73.7825	13877.8	73.7826	12832.6	73.7826	12819.5	73.7826	16078.5	73.7824	12325.2	73.7821	7830.68	74.1474	59670	73.7834	9694.92
	73.7826	30741.7	73.7821	871.969	73.7825	15318.2	73.7826	12042.6	73.7826	11879.3	73.7826	13528.8	73.7824	14152.8	73.7821	8714.12	74.1474	44819.3	73.7834	9696.4
	73.7826	51663.9	73.7821	35700.1	73.7825	13374.1	73.7826	13078.9	73.7826	14684.8	73.7826	12998.3	73.7824	12978	73.7821	8958.27	74.1474	63151.2	73.7834	11195.7
	73.7826	1480.77	73.7821	1630.21	73.7825	12459.5	73.7826	2744.38	73.7826	21635.7	73.7826	17383.2	73.7824	2545.83	73.7821	8965.75	74.1474	1340.17	73.7834	12174.8
	73.7826	42046.6	73.7821	38224.9	73.7825	14447.6	73.7826	12338.9	73.7826	14205.7	73.7826	22982.4	73.7824	12262.4	73.7821	10061.2	74.1474	53957.1	73.7834	12231.5
	73.7826	37650.1	73.7821	8834.72	73.7825	13920.9	73.7826	10732.6	73.7826	12774.2	73.7826	13569.3	73.7824	13239	73.7821	11774.2	74.1474	1214.37	73.7834	15949.2
	73.7826	37314.6	73.7821	27203.9	73.7825	17997.5	73.7826	12519.2	73.7826	15370.5	73.7826	13786.5	73.7824	15373.4	73.7821	11913	74.1474	52593.4	73.7834	16601.7
	74.0798	53043.3	74.0794	32202.7	74.0797	14989.4	74.0797	8723.06	74.0798	13605.2	74.0797	13632.6	74.0795	12060.4	74.0793	5564.89	74.1474	755.899	74.0806	7532.65
	74.0798	26439.6	74.0794	29311.4	74.0797	15108.6	74.0797	14039.3	74.0798	10556.6	74.0797	13446.8	74.0795	14482.9	74.0793	6397.16	74.1474	52324.2	74.0806	7977.74
	74.0798	57096.2	74.0794	43233.7	74.0797	16076.6	74.0797	12497.3	74.0798	12061.2	74.0797	12832.2	74.0795	12793.4	74.0793	6432.18	74.1474	50938.7	74.0806	8889.89
	74.0798	27734.6	74.0794	23900.7	74.0797	13565.8	74.0797	16342.2	74.0798	10790.5	74.0797	13896.6	74.0795	12662.2	74.0793	7241.35	74.1474	54897.9	74.0806	9056.67
	74.0798	64840.2	74.0794	38651.3	74.0797	17516	74.0797	13692	74.0798	12556.5	74.0797	14064.1	74.0795	15821	74.0793	7405.22	74.1474	62970.8	74.0806	9124.26
	74.0798	38451.9	74.0794	27170.1	74.0797	16628.8	74.0797	14154.5	74.0798	15892.2	74.0797	13261.2	74.0795	13900.4	74.0793	7513.73	74.4543	60446	74.0806	9180.45
	74.0798	51267.8	74.0794	6920.97	74.0797	13906.3	74.0797	12693.2	74.0798	12734.3	74.0797	15983.1	74.0795	12377.8	74.0793	7771.89	74.4543	44713.1	74.0806	9552.7
	74.0798	30204.8	74.0794	885.983	74.0797	15949	74.0797	11980.9	74.0798	11955.1	74.0797	13453.5	74.0795	14034.4	74.0793	8445.84	74.4543	62667.1	74.0806	9756.1
	74.0798	50105.6	74.0794	35634.7	74.0797	13457.3	74.0797	13029.1	74.0798	14652.4	74.0797	12848.1	74.0795	12844.6	74.0793	8941.17	74.4543	1325.24	74.0806	11106
	74.0798	1438.77	74.0794	1606.93	74.0797	13466.6	74.0797	2686.19	74.0798	23327.9	74.0797	17008.2	74.0795	2508.95	74.0793	8968.46	74.4543	53421.5	74.0806	11782.3
	74.0798	41114.6	74.0794	37958.9	74.0797	14565.2	74.0797	12348.3	74.0798	14167.9	74.0797	22587.3	74.0795	12177.3	74.0793	10210.4	74.4543	1229.72	74.0806	12051.5
	74.0798	36561.7	74.0794	8792.91	74.0797	14286.8	74.0797	10705.2	74.0798	12978.2	74.0797	13497.1	74.0795	13287.6	74.0793	11697.3	74.4543	52289.9	74.0806	15656.5
	74.0798	36495.9	74.0794	27324.1	74.0797	19353.8	74.0797	12464.6	74.0798	15528.4	74.0797	13967.9	74.0795	15301.5	74.0793	12216.4	74.4543	754.502	74.0806	16637.3
	74.377	51701.1	74.3766	32063.4	74.3768	14864	74.3769	8785.47	74.377	13542.7	74.3769	13553	74.3767	11991.1	74.3765	5540.04	74.4543	51867	74.3777	7450.99
	74.377	25926.7	74.3766	29129.6	74.3768	15508.4	74.3769	13966.5	74.377	10572.3	74.3769	13452	74.3767	14279.7	74.3765	6189.39	74.4543	50510.3	74.3777	7832.09
	74.377	55639.4	74.3766	43029.8	74.3768	16057.9	74.3769	12339.2	74.377	11967.9	74.3769	12753.3	74.3767	12711.2	74.3765	6246.69	74.4543	54548.4	74.3777	8822.41
	74.377	27256	74.3766	23931	74.3768	14632	74.3769	16905.7	74.377	10888.9	74.3769	14144.9	74.3767	12584.7	74.3765	7032.07	74.4543	62944.8	74.3777	8892.78
	74.377	63288	74.3766	38493.4	74.3768	17354.6	74.3769	13837.6	74.377	12415.8	74.3769	13979.7	74.3767	15851.3	74.3765	7305.01	74.7611	60999.9	74.3777	8954.83
	74.377	37166.4	74.3766	27136	74.3768	17765.6	74.3769	14057	74.377	15720.9	74.3769	14034.1	74.3767	13982.3	74.3765	7390.25	74.7611	44580.9	74.3777	9111.58
	74.377	49906.7	74.3766	7060.09	74.3768	13939.8	74.3769	12552.6	74.377	12676.8	74.3769	15874.5	74.3767	12419.5	74.3765	7710.33	74.7611	62015.2	74.3777	9383.82
	74.377	29579.6	74.3766	921.056	74.3768	16646.7	74.3769	11915.4	74.377	11925	74.3769	13311.6	74.3767	13920.1	74.3765	8227.6	74.7611	1294.88	74.3777	9890.96
	74.377	48465	74.3766	35517.4	74.3768	13601	74.3769	12924.2	74.377	14554	74.3769	12693.4	74.3767	12713.3	74.3765	8919.22	74.7611	52924.8	74.3777	10959.7
	74.377	1425.21	74.3766	1568.25	74.3768	14583.3	74.3769	2604.84	74.377	24862.9	74.3769	16617.6	74.3767	2464.84	74.3765	8941.24	74.7611	1213.87	74.3777	11437.2
	74.377	40115.2	74.3766	37632.5	74.3768	14698.4	74.3769	12317.9	74.377	14087.2	74.3769	22125.4	74.3767	12064	74.3765	10355.1	74.7611	51818.3	74.3777	11888.6
	74.377	35504.5	74.3766	8778.45	74.3768	14721.1	74.3769	10663.5	74.377	13144.8	74.3769	13422.8	74.3767	13280.5	74.3765	11471.1	74.7611	776.72	74.3777	15332
	74.377	35619.9	74.3766	27423.1	74.3768	20850.6	74.3769	12368.6	74.377	15600.7	74.3769	14155.4	74.3767	15179.9	74.3765	12686.5	74.7611	51443.6	74.3777	16151.6
	74.6742	50425.4	74.6738	31815.4	74.674	14725.2	74.6741	8934.97	74.6742	13424.2	74.6741	13485.9	74.6739	11948.4	74.6736	5611.63	74.7611	50103.8	74.6749	7313.48
	74.6742	25365.5	74.6738	28914.2	74.674	15995.8	74.6741	13810.6	74.6742	10494.2	74.6741	13460.4	74.6739	14085.7	74.6736	5953.3	74.7611	54184.1	74.6749	7703.52
	74.6742	54227.6	74.6738	42769	74.674	15988.4	74.6741	12119.6	74.6742	11868.3	74.6741	12685.1	74.6739	12565.8	74.6736	6043	74.7611	62837.8	74.6749	8654.97
	74.6742	26732.4	74.6738	23964.9	74.674	15865.4	74.6741	17335.4	74.6742	10900.8	74.6741	14385.6	74.6739	12511.8	74.6736	6793.16	75.068	61347	74.6749	8800.98
	74.6742	61868.5	74.6738	38350.9	74.674	17206.2	74.6741	13932.6	74.6742	12235	74.6741	13859.8	74.6739	15850.9	74.6736	7077.09	75.068	44394.5	74.6749	8818.14
	74.6742	35892.1	74.6738	27065.1	74.674	19132.4	74.6741	13977.9	74.6742	15408.4	74.6741	14954.6	74.6739	14015.1	74.6736	7334.33	75.068	61260.5	74.6749	8997.68
	74.6742	48571.6	74.6738	7198.79	74.674	14029.8	74.6741	12432.5	74.6742	12670.1	74.6741	15762.9	74.6739	12440.6	74.6736	7671.04	75.068	1252.64	74.6749	9182.03
	74.6742	28907.7	74.6738	952.848	74.674	17537.6	74.6741	11856.9	74.6742	11772.9	74.6741	13150	74.6739	13825.8	74.6736	8108.55	75.068	52480.9	74.6749	10050.4
	74.6742	46801.2	74.6738	35357.6	74.674	13831.1	74.6741	12777.9	74.6742	14407.3	74.6741	12571.5	74.6739	12608.7	74.6736	8811.86	75.068	1163.78	74.6749	10796.8
	74.6742	1426.57	74.6738	1518.14	74.674	15893.1	74.6741	2496.92	74.6742	26023.9	74.6741	16250.3	74.6739	2416.31	74.6736	8956.12	75.068	51268.3	74.6749	11176.9
	74.6742	39080.7	74.6738	37266.5	74.674	14839.5	74.6741	12237.1	74.6742	13956.8	74.6741	21627.9	74.6739	11913.1	74.6736	10514.9	75.068	799.416	74.6749	11750.1
	74.6742	34513.2	74.6738	8784.25	74.674	15251.1	74.6741	10602.6	74.6742	13247.8	74.6741	13346.1	74.6739	13199.1	74.6736	11256.1	75.068	51050.7	74.6749	14989.9
	74.6742	34705.3	74.6738	27475.9	74.674	22617.6	74.6741	12240.9	74.6742	15548.1	74.6741	14321.7	74.6739	15011.2	74.6736	13199.9	75.068	49716.9	74.6749	15040.2
	74.9715	49218.3	74.9711	31509.4	74.9712	14589.6	74.9712	9133.65	74.9714	13254.1	74.9712	13425.2	74.9711	11910.3	74.9708	5726.62	75.068	53837.5	74.9721	7113.12
	74.9715	24718.9	74.9711	28670.2	74.9712	16585.2	74.9712	13590.6	74.9714	10339.8	74.9712	13462.8	74.9711	13915.3	74.9708	5750.04	75.068	62619.8	74.9721	7596.15
	74.9715	52870	74.9711	42473.6	74.9712	15890.4	74.9712	11875.2	74.9714	11755.5	74.9712	12627.6	74.9711	12361.3	74.9708	5853.05	75.3749	61510.3	74.9721	8420.04
	74.9715	26159.9	74.9711	24029.7	74.9712	17318.4	74.9712	17536.1	74.9714	10816.2	74.9712	14657.4	74.9711	12437.7	74.9708	6564.37	75.3749	44145.5	74.9721	8649.57
	74.9715	60561.4	74.9711	38250	74.9712	17093.7	74.9712	13942.9	74.9714	12054.5	74.9712	13718.5	74.9711	15814.9	74.9708	6868.99	75.3749	60491.1	74.9721	8819.05
	74.9715	34633.1	74.9711	26971.7	74.9712	20737.7	74.9712	13893.8	74.9714	14950.2	74.9712	16097.1	74.9711	13983.1	74.9708	7247.85	75.3749	1201.31	74.9721	8831.59
	74.9715	47270.2	74.9711	7365.65	74.9712	14201.9	74.9712	12336.4	74.9714	12707.4	74.9712	15643.9	74.9711	12432.2	74.9708	7671.12	75.3749	52098	74.9721	8945.6
	74.9715	28215.2	74.9711	947.416	74.9712	18706.6	74.9712	11808.9	74.9714	11511.6	74.9712	13014.8	74.9711	13749.1	74.9708	8107.08	75.3749	1088.78	74.9721	10174.6
	74.9715	45127.1	74.9711	35149.1	74.9712	14138.6	74.9712	12615.5	74.9714	14236.2	74.9712	12512.2	74.9711	12540.4	74.9708	8661.07	75.3749	50699	74.9721	10655.2
	74.9715	1422.37	74.9711	1469.79	74.9712	17433.3	74.9712	2371.24	74.9714	26651.1	74.9712	15946	74.9711	2363.56	74.9708	8975.61	75.3749	810.415	74.9721	11004.2
	74.9715	38034.8	74.9711	36868.9	74.9712	14972	74.9712	12111.1	74.9714	13762	74.9712	21131.3	74.9711	11719.6	74.9708	10709.4	75.3749	50684.4	74.9721	11619.2
	74.9715	33576.7	74.9711	8804.25	74.9712	15875.7	74.9712	10512.4	74.9714	13270.4	74.9712	13248.3	74.9711	13036.4	74.9708	11066.3	75.3749	49342.8	74.9721	13369.9
	74.9715	33764.4	74.9711	27460.5	74.9712	24743	74.9712	12088.3	74.9714	15348.3	74.9712	14443.3	74.9711	14798.9	74.9708	13752.1	75.3749	53520.7	74.9721	14640
	75.2687	48055.6	75.2683	31206.2	75.2684	14459.9	75.2684	9327.07	75.2686	13044.1	75.2684	13347.4	75.2682	11842.8	75.2679	5538.72	75.3749	62280.7	75.2693	6869.53
	75.2687	23932.9	75.2683	28409.4	75.2684	17268.5	75.2684	13327.5	75.2686	10139.1	75.2684	13436.9	75.2682	13766.2	75.2679	5703.24	75.6818	61507.4	75.2693	7500.8
	75.2687	51545.9	75.2683	42154.4	75.2684	15784.4	75.2684	11639.6	75.2686	11619.9	75.2684	12564.2	75.2682	12110.7	75.2679	5901.92	75.6818	43845.3	75.2693	8189.08
	75.2687	25538.7	75.2683	24120.4	75.2684	19001.5	75.2684	17440.9	75.2686	10628.4	75.2684	14991.2	75.2682	12351.3	75.2679	6370.15	75.6818	59786.8	75.2693	8460.97
	75.2687	59306	75.2683	38191.4	75.2684	17022.8	75.2684	13857	75.2686	11907.1	75.2684	13571.2	75.2682	15730.8	75.2679	6710.03	75.6818	1142.87	75.2693	8618.6
	75.2687	33385.7	75.2683	26853.3	75.2684	22543.8	75.2684	13781.6	75.2686	14357.5	75.2684	17507.8	75.2682	13881.2	75.2679	7143.58	75.6818	51774.2	75.2693	8683.15
	75.2687	45992.7	75.2683	7591.36	75.2684	14444.4	75.2684	12252.9	75.2686	12757.7	75.2684	15507.8	75.2682	12391.1	75.2679	7714.55	75.6818	1006.43	75.2693	8849.06
	75.2687	27514.2	75.2683	875.81	75.2684	20177.3	75.2684	11773.9	75.2686	11168	75.2684	12933	75.2682	13670.1	75.2679	8203.22	75.6818	50135.7	75.2693	10217.3
	75.2687	43434.4	75.2683	34887.3	75.2684	14486.7	75.2684	12466.5	75.2686	14058.9	75.2684	12525	75.2682	12497.2	75.2679	8495.99	75.6818	807.336	75.2693	10555.3
	75.2687	1393.92	75.2683	1440.6	75.2684	19194.1	75.2684	2244.31	75.2686	26658.1	75.2684	15730.5	75.2682	2302.73	75.2679	8980.94	75.6818	50341.4	75.2693	10890
	75.2687	37001.8	75.2683	36452.6	75.2684	15081.1	75.2684	11958.7	75.2686	13490.6	75.2684	20666.1	75.2682	11486.5	75.2679	10904.4	75.6818	48975.7	75.2693	11344.7
	75.2687	32659.9	75.2683	8842.46	75.2684	16568.5	75.2684	10390.5	75.2686	13205.5	75.2684	13105.1	75.2682	12799	75.2679	10947.8	75.6818	53216.4	75.2693	11467.7
	75.2687	32814.9	75.2683	27377.1	75.2684	27275.8	75.2684	11917.1	75.2686	14999.9	75.2684	14511.3	75.2682	14548.6	75.2679	14314.2	75.6818	61838.4	75.2693	14292
	75.5659	46911.4	75.5655	30965.4	75.5655	14323.3	75.5656	9465.27	75.5658	12809.6	75.5656	13224.6	75.5654	11718.9	75.5651	5397.48	75.9886	61347.8	75.5664	6626.55
	75.5659	22969.8	75.5655	28157.1	75.5655	18018.6	75.5656	13040.8	75.5658	9921.63	75.5656	13358	75.5654	13623.2	75.5651	5605.3	75.9886	43510.8	75.5664	7400.16
	75.5659	50233.9	75.5655	41821.9	75.5655	15675.7	75.5656	11433	75.5658	11458.7	75.5656	12470	75.5654	11835.3	75.5651	6013.08	75.9886	59191.9	75.5664	7960.75
	75.5659	24888	75.5655	24201.5	75.5655	20871	75.5656	17025.9	75.5658	10330.9	75.5656	15400.8	75.5654	12239.9	75.5651	6211.08	75.9886	1078.46	75.5664	8268.91
	75.5659	58043.8	75.5655	38159.4	75.5655	16979.4	75.5656	13688	75.5658	11809.4	75.5656	13430.3	75.5654	15582.4	75.5651	6607.1	75.9886	51495.5	75.5664	8375.8
	75.5659	32160.4	75.5655	26699.2	75.5655	24475	75.5656	13632.8	75.5658	13662.1	75.5656	19196.2	75.5654	13717.5	75.5651	7032.13	75.9886	935.579	75.5664	8412.51
	75.5659	44740.1	75.5655	7896.11	75.5655	14713.4	75.5656	12163.3	75.5658	12780.5	75.5656	15352.1	75.5654	12320	75.5651	7789.6	75.9886	49581	75.5664	8853.92
	75.5659	26815.3	75.5655	732.283	75.5655	21903.7	75.5656	11754.6	75.5658	10766.5	75.5656	12903.7	75.5654	13563.2	75.5651	8342.06	75.9886	791.491	75.5664	9233.5
	75.5659	41716.8	75.5655	34584.2	75.5655	14824.9	75.5656	12352.4	75.5658	13882	75.5656	12590.2	75.5654	12451.4	75.5651	8344.08	75.9886	50013.9	75.5664	10155.8
	75.5659	1333.39	75.5655	1437.74	75.5655	21125.1	75.5656	2132.75	75.5658	26029.5	75.5656	15600.2	75.5654	2226.14	75.5651	8948.95	75.9886	48613.4	75.5664	10491.9
	75.5659	36004.5	75.5655	36047.5	75.5655	15156.6	75.5656	11800.8	75.5658	13146.1	75.5656	20245.5	75.5654	11226.8	75.5651	10763.8	75.9886	52889	75.5664	10789.6
	75.5659	31728.8	75.5655	8914.88	75.5655	17286.3	75.5656	10248	75.5658	13054	75.5656	12905.4	75.5654	12504.9	75.5651	11216.2	75.9886	61327.1	75.5664	11274
	75.5659	31881.4	75.5655	27252.9	75.5655	30230.1	75.5656	11735	75.5658	14521.7	75.5656	14530.3	75.5654	14270.3	75.5651	14833.7	76.2955	61045.5	75.5664	13958.8
	75.8631	45781	75.8628	30837.2	75.8627	14156.7	75.8627	9518.59	75.8629	12565.6	75.8627	13040.2	75.8626	11535.7	75.8622	5286.79	76.2955	43152.9	75.8636	6436.96
	75.8631	21839.1	75.8628	27948.1	75.8627	18792	75.8627	12749.4	75.8629	9701.44	75.8627	13211.9	75.8626	13467.6	75.8622	5552.01	76.2955	58710.4	75.8636	7282.59
	75.8631	48938.2	75.8628	41498.6	75.8627	15550.7	75.8627	11260.8	75.8629	11281.3	75.8627	12324.5	75.8626	11563.5	75.8622	6049.37	76.2955	1008.31	75.8636	7287.56
	75.8631	24243.5	75.8628	24224.3	75.8627	22820.7	75.8627	16315.4	75.8629	9921.66	75.8627	15880.3	75.8626	12096	75.8622	6065.06	76.2955	51236.6	75.8636	7737.28
	75.8631	56747.1	75.8628	38136.2	75.8627	16932.3	75.8627	13462.8	75.8629	11758.7	75.8627	13301.5	75.8626	15360.4	75.8622	6543.41	76.2955	889.548	75.8636	8090.56
	75.8631	30982.6	75.8628	26509.5	75.8627	26427.3	75.8627	13458.8	75.8629	12914.5	75.8627	21131.9	75.8626	13512.6	75.8622	6918.7	76.2955	49031.3	75.8636	8126.11
	75.8631	43531.4	75.8628	8283.19	75.8627	14947.7	75.8627	12051.1	75.8629	12739.7	75.8627	15183.9	75.8626	12224.4	75.8622	7872.64	76.2955	764.417	75.8636	8155.82
	75.8631	26137.1	75.8628	543.884	75.8627	23770.4	75.8627	11747.7	75.8629	10321	75.8627	12902.5	75.8626	13413.8	75.8622	8218.79	76.2955	49694.1	75.8636	8800.86
	75.8631	39991.1	75.8628	34274.8	75.8627	15101.4	75.8627	12278.6	75.8629	13699.9	75.8627	12661.7	75.8626	12371.9	75.8622	8451.71	76.2955	48262	75.8636	9988.55
	75.8631	1247.87	75.8628	1445.8	75.8627	23144	75.8627	2047.07	75.8629	24809.9	75.8627	15521.8	75.8626	2126.33	75.8622	8861.15	76.2955	52507.2	75.8636	10439.1
	75.8631	35058.5	75.8628	35699.1	75.8627	15191.6	75.8627	11648.3	75.8629	12753.2	75.8627	19859.1	75.8626	10962.5	75.8622	10631.6	76.2955	60781.8	75.8636	10665
	75.8631	30768.4	75.8628	9045.92	75.8627	17973.8	75.8627	10103.6	75.8629	12824.1	75.8627	12660.4	75.8626	12178.7	75.8622	11471.5	76.6024	60637.3	75.8636	11034.8
	75.8631	30990.4	75.8628	27129.5	75.8627	33583.4	75.8627	11551.6	75.8629	13944.7	75.8627	14512.2	75.8626	13980.3	75.8622	15240.7	76.6024	42778.3	75.8636	13653.7
	76.1603	44688.7	76.16	30857.8	76.1599	13937.9	76.1599	9484.51	76.1601	12321.4	76.1599	12797.5	76.1598	11314.6	76.1594	5179.38	76.6024	58318	76.1608	5679.39
	76.1603	20609.4	76.16	27835.9	76.1599	19527.4	76.1599	12474.6	76.1601	9473.62	76.1599	12999	76.1598	13286.3	76.1594	5521.75	76.6024	933.388	76.1608	6342.26
	76.1603	47694.8	76.16	41229.4	76.1599	15385.7	76.1599	11122.4	76.1601	11105.1	76.1599	12122.1	76.1598	11324.8	76.1594	5903.18	76.6024	50972.6	76.1608	7157.24
	76.1603	23641.5	76.16	24152	76.1599	24688.9	76.1599	15377.5	76.1601	9411.41	76.1599	16407.3	76.1598	11922.8	76.1594	6006.79	76.6024	871.998	76.1608	7528.67
	76.1603	55431.7	76.16	38116.5	76.1599	16843.8	76.1599	13210.6	76.1601	11735	76.1599	13183.6	76.1598	15073.9	76.1594	6491.81	76.6024	48497.4	76.1608	7889.66
	76.1603	29874.2	76.16	26310	76.1599	28278.2	76.1599	13286.4	76.1601	12173.9	76.1599	23249.3	76.1598	13293.2	76.1594	6804.5	76.6024	729.331	76.1608	7932.42
	76.1603	42393.9	76.16	8744.6	76.1599	15089.3	76.1599	11913.2	76.1601	12611.7	76.1599	15013	76.1598	12109.5	76.1594	7937.26	76.6024	49384.2	76.1608	7939.82
	76.1603	25509.8	76.16	362.029	76.1599	25603.6	76.1599	11738.9	76.1601	9839.21	76.1599	12895.6	76.1598	13229.7	76.1594	8117.87	76.6024	47937.9	76.1608	8673.75
	76.1603	38302.8	76.16	34039.4	76.1599	15271.8	76.1599	12234.7	76.1601	13501.6	76.1599	12685.4	76.1598	12240.6	76.1594	8473.8	76.6024	52068.6	76.1608	9728.41
	76.1603	1155.85	76.16	1428.91	76.1599	25146.8	76.1599	1989.3	76.1601	23094.6	76.1599	15448.4	76.1598	2003.35	76.1594	8716.52	76.6024	60232.7	76.1608	10361.5
	76.1603	34171.7	76.16	35471.4	76.1599	15176.8	76.1599	11499.1	76.1601	12349.5	76.1599	19480.6	76.1598	10720.4	76.1594	10495	76.9092	60191.9	76.1608	10501.5
	76.1603	29791.7	76.16	9263.61	76.1599	18567.5	76.1599	9969	76.1601	12531.3	76.1599	12397.4	76.1598	11846.3	76.1594	11653.6	76.9092	42402.2	76.1608	10765.9
	76.1603	30166.3	76.16	27042.9	76.1599	37270.2	76.1599	11376.3	76.1601	13305.7	76.1599	14469	76.1598	13700.2	76.1594	15460.9	76.9092	57987.3	76.1608	13382.7
	76.4575	43686	76.4572	31054.6	76.457	13655.7	76.4571	9386.61	76.4573	12079.2	76.457	12516.5	76.4569	11086.4	76.4566	5060.68	76.9092	858.498	76.458	4479.36
	76.4575	19395	76.4572	27823.5	76.457	20148.6	76.4571	12242.4	76.4573	9222.82	76.457	12732.4	76.4569	13076.9	76.4566	5491.93	76.9092	50694.9	76.458	6359.1
	76.4575	46571	76.4572	41119.7	76.457	15159.8	76.4571	11019.6	76.4573	10945.6	76.457	11877.7	76.4569	11140.8	76.4566	5713.2	76.9092	876.393	76.458	7058.92
	76.4575	23103.2	76.4572	23980.2	76.457	26282.7	76.4571	14313.7	76.4573	8830.14	76.457	16948.8	76.4569	11735.5	76.4566	5910.92	76.9092	48018.5	76.458	7356.06
	76.4575	54155.8	76.4572	38122.2	76.457	16685.2	76.4571	12956.2	76.4573	11708.8	76.457	13071	76.4569	14750.9	76.4566	6436.3	76.9092	694.076	76.458	7680.44
	76.4575	28835.1	76.4572	26151.8	76.457	29896	76.4571	13147.3	76.4573	11489.8	76.457	25460.4	76.4569	13082.8	76.4566	6693.75	76.9092	49109	76.458	7758.81
	76.4575	41354.1	76.4572	9275.69	76.457	15097.1	76.4571	11767.1	76.4573	12388.8	76.457	14837.8	76.4569	11979.8	76.4566	7970.13	76.9092	47672.2	76.458	7824.73
	76.4575	24969.9	76.4572	245.021	76.457	27191.5	76.4571	11705.1	76.4573	9335.1	76.457	12853.5	76.4569	13039.3	76.4566	8035.49	76.9092	51610.9	76.458	8481.83
	76.4575	36726.9	76.4572	33926.8	76.457	15305.7	76.4571	12203.2	76.4573	13278.9	76.457	12622.6	76.4569	12061.7	76.4566	8394.27	76.9092	59711.1	76.458	9405.55
	76.4575	1078.64	76.4572	1350.11	76.457	27015.1	76.4571	1954.99	76.4573	21021.9	76.457	15344.9	76.4569	1870.12	76.4566	8540.45	77.2161	59799.4	76.458	10229.5
	76.4575	33354.6	76.4572	35403.5	76.457	15098.5	76.4571	11347.8	76.4573	11969.4	76.457	19082.2	76.4569	10526.6	76.4566	10349.8	77.2161	42060.2	76.458	10315.9
	76.4575	28840.8	76.4572	9595.75	76.457	18997.8	76.4571	9840.66	76.4573	12198.4	76.457	12141.9	76.4569	11530.2	76.4566	11710	77.2161	57713.1	76.458	10496
	76.4575	29435.4	76.4572	27013.1	76.457	41170.8	76.4571	11218.3	76.4573	12644.2	76.457	14406.6	76.4569	13454	76.4566	15435.3	77.2161	794.432	76.458	13143.9
	76.7547	42855.2	76.7545	31450.8	76.7542	13314.7	76.7542	9267.57	76.7545	11836	76.7542	12222.8	76.7541	10872.3	76.7537	4950.14	77.2161	50460.2	76.7552	3667.78
	76.7547	18325.6	76.7545	27924.3	76.7542	20571.3	76.7542	12080.7	76.7545	8938.58	76.7542	12431.1	76.7541	12848.3	76.7537	5460.13	77.2161	888.874	76.7552	6481.25
	76.7547	45663	76.7545	41170.3	76.7542	14865.5	76.7542	10960.1	76.7545	10807.7	76.7542	11620.7	76.7541	11015.6	76.7537	5520.8	77.2161	47664	76.7552	7038.82
	76.7547	22629.7	76.7545	23744.2	76.7542	27413.8	76.7542	13241.5	76.7545	8227.19	76.7542	17463.8	76.7541	11557	76.7537	5809.15	77.2161	670.911	76.7552	7255.35
	76.7547	53021.4	76.7545	38212.7	76.7542	16449.9	76.7542	12721.5	76.7545	11649.7	76.7542	12955.6	76.7541	14429.9	76.7537	6388.93	77.2161	48924.1	76.7552	7510.5
	76.7547	27844.2	76.7545	26094.5	76.7542	31146.4	76.7542	13068.8	76.7545	10884.5	76.7542	27667.9	76.7541	12895.8	76.7537	6606.01	77.2161	47512.6	76.7552	7657.49
	76.7547	40449.1	76.7545	9889.11	76.7542	14950.8	76.7542	11647	76.7545	12081.9	76.7542	14640.2	76.7541	11841.4	76.7537	7978.15	77.2161	51203.2	76.7552	7752.34
	76.7547	24546	76.7545	225.235	76.7542	28316.2	76.7542	11627.4	76.7545	8837.43	76.7542	12759.4	76.7541	12885.5	76.7537	7986.15	77.2161	59266	76.7552	8262.48
	76.7547	35364.3	76.7545	33953.1	76.7542	15189.2	76.7542	12168.8	76.7545	13030	76.7542	12466.1	76.7541	11859.1	76.7537	8261.88	77.523	59560.4	76.7552	9078.4
	76.7547	1031.89	76.7545	1196.94	76.7542	28618	76.7542	1937.56	76.7545	18761.4	76.7542	15204.5	76.7541	1750.24	76.7537	8388.02	77.523	41862.4	76.7552	10040
	76.7547	32639.7	76.7545	35490.8	76.7542	14942.9	76.7542	11199.2	76.7545	11631.6	76.7542	18651.5	76.7541	10400.4	76.7537	10213.3	77.523	57583.1	76.7552	10153.6
	76.7547	27983.3	76.7545	10066.7	76.7542	19195.9	76.7542	9706.79	76.7545	11848.5	76.7542	11904	76.7541	11247	76.7537	11625.5	77.523	755.2	76.7552	10263.4
	76.7547	28830.8	76.7545	27050.5	76.7542	45100.3	76.7542	11088.6	76.7545	11999.8	76.7542	14322.6	76.7541	13264.1	76.7537	15145.4	77.523	50333.1	76.7552	12938.4
	77.0519	42336.7	77.0517	32071.6	77.0514	12932.4	77.0514	9177.17	77.0517	11588.7	77.0514	11937.3	77.0513	10677.3	77.0509	4908.08	77.523	893.256	77.0523	3167.26
	77.0519	17521	77.0517	28208.3	77.0514	20716.5	77.0514	12026.9	77.0517	8625.94	77.0514	12115.8	77.0513	12620.7	77.0509	5401.94	77.523	47542.7	77.0523	6698.92
	77.0519	45125.1	77.0517	41538.3	77.0514	14509.9	77.0514	10953	77.0517	10682.7	77.0514	11381.3	77.0513	10934.3	77.0509	5463.75	77.523	670.962	77.0523	7149.92
	77.0519	22215	77.0517	23512.9	77.0514	27930.9	77.0514	12276.3	77.0517	7662.17	77.0514	17904.1	77.0513	11411.3	77.0509	5766.38	77.523	48920.6	77.0523	7284.04
	77.0519	52198	77.0517	38484.1	77.0514	16155.3	77.0514	12530.5	77.0517	11534.1	77.0514	12827.2	77.0513	14148.7	77.0509	6395.21	77.523	47530.8	77.0523	7399.92
	77.0519	26884	77.0517	26188.1	77.0514	31898.6	77.0514	13070.6	77.0517	10342.7	77.0514	29774.8	77.0513	12739.2	77.0509	6590.02	77.523	50963	77.0523	7675.22
	77.0519	39770.5	77.0517	10617.2	77.0514	14648.4	77.0514	11591.4	77.0517	11720.7	77.0514	14392.3	77.0513	11705.7	77.0509	7983.21	77.523	58975.2	77.0523	7746.12
	77.0519	24246.5	77.0517	255.945	77.0514	28793.5	77.0514	11508.9	77.0517	8384.28	77.0514	12609.4	77.0513	12820	77.0509	8041.74	77.8298	59590	77.0523	8076.82
	77.0519	34356.9	77.0517	34192.5	77.0514	14924.7	77.0514	12124.9	77.0517	12757.3	77.0514	12238.4	77.0513	11667.2	77.0509	8188.95	77.8298	41791.6	77.0523	8848.12
	77.0519	1020.41	77.0517	995.176	77.0514	29810.4	77.0514	1931.85	77.0517	16490.8	77.0514	15044.3	77.0513	1666.98	77.0509	8346.71	77.8298	57608.9	77.0523	9837.43
	77.0519	32107.3	77.0517	35844.9	77.0514	14702.9	77.0514	11076.7	77.0517	11335.8	77.0514	18195.6	77.0513	10351.8	77.0509	10139.9	77.8298	750.377	77.0523	10086.3
	77.0519	27312.7	77.0517	10693.3	77.0514	19108.4	77.0514	9566.88	77.0517	11496	77.0514	11675.7	77.0513	11011	77.0509	11444.5	77.8298	50393	77.0523	10121.3
	77.0519	28407.5	77.0517	27174.6	77.0514	48806.8	77.0514	11005.1	77.0517	11405.8	77.0514	14207.3	77.0513	13151.6	77.0509	14636.9	77.8298	876.856	77.0523	12793.8
	77.3491	42412.3	77.3489	32949.7	77.3485	12532.6	77.3485	9159.31	77.3489	11339.3	77.3485	11671.7	77.3485	10500.2	77.348	5030.58	77.8298	47722.1	77.3495	2878.18
	77.3491	17095.3	77.3489	28693.7	77.3485	20525.9	77.3485	12053.1	77.3489	8305.82	77.3485	11807.2	77.3485	12426.1	77.348	5488.87	77.8298	695.176	77.3495	7027.96
	77.3491	45257.2	77.3489	42352.3	77.3485	14110.3	77.3485	11003.7	77.3489	10553.6	77.3485	11175.5	77.3485	10879.9	77.348	5595.88	77.8298	49245.1	77.3495	7387.64
	77.3491	21871.8	77.3489	23376.4	77.3485	27741.8	77.3485	11521.5	77.3489	7189.17	77.3485	18215.6	77.3485	11321.6	77.348	5871.39	77.8298	47846.6	77.3495	7443.47
	77.3491	52001.2	77.3489	39059.1	77.3485	15833	77.3485	12412.4	77.3489	11350	77.3485	12673.6	77.3485	13940.3	77.348	6534.07	77.8298	50961.1	77.3495	7534.34
	77.3491	25974.2	77.3489	26465.5	77.3485	32039.7	77.3485	13170.7	77.3489	9815.9	77.3485	31684.8	77.3485	12622.5	77.348	6738.79	77.8298	58959.9	77.3495	7877.71
	77.3491	39540.9	77.3489	11498.4	77.3485	14204.8	77.3485	11628.2	77.3489	11346.8	77.3485	14073.7	77.3485	11602.7	77.348	8137.36	78.1367	60066	77.3495	7905.94
	77.3491	24058.9	77.3489	361.881	77.3485	28512.8	77.3485	11385.9	77.3489	8007.72	77.3485	12409.8	77.3485	12910.7	77.348	8248.7	78.1367	41894.8	77.3495	8000.03
	77.3491	33936.6	77.3489	34823.7	77.3485	14528.5	77.3485	12084.4	77.3489	12463.3	77.3485	11976.9	77.3485	11523.5	77.348	8344.09	78.1367	58052.3	77.3495	8868.16
	77.3491	1037.23	77.3489	799.184	77.3485	30432.8	77.3485	1934.8	77.3489	14363.7	77.3485	14887.1	77.3485	1630.64	77.348	8549.19	78.1367	777.659	77.3495	9735.41
	77.3491	31923.9	77.3489	36520.8	77.3485	14382.4	77.3485	11018.5	77.3489	11071.3	77.3485	17731.6	77.3485	10384.7	77.348	10243.2	78.1367	50945.8	77.3495	10150.9
	77.3491	26972.9	77.3489	11481.1	77.3485	18713.7	77.3485	9449.63	77.3489	11141.9	77.3485	11441.1	77.3485	10845	77.348	11281.5	78.1367	835.277	77.3495	10219.8
	77.3491	28274.4	77.3489	27431.3	77.3485	51987.2	77.3485	10996.4	77.3489	10881.9	77.3485	14049	77.3485	13142.3	77.348	14038.1	78.1367	48414.9	77.3495	12790.5
	77.6463	43655	77.6462	34132.6	77.6457	12138.2	77.6457	9244.27	77.6461	11098.7	77.6457	11430.8	77.6456	10377.7	77.6452	5451.9	78.1367	727.457	77.6467	2706.17
	77.6463	17215.3	77.6462	29448.7	77.6457	19976.9	77.6457	12189.3	77.6461	8007.71	77.6457	11525.2	77.6456	12321.8	77.6452	5983.39	78.1367	50155.1	77.6467	7539.64
	77.6463	46664.5	77.6462	43701.1	77.6457	13686.8	77.6457	11115.7	77.6461	10402.9	77.6457	10998	77.6456	10855.7	77.6452	6019.37	78.1367	48683.3	77.6467	7540.23
	77.6463	21669.8	77.6462	23435.5	77.6457	26824.3	77.6457	11067.8	77.6461	6840.28	77.6457	18343.3	77.6456	11315.8	77.6452	6258.28	78.1367	51383.6	77.6467	7988.26
	77.6463	53036	77.6462	40069	77.6457	15511.6	77.6457	12403.1	77.6461	11100.5	77.6457	12481.5	77.6456	13855.4	77.6452	6929.21	78.1367	59418.7	77.6467	8115.36
	77.6463	25204.6	77.6462	26953.4	77.6457	31497.8	77.6457	13401.8	77.6461	9240.92	77.6457	33295.7	77.6456	12572	77.6452	7207.58	78.4436	61335.7	77.6467	8154.46
	77.6463	40231.6	77.6462	12548.5	77.6457	13650.8	77.6457	11775.2	77.6461	11002.4	77.6457	13687.4	77.6456	11564.3	77.6452	8600.28	78.4436	42360.3	77.6467	8303.09
	77.6463	23970.6	77.6462	481.655	77.6457	27464.4	77.6457	11332.1	77.6461	7718.39	77.6457	12174.2	77.6456	13259.7	77.6452	8795.96	78.4436	59404.4	77.6467	8516.65
	77.6463	34538.8	77.6462	35880.2	77.6457	14028.4	77.6457	12075.7	77.6461	12151.2	77.6457	11716	77.6456	11471.9	77.6452	8956.24	78.4436	822.253	77.6467	9349.86
	77.6463	1066.33	77.6462	662.964	77.6457	30326.2	77.6457	1943.76	77.6461	12480.8	77.6457	14740.6	77.6456	1632.98	77.6452	9201.57	78.4436	52552.9	77.6467	9933.07
	77.6463	32413	77.6462	37592.7	77.6457	13995.6	77.6457	11069	77.6461	10827.6	77.6457	17273.2	77.6456	10509.5	77.6452	10722.3	78.4436	774.208	77.6467	10482
	77.6463	27220.6	77.6462	12422.4	77.6457	18034.1	77.6457	9418.74	77.6461	10780.4	77.6457	11188.9	77.6456	10797.5	77.6452	11325.9	78.4436	49913.4	77.6467	10719.9
	77.6463	28668.5	77.6462	27897.7	77.6457	54322.5	77.6457	11103	77.6461	10430.9	77.6457	13841.9	77.6456	13279.7	77.6452	13571.7	78.4436	737.328	77.6467	13087.2
	77.9435	47124.8	77.9434	35688.9	77.9429	11767.7	77.9429	9452.54	77.9433	10883.9	77.9428	11217	77.9428	10330.7	77.9423	6369.63	78.4436	52122.8	77.9439	2578.26
	77.9435	18218.2	77.9434	30575.6	77.9429	19092.7	77.9429	12444.9	77.9433	7760	77.9428	11286	77.9428	12346.1	77.9423	6987.29	78.4436	50468.4	77.9439	7962.22
	77.9435	50472.4	77.9434	45687.2	77.9429	13255.9	77.9429	11305.5	77.9433	10221.6	77.9428	10826.8	77.9428	10881.5	77.9423	7135.52	78.4436	52631.9	77.9439	8386.45
	77.9435	21789.1	77.9434	23800.9	77.9429	25231.7	77.9429	11004.4	77.9433	6658.35	77.9428	18240	77.9428	11441.9	77.9423	7187.24	78.4436	60712.1	77.9439	8522.3
	77.9435	56399.6	77.9434	41636.8	77.9429	15204	77.9429	12549.6	77.9433	10804.5	77.9428	12240.8	77.9428	13902.9	77.9423	7781.63	78.7505	64077.8	77.9439	8911.79
	77.9435	24774.6	77.9434	27690.2	77.9429	30268.9	77.9429	13838.8	77.9433	8565.46	77.9428	34493.3	77.9428	12646.9	77.9423	8234.46	78.7505	43501.2	77.9439	9292.63
	77.9435	42721.9	77.9434	13726.5	77.9429	13035.1	77.9429	12059.3	77.9433	10728.3	77.9428	13264	77.9428	11619.9	77.9423	9633.43	78.7505	62394.3	77.9439	9380.84
	77.9435	24019	77.9434	577.141	77.9429	25746	77.9429	11456.6	77.9433	7503.62	77.9428	11920.6	77.9428	14028.8	77.9423	9980.35	78.7505	864.499	77.9439	9772.83
	77.9435	36982.8	77.9434	37456.8	77.9429	13463.5	77.9429	12162	77.9433	11829.9	77.9428	11477.4	77.9428	11578.3	77.9423	10339.8	78.7505	55982.4	77.9439	10575.3
	77.9435	1088.66	77.9434	610.468	77.9429	29367.8	77.9429	1954.96	77.9433	10877.3	77.9428	14589.3	77.9428	1652.54	77.9423	10625	78.7505	707.008	77.9439	10727.1
	77.9435	34173	77.9434	39156.6	77.9429	13562.6	77.9429	11278.9	77.9433	10601.4	77.9428	16821.3	77.9428	10766.6	77.9423	11844.2	78.7505	52822.5	77.9439	11324.5
	77.9435	28541.3	77.9434	13498.2	77.9429	17132.9	77.9429	9564.5	77.9433	10411.4	77.9428	10921.8	77.9428	10960.5	77.9423	11890.2	78.7505	695.189	77.9439	11853.1
	77.9435	30078.6	77.9434	28670.7	77.9429	55525.8	77.9429	11379.4	77.9433	10045.4	77.9428	13591.6	77.9428	13644.9	77.9423	13564.1	78.7505	55972.5	77.9439	13945.7
	78.2407	54533.7	78.2406	37706	78.24	11432.7	78.24	9812.27	78.2404	10747.1	78.24	11031.4	78.24	10407	78.2395	8086.93	78.7505	53979.1	78.2411	2449.47
	78.2407	20773.5	78.2406	32201.7	78.24	17943.6	78.24	12848.4	78.2404	7615.66	78.24	11095	78.24	12618.2	78.2395	8807.18	78.7505	55340.4	78.2411	8811.9
	78.2407	58508	78.2406	48399.4	78.24	12831.9	78.24	11624.4	78.2404	10037.1	78.24	10638.9	78.24	11104.1	78.2395	8869.12	78.7505	63518.5	78.2411	9361.97
	78.2407	22603.5	78.2406	24601.8	78.24	23092.7	78.24	11435.1	78.2404	6562.37	78.24	17877.3	78.24	11787.8	78.2395	9412.08	79.0573	69496	78.2411	9819.45
	78.2407	63861.3	78.2406	43858.4	78.24	14925.1	78.24	12920.2	78.2404	10550.5	78.24	11950.5	78.24	14214.3	78.2395	9539.05	79.0573	45798.8	78.2411	10443.2
	78.2407	25071.2	78.2406	28737.1	78.24	28434.9	78.24	14632.2	78.2404	7774.1	78.24	35152.4	78.24	12954	78.2395	10154.8	79.0573	68309.8	78.2411	11242.4
	78.2407	48467.9	78.2406	14906.8	78.24	12420.8	78.24	12549.4	78.2404	10565.9	78.24	12852.2	78.24	11913.3	78.2395	11623.7	79.0573	889.891	78.2411	11576.5
	78.2407	24375.1	78.2406	622.151	78.24	23544.3	78.24	11908.4	78.2404	7350.44	78.24	11666.7	78.24	15462	78.2395	12231.8	79.0573	62559.6	78.2411	12059.1
	78.2407	42685.5	78.2406	39649.3	78.24	12884.1	78.24	12483.7	78.2404	11593.7	78.24	11269.8	78.24	11951	78.2395	12927.8	79.0573	649.35	78.2411	12520.6
	78.2407	1089.52	78.2406	624.811	78.24	27521.8	78.24	1963.78	78.2404	9533.65	78.24	14402.9	78.24	1666.83	78.2395	13177.1	79.0573	58234.2	78.2411	12921.8
	78.2407	38228	78.2406	41312.6	78.24	13107.8	78.24	11722.6	78.2404	10443.2	78.24	16367.3	78.24	11256.8	78.2395	13292.4	79.0573	593.314	78.2411	13006.9
	78.2407	31809.6	78.2406	14687.3	78.24	16100.2	78.24	9996.27	78.2404	10084.2	78.24	10675.9	78.24	11484.4	78.2395	14192.6	79.0573	63011.9	78.2411	14024.4
	78.2407	33413.9	78.2406	29848	78.24	55393	78.24	11899.8	78.2404	9753.77	78.24	13314.9	78.24	14382.5	78.2395	14450.4	79.0573	60491.1	78.2411	15760.7
	78.5379	68241.5	78.5379	40275.6	78.5372	11185.6	78.5372	10386.8	78.5376	10654.7	78.5372	10874.5	78.5372	10807.2	78.5367	11038.7	79.0573	60656.4	78.5382	2301.56
	78.5379	26041.6	78.5379	34454.9	78.5372	16639.5	78.5372	13487	78.5376	7537.56	78.5372	10947.8	78.5372	13285.4	78.5367	11663.6	79.0573	69038.4	78.5382	10320.3
	78.5379	73304.2	78.5379	51899.1	78.5372	12562.7	78.5372	12181.2	78.5376	9874.85	78.5372	10448.1	78.5372	11705.1	78.5367	12160.8	79.3642	79483.4	78.5382	10847.7
	78.5379	24796.6	78.5379	25996.2	78.5372	20599.5	78.5372	12502.8	78.5376	6520.44	78.5372	17253.3	78.5372	12499.1	78.5367	12279.2	79.3642	50189.4	78.5382	12191.4
	78.5379	77884.3	78.5379	46785.6	78.5372	14717.7	78.5372	13622.9	78.5376	10343.6	78.5372	11673	78.5372	14925.4	78.5367	13388.3	79.3642	79128.4	78.5382	12929.5
	78.5379	26825	78.5379	30172.5	78.5372	26162	78.5372	16038.6	78.5376	6908.81	78.5372	35151.7	78.5372	13666.9	78.5367	13622.8	79.3642	893.821	78.5382	14655.2
	78.5379	59594.3	78.5379	15874.7	78.5372	11941.4	78.5372	13387.5	78.5376	10450.2	78.5372	12552.9	78.5372	12591.4	78.5367	15078.8	79.3642	74213.4	78.5382	15253.1
	78.5379	25460.9	78.5379	607.627	78.5372	21100	78.5372	12892.7	78.5376	7250.56	78.5372	11423.2	78.5372	17892.3	78.5367	15711.5	79.3642	614.456	78.5382	15821.6
	78.5379	53803.8	78.5379	42539	78.5372	12350.9	78.5372	13213.5	78.5376	11393.8	78.5372	11114	78.5372	12762.5	78.5367	16099.9	79.3642	67871.1	78.5382	15877.6
	78.5379	1063.67	78.5379	662.606	78.5372	24883.1	78.5372	1965.9	78.5376	8405.14	78.5372	14153.5	78.5372	1663	78.5367	16760.5	79.3642	457.404	78.5382	16003.7
	78.5379	46136.5	78.5379	44144.1	78.5372	12723.3	78.5372	12528.3	78.5376	10316.7	78.5372	15925.9	78.5372	12168.7	78.5367	17269.9	79.3642	75068.8	78.5382	16880
	78.5379	38444.6	78.5379	15979.9	78.5372	15036.2	78.5372	10850.4	78.5376	9865.04	78.5372	10512.7	78.5372	12588.2	78.5367	17819	79.3642	71842.2	78.5382	17782.5
	78.5379	40149.7	78.5379	31507.7	78.5372	53843.7	78.5372	12773.6	78.5376	9563.98	78.5372	13032.1	78.5372	15727.8	78.5367	18188.3	79.3642	70353.7	78.5382	19077.4
	78.8351	90922.3	78.8351	43467.8	78.8344	11009.5	78.8344	11303.4	78.8348	10588.5	78.8343	10767.5	78.8344	11705.7	78.8338	15752.5	79.3642	79163.9	78.8354	2136.44
	78.8351	35728.1	78.8351	37438.5	78.8344	15317.1	78.8344	14527	78.8348	7502.6	78.8343	10843.7	78.8344	14566.4	78.8338	16118	79.6711	96630	78.8354	12795.6
	78.8351	97744.7	78.8351	56204.3	78.8344	12342.1	78.8344	13160.9	78.8348	9722.8	78.8343	10277.1	78.8344	12933.3	78.8338	16932.2	79.6711	58125.8	78.8354	13272.8
	78.8351	29484	78.8351	28169	78.8344	17982.8	78.8344	14424.2	78.8348	6514.04	78.8343	16396.4	78.8344	13792.9	78.8338	17438.8	79.6711	97518.3	78.8354	15929.3
	78.8351	101299	78.8351	50416.3	78.8344	14520.8	78.8344	14830.2	78.8348	10179	78.8343	11438.1	78.8344	16267.3	78.8338	18370.3	79.6711	879.011	78.8354	16795.2
	78.8351	31336.3	78.8351	32074.2	78.8344	23679.1	78.8344	18437	78.8348	6280.12	78.8343	34398.5	78.8344	15043.8	78.8338	19805.3	79.6711	93363.8	78.8354	20076.3
	78.8351	78737.5	78.8351	16362.2	78.8344	11684.3	78.8344	14808.5	78.8348	10374.2	78.8343	12374.3	78.8344	13884.3	78.8338	20099.9	79.6711	610.383	78.8354	20913.3
	78.8351	28090.9	78.8351	543.887	78.8344	18665.1	78.8344	14697.7	78.8348	7173.33	78.8343	11245.9	78.8344	21721	78.8338	20557.9	79.6711	84057.4	78.8354	21039.9
	78.8351	73130	78.8351	46170.3	78.8344	11987.6	78.8344	14594.9	78.8348	11252.8	78.8343	10999.7	78.8344	14265.5	78.8338	21054	79.6711	329.788	78.8354	21208
	78.8351	1015.15	78.8351	682.047	78.8344	21687.2	78.8344	1957.72	78.8348	7454.91	78.8343	13833	78.8344	1640.61	78.8338	22163	79.6711	94320.9	78.8354	21798.5
	78.8351	59929.2	78.8351	47691.1	78.8344	12470.3	78.8344	13902.4	78.8348	10227.9	78.8343	15619.6	78.8344	13790.4	78.8338	23947.2	79.6711	90265.4	78.8354	23023.3
	78.8351	50446.6	78.8351	17389.8	78.8344	14043.5	78.8344	12318.4	78.8348	9704.25	78.8343	10377.9	78.8344	14562.5	78.8338	24458.9	79.6711	86796	78.8354	23760.8
	78.8351	52336.2	78.8351	33696.6	78.8344	50947.5	78.8344	14167.6	78.8348	9436.32	78.8343	12780.9	78.8344	18022.7	78.8338	24862.9	79.6711	96461.7	78.8354	24568.5
	79.1323	124789	79.1323	47309.8	79.1315	10892.8	79.1315	12774.2	79.132	10543.1	79.1315	10659	79.1315	13327.5	79.131	22480	79.978	123910	79.1326	1967.25
	79.1323	51907.8	79.1323	41214.9	79.1315	14130.4	79.1315	16233.2	79.132	7498.71	79.1315	10723	79.1315	16776.7	79.131	22713.1	79.978	71537.2	79.1326	16584.5
	79.1323	134222	79.1323	61287.7	79.1315	12213.9	79.1315	14833.4	79.132	9605.81	79.1315	10109	79.1315	15098.3	79.131	23875.1	79.978	126475	79.1326	16963.1
	79.1323	38237.4	79.1323	31294.2	79.1315	15477.5	79.1315	17520.9	79.132	6542	79.1315	15362.9	79.1315	15957.9	79.131	25222.5	79.978	850.703	79.1326	21453.1
	79.1323	136499	79.1323	54700	79.1315	14376.6	79.1315	16802.2	79.132	10083.5	79.1315	11212.2	79.1315	18573.3	79.131	25410.7	79.978	122440	79.1326	22426.9
	79.1323	40675.1	79.1323	34498.3	79.1315	21244.9	79.1315	22319.1	79.132	5902.09	79.1315	32856.4	79.1315	17434	79.131	25652.6	79.978	642.591	79.1326	27964.7
	79.1323	108474	79.1323	16124.8	79.1315	11574.9	79.1315	17141.6	79.132	10342.8	79.1315	12246.7	79.1315	16110.6	79.131	27778.7	79.978	109358	79.1326	28349.4
	79.1323	33588.7	79.1323	456.813	79.1315	16469.3	79.1315	17714.7	79.132	7132.4	79.1315	11088.6	79.1315	27355.9	79.131	28514.2	79.978	246.063	79.1326	29226.3
	79.1323	103552	79.1323	50534.4	79.1315	11844.1	79.1315	16937.8	79.132	11195.3	79.1315	10889.3	79.1315	16793.6	79.131	29529.8	79.978	122808	79.1326	29554.2
	79.1323	952.484	79.1323	665.338	79.1315	18276.2	79.1315	1935.84	79.132	6760.13	79.1315	13496.6	79.1315	1606.57	79.131	30842.9	79.978	117867	79.1326	30331.9
	79.1323	81738.5	79.1323	51937.1	79.1315	12323.1	79.1315	16134.9	79.132	10197.4	79.1315	15309.5	79.1315	16494.7	79.131	33378.7	79.978	112569	79.1326	31882.6
	79.1323	70149.6	79.1323	18950	79.1315	13241.1	79.1315	14675.4	79.132	9631.95	79.1315	10275.3	79.1315	17754.7	79.131	33424.3	79.978	123783	79.1326	32523.7
	79.1323	72311.4	79.1323	36429	79.1315	46925.3	79.1315	16325.4	79.132	9391.48	79.1315	12590.5	79.1315	21698.4	79.131	34907.6	80.2848	163896	79.1326	32926.7
	79.4295	170447	79.4296	51791.7	79.4287	10895.2	79.4287	15097.3	79.4292	10531.8	79.4287	10534.5	79.4287	15969	79.4281	30779.7	80.2848	92514.1	79.4298	1810.47
	79.4295	76499.4	79.4296	45809.5	79.4287	13251.4	79.4287	18973.6	79.4292	7527.23	79.4287	10568.8	79.4287	20316	79.4281	32140.8	80.2848	168447	79.4298	21961.8
	79.4295	183396	79.4296	67103.8	79.4287	12270.7	79.4287	17547.2	79.4292	9559.14	79.4287	9958.09	79.4287	18547.7	79.4281	33113.3	80.2848	815.077	79.4298	22152.4
	79.4295	52863.2	79.4296	35453.8	79.4287	13299.2	79.4287	22215.4	79.4292	6623.75	79.4287	14228.4	79.4287	19332.3	79.4281	33354.2	80.2848	162972	79.4298	29028.1
	79.4295	184221	79.4296	59575.7	79.4287	14385.8	79.4287	19892.3	79.4292	10087.3	79.4287	11010.2	79.4287	22266.4	79.4281	34499.2	80.2848	705.942	79.4298	29990.9
	79.4295	57644.4	79.4296	37467.6	79.4287	19117.5	79.4287	28238.2	79.4292	5762.51	79.4287	30565.3	79.4287	21247.1	79.4281	35746.5	80.2848	145791	79.4298	38495.3
	79.4295	150290	79.4296	15037.1	79.4287	11701.1	79.4287	20782.6	79.4292	10387.9	79.4287	12148.5	79.4287	19650.9	79.4281	37052.7	80.2848	276.079	79.4298	38734.5
	79.4295	43774.4	79.4296	376.206	79.4287	14711.1	79.4287	22421.6	79.4292	7157.03	79.4287	10922.2	79.4287	35107.3	79.4281	39058.1	80.2848	161608	79.4298	40202.8
	79.4295	147006	79.4296	55577.4	79.4287	11929.3	79.4287	20608	79.4292	11247.4	79.4287	10769.9	79.4287	20729.7	79.4281	42093.4	80.2848	155730	79.4298	41161
	79.4295	883.595	79.4296	622.948	79.4287	15030.4	79.4287	1897.38	79.4292	6412.57	79.4287	13242.2	79.4287	1567.36	79.4281	42152.7	80.2848	149683	79.4298	41719.5
	79.4295	113054	79.4296	56825.4	79.4287	12389.3	79.4287	19571.8	79.4292	10262.8	79.4287	15004.5	79.4287	20681.3	79.4281	45085	80.2848	163383	79.4298	43717.2
	79.4295	99545.8	79.4296	20678.3	79.4287	12799.4	79.4287	18278.2	79.4292	9686.36	79.4287	10200.2	79.4287	22519.1	79.4281	45553.1	80.5917	217535	79.4298	44320.7
	79.4295	102002	79.4296	39697.1	79.4287	42123.5	79.4287	19566.4	79.4292	9457.97	79.4287	12385.6	79.4287	27202.6	79.4281	47964.1	80.5917	122642	79.4298	44650
	79.7267	225718	79.7268	56910.1	79.7259	11144.6	79.7258	18621.8	79.7264	10606.8	79.7258	10383.2	79.7259	19963.7	79.7253	40599.8	80.5917	224021	79.727	1680.53
	79.7267	110401	79.7268	51236.7	79.7259	12888.4	79.7258	23191.2	79.7264	7622.27	79.7258	10378.5	79.7259	25603.3	79.7253	41568.9	80.5917	780.582	79.727	28797.8
	79.7267	242925	79.7268	73653.4	79.7259	12677.3	79.7258	21689.1	79.7264	9640.11	79.7258	9830.78	79.7259	23616.5	79.7253	43748.7	80.5917	214432	79.727	28953.5
	79.7267	74800.5	79.7268	40536.8	79.7259	11646.4	79.7258	28953.1	79.7264	6800.94	79.7258	13074.1	79.7259	24239.7	79.7253	45123.2	80.5917	788.107	79.727	38567.6
	79.7267	242291	79.7268	65041.4	79.7259	14739	79.7258	24507.8	79.7264	10236.8	79.7258	10838.9	79.7259	27791.6	79.7253	45129.4	80.5917	193686	79.727	39229.2
	79.7267	85238.7	79.7268	40979	79.7259	17540.1	79.7258	36690.6	79.7264	5968.77	79.7258	27646.8	79.7259	26862.3	79.7253	48428.2	80.5917	381.735	79.727	51325.6
	79.7267	203311	79.7268	13161	79.7259	12314.8	79.7258	26121.4	79.7264	10582.2	79.7258	12051.7	79.7259	24872.4	79.7253	48708.1	80.5917	209839	79.727	52033.9
	79.7267	60674.3	79.7268	321.332	79.7259	13581	79.7258	29295.3	79.7264	7300.38	79.7258	10746.5	79.7259	45050.9	79.7253	51712.2	80.5917	202851	79.727	53999.9
	79.7267	203105	79.7268	61247.5	79.7259	12537.8	79.7258	25970.9	79.7264	11457.6	79.7258	10632.6	79.7259	26422.5	79.7253	55466.1	80.5917	198430	79.727	55673
	79.7267	814.487	79.7268	581.305	79.7259	12301.2	79.7258	1842.19	79.7264	6228.7	79.7258	13002.3	79.7259	1524.93	79.7253	57302.5	80.5917	215621	79.727	55684.7
	79.7267	153733	79.7268	62314.4	79.7259	12853.7	79.7258	24550	79.7264	10493.3	79.7258	14715.1	79.7259	26670.1	79.7253	58771.9	80.8986	282806	79.727	58235
	79.7267	139209	79.7268	22513.8	79.7259	12988.2	79.7258	23496.8	79.7264	9932.57	79.7258	10143.8	79.7259	29113.2	79.7253	59784.5	80.8986	162053	79.727	58802
	79.7267	141861	79.7268	43490.9	79.7259	36968.2	79.7258	24240.7	79.7264	9685	79.7258	12153	79.7259	34861.9	79.7253	63298.4	80.8986	290568	79.727	59747.5
	80.0239	285002	80.0241	62741.5	80.0231	12079.9	80.023	23661	80.0236	10887	80.023	10201.1	80.0231	25607	80.0224	49897.1	80.8986	757.178	80.0241	1586.86
	80.0239	152502	80.0241	57548.8	80.0231	13321.2	80.023	29314.6	80.0236	7926.46	80.023	10164.8	80.0231	32942.8	80.0224	50993.2	80.8986	273250	80.0241	36401.7
	80.0239	306793	80.0241	81072.5	80.0231	14160.6	80.023	27591.3	80.0236	9945.86	80.023	9724.13	80.0231	30526.4	80.0224	56195.8	80.8986	866.769	80.0241	37145.4
	80.0239	104178	80.0241	46183.5	80.0231	10731.4	80.023	38026	80.0236	7229.25	80.023	11971.3	80.0231	30876.4	80.0224	56585	80.8986	250544	80.0241	49316.1
	80.0239	304941	80.0241	71241	80.0231	16077.6	80.023	31001.2	80.0236	10614.3	80.023	10698	80.0231	35482.9	80.0224	58320	80.8986	486.519	80.0241	49452.1
	80.0239	125435	80.0241	45030.3	80.0231	16746.8	80.023	47914.6	80.0236	6614.43	80.023	24291.7	80.0231	34471.9	80.0224	60749.9	80.8986	263860	80.0241	65417.3
	80.0239	263314	80.0241	10747.2	80.0231	14162.9	80.023	33411.5	80.0236	11150	80.023	11934.4	80.0231	31997.7	80.0224	63098.9	80.8986	255348	80.0241	67524.5
	80.0239	85832.2	80.0241	293.826	80.0231	13314.5	80.023	38630.3	80.0236	7746.28	80.023	10571.5	80.0231	56884.4	80.0224	65271.9	80.8986	256248	80.0241	69799.4
	80.0239	267974	80.0241	67572.8	80.0231	14165.3	80.023	33266	80.0236	11971.3	80.023	10477.6	80.0231	34051.8	80.0224	69427.3	80.8986	277640	80.0241	71236.6
	80.0239	751.49	80.0241	564.947	80.0231	10379.1	80.023	1775.42	80.0236	6265.69	80.023	12797.2	80.0231	1477.98	80.0224	73035.7	81.2054	353864	80.0241	72109.3
	80.0239	201118	80.0241	68459.3	80.0231	14557.9	80.023	31285.4	80.0236	11158.8	80.023	14451.8	80.0231	34553.8	80.0224	73826.9	81.2054	208496	80.0241	74380.6
	80.0239	187129	80.0241	24254.9	80.0231	14219.2	80.023	30568.5	80.0236	10634.8	80.023	10098.2	80.0231	37549.9	80.0224	74621.4	81.2054	361511	80.0241	74807.3
	80.0239	189754	80.0241	47828.7	80.0231	31913.7	80.023	30620.4	80.0236	10286.7	80.023	11893.3	80.0231	44700.1	80.0224	79333.8	81.2054	751.118	80.0241	77460.8
	80.3212	339739	80.3213	69506.7	80.3202	14219.3	80.3202	30350.5	80.3208	11763.8	80.3201	9991.29	80.3202	33024.7	80.3196	56639.1	81.2054	332600	80.3213	1532.34
	80.3212	199013	80.3213	64897.3	80.3202	14941.7	80.3202	37595.7	80.3208	8665.61	80.3201	9948.21	80.3202	42341.3	80.3196	60565.2	81.2054	917.455	80.3213	43949.3
	80.3212	365826	80.3213	89706.5	80.3202	17262.9	80.3202	35378.4	80.3208	10820	80.3201	9630.12	80.3202	39247.4	80.3196	66171.4	81.2054	310473	80.3213	45582.9
	80.3212	138850	80.3213	51844.4	80.3202	10822.9	80.3202	49321.9	80.3208	7994.38	80.3201	11179	80.3202	39159.4	80.3196	69067.1	81.2054	577.785	80.3213	58876.8
	80.3212	363276	80.3213	78527	80.3202	19097.4	80.3202	39490.4	80.3208	11635.5	80.3201	10583	80.3202	45383.1	80.3196	71420.6	81.2054	317165	80.3213	60463.1
	80.3212	177514	80.3213	49666.6	80.3202	16985.5	80.3202	61625.8	80.3208	8483.59	80.3201	20732.7	80.3202	43895.5	80.3196	72229.6	81.2054	306471	80.3213	79035.5
	80.3212	322635	80.3213	8160.87	80.3202	17675.5	80.3202	42590.2	80.3208	12407.8	80.3201	11789.6	80.3202	40943.8	80.3196	77235.9	81.2054	317171	80.3213	83715.2
	80.3212	119285	80.3213	283.097	80.3202	14251.1	80.3202	50288.5	80.3208	8706.34	80.3201	10413	80.3202	69823.4	80.3196	77889.4	81.2054	342693	80.3213	86036.7
	80.3212	333954	80.3213	74742.7	80.3202	17280.5	80.3202	42420.2	80.3208	13223.7	80.3201	10314.3	80.3202	43470.8	80.3196	82097.5	81.5123	421312	80.3213	86650.2
	80.3212	703.083	80.3213	584.097	80.3202	9510.33	80.3202	1707.11	80.3208	6597.47	80.3201	12634.1	80.3202	1426.28	80.3196	85792.9	81.5123	256910	80.3213	88656.2
	80.3212	249760	80.3213	75485.6	80.3202	17876.4	80.3202	39717.8	80.3208	12500.1	80.3201	14224.8	80.3202	44048.9	80.3196	88009.3	81.5123	426845	80.3213	90325.8
	80.3212	238039	80.3213	25544.8	80.3202	17056.6	80.3202	39401.3	80.3208	12158.6	80.3201	10059.7	80.3202	47447.1	80.3196	89573.2	81.5123	759.188	80.3213	90366.6
	80.3212	240360	80.3213	52796.6	80.3202	27410.2	80.3202	38731.2	80.3208	11526.4	80.3201	11627.7	80.3202	56268.9	80.3196	93834.6	81.5123	383351	80.3213	96139.4
	80.6184	380136	80.6185	77567.7	80.6174	18155.8	80.6173	38481.7	80.618	13477.4	80.6173	9762.7	80.6174	42021.8	80.6167	60358.6	81.5123	925.455	80.6185	1513.39
	80.6184	243564	80.6185	73564.5	80.6174	18269.6	80.6173	47894	80.618	10093.3	80.6173	9748.78	80.6174	53339.6	80.6167	67739.4	81.5123	364720	80.6185	50053.3
	80.6184	409551	80.6185	100104	80.6174	22686.7	80.6173	44785.6	80.618	12575.6	80.6173	9540.8	80.6174	49366.1	80.6167	73360.1	81.5123	637.581	80.6185	52865
	80.6184	173989	80.6185	56969.6	80.6174	12270.1	80.6173	62082.2	80.618	9266.06	80.6173	10608.9	80.6174	48587.7	80.6167	79252.1	81.5123	361317	80.6185	66227.9
	80.6184	407063	80.6185	87445.9	80.6174	24531.7	80.6173	49651.2	80.618	13540.5	80.6173	10489.7	80.6174	57079.6	80.6167	80789.8	81.5123	347709	80.6185	69920.5
	80.6184	236593	80.6185	55027.7	80.6174	18538.7	80.6173	76779.7	80.618	11295.3	80.6173	17207.6	80.6174	54438.2	80.6167	82532.1	81.5123	372355	80.6185	90013.4
	80.6184	371400	80.6185	5766.16	80.6174	23609.6	80.6173	53102.3	80.618	14662	80.6173	11626.1	80.6174	51191.7	80.6167	87423.8	81.5123	400740	80.6185	98508.4
	80.6184	158553	80.6185	278.471	80.6174	16860.8	80.6173	63465	80.618	10439.6	80.6173	10284.6	80.6174	82591.4	80.6167	89036.4	81.8192	473887	80.6185	99702
	80.6184	390662	80.6185	83130.1	80.6174	22552.8	80.6173	52865.1	80.618	15507.6	80.6173	10157.7	80.6174	54090.9	80.6167	91346.6	81.8192	299919	80.6185	100575
	80.6184	672.969	80.6185	632.567	80.6174	9942.12	80.6173	1648.15	80.618	7592.66	80.6173	12506.5	80.6174	1373.66	80.6167	94760.3	81.8192	475128	80.6185	102921
	80.6184	292122	80.6185	83804.2	80.6174	23526.2	80.6173	49353.1	80.618	14870.2	80.6173	14044	80.6174	54405.8	80.6167	97709.3	81.8192	768.655	80.6185	103005
	80.6184	283839	80.6185	25946.1	80.6174	22159.9	80.6173	49399.6	80.618	14794.9	80.6173	10030	80.6174	57949.5	80.6167	102058	81.8192	416132	80.6185	103741
	80.6184	285649	80.6185	58578.2	80.6174	23893.8	80.6173	48169.5	80.618	13685.2	80.6173	11393.9	80.6174	68568.2	80.6167	104372	81.8192	894.259	80.6185	113391
	80.9156	397762	80.9158	87302.8	80.9146	24610.5	80.9145	47379.4	80.9151	16464.4	80.9145	9528.88	80.9146	51974.8	80.9139	60087.2	81.8192	403471	80.9157	1521.28
	80.9156	278364	80.9158	83901.2	80.9146	23895.8	80.9145	59482.5	80.9151	12572.4	80.9145	9582.98	80.9146	64942.1	80.9139	71148.6	81.8192	666.76	80.9157	53318.5
	80.9156	428953	80.9158	112863	80.9146	31205.8	80.9145	55023.3	80.9151	15557.8	80.9145	9451.17	80.9146	60028.6	80.9139	76357.4	81.8192	387864	80.9157	57469.4
	80.9156	202780	80.9158	61253.9	80.9146	15470.5	80.9145	74800.6	80.9151	11253.3	80.9145	10119.9	80.9146	58193.4	80.9139	84608.3	81.8192	370873	80.9157	69810.8
	80.9156	427398	80.9158	98589.9	80.9146	33249	80.9145	60575.2	80.9151	16750.7	80.9145	10414.6	80.9146	69630.8	80.9139	85292.2	81.8192	411865	80.9157	76041.8
	80.9156	293405	80.9158	61364.7	80.9146	21709.2	80.9145	91511.1	80.9151	15245.5	80.9145	13922.6	80.9146	64883.7	80.9139	89772.4	81.8192	440587	80.9157	96261.3
	80.9156	399902	80.9158	3822.23	80.9146	32648.9	80.9145	63817.4	80.9151	18369	80.9145	11464.5	80.9146	61760.9	80.9139	91983.8	82.126	501250	80.9157	108145
	80.9156	198252	80.9158	276.373	80.9146	21689.2	80.9145	76606	80.9151	13285.1	80.9145	10192.8	80.9146	93548.2	80.9139	95389.1	82.126	329406	80.9157	109601
	80.9156	427367	80.9158	93196.6	80.9146	30599.7	80.9145	63466.2	80.9151	19350.3	80.9145	10023.9	80.9146	64872.2	80.9139	96482.8	82.126	496456	80.9157	110319
	80.9156	677.519	80.9158	694.785	80.9146	11944.6	80.9145	1605.19	80.9151	9580.69	80.9145	12398.5	80.9146	1327.57	80.9139	98066.1	82.126	764.488	80.9157	111119
	80.9156	320254	80.9158	93909.3	80.9146	32164.5	80.9145	59182.4	80.9151	18747.3	80.9145	13920.7	80.9146	64440.6	80.9139	101861	82.126	423897	80.9157	112308
	80.9156	315365	80.9158	25093.2	80.9146	30122.9	80.9145	59409.1	80.9151	19014.7	80.9145	10019.2	80.9146	67790.8	80.9139	108934	82.126	843.413	80.9157	112449
	80.9156	316630	80.9158	65434.7	80.9146	21779.8	80.9145	57994.1	80.9151	17187.9	80.9145	11235.3	80.9146	80120.8	80.9139	108998	82.126	418464	80.9157	126524
	81.2128	388083	81.213	98843.9	81.2117	34150.2	81.2117	55903.9	81.2123	21239.3	81.2116	9307.86	81.2118	61836	81.2111	55671.6	82.126	676.217	81.2128	1543.45
	81.2128	296173	81.213	96106.1	81.2117	32307.6	81.2117	70987.6	81.2123	16495.7	81.2116	9467	81.2118	75710.8	81.2111	70018.3	82.126	390694	81.2128	52807.2
	81.2128	419148	81.213	128296	81.2117	43286.2	81.2117	64783.3	81.2123	20215.9	81.2116	9360.09	81.2118	70009.2	81.2111	74445	82.126	370476	81.2128	58221.5
	81.2128	218300	81.213	64788.8	81.2117	20753.2	81.2117	85389.7	81.2123	14162.8	81.2116	9708.13	81.2118	66646.9	81.2111	82674.1	82.126	427291	81.2128	68676.2
	81.2128	419305	81.213	112297	81.2117	45865.9	81.2117	70798.6	81.2123	21784	81.2116	10355.6	81.2118	81640.2	81.2111	85932.8	82.126	453043	81.2128	77432.6
	81.2128	336084	81.213	68978.4	81.2117	26736.5	81.2117	103385	81.2123	20588.5	81.2116	11024.7	81.2118	73673.7	81.2111	90477.6	82.4329	496953	81.2128	96361.5
	81.2128	401416	81.213	2433.17	81.2117	45070.2	81.2117	73138.2	81.2123	24003.1	81.2116	11332.3	81.2118	71329.1	81.2111	91747.7	82.4329	338752	81.2128	110288
	81.2128	230861	81.213	277.702	81.2117	29185.5	81.2117	87600.7	81.2123	17551.8	81.2116	10140.7	81.2118	100969	81.2111	93282.7	82.4329	485408	81.2128	110654
	81.2128	435960	81.213	105241	81.2117	41697	81.2117	72659.1	81.2123	25286	81.2116	9929.3	81.2118	74455.4	81.2111	94819.4	82.4329	738.886	81.2128	114318
	81.2128	707.079	81.213	756.63	81.2117	15756.5	81.2117	1578.39	81.2123	12520.9	81.2116	12294.6	81.2118	1296.07	81.2111	98134.9	82.4329	404063	81.2128	115026
	81.2128	327987	81.213	106124	81.2117	44082.8	81.2117	67770.1	81.2123	24613.7	81.2116	13873	81.2118	72716.6	81.2111	99498.7	82.4329	796.427	81.2128	115357
	81.2128	325067	81.213	22861.7	81.2117	41196.4	81.2117	67861.2	81.2123	25271	81.2116	10049.5	81.2118	75514.1	81.2111	106483	82.4329	405524	81.2128	115759
	81.2128	325964	81.213	73584.6	81.2117	21417.7	81.2117	66791.5	81.2123	22456.1	81.2116	11191.1	81.2118	89221.6	81.2111	108927	82.4329	677.236	81.2128	133186
	81.51	351946	81.5102	111734	81.5089	46856.5	81.5088	62636.4	81.5095	28292.5	81.5088	9122.33	81.5089	70282.8	81.5082	47856.1	82.4329	367983	81.51	1563.87
	81.51	292486	81.5102	109857	81.5089	43597.4	81.5088	80562.4	81.5095	22178.1	81.5088	9422.93	81.5089	84027.7	81.5082	64401.2	82.4329	345515	81.51	48401.3
	81.51	380931	81.5102	145973	81.5089	58692.6	81.5088	72449.6	81.5095	26933.7	81.5088	9273.44	81.5089	77914.1	81.5082	67811.3	82.4329	414303	81.51	54715.9
	81.51	215966	81.5102	67996.7	81.5089	28175	81.5088	91652.9	81.5095	18123.4	81.5088	9372.42	81.5089	72523.5	81.5082	75128.1	82.4329	433952	81.51	62818.6
	81.51	383292	81.5102	128247	81.5089	62339.9	81.5088	78563.9	81.5095	29076.1	81.5088	10315.5	81.5089	91485.8	81.5082	80876.1	82.7398	460484	81.51	73531.8
	81.51	353767	81.5102	78040	81.5089	33638.7	81.5088	109972	81.5095	27523.5	81.5088	8590.27	81.5089	79253.6	81.5082	82960.4	82.7398	324954	81.51	90020.4
	81.51	374364	81.5102	1561.02	81.5089	60368.3	81.5088	79331.2	81.5095	31902.7	81.5088	11262.6	81.5089	78484.9	81.5082	85212	82.7398	442815	81.51	103630
	81.51	248752	81.5102	281.62	81.5089	39419.8	81.5088	94267.5	81.5095	23385.6	81.5088	10137.4	81.5089	103423	81.5082	85409.3	82.7398	696.035	81.51	105477
	81.51	413438	81.5102	119026	81.5089	55440.6	81.5088	78803.5	81.5095	33670.4	81.5088	9896.19	81.5089	81417.4	81.5082	87929.2	82.7398	359380	81.51	109157
	81.51	746.543	81.5102	812.871	81.5089	21431.6	81.5088	1563.89	81.5095	16472.1	81.5088	12192.6	81.5089	1284.07	81.5082	90837.1	82.7398	766.721	81.51	110858
	81.51	312822	81.5102	120227	81.5089	58844.8	81.5088	73546.2	81.5095	32777.7	81.5088	13937.4	81.5089	77846.1	81.5082	93516.8	82.7398	365988	81.51	113469
	81.51	309591	81.5102	19458.9	81.5089	54953	81.5088	73127	81.5095	33823.2	81.5088	10160.8	81.5089	79798.5	81.5082	97250.8	82.7398	675.552	81.51	113655
	81.51	310443	81.5102	82968	81.5089	22977.6	81.5088	72956.6	81.5095	29753.1	81.5088	11295.6	81.5089	94309.9	81.5082	101627	82.7398	322922	81.51	131977
	81.8072	295389	81.8075	124650	81.8061	61990.2	81.806	66225	81.8067	37887.2	81.806	9000.31	81.8061	75983.3	81.8054	38049.4	82.7398	299906	81.8072	1563.85
	81.8072	267037	81.8075	123931	81.8061	57138.9	81.806	86308.6	81.8067	29689.1	81.806	9483.97	81.8061	88460.8	81.8054	55170.5	82.7398	374146	81.8072	40875.9
	81.8072	320598	81.8075	164318	81.8061	76165.9	81.806	76493.4	81.8067	35843.2	81.806	9211.43	81.8061	82470.3	81.8054	57508.5	82.7398	385796	81.8072	47490.7
	81.8072	195393	81.8075	71334.7	81.8061	37285.8	81.806	91946.2	81.8067	23080.1	81.806	9118.6	81.8061	74661.9	81.8054	63239.6	83.0467	397565	81.8072	53208
	81.8072	325240	81.8075	145107	81.8061	81583.9	81.806	82270.9	81.8067	38758	81.806	10313.9	81.8061	97646.1	81.8054	70637.6	83.0467	289737	81.8072	64825.1
	81.8072	340635	81.8075	88304.4	81.8061	42019.4	81.806	109584	81.8067	35990.2	81.806	6629.46	81.8061	80481	81.8054	70876.2	83.0467	375638	81.8072	78185.8
	81.8072	322933	81.8075	1081.48	81.8061	77012.1	81.806	81006.4	81.8067	42051	81.806	11300.7	81.8061	82040.1	81.8054	71405.7	83.0467	648.798	81.8072	90286
	81.8072	246801	81.8075	285.135	81.8061	51773.9	81.806	95000.3	81.8067	30610.1	81.806	10209.7	81.8061	100155	81.8054	72449.8	83.0467	297196	81.8072	94308.3
	81.8072	362930	81.8075	133413	81.8061	70508.2	81.806	80646.2	81.8067	44444.4	81.806	9963.05	81.8061	84580.3	81.8054	77224	83.0467	750.447	81.8072	97491.8
	81.8072	785.735	81.8075	865.666	81.8061	28629.2	81.806	1558.77	81.8067	21307.7	81.806	12116.4	81.8061	1292.4	81.8054	78807.8	83.0467	306427	81.8072	99500
	81.8072	276790	81.8075	135077	81.8061	75031	81.806	75239.1	81.8067	43137.2	81.806	14186.3	81.8061	78831.2	81.8054	82683.8	83.0467	669.304	81.8072	104402
	81.8072	271096	81.8075	15379	81.8061	70035.4	81.806	73984.7	81.8067	44510.7	81.806	10415.2	81.8061	79790.1	81.8054	83252.8	83.0467	262890	81.8072	105505
	81.8072	272239	81.8075	92959.9	81.8061	26285.5	81.806	75130.7	81.8067	38982	81.806	11587.6	81.8061	94359.5	81.8054	88199.4	83.0467	241367	81.8072	122844
	82.1044	227857	82.1047	135404	82.1032	77832.5	82.1032	65785.1	82.1039	49795.2	82.1031	8980.32	82.1033	77905.4	82.1025	27876.6	83.0467	313413	82.1044	1526.31
	82.1044	223996	82.1047	136075	82.1032	71397.9	82.1032	86832.8	82.1039	38669.9	82.1031	9699.56	82.1033	88120.6	82.1025	43775.5	83.0467	317064	82.1044	31638.3
	82.1044	248103	82.1047	180516	82.1032	93383.8	82.1032	75926.7	82.1039	46607.1	82.1031	9221.55	82.1033	82819.8	82.1025	45158.9	83.3535	318546	82.1044	37861.2
	82.1044	160680	82.1047	74898.4	82.1032	46980.9	82.1032	85769.9	82.1039	28696.1	82.1031	8964.04	82.1033	72492.4	82.1025	49022.5	83.3535	239134	82.1044	41493.9
	82.1044	254694	82.1047	160435	82.1032	101326	82.1032	80962.2	82.1039	50417.5	82.1031	10402.2	82.1033	99035.7	82.1025	55099.7	83.3535	294965	82.1044	52723.9
	82.1044	298373	82.1047	98821.8	82.1032	50935.7	82.1032	101869	82.1039	45453.5	82.1031	5102.81	82.1033	76952.1	82.1025	55518.7	83.3535	609.965	82.1044	62777.6
	82.1044	255869	82.1047	849.244	82.1032	92524.4	82.1032	77568.1	82.1039	53859.1	82.1031	11517	82.1033	81307.7	82.1025	57008.7	83.3535	227379	82.1044	72800.3
	82.1044	224405	82.1047	289.195	82.1032	64764.3	82.1032	89318.7	82.1039	38604.1	82.1031	10410.2	82.1033	91333.8	82.1025	57531.4	83.3535	729.779	82.1044	78478.3
	82.1044	292833	82.1047	146230	82.1032	84700.7	82.1032	77707.9	82.1039	56922.2	82.1031	10198.5	82.1033	83290.9	82.1025	60777.2	83.3535	236718	82.1044	81101.2
	82.1044	814.655	82.1047	914.684	82.1032	36458.9	82.1032	1563.7	82.1039	26626.3	82.1031	12126.9	82.1033	1314.35	82.1025	65051.4	83.3535	650.143	82.1044	83025.4
	82.1044	225905	82.1047	148475	82.1032	90284	82.1032	72285.3	82.1039	54971.2	82.1031	14751.1	82.1033	75335.9	82.1025	65773.8	83.3535	197352	82.1044	89863.9
	82.1044	216654	82.1047	11237.3	82.1032	84183.8	82.1032	70024.9	82.1039	56553.6	82.1031	10992.7	82.1033	75327.5	82.1025	68908.5	83.3535	179165	82.1044	91745.1
	82.1044	218295	82.1047	102194	82.1032	30687.7	82.1032	72635.4	82.1039	49499.7	82.1031	12124.5	82.1033	89158.4	82.1025	70777.4	83.3535	242150	82.1044	107110
	82.4016	159513	82.4019	141346	82.4004	91874.2	82.4003	61193	82.4011	63083.4	82.4003	9124.29	82.4005	75575.5	82.3997	18715.3	83.3535	239604	82.4016	1444.1
	82.4016	170739	82.4019	143357	82.4004	84058.9	82.4003	81721.1	82.4011	48221.1	82.4003	10144.8	82.4005	82892.8	82.3997	31852.3	83.6604	235511	82.4016	22256.7
	82.4016	174276	82.4019	190943	82.4004	107347	82.4003	70631.9	82.4011	58265.7	82.4003	9393.55	82.4005	78731.1	82.3997	32520.3	83.6604	181663	82.4016	27487.4
	82.4016	118890	82.4019	78139.7	82.4004	55580.4	82.4003	74008.7	82.4011	34324.5	82.4003	8946.82	82.4005	66210.8	82.3997	34646.5	83.6604	212896	82.4016	29509.8
	82.4016	182214	82.4019	171032	82.4004	118402	82.4003	74649	82.4011	62952.9	82.4003	10680.6	82.4005	95257.2	82.3997	38862.8	83.6604	584.015	82.4016	39152.4
	82.4016	235691	82.4019	107841	82.4004	58938.4	82.4003	87986.5	82.4011	54803.5	82.4003	3943.31	82.4005	69126.1	82.3997	39856.7	83.6604	159672	82.4016	46143.1
	82.4016	183902	82.4019	745.669	82.4004	103983	82.4003	69439.5	82.4011	66067.3	82.4003	12026.3	82.4005	76265.7	82.3997	41105.7	83.6604	683.925	82.4016	53865.7
	82.4016	185854	82.4019	302.686	82.4004	76170.2	82.4003	78070.1	82.4011	46295.9	82.4003	10823.7	82.4005	78074.3	82.3997	42850.1	83.6604	167244	82.4016	60337.5
	82.4016	214391	82.4019	154577	82.4004	95364.5	82.4003	70427.2	82.4011	69713.6	82.4003	10719	82.4005	77588.3	82.3997	43831.5	83.6604	607.204	82.4016	62408.3
	82.4016	829.824	82.4019	946.817	82.4004	43519.3	82.4003	1580.95	82.4011	31725.1	82.4003	12335.3	82.4005	1340.17	82.3997	46856.7	83.6604	135289	82.4016	63908.4
	82.4016	168417	82.4019	157459	82.4004	101764	82.4003	65040.1	82.4011	66880.7	82.4003	15848.5	82.4005	67793	82.3997	50760.3	83.6604	121622	82.4016	71986.8
	82.4016	155933	82.4019	7570.56	82.4004	94665	82.4003	61814.7	82.4011	68500.6	82.4003	12253.8	82.4005	66992.6	82.3997	51949.9	83.6604	170999	82.4016	74405.2
	82.4016	158087	82.4019	108681	82.4004	35064.3	82.4003	65718.7	82.4011	60050.1	82.4003	13073.2	82.4005	79382.3	82.3997	52590.8	83.6604	165081	82.4016	87125.2
	82.6988	98681.4	82.6992	140158	82.6976	101396	82.6975	53146	82.6983	76096.6	82.6974	9540.72	82.6976	69206.7	82.6968	11397.1	83.9673	159155	82.6987	1303.71
	82.6988	115671	82.6992	143052	82.6976	92538.4	82.6975	71715.2	82.6983	56960	82.6974	10937.3	82.6976	73474.7	82.6968	20829.7	83.9673	125852	82.6987	13998.6
	82.6988	108119	82.6992	192154	82.6976	115154	82.6975	61423	82.6983	69265	82.6974	9875.01	82.6976	70669.4	82.6968	21064.7	83.9673	139480	82.6987	17872.4
	82.6988	77533.2	82.6992	79892.6	82.6976	61206.5	82.6975	58680.2	82.6983	39104.7	82.6974	9142.63	82.6976	56735.8	82.6968	21877.4	83.9673	547.58	82.6987	18783.5
	82.6988	116731	82.6992	173769	82.6976	129500	82.6975	64328.2	82.6983	74633.8	82.6974	11312.9	82.6976	86705.8	82.6968	24569	83.9673	101425	82.6987	26008.6
	82.6988	165082	82.6992	113092	82.6976	64354.7	82.6975	70264	82.6983	62486.6	82.6974	3076.88	82.6976	58202.5	82.6968	25583.1	83.9673	592.182	82.6987	30448.3
	82.6988	116830	82.6992	697.605	82.6976	108842	82.6975	57954.3	82.6983	76869.6	82.6974	13191.7	82.6976	67564.8	82.6968	26626.9	83.9673	106271	82.6987	35978.8
	82.6988	138803	82.6992	336.579	82.6976	83541.6	82.6975	63180.1	82.6983	52339.3	82.6974	11682.1	82.6976	62189.2	82.6968	28385.6	83.9673	532.532	82.6987	42296.4
	82.6988	138637	82.6992	155610	82.6976	100126	82.6975	60006.6	82.6983	80883.1	82.6974	11906.1	82.6976	68211.9	82.6968	28744.4	83.9673	83118	82.6987	43872.3
	82.6988	833.715	82.6992	935.372	82.6976	48206.4	82.6975	1608.99	82.6983	35688.3	82.6974	12918.8	82.6976	1358.85	82.6968	30244.5	83.9673	74284.8	82.6987	44725.5
	82.6988	112533	82.6992	159093	82.6976	106937	82.6975	54684.1	82.6983	76977.3	82.6974	18837.3	82.6976	57305.7	82.6968	34120.6	83.9673	108491	82.6987	53203.3
	82.6988	98232.5	82.6992	4697.94	82.6976	99043.8	82.6975	50737.3	82.6983	78425.3	82.6974	14334.8	82.6976	55971.3	82.6968	35765.9	83.9673	102011	82.6987	55871.8
	82.6988	100746	82.6992	110320	82.6976	38068.8	82.6975	55500.1	82.6983	68919.4	82.6974	15059.8	82.6976	66430.6	82.6968	36436.3	84.2741	96528.8	82.6987	65672.4
	82.996	50272.1	82.9964	130737	82.9947	104272	82.9946	42956.7	82.9955	86722.8	82.9946	10413.2	82.9948	59659.7	82.994	6152.64	84.2741	78101.5	82.9959	1052.98
	82.996	65965.3	82.9964	133731	82.9947	94763.7	82.9946	58498	82.9955	63292	82.9946	12745	82.9948	61204.2	82.994	11659.3	84.2741	80766.5	82.9959	7565.37
	82.996	55092.2	82.9964	182106	82.9947	114909	82.9946	49804.1	82.9955	77732.8	82.9946	11015.1	82.9948	59701.3	82.994	11710.2	84.2741	502.646	82.9959	9999.17
	82.996	42280.7	82.9964	78760	82.9947	62371.2	82.9946	42295.1	82.9955	42176.9	82.9946	9684.87	82.9948	45464.2	82.994	11739.9	84.2741	56424.1	82.9959	10230.1
	82.996	63808.1	82.9964	166640	82.9947	132141	82.9946	51684.4	82.9955	83427.1	82.9946	12884.7	82.9948	74495.6	82.994	13266.8	84.2741	370.33	82.9959	14711.9
	82.996	98496.7	82.9964	112465	82.9947	65766.5	82.9946	51487.3	82.9955	66887.1	82.9946	2437.11	82.9948	45797.5	82.994	13930.9	84.2741	58426	82.9959	17217.4
	82.996	61315.9	82.9964	672.15	82.9947	105770	82.9946	44956.9	82.9955	84293.6	82.9946	15807.1	82.9948	56381	82.994	14767.1	84.2741	425.098	82.9959	20890.5
	82.996	91604.8	82.9964	390.491	82.9947	84964	82.9946	47055	82.9955	55456.4	82.9946	13577.5	82.9948	45750	82.994	15724.3	84.2741	43766.2	82.9959	26286.8
	82.996	73799.9	82.9964	147576	82.9947	97674.5	82.9946	48042.9	82.9955	88367.4	82.9946	14265.1	82.9948	56440.1	82.994	16597.1	84.2741	39297.4	82.9959	27447.2
	82.996	830.882	82.9964	852.302	82.9947	49223	82.9946	1638.86	82.9955	37606.6	82.9946	14441	82.9948	1361.41	82.994	16622.4	84.2741	59443.6	82.9959	27571.9
	82.996	64457.9	82.9964	151510	82.9947	104406	82.9946	42864.8	82.9955	83318.6	82.9946	23920.7	82.9948	45368.6	82.994	19003.1	84.2741	54387.8	82.9959	35686.2
	82.996	50100.7	82.9964	2693.1	82.9947	96013.7	82.9946	38571.4	82.9955	84375.8	82.9946	17623.3	82.9948	43768.7	82.994	22148.9	84.581	51447.8	82.9959	38338.5
	82.996	52738.4	82.9964	105651	82.9947	38552.2	82.9946	43635.3	82.9955	74332	82.9946	18061.4	82.9948	52078.5	82.994	22410.8	84.581	41713.9	82.9959	45316.2
	83.2932	15551.5	83.2936	113773	83.2919	99684.3	83.2918	32170.8	83.2926	92906.8	83.2918	12428	83.292	48241.4	83.2912	2754.92	84.581	43808.3	83.2931	872.786
	83.2932	26069.8	83.2936	116023	83.2919	89907.3	83.2918	44176.4	83.2926	65842.8	83.2918	15629.2	83.292	47736.3	83.2912	4477.24	84.581	429.665	83.2931	3080.19
	83.2932	16779.7	83.2936	161093	83.2919	106385	83.2918	37528.4	83.2926	81956.6	83.2918	13492.6	83.292	47256.9	83.2912	4731.84	84.581	31437.6	83.2931	4100.25
	83.2932	15849.8	83.2936	73723.1	83.2919	58530.4	83.2918	27118.5	83.2926	42940.8	83.2918	10775.3	83.292	33912.8	83.2912	4764.54	84.581	141.413	83.2931	4219.37
	83.2932	25227.9	83.2936	149615	83.2919	125497	83.2918	38599.2	83.2926	87528.3	83.2918	16005.4	83.292	60220.6	83.2912	5166.2	84.581	31845.3	83.2931	5983.07
	83.2932	44000.1	83.2936	104862	83.2919	62508.3	83.2918	34128	83.2926	66846.3	83.2918	1971.81	83.292	33536.9	83.2912	5336.85	84.581	264.821	83.2931	7145.52
	83.2932	20077.8	83.2936	659.65	83.2919	95142.9	83.2918	32281.5	83.2926	86740.8	83.2918	20080.4	83.292	44153	83.2912	5937.15	84.581	26048.7	83.2931	9381.28
	83.2932	50776.4	83.2936	442.417	83.2919	79764.4	83.2918	31896.4	83.2926	54839	83.2918	16584.3	83.292	30599.9	83.2912	6309.28	84.581	22678.8	83.2931	13442.5
	83.2932	24020.3	83.2936	130629	83.2919	88245.8	83.2918	36101.3	83.2926	90545.3	83.2918	18084.3	83.292	43799.7	83.2912	6415.73	84.581	32868.9	83.2931	13703.5
	83.2932	823.017	83.2936	686.56	83.2919	46073.4	83.2918	1656.59	83.2926	36871.2	83.2918	17793.9	83.292	1342.72	83.2912	7194.94	84.581	31447.8	83.2931	14268
	83.2932	27384.7	83.2936	134769	83.2919	94427.6	83.2918	31228.5	83.2926	84467	83.2918	31815.4	83.292	33504.5	83.2912	7399.22	84.8879	28570.7	83.2931	20936.5
	83.2932	14359	83.2936	1447.16	83.2919	85907.5	83.2918	26987.8	83.2926	84948.3	83.2918	22586.7	83.292	31864.9	83.2912	10722.2	84.8879	23324.2	83.2931	23374.4
	83.2932	16905.1	83.2936	94536.4	83.2919	35993.6	83.2918	31843.1	83.2926	74980.5	83.2918	22476.4	83.292	38060.8	83.2912	11659.4	84.8879	23882	83.2931	27903.1
	83.5904	865.156	83.5909	91659.8	83.5891	88415	83.589	22162.2	83.5898	93247.5	83.5889	16106.7	83.5892	36401.1	83.5883	1240.24	84.8879	323.414	83.5903	824.589
	83.5904	1297.36	83.5909	92586.4	83.5891	78730.9	83.589	30686.8	83.5898	63898.8	83.5889	19976.2	83.5892	34666.8	83.5883	1360.06	84.8879	16563.1	83.5903	1135.55
	83.5904	920.001	83.5909	131879	83.5891	91132.2	83.589	26139.8	83.5898	80902.1	83.5889	17545	83.5892	34814.5	83.5883	1486.23	84.8879	-27.6583	83.5903	1315.21
	83.5904	1524.18	83.5909	64675.7	83.5891	50322.8	83.589	14643	83.5898	41239.1	83.5889	13266.3	83.5892	23368.6	83.5883	1499.96	84.8879	17029.5	83.5903	1528.73
	83.5904	1133.93	83.5909	124841	83.5891	110693	83.589	26667.6	83.5898	85915.3	83.5889	21008.8	83.5892	45606.8	83.5883	1536.35	84.8879	55.5024	83.5903	1608.19
	83.5904	4620.11	83.5909	90778.8	83.5891	54953.1	83.589	19806.6	83.5898	62097.6	83.5889	1634.29	83.5892	22700.9	83.5883	1550.23	84.8879	16181.2	83.5903	1781.1
	83.5904	1030.27	83.5909	656.539	83.5891	78946.1	83.589	21313.3	83.5898	83492.6	83.5889	26590.9	83.5892	32275.8	83.5883	1583.66	84.8879	15818.6	83.5903	2660.9
	83.5904	19662.6	83.5909	451.768	83.5891	68810.2	83.589	19200.7	83.5898	50439.4	83.5889	21098.4	83.5892	17987.8	83.5883	1748.94	84.8879	17576.3	83.5903	3479.38
	83.5904	1270.93	83.5909	106986	83.5891	73578.1	83.589	25383.2	83.5898	86751	83.5889	23830.8	83.5892	31728.3	83.5883	1820.58	84.8879	20116.8	83.5903	4059.36
	83.5904	806.041	83.5909	477.575	83.5891	39286	83.589	1650.76	83.5898	33417.3	83.5889	23158.5	83.5892	1301.67	83.5883	1857.18	85.1948	14727.7	83.5903	4622.93
	83.5904	1598.34	83.5909	111034	83.5891	78850.2	83.589	21028.5	83.5898	79956.2	83.5889	43182.8	83.5892	22935.1	83.5883	2139.85	85.1948	11915.9	83.5903	9623.93
	83.5904	630.914	83.5909	654.768	83.5891	70624.5	83.589	17163.7	83.5898	79762.3	83.5889	29647.9	83.5892	21414.8	83.5883	2404.73	85.1948	12080.7	83.5903	11732.6
	83.5904	969.004	83.5909	78375.3	83.5891	30712.2	83.589	21480.1	83.5898	70477.7	83.5889	28713.7	83.5892	25722.6	83.5883	3775.75	85.1948	194.373	83.5903	14341.2
	83.8876	362.055	83.8881	67771.6	83.8862	72587.6	83.8861	13850.2	83.887	87447.4	83.8861	21812.3	83.8864	25414.2	83.8855	758.416	85.1948	8022.77	83.8875	718.928
	83.8876	742.37	83.8881	67240.4	83.8862	63354.4	83.8861	19358.1	83.887	57666.9	83.8861	26137.9	83.8864	23218.6	83.8855	777.572	85.1948	-85.7898	83.8875	825.771
	83.8876	421.246	83.8881	98895.4	83.8862	71973	83.8861	16659	83.887	74561.8	83.8861	23610.7	83.8864	23597.7	83.8855	822.35	85.1948	8429.28	83.8875	863.859
	83.8876	859.51	83.8881	52590.7	83.8862	39356	83.8861	5430.1	83.887	37382.3	83.8861	17808.2	83.8864	14656.9	83.8855	930.224	85.1948	-144.708	83.8875	921.35
	83.8876	694.024	83.8881	96045.7	83.8862	90446.9	83.8861	16888.7	83.887	78698	83.8861	28407	83.8864	32155.2	83.8855	1031.34	85.1948	10684	83.8875	1046.57
	83.8876	945.754	83.8881	72282.6	83.8862	44424.3	83.8861	9136.77	83.887	53406	83.8861	1386.23	83.8864	14024	83.8855	1067.69	85.1948	12038	83.8875	1154.46
	83.8876	378.152	83.8881	654.551	83.8862	60126.3	83.8861	12771.9	83.887	74971	83.8861	35785.5	83.8864	21834.8	83.8855	1068.06	85.1948	8754.84	83.8875	1692.87
	83.8876	1239.92	83.8881	377.014	83.8862	54227	83.8861	9590.68	83.887	43012	83.8861	27459	83.8864	8428.99	83.8855	1095.01	85.1948	13858.5	83.8875	1830.46
	83.8876	606.996	83.8881	80273.4	83.8862	56340.4	83.8861	16570.6	83.887	77512.2	83.8861	31807.5	83.8864	21293.1	83.8855	1173.79	85.5016	7116.57	83.8875	1940.29
	83.8876	771.245	83.8881	276.186	83.8862	30232.9	83.8861	1619.47	83.887	27790.5	83.8861	30907.7	83.8864	1209.91	83.8855	1182.25	85.5016	5518.86	83.8875	2009.25
	83.8876	720.27	83.8881	83952.7	83.8862	60505.7	83.8861	12935.7	83.887	70469.9	83.8861	58194.8	83.8864	14386.7	83.8855	1355.27	85.5016	5733.96	83.8875	3237.23
	83.8876	244.629	83.8881	210.378	83.8862	52989.8	83.8861	9630.84	83.887	69621.9	83.8861	38952.3	83.8864	13075.7	83.8855	1482.44	85.5016	62.3362	83.8875	4171.44
	83.8876	466.149	83.8881	59705.4	83.8862	23733.4	83.8861	13303.5	83.887	61521.8	83.8861	37015.1	83.8864	15831.6	83.8855	1601.23	85.5016	3579.7	83.8875	4671.12
	84.1848	93.0829	84.1853	45402.5	84.1834	54973.4	84.1833	7860.04	84.1842	76428.9	84.1833	29943	84.1835	16152.3	84.1826	411.592	85.5016	-25.0507	84.1846	422.666
	84.1848	418.264	84.1853	43690.6	84.1834	46545.7	84.1833	11100.9	84.1842	48231.2	84.1833	34257.3	84.1835	14073.5	84.1826	435.2	85.5016	3887.6	84.1846	502.52
	84.1848	154.658	84.1853	66854.5	84.1834	52108.7	84.1833	9803.7	84.1842	63981.5	84.1833	31933.6	84.1835	14376.6	84.1826	537.688	85.5016	-302.603	84.1846	620.245
	84.1848	503.452	84.1853	39210.9	84.1834	27636.5	84.1833	3420.57	84.1842	32016.3	84.1833	24197.7	84.1835	8602.52	84.1826	589.096	85.5016	7905.06	84.1846	723.445
	84.1848	454.006	84.1853	67391.3	84.1834	68214.8	84.1833	9728.48	84.1842	67107.1	84.1833	38460.4	84.1835	20882.1	84.1826	621.241	85.5016	10129.5	84.1846	790.412
	84.1848	670.457	84.1853	52333.3	84.1834	32759.2	84.1833	4629.02	84.1842	42334.4	84.1833	1226.93	84.1835	7719.53	84.1826	770.89	85.5016	4144.73	84.1846	1119.07
	84.1848	19.9556	84.1853	638.491	84.1834	41677.6	84.1833	6737.96	84.1842	62629.9	84.1833	47711.4	84.1835	13452.4	84.1826	776.353	85.5016	10747.2	84.1846	1351.85
	84.1848	829.161	84.1853	222.175	84.1834	38664.3	84.1833	5107.48	84.1842	33877.9	84.1833	35754.6	84.1835	4719.56	84.1826	804.846	85.8085	3301.57	84.1846	1403.79
	84.1848	229.782	84.1853	54364.9	84.1834	39296.7	84.1833	10431.6	84.1842	64402.7	84.1833	41919.7	84.1835	13048.1	84.1826	806.511	85.8085	2269.48	84.1846	1483.02
	84.1848	710.044	84.1853	97.5727	84.1834	20630.5	84.1833	1571.03	84.1842	20983.5	84.1833	40991.2	84.1835	1088.19	84.1826	852.513	85.8085	2643.16	84.1846	1506.99
	84.1848	398.526	84.1853	57482.9	84.1834	42320.1	84.1833	7456.32	84.1842	57645.5	84.1833	76128.9	84.1835	8412.35	84.1826	960.947	85.8085	-51.2904	84.1846	2426.1
	84.1848	36.2455	84.1853	51.3978	84.1834	35847.5	84.1833	4935.95	84.1842	56282.3	84.1833	50089.2	84.1835	7406.17	84.1826	1091.61	85.8085	1497.02	84.1846	2933.12
	84.1848	192.095	84.1853	41356.6	84.1834	16376.3	84.1833	7461.15	84.1842	49687.2	84.1833	47206.7	84.1835	9044.15	84.1826	1116.63	85.8085	113.732	84.1846	3504.72
	84.482	-37.6732	84.4826	27603.1	84.4806	38174	84.4805	4662.52	84.4814	62065.7	84.4804	40533.7	84.4807	9398.45	84.4798	224.506	85.8085	1698.2	84.4818	202.899
	84.482	247.684	84.4826	25268.5	84.4806	30861.3	84.4805	6703.4	84.4814	37216.9	84.4804	44081.1	84.4807	8511.74	84.4798	233.409	85.8085	-387.4	84.4818	399.256
	84.482	26.1459	84.4826	39879.5	84.4806	34222.9	84.4805	5973.48	84.4814	50947.5	84.4804	42353.1	84.4807	8496.44	84.4798	368.094	85.8085	6621.12	84.4818	494.489
	84.482	331.351	84.4826	26430.3	84.4806	16928.6	84.4805	2740.42	84.4814	25913.1	84.4804	32314.1	84.4807	5717.9	84.4798	417.76	85.8085	9236.4	84.4818	554.741
	84.482	334.712	84.4826	42281.8	84.4806	47193.7	84.4805	6580.81	84.4814	53119.4	84.4804	50913	84.4807	12610.1	84.4798	419.012	85.8085	1954.73	84.4818	592.508
	84.482	527.55	84.4826	33799.7	84.4806	21727.8	84.4805	3697.49	84.4814	30741.4	84.4804	1130.52	84.4807	5692.2	84.4798	543.604	85.8085	9362.02	84.4818	1156.26
	84.482	-158.383	84.4826	566.814	84.4806	25852.9	84.4805	4867.47	84.4814	48518.1	84.4804	61745.6	84.4807	8317.5	84.4798	636.56	86.1154	1547.46	84.4818	1160.22
	84.482	602.899	84.4826	72.3868	84.4806	24460.9	84.4805	3872.06	84.4814	24513.2	84.4804	45595.1	84.4807	3671.94	84.4798	651.787	86.1154	761.574	84.4818	1175.14
	84.482	35.1744	84.4826	32701.8	84.4806	24565.9	84.4805	6865.81	84.4814	49569.8	84.4804	53473.7	84.4807	8124.82	84.4798	664.174	86.1154	1297.89	84.4818	1257.85
	84.482	569.935	84.4826	-28.0704	84.4806	11973.6	84.4805	1495.06	84.4814	14111.8	84.4804	52690.9	84.4807	974.109	84.4798	668.532	86.1154	-127.558	84.4818	1334.26
	84.482	233.227	84.4826	34907.3	84.4806	26534.2	84.4805	5318.13	84.4814	43581.9	84.4804	95136.5	84.4807	5461.22	84.4798	735.096	86.1154	627.691	84.4818	1947.92
	84.482	-65.1714	84.4826	15.9443	84.4806	21289.2	84.4805	3674.6	84.4814	41916.3	84.4804	61914.8	84.4807	5155.45	84.4798	837.24	86.1154	261.694	84.4818	2170.63
	84.482	57.1842	84.4826	25772.1	84.4806	10519.1	84.4805	4957.42	84.4814	36931.5	84.4804	58483.3	84.4807	6114.46	84.4798	873.457	86.1154	731.047	84.4818	2800.93
	84.7792	-95.448	84.7798	16412.4	84.7778	24007.6	84.7776	2666.63	84.7786	46635	84.7776	53031.2	84.7779	5725.07	84.7769	127.932	86.1154	-385.231	84.779	91.7285
	84.7792	166.373	84.7798	14578.7	84.7778	18007.6	84.7776	3916.46	84.7786	26308.2	84.7776	54817.1	84.7779	5030.37	84.7769	135.654	86.1154	6066.54	84.779	353.587
	84.7792	-29.9341	84.7798	24330.6	84.7778	19923.1	84.7776	3528.69	84.7786	37463.7	84.7776	54129	84.7779	5160.04	84.7769	228.953	86.1154	8843.24	84.779	426.815
	84.7792	255.227	84.7798	16796.2	84.7778	9068.96	84.7776	2369.44	84.7786	19783.8	84.7776	41526.6	84.7779	3863.85	84.7769	336.074	86.1154	997.258	84.779	474.278
	84.7792	280.748	84.7798	25910.1	84.7778	29586.1	84.7776	4599.02	84.7786	38877.5	84.7776	64785.9	84.7779	7899.24	84.7769	369.3	86.1154	8806.75	84.779	489.457
	84.7792	460.42	84.7798	20288.7	84.7778	12836.8	84.7776	3166.8	84.7786	20239.8	84.7776	1075.78	84.7779	4443.44	84.7769	418.862	86.4222	798.387	84.779	1005.07
	84.7792	-238.73	84.7798	434.567	84.7778	13775.3	84.7776	3974.67	84.7786	34692.7	84.7776	76454.5	84.7779	5127.55	84.7769	556.625	86.4222	104.383	84.779	1030.87
	84.7792	489.61	84.7798	-91.1905	84.7778	13100.3	84.7776	3148.68	84.7786	16141.1	84.7776	55961.2	84.7779	3054.09	84.7769	565.3	86.4222	798.066	84.779	1049.67
	84.7792	-56.3114	84.7798	19950.5	84.7778	13243.2	84.7776	4432.28	84.7786	35130.2	84.7776	65126.4	84.7779	5110.17	84.7769	577.172	86.4222	-151.045	84.779	1118.39
	84.7792	371.096	84.7798	-89.678	84.7778	6973.81	84.7776	1382.59	84.7786	8081.92	84.7776	64542	84.7779	897.073	84.7769	591.336	86.4222	306.945	84.779	1411.64
	84.7792	156.668	84.7798	21325.5	84.7778	14311.7	84.7776	3993.87	84.7786	30252.6	84.7776	112401	84.7779	3611.55	84.7769	610.35	86.4222	356.314	84.779	1691.04
	84.7792	-109.906	84.7798	3.17615	84.7778	11147.9	84.7776	2913.51	84.7786	28506.4	84.7776	72632.2	84.7779	3765.96	84.7769	686.173	86.4222	341.727	84.779	1729.77
	84.7792	-3.25525	84.7798	15836.7	84.7778	6631.09	84.7776	3866.06	84.7786	25035.1	84.7776	69368.8	84.7779	4306.17	84.7769	756.34	86.4222	-310.086	84.779	2404.97
	85.0764	-118.374	85.0771	8967.21	85.0749	13283.3	85.0748	1517.37	85.0758	32209.3	85.0747	66167.3	85.0751	3307.75	85.0741	79.1714	86.4222	5830.54	85.0762	48.0907
	85.0764	130.283	85.0771	7655.82	85.0749	10023.3	85.0748	2294.61	85.0758	16818.4	85.0747	65118.7	85.0751	2873.77	85.0741	89.1531	86.4222	8683.09	85.0762	334.522
	85.0764	-52.948	85.0771	13640.8	85.0749	10719.8	85.0748	2075.07	85.0758	25229.7	85.0747	65894.7	85.0751	3014.58	85.0741	156.227	86.4222	597.012	85.0762	384.858
	85.0764	222.962	85.0771	9963.62	85.0749	5346.43	85.0748	2186.89	85.0758	14169.1	85.0747	50641.9	85.0751	2755.49	85.0741	294.127	86.4222	8587.7	85.0762	438.046
	85.0764	258.804	85.0771	15029.6	85.0749	16331.8	85.0748	3447.07	85.0758	26138.2	85.0747	78353.5	85.0751	4842.81	85.0741	353.855	86.7291	492.859	85.0762	438.07
	85.0764	431.408	85.0771	11782.8	85.0749	7929.5	85.0748	2887.09	85.0758	11834.7	85.0747	1047.83	85.0751	3735.42	85.0741	364.448	86.7291	-180.523	85.0762	916.635
	85.0764	-271.042	85.0771	257.215	85.0749	7828.44	85.0748	3481.45	85.0758	22715.4	85.0747	89707	85.0751	3124.59	85.0741	504.031	86.7291	664.035	85.0762	967.159
	85.0764	437.86	85.0771	-227.726	85.0749	7856.73	85.0748	2757.85	85.0758	9481.21	85.0747	65255.2	85.0751	2715.96	85.0741	506.792	86.7291	-112.504	85.0762	993.076
	85.0764	-95.6406	85.0771	11218.1	85.0749	7581.47	85.0748	2832.93	85.0758	22671.6	85.0747	75066.8	85.0751	3215.67	85.0741	540.097	86.7291	193.027	85.0762	1043.38
	85.0764	163.111	85.0771	-93.6998	85.0749	4252.44	85.0748	1280.1	85.0758	4770.02	85.0747	74530.3	85.0751	879.767	85.0741	545.012	86.7291	368.345	85.0762	1417.47
	85.0764	124.458	85.0771	11976.4	85.0749	8125.84	85.0748	3225.81	85.0758	19047.4	85.0747	124742	85.0751	2533.25	85.0741	555.063	86.7291	208.938	85.0762	1490.8
	85.0764	-128.026	85.0771	-37.8899	85.0749	6711.19	85.0748	2476.25	85.0758	17397.4	85.0747	80182.2	85.0751	2963.33	85.0741	609.23	86.7291	-198.777	85.0762	1566.47
	85.0764	-28.8673	85.0771	9046.29	85.0749	3919.18	85.0748	3243.63	85.0758	15196.5	85.0747	77950	85.0751	3279.11	85.0741	693.161	86.7291	5725.18	85.0762	2194.12
	85.3736	-126.005	85.3743	4504.21	85.3721	7395.12	85.3719	892.41	85.373	20205.5	85.3719	78037.3	85.3722	1840.45	85.3713	55.7977	86.7291	8634.48	85.3734	49.035
	85.3736	113.919	85.3743	3638.15	85.3721	5994.94	85.3719	1431.23	85.373	9460.16	85.3719	73262.1	85.3722	1647.15	85.3713	65.8105	86.7291	424.223	85.3734	326.473
	85.3736	-63.2234	85.3743	7012.69	85.3721	6300.61	85.3719	1258.4	85.373	15305.2	85.3719	75816.9	85.3722	1738.75	85.3713	124.185	86.7291	8471.45	85.3734	354.757
	85.3736	208.413	85.3743	5387.38	85.3721	2941.48	85.3719	2103.62	85.373	9408.55	85.3719	58049.8	85.3722	2139.56	85.3713	266.135	87.036	365.492	85.3734	416.427
	85.3736	251.307	85.3743	8097.98	85.3721	9554.68	85.3719	2833.36	85.373	15938.6	85.3719	89386.1	85.3722	3023.94	85.3713	325.598	87.036	-307.035	85.3734	420.964
	85.3736	419.264	85.3743	6232.62	85.3721	4679.4	85.3719	2749.15	85.373	6135.02	85.3719	1036.54	85.3722	3366.56	85.3713	387.786	87.036	658.949	85.3734	875.812
	85.3736	-281.818	85.3743	74.291	85.3721	4526.86	85.3719	3218.15	85.373	13398.8	85.3719	99083.7	85.3722	1955.73	85.3713	465.474	87.036	-15.4603	85.3734	939.461
	85.3736	416.605	85.3743	-307.57	85.3721	4507.43	85.3719	2565.51	85.373	5380.58	85.3719	71616.2	85.3722	2545.26	85.3713	474.017	87.036	134.441	85.3734	963.695
	85.3736	-110.924	85.3743	5804.01	85.3721	4299.19	85.3719	1813.52	85.373	13011.9	85.3719	81415.8	85.3722	2094.23	85.3713	497.186	87.036	308.01	85.3734	1008.2
	85.3736	-12.1168	85.3743	-55.7464	85.3721	2560.11	85.3719	1179.57	85.373	2788.8	85.3719	80570.9	85.3722	926.508	85.3713	531.822	87.036	188.914	85.3734	1355.25
	85.3736	111.451	85.3743	6157.28	85.3721	4530.05	85.3719	2799.79	85.373	10585.4	85.3719	129506	85.3722	1939.45	85.3713	539.131	87.036	-89.6589	85.3734	1373.33
	85.3736	-134.914	85.3743	-119.496	85.3721	3998.96	85.3719	2230.27	85.373	9450.27	85.3719	82839.2	85.3722	2516.11	85.3713	572.134	87.036	5679.05	85.3734	1511.99
	85.3736	-40.5189	85.3743	4857.02	85.3721	2216.26	85.3719	2893.37	85.373	8427.48	85.3719	82357.9	85.3722	2737.34	85.3713	656.254	87.036	8643.55	85.3734	2084.36
	85.6708	-127.433	85.6715	2095.29	85.6693	4073.54	85.6691	554.407	85.6702	11217.6	85.6691	86445.6	85.6694	1031.25	85.6684	47.2996	87.036	343.57	85.6705	77.5291
	85.6708	105.067	85.6715	1547.88	85.6693	3633.33	85.6691	1018.74	85.6702	5258.95	85.6691	77529.1	85.6694	1012.1	85.6684	53.7065	87.036	8373.6	85.6705	322.463
	85.6708	-69.434	85.6715	3307.39	85.6693	3694.62	85.6691	819.245	85.6702	8582.12	85.6691	81977.2	85.6694	1042.64	85.6684	118.706	87.3429	304.516	85.6705	331.83
	85.6708	200.708	85.6715	2629.98	85.6693	1537.73	85.6691	2063.11	85.6702	5899.84	85.6691	62097.8	85.6694	1827.66	85.6684	242.365	87.3429	-351.844	85.6705	410.461
	85.6708	249.954	85.6715	4095.31	85.6693	5582.84	85.6691	2541.12	85.6702	9165.41	85.6691	95653.5	85.6694	2034.69	85.6684	319.767	87.3429	671.129	85.6705	414.238
	85.6708	413.75	85.6715	2977.4	85.6693	2745.93	85.6691	2684.17	85.6702	3833.97	85.6691	1032.75	85.6694	3189.97	85.6684	418.73	87.3429	117.307	85.6705	863.49
	85.6708	-283.604	85.6715	-66.6891	85.6693	2666.82	85.6691	3072.55	85.6702	7813.16	85.6691	102503	85.6694	1320.17	85.6684	441.939	87.3429	80.6992	85.6705	931.252
	85.6708	409.512	85.6715	-324.714	85.6693	2586.87	85.6691	2483.53	85.6702	3062.99	85.6691	73445.7	85.6694	2468.69	85.6684	453.28	87.3429	211.691	85.6705	949.798
	85.6708	-115.865	85.6715	2746.46	85.6693	2468.75	85.6691	1186.19	85.6702	7640.5	85.6691	82735.7	85.6694	1461.66	85.6684	468.434	87.3429	217.934	85.6705	998.681
	85.6708	-112.725	85.6715	7.69934	85.6693	1611.39	85.6691	1077.86	85.6702	1538.68	85.6691	81128.2	85.6694	1017.65	85.6684	524.693	87.3429	-1.30698	85.6705	1127.25
	85.6708	105.363	85.6715	2865.9	85.6693	2479.22	85.6691	2564.99	85.6702	6274.15	85.6691	125384	85.6694	1622.34	85.6684	534.908	87.3429	5669.45	85.6705	1327.36
	85.6708	-137.359	85.6715	-227.7	85.6693	2496.23	85.6691	2091.64	85.6702	5607.25	85.6691	79774.9	85.6694	2263.5	85.6684	554.1	87.3429	8679.48	85.6705	1488.74
	85.6708	-47.4043	85.6715	2503.87	85.6693	1248.93	85.6691	2692.96	85.6702	4877.33	85.6691	81344.7	85.6694	2468.14	85.6684	630.937	87.3429	309.926	85.6705	2026.03
	85.968	-126.795	85.9688	929.463	85.9664	2212.23	85.9663	358.869	85.9673	6746.85	85.9662	89486.4	85.9666	645.902	85.9656	48.0151	87.3429	8283.25	85.9677	117.942
	85.968	99.3341	85.9688	573.66	85.9664	2396.46	85.9663	852.457	85.9673	2940.24	85.9662	76717.5	85.9666	720.788	85.9656	48.267	87.6497	270.461	85.9677	314.366
	85.968	-74.1556	85.9688	1450.35	85.9664	2292.74	85.9663	597.523	85.9673	5029.6	85.9662	82902.8	85.9666	704.961	85.9656	130.426	87.6497	-339.953	85.9677	320.24
	85.968	196.253	85.9688	1133.13	85.9664	800.996	85.9663	2035.81	85.9673	3733.09	85.9662	61611.9	85.9666	1695.4	85.9656	222.118	87.6497	653.16	85.9677	401.166
	85.968	251.071	85.9688	2002	85.9664	3303.67	85.9663	2423.94	85.9673	5684.89	85.9662	95569.4	85.9666	1542.21	85.9656	324.244	87.6497	245.387	85.9677	424.453
	85.968	410.795	85.9688	1265.12	85.9664	1712.29	85.9663	2654.16	85.9673	2526.04	85.9662	1025.82	85.9666	3109.04	85.9656	430.889	87.6497	26.4023	85.9677	857.423
	85.968	-282.104	85.9688	-134.715	85.9664	1693.89	85.9663	2982.28	85.9673	4646.79	85.9662	98875.4	85.9666	1001.1	85.9656	433.895	87.6497	120.177	85.9677	868.305
	85.968	408.717	85.9688	-295.792	85.9664	1597.94	85.9663	2458.86	85.9673	1697.24	85.9662	69962.3	85.9666	2441.86	85.9656	441.814	87.6497	260.949	85.9677	933.174
	85.968	-116.785	85.9688	1163.98	85.9664	1552.54	85.9663	821.999	85.9673	4422.98	85.9662	78480.4	85.9666	1116.27	85.9656	448.812	87.6497	70.6092	85.9677	945.321
	85.968	-111.098	85.9688	83.1359	85.9664	1123.98	85.9663	986.296	85.9673	817.975	85.9662	75744	85.9666	1114.2	85.9656	517.817	87.6497	5686.75	85.9677	1004.36
	85.968	101.197	85.9688	1169.84	85.9664	1432.19	85.9663	2431.24	85.9673	3600.5	85.9662	112857	85.9666	1453.66	85.9656	536.901	87.6497	8718.06	85.9677	1321.49
	85.968	-138.072	85.9688	-337.598	85.9664	1738.82	85.9663	2015.6	85.9673	3263.62	85.9662	71353.2	85.9666	2112.78	85.9656	542.667	87.6497	308.906	85.9677	1475.6
	85.968	-52.5697	85.9688	1288.26	85.9664	759.911	85.9663	2580.45	85.9673	2751.06	85.9662	74729	85.9666	2343.65	85.9656	610.598	87.6497	8214.85	85.9677	1993.56
	86.2653	-126.149	86.266	425.875	86.2636	1277.95	86.2634	235.959	86.2645	4054.42	86.2634	86181.9	86.2638	514.595	86.2627	44.833	87.9566	254.707	86.2649	157.151
	86.2653	95.9639	86.266	164.201	86.2636	1823.42	86.2634	807.645	86.2645	1648.17	86.2634	70596.7	86.2638	611.307	86.2627	54.6241	87.9566	-289.164	86.2649	301.29
	86.2653	-77.4625	86.266	626.746	86.2636	1598.04	86.2634	507.496	86.2645	2896.83	86.2634	78073.5	86.2638	573.224	86.2627	151.672	87.9566	594.539	86.2649	319.966
	86.2653	194.028	86.266	403.68	86.2636	461.585	86.2634	2011.2	86.2645	2268.26	86.2634	56361.2	86.2638	1665.61	86.2627	208.612	87.9566	324.148	86.2649	391.388
	86.2653	252.953	86.266	1015.77	86.2636	2080.92	86.2634	2389.86	86.2645	3570.33	86.2634	88753.8	86.2638	1311.67	86.2627	328.564	87.9566	-22.2383	86.2649	439.296
	86.2653	409.223	86.266	467.713	86.2636	1215.09	86.2634	2640.92	86.2645	1863.85	86.2634	1005.52	86.2638	3065.66	86.2627	416.637	87.9566	60.4207	86.2649	617.579
	86.2653	-280.249	86.266	-131.874	86.2636	1199.42	86.2634	2919.66	86.2645	2777.81	86.2634	88528.6	86.2638	858.48	86.2627	430.894	87.9566	292.695	86.2649	882.113
	86.2653	410.433	86.266	-247.794	86.2636	1138.46	86.2634	2460.62	86.2645	959.346	86.2634	61544.4	86.2638	2437.94	86.2627	436.797	87.9566	136.911	86.2649	939.419
	86.2653	-116.774	86.266	409.613	86.2636	1140.06	86.2634	633.584	86.2645	2580.57	86.2634	69215.1	86.2638	929.206	86.2627	437.262	87.9566	5719.38	86.2649	946.325
	86.2653	-5.03461	86.266	159.913	86.2636	889.34	86.2634	926.669	86.2645	434.741	86.2634	65243.9	86.2638	1172.19	86.2627	509.722	87.9566	8742.24	86.2649	1016.2
	86.2653	97.4734	86.266	380.078	86.2636	966.166	86.2634	2353.59	86.2645	2091.88	86.2634	94069	86.2638	1365.69	86.2627	531.213	87.9566	329.883	86.2649	1334.95
	86.2653	-138.235	86.266	-428.103	86.2636	1389.44	86.2634	1981.33	86.2645	1951.01	86.2634	59031.9	86.2638	2019.62	86.2627	541.054	87.9566	8180.91	86.2649	1463.87
	86.2653	-56.4309	86.266	706.723	86.2636	558.033	86.2634	2525	86.2645	1614.63	86.2634	63516	86.2638	2298.45	86.2627	593.415	88.2635	257.766	86.2649	1975.2
	86.5625	-126.596	86.5632	226.988	86.5608	860.21	86.5606	163.188	86.5617	2527.09	86.5605	76901.9	86.5609	520.708	86.5599	39.5154	88.2635	-223.461	86.5621	186.5
	86.5625	95.1331	86.5632	0.957031	86.5608	1590.42	86.5606	812.926	86.5617	991.495	86.5605	60086.3	86.5609	585.44	86.5599	62.4436	88.2635	506.637	86.5621	292.381
	86.5625	-79.0129	86.5632	308.266	86.5608	1270.76	86.5606	504.125	86.5617	1745.09	86.5605	68179.5	86.5609	546.666	86.5599	175.873	88.2635	323.852	86.5621	322.356
	86.5625	193.556	86.5632	89.791	86.5608	336.072	86.5606	1989.8	86.5617	1359.48	86.5605	47222.9	86.5609	1690.19	86.5599	205.23	88.2635	-62.7812	86.5621	381.422
	86.5625	254.624	86.5632	601.16	86.5608	1451.14	86.5606	2386.23	86.5617	2369.38	86.5605	76254.7	86.5609	1200.52	86.5599	326.569	88.2635	37.6555	86.5621	450.324
	86.5625	408.846	86.5632	152.516	86.5608	998.865	86.5606	2637	86.5617	1560.68	86.5605	966.314	86.5609	3030.02	86.5599	366.022	88.2635	296.379	86.5621	452.028
	86.5625	-279.898	86.5632	-90.7658	86.5608	935.843	86.5606	2876.32	86.5617	1751.75	86.5605	73197.8	86.5609	805.374	86.5599	434.225	88.2635	195.988	86.5621	898.416
	86.5625	412.608	86.5632	-203.775	86.5608	938.001	86.5606	2470.43	86.5617	589.286	86.5605	49672.7	86.5609	2440.41	86.5599	435.432	88.2635	5751.2	86.5621	946.542
	86.5625	-117.366	86.5632	78.1719	86.5608	967.708	86.5606	560.11	86.5617	1634.34	86.5605	56497.3	86.5609	825.57	86.5599	439.701	88.2635	8747.63	86.5621	949.705
	86.5625	179.362	86.5632	229.138	86.5608	784.098	86.5606	916.231	86.5617	246.762	86.5605	51509.8	86.5609	1160.68	86.5599	501.271	88.2635	358.926	86.5621	1027.29
	86.5625	94.1261	86.5632	63.4141	86.5608	795.394	86.5606	2312.13	86.5617	1318.93	86.5605	72195.6	86.5609	1327.1	86.5599	517.918	88.2635	8182.11	86.5621	1354.62
	86.5625	-138.551	86.5632	-489.806	86.5608	1238.99	86.5606	1977.25	86.5617	1256.02	86.5605	44915.9	86.5609	1964.44	86.5599	544.427	88.5703	277.387	86.5621	1452.38
	86.5625	-58.6744	86.5632	453.039	86.5608	515.574	86.5606	2502.04	86.5617	1069.99	86.5605	49619.7	86.5609	2300.67	86.5599	579.936	88.5703	-168.18	86.5621	1965.63
	86.8597	-128.518	86.8605	141.002	86.8579	688.68	86.8578	138.869	86.8589	1710.48	86.8577	63322.8	86.8581	586.434	86.857	28.4153	88.5703	409.617	86.8593	201.447
	86.8597	96.5667	86.8605	-71.668	86.8579	1502.79	86.8578	830.489	86.8589	659.307	86.8577	47020.6	86.8581	586.709	86.857	68.1416	88.5703	242.211	86.8593	288.83
	86.8597	-79.0033	86.8605	196.281	86.8579	1110.49	86.8578	556.016	86.8589	1193.62	86.8577	54967.8	86.8581	558.947	86.857	197.785	88.5703	-97.3906	86.8593	327.296
	86.8597	194.427	86.8605	-22.3223	86.8579	314.931	86.8578	1975.89	86.8589	844.279	86.8577	35920.9	86.8581	1737.47	86.857	212.63	88.5703	38.6222	86.8593	372.342
	86.8597	255.43	86.8605	445.352	86.8579	1127.93	86.8578	2386.35	86.8589	1714.26	86.8577	60278.1	86.8581	1136.89	86.857	297.769	88.5703	267.676	86.8593	375.301
	86.8597	409.487	86.8605	61.8359	86.8579	914.272	86.8578	2639.19	86.8589	1425.4	86.8577	910.052	86.8581	2992.83	86.857	318.098	88.5703	229.621	86.8593	451.214
	86.8597	-282.133	86.8605	-53.4529	86.8579	780.621	86.8578	2850.9	86.8589	1215.91	86.8577	55525.5	86.8581	787.462	86.857	435.838	88.5703	5765.46	86.8593	912.49
	86.8597	413.994	86.8605	-175.043	86.8579	841.522	86.8578	2476.81	86.8589	414.739	86.8577	36464.2	86.8581	2440.06	86.857	440.009	88.5703	8743.11	86.8593	953.141
	86.8597	-118.919	86.8605	-55.4062	86.8579	890.419	86.8578	557.979	86.8589	1199.26	86.8577	42433.8	86.8581	766.918	86.857	454.05	88.5703	381.406	86.8593	953.248
	86.8597	395.271	86.8605	283.611	86.8579	746.837	86.8578	953.086	86.8589	164.946	86.8577	36893	86.8581	1076.54	86.857	494.156	88.5703	8209	86.8593	1033.93
	86.8597	91.5638	86.8605	-23.4805	86.8579	748.281	86.8578	2294.66	86.8589	957.416	86.8577	50541.6	86.8581	1322.47	86.857	504.348	88.8772	303.754	86.8593	1373.84
	86.8597	-139.456	86.8605	-522.74	86.8579	1174.07	86.8578	1991.35	86.8589	886.375	86.8577	31142.4	86.8581	1935.7	86.857	545.144	88.8772	-140.148	86.8593	1443.27
	86.8597	-59.0704	86.8605	361.777	86.8579	547.905	86.8578	2485.35	86.8589	817.425	86.8577	35283.6	86.8581	2330.73	86.857	571.18	88.8772	321.336	86.8593	1962.15
	87.1569	-131.552	87.1577	81.123	87.1551	613.564	87.1549	161.035	87.1561	1275.55	87.1549	47899.6	87.1553	661.543	87.1542	11.1251	88.8772	102.151	87.1564	199.832
	87.1569	99.2296	87.1577	-110.738	87.1551	1461.56	87.1549	843.626	87.1561	457.506	87.1549	33571.3	87.1553	585.988	87.1542	69.3057	88.8772	-126.641	87.1564	292.763
	87.1569	-78.2545	87.1577	147.746	87.1551	1016.25	87.1549	632.043	87.1561	965.866	87.1549	40703	87.1553	569.038	87.1542	213.78	88.8772	40.9208	87.1564	333.4
	87.1569	196.319	87.1577	-46.0879	87.1551	338.828	87.1549	1972.45	87.1561	577.009	87.1549	24440.9	87.1553	1786.01	87.1542	227.379	88.8772	215.637	87.1564	364.724
	87.1569	255.02	87.1577	387.359	87.1551	957.597	87.1549	2377.15	87.1561	1358.48	87.1549	43505.1	87.1553	1091.95	87.1542	235.949	88.8772	214.503	87.1564	378.251
	87.1569	410.66	87.1577	59.4902	87.1551	887.549	87.1549	2644.28	87.1561	1355.37	87.1549	844.457	87.1553	2957.38	87.1542	307.286	88.8772	5751.42	87.1564	440.782
	87.1569	-286.983	87.1577	-45.0309	87.1551	685.855	87.1549	2841.34	87.1561	939.107	87.1549	38261.2	87.1553	773.488	87.1542	437.503	88.8772	8743.17	87.1564	921.753
	87.1569	413.925	87.1577	-161.455	87.1551	774.902	87.1549	2472.91	87.1561	338.958	87.1549	23994.7	87.1553	2433.56	87.1542	453.403	88.8772	386.574	87.1564	955.797
	87.1569	-120.812	87.1577	-106.449	87.1551	839.737	87.1549	595.093	87.1561	1013.3	87.1549	29074.4	87.1553	736.231	87.1542	470.475	88.8772	8248.05	87.1564	959.018
	87.1569	590.693	87.1577	318.401	87.1551	747.3	87.1549	1011.73	87.1561	137.857	87.1549	23515.6	87.1553	947.214	87.1542	489.739	89.1841	321.227	87.1564	1035.49
	87.1569	90.3123	87.1577	-10.1445	87.1551	734.756	87.1549	2288.58	87.1561	792.144	87.1549	31704.9	87.1553	1339.69	87.1542	493.216	89.1841	-142.559	87.1564	1390.15
	87.1569	-141.042	87.1577	-529.005	87.1551	1140.96	87.1549	2009.29	87.1561	672.831	87.1549	19335.6	87.1553	1924	87.1542	542.398	89.1841	252.051	87.1564	1438.64
	87.1569	-57.6812	87.1577	347.895	87.1551	598.228	87.1549	2454.8	87.1561	671.86	87.1549	22437.9	87.1553	2372.37	87.1542	567.468	89.1841	-61.8542	87.1564	1963.05
	87.4541	-134.684	87.4549	20.3359	87.4523	570.307	87.4521	215.444	87.4533	1023.99	87.452	33083.9	87.4525	715.777	87.4514	-9.13708	89.1841	-145.871	87.4536	181.422
	87.4541	101.753	87.4549	-120.422	87.4523	1427.79	87.4521	847.993	87.4533	300.882	87.452	21589.5	87.4525	572.905	87.4514	65.845	89.1841	22.2162	87.4536	305.713
	87.4541	-77.7542	87.4549	112.609	87.4523	947.736	87.4521	700.293	87.4533	888.559	87.452	27477.5	87.4525	558.205	87.4514	200.846	89.1841	157.789	87.4536	338.588
	87.4541	198.9	87.4549	-35.2109	87.4523	376.223	87.4521	1978.89	87.4533	449.325	87.452	14401.7	87.4525	1822.34	87.4514	222.061	89.1841	137.044	87.4536	357.889
	87.4541	253.444	87.4549	356.219	87.4523	865.352	87.4521	2350.38	87.4533	1162.93	87.452	28294.2	87.4525	1054.86	87.4514	242.932	89.1841	5709.22	87.4536	423.838
	87.4541	411.702	87.4549	80.9863	87.4523	885.017	87.4521	2647.72	87.4533	1308.57	87.452	778.725	87.4525	2930.59	87.4514	298.574	89.1841	8756.2	87.4536	438.705
	87.4541	-293.283	87.4549	-58.8112	87.4523	636.435	87.4521	2842.07	87.4533	789.45	87.452	23505.9	87.4525	752.821	87.4514	440.838	89.1841	370.062	87.4536	925.563
	87.4541	412.347	87.4549	-155.83	87.4523	712.455	87.4521	2455.55	87.4533	314.087	87.452	13720.6	87.4525	2421.73	87.4514	470.764	89.1841	8286.32	87.4536	956.961
	87.4541	-121.99	87.4549	-131.809	87.4523	789.012	87.4521	646.832	87.4533	924.79	87.452	17890.7	87.4525	724.649	87.4514	486.06	89.491	314.82	87.4536	963.801
	87.4541	707.746	87.4549	331	87.4523	765.13	87.4521	1052.18	87.4533	134.806	87.452	13037.6	87.4525	818.748	87.4514	486.501	89.491	-167.25	87.4536	1033.17
	87.4541	90.8042	87.4549	33.9531	87.4523	717.914	87.4521	2282.64	87.4533	696.149	87.452	17091.9	87.4525	1365.85	87.4514	488.296	89.491	205.844	87.4536	1401.9
	87.4541	-143.054	87.4549	-509.441	87.4523	1118.24	87.4521	2018.7	87.4533	535.944	87.452	10447.6	87.4525	1923.56	87.4514	536.665	89.491	-217.29	87.4536	1438.73
	87.4541	-54.8337	87.4549	366.57	87.4523	631.86	87.4521	2407.27	87.4533	549.561	87.452	12439.2	87.4525	2411.85	87.4514	568.16	89.491	-148.703	87.4536	1966.7
	87.7513	-136.673	87.7522	-38.3574	87.7494	542.635	87.7493	275.302	87.7505	857.336	87.7492	20647.5	87.7496	733.779	87.7485	-27.2954	89.491	-32.9096	87.7508	149.503
	87.7513	103.089	87.7522	-82.9473	87.7494	1393.6	87.7493	844.148	87.7505	176.716	87.7492	12164.4	87.7496	548.617	87.7485	60.5521	89.491	111.703	87.7508	327.048
	87.7513	-78.0824	87.7522	86.6562	87.7494	895.011	87.7493	733.666	87.7505	867.322	87.7492	16676.8	87.7496	526.444	87.7485	200.057	89.491	1.11749	87.7508	340.918
	87.7513	201.595	87.7522	-13.7812	87.7494	408.103	87.7493	1991.56	87.7505	393.733	87.7492	8395.89	87.7496	1839.65	87.7485	222.873	89.491	5650.17	87.7508	350.45
	87.7513	251.138	87.7522	327.852	87.7494	814.891	87.7493	2301.14	87.7505	1060.3	87.7492	16116.6	87.7496	1017.52	87.7485	252.728	89.491	8777.3	87.7508	408.725
	87.7513	412.126	87.7522	100.158	87.7494	887.528	87.7493	2645.12	87.7505	1273.52	87.7492	719.573	87.7496	2915.94	87.7485	293.578	89.491	333.355	87.7508	529.432
	87.7513	-299.066	87.7522	-62.3793	87.7494	624.695	87.7493	2845.03	87.7505	700.08	87.7492	12426.3	87.7496	731.566	87.7485	446.256	89.491	8313.64	87.7508	924.488
	87.7513	409.801	87.7522	-148.267	87.7494	652.143	87.7493	2424.84	87.7505	315.985	87.7492	7947.67	87.7496	2407.25	87.7485	485.054	89.7978	277.93	87.7508	956.535
	87.7513	-121.721	87.7522	-157.867	87.7494	732.518	87.7493	693.876	87.7505	862.506	87.7492	9978.27	87.7496	722.008	87.7485	486.342	89.7978	-201	87.7508	966.132
	87.7513	739.948	87.7522	321.386	87.7494	782.415	87.7493	1037.89	87.7505	136.577	87.7492	8050.78	87.7496	734.222	87.7485	488.88	89.7978	184.848	87.7508	1028.67
	87.7513	93.1029	87.7522	71.3281	87.7494	691.74	87.7493	2272.81	87.7505	608.823	87.7492	10165.9	87.7496	1389.22	87.7485	498.396	89.7978	-338.851	87.7508	1405.96
	87.7513	-145.033	87.7522	-467.905	87.7494	1099.29	87.7493	2014.73	87.7505	446.092	87.7492	6267.38	87.7496	1933.79	87.7485	529.921	89.7978	-134.305	87.7508	1441.86
	87.7513	-51.0663	87.7522	393.912	87.7494	634.681	87.7493	2357.77	87.7505	437.361	87.7492	7515.58	87.7496	2439.61	87.7485	572.027	89.7978	-126.512	87.7508	1970.89
	88.0485	-136.711	88.0494	-81.6758	88.0466	532.594	88.0464	311.644	88.0477	738.125	88.0464	11378	88.0468	711.838	88.0457	-38.7855	89.7978	87.8125	88.048	111.901
	88.0485	102.913	88.0494	19.7344	88.0466	1362.21	88.0464	832.307	88.0477	100.069	88.0464	7034.69	88.0468	519.005	88.0457	57.9384	89.7978	-171.8	88.048	338.985
	88.0485	-79.1304	88.0494	77.832	88.0466	858.024	88.0464	716.784	88.0477	857.03	88.0464	9247.74	88.0468	484.18	88.0457	218.388	89.7978	5591.58	88.048	341.857
	88.0485	203.51	88.0494	6.44336	88.0466	422.097	88.0464	2005.74	88.0477	373.469	88.0464	4955.83	88.0468	1836.21	88.0457	226.794	89.7978	8791.3	88.048	353.455
	88.0485	248.774	88.0494	298.77	88.0466	787.57	88.0464	2232.41	88.0477	1018.72	88.0464	8787.04	88.0468	971.429	88.0457	253.584	89.7978	281.645	88.048	402.695
	88.0485	411.884	88.0494	110.871	88.0466	880.384	88.0464	2635.2	88.0477	1247.95	88.0464	669.9	88.0468	2911.17	88.0457	291.07	89.7978	8323.85	88.048	622.241
	88.0485	-302.464	88.0494	-19.6089	88.0466	639.961	88.0464	2842.21	88.0477	640.41	88.0464	7397.34	88.0468	723.109	88.0457	453.345	90.1047	216.707	88.048	919.577
	88.0485	407.215	88.0494	-129.469	88.0466	598.31	88.0464	2384.22	88.0477	328.65	88.0464	4705.82	88.0468	2393	88.0457	489.418	90.1047	-231.02	88.048	954.236
	88.0485	-120.101	88.0494	-192.078	88.0466	675.591	88.0464	722.817	88.0477	804.48	88.0464	5884.71	88.0468	714.842	88.0457	489.878	90.1047	190.895	88.048	964.304
	88.0485	732.03	88.0494	293.269	88.0466	785.544	88.0464	954.728	88.0477	133.582	88.0464	4879.01	88.0468	714.859	88.0457	494.122	90.1047	-407.96	88.048	1023.57
	88.0485	96.6434	88.0494	84.6406	88.0466	663.502	88.0464	2264.26	88.0477	517.126	88.0464	6050.14	88.0468	1403.06	88.0457	505.01	90.1047	-110.789	88.048	1398.51
	88.0485	-146.56	88.0494	-416.317	88.0466	1082.17	88.0464	2001.47	88.0477	393.921	88.0464	3684.76	88.0468	1956.17	88.0457	525.091	90.1047	-241.491	88.048	1445.38
	88.0485	-47.0752	88.0494	419.689	88.0466	610.017	88.0464	2328.43	88.0477	354.447	88.0464	4375.43	88.0468	2451.15	88.0457	577.754	90.1047	87.1367	88.048	1972.55
	88.3457	-134.947	88.3466	-99.4043	88.3438	542.021	88.3436	307.638	88.3448	657.955	88.3435	6684.1	88.344	655.77	88.3428	-41.0908	90.1047	-347.078	88.3451	78.7449
	88.3457	101.547	88.3466	193.018	88.3438	1337.51	88.3436	810.984	88.3448	79.9053	88.3435	4006.43	88.344	490.663	88.3428	61.2834	90.1047	5549.12	88.3451	331.999
	88.3457	-80.2644	88.3466	86.4922	88.3438	835.778	88.3436	651.223	88.3448	837.24	88.3435	5419.14	88.344	441.313	88.3428	211.899	90.1047	8784.11	88.3451	333.575
	88.3457	203.661	88.3466	19.3027	88.3438	413.461	88.3436	2017.6	88.3448	367.924	88.3435	2820.21	88.344	1813.5	88.3428	247.207	90.1047	221.73	88.3451	379.868
	88.3457	246.982	88.3466	271.914	88.3438	775.164	88.3436	2158.23	88.3448	1015.79	88.3435	4957.83	88.344	913.017	88.3428	264.781	90.1047	8316.62	88.3451	407.811
	88.3457	411.34	88.3466	117.189	88.3438	855.455	88.3436	2621.62	88.3448	1228.67	88.3435	629.974	88.344	2910.62	88.3428	289.413	90.4116	147.965	88.3451	692.032
	88.3457	-302.671	88.3466	85.9922	88.3438	667.31	88.3436	2828.42	88.3448	597.317	88.3435	4327.98	88.344	735.92	88.3428	460.635	90.4116	-247.98	88.3451	911.906
	88.3457	405.54	88.3466	-94.3269	88.3438	552.205	88.3436	2340.36	88.3448	338.896	88.3435	2808.45	88.344	2381.52	88.3428	489.912	90.4116	222.531	88.3451	949.974
	88.3457	-117.972	88.3466	-227.84	88.3438	629.189	88.3436	728.761	88.3448	752.889	88.3435	3398.45	88.344	692.26	88.3428	490.428	90.4116	-414.269	88.3451	957.823
	88.3457	697.708	88.3466	255.87	88.3438	768.943	88.3436	822.324	88.3448	125.757	88.3435	3089.07	88.344	755.056	88.3428	500.311	90.4116	-91.0312	88.3451	1019.12
	88.3457	100.235	88.3466	71.2227	88.3438	640.838	88.3436	2265.7	88.3448	435.679	88.3435	3678.09	88.344	1406.67	88.3428	503.328	90.4116	-342.776	88.3451	1378.14
	88.3457	-147.44	88.3466	-370.867	88.3438	1065.42	88.3436	1987.82	88.3448	374.466	88.3435	2240.6	88.344	1988.36	88.3428	524.496	90.4116	103.898	88.3451	1446.88
	88.3457	-43.5914	88.3466	443.826	88.3438	572.111	88.3436	2333.74	88.3448	318.324	88.3435	2556.81	88.344	2446.94	88.3428	584.263	90.4116	-486.362	88.3451	1968.79
	88.6429	-132.47	88.6439	-91.9062	88.6409	565.205	88.6407	267.337	88.642	616.791	88.6407	3926.56	88.6412	578.489	88.64	-34.3147	90.4116	5530.84	88.6423	57.5785
	88.6429	99.5748	88.6439	426.559	88.6409	1321.41	88.6407	779.508	88.642	106.237	88.6407	2286.5	88.6412	470.429	88.64	69.7968	90.4116	8753.34	88.6423	320.103
	88.6429	-80.7898	88.6439	100.266	88.6409	824.728	88.6407	556.109	88.642	797.477	88.6407	3119.86	88.6412	399.72	88.64	206.228	90.4116	161.055	88.6423	328.738
	88.6429	201.414	88.6439	23.4609	88.6409	386.655	88.6407	2025.11	88.642	362.446	88.6407	1605.61	88.6412	1774.74	88.64	238.885	90.4116	8298.66	88.6423	401.245
	88.6429	246.099	88.6439	250.227	88.6409	775.752	88.6407	2099.39	88.642	1027.38	88.6407	2744.89	88.6412	849.318	88.64	288.734	90.7184	91.4258	88.6423	419.941
	88.6429	410.988	88.6439	126.379	88.6409	815.988	88.6407	2611.48	88.642	1209.51	88.6407	599.069	88.6412	2909.19	88.64	296.247	90.7184	-247.637	88.6423	722.769
	88.6429	-300.348	88.6439	240.05	88.6409	690.711	88.6407	2803.21	88.642	564.962	88.6407	2642.02	88.6412	765.757	88.64	466.067	90.7184	270.746	88.6423	902.45
	88.6429	405.357	88.6439	-45.952	88.6409	511.065	88.6407	2301.81	88.642	337.507	88.6407	1798.7	88.6412	2375.17	88.64	475.816	90.7184	-361.549	88.6423	944.267
	88.6429	-116.357	88.6439	-250.473	88.6409	604.262	88.6407	716.33	88.642	716.392	88.6407	2025.89	88.6412	654.214	88.64	488.586	90.7184	-84.5938	88.6423	948.431
	88.6429	630.875	88.6439	222.87	88.6409	735.811	88.6407	689.843	88.642	119.561	88.6407	2203	88.6412	831.622	88.64	491.847	90.7184	-391.631	88.6423	1016.17
	88.6429	102.463	88.6439	38.2891	88.6409	625.102	88.6407	2280.22	88.642	384.624	88.6407	2408.47	88.6412	1402.71	88.64	517.737	90.7184	129.789	88.6423	1348.53
	88.6429	-147.728	88.6439	-339.141	88.6409	1048.62	88.6407	1981.02	88.642	380.887	88.6407	1506.6	88.6412	2021.05	88.64	528.226	90.7184	-562.579	88.6423	1445.25
	88.6429	-41.1556	88.6439	472.211	88.6409	537.438	88.6407	2372.65	88.642	325.78	88.6407	1585.06	88.6412	2431.14	88.64	590.801	90.7184	5535.49	88.6423	1958.69
	88.9401	-130.706	88.9411	-71.0195	88.9381	589.965	88.9379	212.499	88.9392	612.443	88.9378	2406.07	88.9384	496.288	88.9371	-21.3143	90.7184	8709.79	88.9395	49.7654
	88.9401	97.5209	88.9411	698.676	88.9381	1315.11	88.9379	741.153	88.9392	155.666	88.9378	1412.48	88.9384	465.332	88.9371	78.45	90.7184	107.426	88.9395	304.961
	88.9401	-80.391	88.9411	100.125	88.9381	822.123	88.9379	461.55	88.9392	732.288	88.9378	1839.4	88.9384	353.757	88.9371	202.033	90.7184	8281.92	88.9395	330.338
	88.9401	196.9	88.9411	22.2227	88.9381	352.144	88.9379	2027.7	88.9392	345.839	88.9378	964.852	88.9384	1724.4	88.9371	234.146	91.0253	60.9102	88.9395	414.144
	88.9401	246.051	88.9411	234.605	88.9381	787.125	88.9379	2072.21	88.9392	1029.95	88.9378	1588.51	88.9384	796.612	88.9371	290.831	91.0253	-231.934	88.9395	431.35
	88.9401	411.122	88.9411	142.975	88.9381	775.789	88.9379	2611.08	88.9392	1182.63	88.9378	576.05	88.9384	2904.7	88.9371	309.147	91.0253	318.867	88.9395	713.693
	88.9401	-297.171	88.9411	402.747	88.9381	697.976	88.9379	2771.62	88.9392	540.799	88.9378	1808.32	88.9384	796.716	88.9371	455.144	91.0253	-271.952	88.9395	892.046
	88.9401	406.62	88.9411	1.97131	88.9381	473.309	88.9379	2275.94	88.9392	321.713	88.9378	1300.73	88.9384	2375.95	88.9371	467.853	91.0253	-92.8867	88.9395	938.231
	88.9401	-115.892	88.9411	-246.539	88.9381	605.764	88.9379	695.722	88.9392	698.744	88.9378	1329.71	88.9384	613.945	88.9371	471.822	91.0253	-368.37	88.9395	939.423
	88.9401	563.598	88.9411	206.168	88.9381	694.614	88.9379	614.58	88.9392	121.943	88.9378	1826.35	88.9384	917.766	88.9371	486.648	91.0253	156.84	88.9395	1014.74
	88.9401	102.346	88.9411	-2.88281	88.9381	611.643	88.9379	2300.83	88.9392	371.767	88.9378	1759.21	88.9384	1392.94	88.9371	533.841	91.0253	-573.917	88.9395	1318.16
	88.9401	-147.596	88.9411	-309.627	88.9381	1034.82	88.9379	1982.76	88.9392	403.208	88.9378	1166.25	88.9384	2041.19	88.9371	539.384	91.0253	5555	88.9395	1441.04
	88.9401	-39.8959	88.9411	510.996	88.9381	516.667	88.9379	2430.94	88.9392	353.678	88.9378	1089.98	88.9384	2408.75	88.9371	596.872	91.0253	8669.26	88.9395	1944.43
	89.2373	-130.586	89.2383	-54.5488	89.2353	602.874	89.2351	168.7	89.2364	637.623	89.235	1631.98	89.2355	424.026	89.2343	-7.31165	91.0253	68.4062	89.2367	51.4221
	89.2373	95.7881	89.2383	982.84	89.2353	1320.23	89.2351	702.987	89.2364	203.938	89.235	1026.27	89.2355	479.449	89.2343	81.1033	91.0253	8277.81	89.2367	289.814
	89.2373	-79.291	89.2383	71.3008	89.2353	829.144	89.2351	395.316	89.2364	643.051	89.235	1162.02	89.2355	297.56	89.2343	197.083	91.3322	59.3164	89.2367	339.144
	89.2373	191.197	89.2383	20.8281	89.2353	318.949	89.2351	2025.4	89.2364	312.862	89.235	652.385	89.2355	1668.21	89.2343	235.395	91.3322	-208.449	89.2367	417.294
	89.2373	246.436	89.2383	224.039	89.2353	800.129	89.2351	2079.03	89.2364	1009.17	89.235	1035.39	89.2355	770.814	89.2343	297.014	91.3322	348.863	89.2367	435.202
	89.2373	411.683	89.2383	165.621	89.2353	750.664	89.2351	2621.44	89.2364	1140.19	89.235	558.764	89.2355	2897.61	89.2343	300.984	91.3322	-181.358	89.2367	680.886
	89.2373	-294.819	89.2383	526.692	89.2353	685.67	89.2351	2742.92	89.2364	524.948	89.235	1435.57	89.2355	810.003	89.2343	435.667	91.3322	-110.934	89.2367	881.421
	89.2373	408.632	89.2383	27.6007	89.2353	443.325	89.2351	2265.35	89.2364	295.512	89.235	1065.85	89.2355	2384.44	89.2343	447.849	91.3322	-287.115	89.2367	933
	89.2373	-116.638	89.2383	-212.895	89.2353	629.296	89.2351	674.544	89.2364	693.504	89.235	993.138	89.2355	590.123	89.2343	465.156	91.3322	178.121	89.2367	933.614
	89.2373	519.093	89.2383	207.44	89.2353	653.629	89.2351	631.349	89.2364	134.872	89.235	1690.41	89.2355	992.052	89.2343	485.466	91.3322	-544.998	89.2367	1013.81
	89.2373	99.8748	89.2383	-43.0117	89.2353	594.904	89.2351	2314.91	89.2364	386.561	89.235	1432.45	89.2355	1376.5	89.2343	537.828	91.3322	5579	89.2367	1296.63
	89.2373	-147.184	89.2383	-255.906	89.2353	1030.87	89.2351	1990.13	89.2364	430.829	89.235	1022.09	89.2355	2039.74	89.2343	560.068	91.3322	8641.96	89.2367	1436
	89.2373	-39.4905	89.2383	560.91	89.2353	510.404	89.2351	2489.29	89.2364	374.248	89.235	834.091	89.2355	2382.76	89.2343	601.982	91.3322	49.4336	89.2367	1930.58
	89.5345	-132.037	89.5356	-57.1934	89.5325	594.607	89.5322	149.145	89.5336	681.223	89.5322	1264.17	89.5327	371.133	89.5315	1.78345	91.3322	8290.18	89.5339	58.0179
	89.5345	94.7708	89.5356	1251.94	89.5325	1337.45	89.5322	671.565	89.5336	234.219	89.5322	892.439	89.5327	508.794	89.5315	74.7921	91.6391	79.6406	89.5339	278.327
	89.5345	-78.0885	89.5356	12.375	89.5325	850.19	89.5322	369.779	89.5336	541.021	89.5322	812.935	89.5327	233.353	89.5315	187.379	91.6391	-187.371	89.5339	352.731
	89.5345	186.145	89.5356	22.0938	89.5325	289.126	89.5322	2018.33	89.5336	266.566	89.5322	520.435	89.5327	1613.41	89.5315	240.503	91.6391	350.742	89.5339	411.232
	89.5345	246.743	89.5356	216.582	89.5325	798.051	89.5322	2107.53	89.5336	965.265	89.5322	783.16	89.5327	775.688	89.5315	278.398	91.6391	-125.464	89.5339	429.261
	89.5345	412.327	89.5356	188.414	89.5325	747.408	89.5322	2636.95	89.5336	1075.67	89.5322	544.582	89.5327	2889.14	89.5315	305.948	91.6391	-132.645	89.5339	651.827
	89.5345	-294.095	89.5356	578.407	89.5325	661.219	89.5322	2727	89.5336	519.609	89.5322	1280.29	89.5327	794.454	89.5315	424.02	91.6391	-188.909	89.5339	871.321
	89.5345	410.309	89.5356	9.09683	89.5325	429.529	89.5322	2266.58	89.5336	267.146	89.5322	955.188	89.5327	2398.48	89.5315	426.387	91.6391	187.961	89.5339	929.048
	89.5345	-118.295	89.5356	-160.465	89.5325	662.796	89.5322	651.129	89.5336	685.282	89.5322	818.335	89.5327	593.029	89.5315	458.314	91.6391	-510.305	89.5339	931.589
	89.5345	494.63	89.5356	214.709	89.5325	616.966	89.5322	730.484	89.5336	153.664	89.5322	1639.15	89.5327	1040.18	89.5315	486.071	91.6391	5599.26	89.5339	1011.82
	89.5345	96.0616	89.5356	-79	89.5325	573.7	89.5322	2313.79	89.5336	407.465	89.5322	1272.99	89.5327	1352.31	89.5315	537.77	91.6391	8628.2	89.5339	1289.58
	89.5345	-146.554	89.5356	-155.918	89.5325	1043.32	89.5322	1999.31	89.5336	457.761	89.5322	965.285	89.5327	2018.25	89.5315	573.322	91.6391	51.5078	89.5339	1431.86
	89.5345	-39.4127	89.5356	614.283	89.5325	510.686	89.5322	2530.96	89.5336	372.506	89.5322	689.05	89.5327	2353.8	89.5315	605.338	91.6391	8312.02	89.5339	1921.91
	89.8317	-134.12	89.8328	-82.8965	89.8296	562.34	89.8294	146.944	89.8308	730.888	89.8293	1100.04	89.8299	340.278	89.8286	2.20911	91.9459	110.266	89.831	68.5291
	89.8317	94.8816	89.8328	1480.17	89.8296	1363.48	89.8294	647.806	89.8308	237.41	89.8293	873.294	89.8299	539.627	89.8286	61.9093	91.9459	-177.129	89.831	272.74
	89.8317	-77.4203	89.8328	-62.1406	89.8296	889.121	89.8294	377.899	89.8308	446.714	89.8293	638.516	89.8299	174.537	89.8286	169.764	91.9459	328.484	89.831	366.306
	89.8317	183.685	89.8328	23.7793	89.8296	259.022	89.8294	2006.94	89.8308	217.267	89.8293	486.104	89.8299	1568.36	89.8286	244.227	91.9459	-123.247	89.831	397.744
	89.8317	246.608	89.8328	210.332	89.8296	764.51	89.8294	2139.92	89.8308	909.819	89.8293	662.68	89.8299	798.453	89.8286	253.291	91.9459	-154.371	89.831	416.821
	89.8317	412.649	89.8328	205.031	89.8296	758.09	89.8294	2648.14	89.8308	985.933	89.8293	533.356	89.8299	2879.81	89.8286	313.496	91.9459	-116.562	89.831	654.123
	89.8317	-294.723	89.8328	553.079	89.8296	639.448	89.8294	2729.73	89.8308	526.544	89.8293	1212.42	89.8299	752.715	89.8286	412.891	91.9459	183.109	89.831	862.594
	89.8317	410.657	89.8328	-64.4054	89.8296	436.562	89.8294	2272.39	89.8308	245.326	89.8293	901.003	89.8299	2413.03	89.8286	423.536	91.9459	-490.113	89.831	926.047
	89.8317	-120.525	89.8328	-110.512	89.8296	692.415	89.8294	615.558	89.8308	657.372	89.8293	698.357	89.8299	615.631	89.8286	448.756	91.9459	5612.3	89.831	931.639
	89.8317	474.621	89.8328	208.504	89.8296	584.588	89.8294	859.356	89.8308	170.04	89.8293	1596.49	89.8299	1053.81	89.8286	488.419	91.9459	8622.62	89.831	1007.88
	89.8317	92.4553	89.8328	-113.984	89.8296	552.204	89.8294	2298.41	89.8308	416.114	89.8293	1207.92	89.8299	1323.64	89.8286	533.648	91.9459	70.2031	89.831	1295.54
	89.8317	-145.767	89.8328	-13.1973	89.8296	1072.12	89.8294	2008.08	89.8308	487.039	89.8293	940.361	89.8299	1989.06	89.8286	574.482	91.9459	8329	89.831	1428.81
	89.8317	-39.3291	89.8328	656.771	89.8296	506.339	89.8294	2545.85	89.8308	353.506	89.8293	597.611	89.8299	2322.71	89.8286	605.849	92.2528	141.098	89.831	1921.36
	90.1289	-135.692	90.1301	-123.238	90.1268	509.524	90.1266	142.001	90.128	775.47	90.1265	1028.23	90.1271	329.031	90.1258	-5.3136	92.2528	-181.215	90.1282	85.3832
	90.1289	96.363	90.1301	1644.26	90.1268	1388.85	90.1266	626.209	90.128	208.782	90.1265	895.562	90.1271	554.049	90.1258	48.6407	92.2528	298.141	90.1282	272.75
	90.1289	-77.6598	90.1301	-127.754	90.1268	945.018	90.1266	401.336	90.128	382.974	90.1265	562.32	90.1271	140.771	90.1258	144.466	92.2528	-166.988	90.1282	375.049
	90.1289	184.869	90.1301	19.709	90.1268	226.324	90.1266	1992.37	90.128	177.859	90.1265	500.119	90.1271	1541.23	90.1258	237.361	92.2528	-174.344	90.1282	379.635
	90.1289	245.932	90.1301	203.547	90.1268	694.495	90.1266	2164.88	90.128	856.392	90.1265	595.703	90.1271	816.868	90.1258	241.61	92.2528	-89.9009	90.1282	404.556
	90.1289	412.407	90.1301	211.547	90.1268	763.987	90.1266	2646.92	90.128	874.422	90.1265	530.723	90.1271	2869.34	90.1258	314.842	92.2528	164.465	90.1282	703.882
	90.1289	-295.799	90.1301	474.647	90.1268	633.834	90.1266	2750	90.128	544.021	90.1265	1173.36	90.1271	700.059	90.1258	409.393	92.2528	-477.394	90.1282	856.094
	90.1289	409.277	90.1301	-184.93	90.1268	459.007	90.1266	2276.17	90.128	236.394	90.1265	872.849	90.1271	2422.05	90.1258	433.132	92.2528	5618.86	90.1282	923.435
	90.1289	-123.091	90.1301	-85.293	90.1268	708.8	90.1266	558.743	90.128	601.945	90.1265	588.335	90.1271	637.622	90.1258	438.95	92.2528	8621.77	90.1282	931.429
	90.1289	439.202	90.1301	174.123	90.1268	555.735	90.1266	948.875	90.128	178.046	90.1265	1535.87	90.1271	1030.35	90.1258	491.47	92.2528	97.457	90.1282	1002.79
	90.1289	90.3975	90.1301	-153.082	90.1268	536.023	90.1266	2276.5	90.128	408.27	90.1265	1198.55	90.1271	1300.28	90.1258	527.519	92.2528	8328.2	90.1282	1306.88
	90.1289	-144.96	90.1301	135.714	90.1268	1107.35	90.1266	2015.21	90.128	529.471	90.1265	920.928	90.1271	1968.59	90.1258	563.364	92.5597	166.855	90.1282	1425.17
	90.1289	-39.375	90.1301	673.27	90.1268	488.354	90.1266	2532.06	90.128	336.188	90.1265	541.125	90.1271	2292.77	90.1258	602.636	92.5597	-197.434	90.1282	1929.47
	90.4261	-136.136	90.4273	-162.773	90.424	444.662	90.4237	118.713	90.4252	807.45	90.4237	987.994	90.4242	333.603	90.4229	-15.886	92.5597	278.957	90.4254	110.5
	90.4261	99.0143	90.4273	1723.93	90.424	1399.8	90.4237	600.119	90.4252	147.326	90.4237	924.459	90.4242	540.561	90.4229	40.8495	92.5597	-225.359	90.4254	276.04
	90.4261	-78.7997	90.4273	-162.422	90.424	1009.89	90.4237	423.554	90.4252	363.856	90.4237	545.906	90.4242	147.673	90.4229	115.636	92.5597	-190.113	90.4254	360.656
	90.4261	189.041	90.4273	3.61719	90.424	195.879	90.4237	1976.43	90.4252	158.061	90.4237	529.458	90.4242	1537.43	90.4229	231.147	92.5597	-98.5331	90.4254	376.74
	90.4261	244.846	90.4273	194.363	90.424	600.293	90.4237	2183.26	90.4252	812.812	90.4237	553.328	90.4242	812.818	90.4229	237.359	92.5597	137.539	90.4254	398.704
	90.4261	411.634	90.4273	205.623	90.424	746.815	90.4237	2630.73	90.4252	753.765	90.4237	547.249	90.4242	2857.81	90.4229	307.361	92.5597	-445.815	90.4254	799.416
	90.4261	-296.443	90.4273	380.837	90.424	647.276	90.4237	2779.96	90.4252	566.588	90.4237	1142.32	90.4242	656.8	90.4229	414.052	92.5597	5620.79	90.4254	852.321
	90.4261	406.635	90.4273	-326.291	90.424	483.55	90.4237	2274.89	90.4252	242.941	90.4237	857.156	90.4242	2421.72	90.4229	432.204	92.5597	8627.95	90.4254	921.185
	90.4261	-125.81	90.4273	-97.7539	90.424	709.766	90.4237	483.013	90.4252	526.474	90.4237	483.062	90.4242	640.406	90.4229	448.291	92.5597	125.336	90.4254	929.973
	90.4261	373.891	90.4273	110.653	90.424	532.38	90.4237	949.589	90.4252	179.208	90.4237	1459.28	90.4242	973.428	90.4229	494.123	92.5597	8306.34	90.4254	998.817
	90.4261	90.4619	90.4273	-197.438	90.424	526.9	90.4237	2254.68	90.4252	394.76	90.4237	1215.44	90.4242	1295.53	90.4229	522.06	92.8665	186.176	90.4254	1314.41
	90.4261	-144.315	90.4273	234.096	90.424	1132.31	90.4237	2018.79	90.4252	595.233	90.4237	897.67	90.4242	1968.13	90.4229	544.7	92.8665	-219.078	90.4254	1418.46
	90.4261	-40.0792	90.4273	654.914	90.424	452.135	90.4237	2495.77	90.4252	340.404	90.4237	517.443	90.4242	2267.99	90.4229	595.709	92.8665	282.898	90.4254	1945
	90.7233	-135.674	90.7245	-187.971	90.7211	380.268	90.7209	81.5557	90.7224	824.774	90.7208	947.354	90.7214	352.811	90.7201	-23.5631	92.8665	-259.854	90.7226	141.128
	90.7233	102.083	90.7245	1701.29	90.7211	1384.82	90.7209	569.178	90.7224	59.5879	90.7208	946.62	90.7214	501.849	90.7201	40.3502	92.8665	-197.605	90.7226	279.941
	90.7233	-80.5627	90.7245	-158.812	90.7211	1069.21	90.7209	437.538	90.7224	385.278	90.7208	565.641	90.7214	197.272	90.7201	89.3401	92.8665	-113.045	90.7226	345.002
	90.7233	193.876	90.7245	-27.0723	90.7211	178.492	90.7209	1960.97	90.7224	160.869	90.7208	553.18	90.7214	1556.58	90.7201	215.622	92.8665	110.277	90.7226	372.999
	90.7233	243.581	90.7245	181.141	90.7211	507.107	90.7209	2203.85	90.7224	780.351	90.7208	526.874	90.7214	782.035	90.7201	252.63	92.8665	-371.491	90.7226	401.741
	90.7233	410.601	90.7245	184.461	90.7211	700.002	90.7209	2603.45	90.7224	644.504	90.7208	591.078	90.7214	2846.57	90.7201	292.14	92.8665	5617.67	90.7226	851.071
	90.7233	-296.181	90.7245	302.368	90.7211	669.032	90.7209	2808.28	90.7224	587.821	90.7208	1114.44	90.7214	638.309	90.7201	422.692	92.8665	8646.26	90.7226	920.051
	90.7233	403.876	90.7245	-454.223	90.7211	498.071	90.7209	2269.09	90.7224	262.933	90.7208	847.681	90.7214	2412.63	90.7201	431.706	92.8665	149.055	90.7226	922.391
	90.7233	-128.478	90.7245	-145.039	90.7211	698.211	90.7209	405.707	90.7224	451.561	90.7208	398.158	90.7214	621.345	90.7201	463.537	92.8665	8272.27	90.7226	928.243
	90.7233	275.497	90.7245	30.4135	90.7211	519.104	90.7209	855.858	90.7224	182.792	90.7208	1382.79	90.7214	892.678	90.7201	496.175	93.1734	198.219	90.7226	998.383
	90.7233	92.332	90.7245	-241.105	90.7211	520.529	90.7209	2233.41	90.7224	392.71	90.7208	1233.6	90.7214	1318.31	90.7201	519.021	93.1734	-236.871	90.7226	1312.66
	90.7233	-143.956	90.7245	231.346	90.7211	1131.37	90.7209	2016.27	90.7224	683.206	90.7208	872.293	90.7214	1987.77	90.7201	525.862	93.1734	308.781	90.7226	1407.39
	90.7233	-41.979	90.7245	603.525	90.7211	397.797	90.7209	2449.32	90.7224	376.874	90.7208	527.038	90.7214	2248.13	90.7201	586.159	93.1734	-246.456	90.7226	1965.4
	91.0205	-135.117	91.0218	-194.111	91.0183	330.904	91.0181	55.2852	91.0195	830.683	91.018	894.763	91.0186	389.744	91.0172	-25.0874	93.1734	-193.32	91.0198	169.475
	91.0205	104.468	91.0218	1561.42	91.0183	1342.36	91.0181	542.287	91.0195	-36.8359	91.018	958.54	91.0186	453.952	91.0172	44.1073	93.1734	-102.903	91.0198	282.861
	91.0205	-82.6432	91.0218	-128.688	91.0183	1105.43	91.0181	443.95	91.0195	424.47	91.018	603.902	91.0186	275.798	91.0172	70.4653	93.1734	89.1797	91.0198	336.195
	91.0205	196.519	91.0218	-69.6973	91.0183	182.796	91.0181	1947.43	91.0195	183.034	91.018	564.41	91.0186	1591.09	91.0172	200.161	93.1734	-251.196	91.0198	368.18
	91.0205	242.386	91.0218	164.059	91.0183	440.45	91.0181	2233.01	91.0195	757.89	91.018	513.008	91.0186	733.318	91.0172	273.144	93.1734	5606.46	91.0198	411.31
	91.0205	409.659	91.0218	145.906	91.0183	632.7	91.0181	2572.77	91.0195	567.888	91.018	658.631	91.0186	2837.75	91.0172	275.823	93.1734	8677.99	91.0198	851.43
	91.0205	-295.007	91.0218	249.301	91.0183	680.693	91.0181	2824.23	91.0195	602.622	91.018	1088.38	91.0186	647.367	91.0172	431.149	93.1734	166.875	91.0198	920.962
	91.0205	402.228	91.0218	-541.397	91.0183	499.357	91.0181	2260.61	91.0195	288.522	91.018	841.499	91.0186	2399.42	91.0172	438.728	93.1734	8242.11	91.0198	928.025
	91.0205	-130.871	91.0218	-209.5	91.0183	677.406	91.0181	352.164	91.0195	401.065	91.018	352.172	91.0186	595.909	91.0172	474.955	93.4803	200.625	91.0198	1002.39
	91.0205	152.875	91.0218	-49.2999	91.0183	519.146	91.0181	703.923	91.0195	199.406	91.018	1324.67	91.0186	801.272	91.0172	498.34	93.4803	-241.59	91.0198	1044.43
	91.0205	95.0663	91.0218	-273.367	91.0183	509.094	91.0181	2209.04	91.0195	413.282	91.018	1236.67	91.0186	1365.56	91.0172	513.073	93.4803	344.281	91.0198	1302.02
	91.0205	-143.876	91.0218	108.36	91.0183	1097.47	91.0181	2006.37	91.0195	775.251	91.018	851.487	91.0186	2016.54	91.0172	518.414	93.4803	-189.137	91.0198	1393.21
	91.0205	-45.2069	91.0218	531.24	91.0183	331.203	91.0181	2407.27	91.0195	444.421	91.018	565.74	91.0186	2226.29	91.0172	575.608	93.4803	-177.902	91.0198	1986.71
	91.3177	-135.282	91.319	-186.193	91.3155	309.111	91.3152	67.2236	91.3167	830.832	91.3151	833.556	91.3158	448.812	91.3144	-21.2345	93.4803	-49.4086	91.3169	186.695
	91.3177	105.158	91.319	1299.46	91.3155	1284.39	91.3152	532.793	91.3167	-116.471	91.3151	958.556	91.3158	417.248	91.3144	46.8164	93.4803	76.2266	91.3169	284.662
	91.3177	-84.9004	91.319	-96.2773	91.3155	1103.8	91.3152	444.638	91.3167	450.427	91.3151	647.6	91.3158	360.679	91.3144	61.0537	93.4803	-105.149	91.3169	335.892
	91.3177	195.255	91.319	-117.318	91.3155	206.578	91.3152	1937	91.3167	218.294	91.3151	571.085	91.3158	1627.71	91.3144	189.108	93.4803	5585.07	91.3169	366.47
	91.3177	241.503	91.319	146.812	91.3155	412.998	91.3152	2266.5	91.3167	745.061	91.3151	508.947	91.3158	679.411	91.3144	254.929	93.4803	8716.35	91.3169	421.787
	91.3177	409.054	91.319	93.252	91.3155	564.395	91.3152	2546.41	91.3167	535.516	91.3151	731.511	91.3158	2832.57	91.3144	296.365	93.4803	177.824	91.3169	852.247
	91.3177	-293.304	91.319	211.397	91.3155	667.208	91.3152	2821.12	91.3167	606.539	91.3151	1061.1	91.3158	672.616	91.3144	436.944	93.4803	8230.18	91.3169	923.979
	91.3177	402.304	91.319	-579.394	91.3155	493.146	91.3152	2250.59	91.3167	306.046	91.3151	836.952	91.3158	2387.86	91.3144	451.172	93.7872	191.223	91.3169	930.07
	91.3177	-132.761	91.319	-267.102	91.3155	647.771	91.3152	342.239	91.3167	390.551	91.3151	352.042	91.3158	586.147	91.3144	481.359	93.7872	-227.586	91.3169	1009.56
	91.3177	24.6331	91.319	-114.705	91.3155	530.186	91.3152	547.897	91.3167	231.356	91.3151	1295.4	91.3158	711.669	91.3144	501.186	93.7872	374.238	91.3169	1135.49
	91.3177	97.5276	91.319	-284.762	91.3155	486.313	91.3152	2179.59	91.3167	453.706	91.3151	1219.51	91.3158	1420.2	91.3144	508.373	93.7872	-115.969	91.3169	1286.9
	91.3177	-143.967	91.319	-110.983	91.3155	1034.95	91.3152	1990.43	91.3167	839.913	91.3151	839.518	91.3158	2037.98	91.3144	518.759	93.7872	-157.52	91.3169	1379.24
	91.3177	-49.3478	91.319	455.318	91.3155	265.586	91.3152	2381.41	91.3167	531.691	91.3151	622.729	91.3158	2192.99	91.3144	565.515	93.7872	49.0929	91.3169	2003.81
	91.615	-136.5	91.6162	-174.225	91.6126	320.319	91.6124	124.046	91.6139	829.414	91.6123	774.423	91.6129	528.466	91.6115	-14.9419	93.7872	68.9961	91.6141	188.337
	91.615	103.69	91.6162	933.824	91.6126	1231.87	91.6124	549.369	91.6139	-156.464	91.6123	942.976	91.6129	405.419	91.6115	45.0304	93.7872	34.325	91.6141	286.35
	91.615	-87.3551	91.6162	-84.6992	91.6126	1058.45	91.6124	439.425	91.6139	440.487	91.6123	687.73	91.6129	432.535	91.6115	61.2383	93.7872	5556.63	91.6141	343.251
	91.615	190.561	91.6162	-160.912	91.6126	235.271	91.6124	1930.82	91.6139	260.291	91.6123	590.293	91.6129	1651.98	91.6115	183.977	93.7872	8748.42	91.6141	369.176
	91.615	241.161	91.6162	136.137	91.6126	418.841	91.6124	2289.97	91.6139	740.92	91.6123	512.087	91.6129	628.324	91.6115	240.727	93.7872	180.207	91.6141	427.422
	91.615	408.842	91.6162	38.334	91.6126	514.242	91.6124	2529.28	91.6139	542.313	91.6123	784.183	91.6129	2830.19	91.6115	305.412	93.7872	8241.01	91.6141	852.886
	91.615	-291.764	91.6162	169.022	91.6126	625.09	91.6124	2798.16	91.6139	594.05	91.6123	1027.25	91.6129	693.796	91.6115	439.556	94.094	171.57	91.6141	927.665
	91.615	403.735	91.6162	-581.285	91.6126	487.832	91.6124	2239.14	91.6139	299.656	91.6123	832.142	91.6129	2381.72	91.6115	464.01	94.094	-196.031	91.6141	933.15
	91.615	-133.907	91.6162	-298.781	91.6126	607.898	91.6124	378.903	91.6139	420.682	91.6123	387.724	91.6129	604.415	91.6115	483.657	94.094	389.645	91.6141	1016.95
	91.615	-84.6898	91.6162	-158.688	91.6126	544.38	91.6124	431.964	91.6139	267.339	91.6123	1292.79	91.6129	631.888	91.6115	504.021	94.094	-60.6589	91.6141	1171.56
	91.615	98.7886	91.6162	-271.434	91.6126	451.511	91.6124	2148.29	91.6139	498.349	91.6123	1185.21	91.6129	1457.55	91.6115	509.159	94.094	-141.277	91.6141	1271.7
	91.615	-144.119	91.6162	-367.34	91.6126	957.093	91.6124	1971.12	91.6139	844.298	91.6123	832.854	91.6129	2037.2	91.6115	518.14	94.094	177.786	91.6141	1368.8
	91.615	-53.632	91.6162	390.42	91.6126	219.83	91.6124	2377.28	91.6139	619.753	91.6123	682.527	91.6129	2144.57	91.6115	557.005	94.094	63.6328	91.6141	2011.86
	91.9122	-138.511	91.9135	-167.076	91.9098	360.177	91.9095	201.53	91.9111	827.423	91.9095	727.849	91.9101	614.47	91.9087	-8.28638	94.094	138.637	91.9113	177.202
	91.9122	100.395	91.9135	515.1	91.9098	1204.67	91.9095	589.41	91.9111	-147.673	91.9095	907.033	91.9101	419.172	91.9087	39.9258	94.094	5530.13	91.9113	289.584
	91.9122	-89.9858	91.9135	-103.906	91.9098	975.728	91.9095	428.383	91.9111	392.87	91.9095	718.211	91.9101	483.716	91.9087	71.3552	94.094	8762.09	91.9113	355.123
	91.9122	184.755	91.9135	-191.584	91.9098	249.937	91.9095	1929.5	91.9111	302.879	91.9095	636.811	91.9101	1653.48	91.9087	183.563	94.094	172.98	91.9113	374.177
	91.9122	241.476	91.9135	138.117	91.9098	438.739	91.9095	2287.78	91.9111	740.624	91.9095	520.247	91.9101	581.863	91.9087	232.079	94.094	8267.43	91.9113	425.261
	91.9122	408.925	91.9135	-2.82617	91.9098	492.474	91.9095	2522.71	91.9111	568.008	91.9095	797.955	91.9101	2828.32	91.9087	300.124	94.4009	148.199	91.9113	853.721
	91.9122	-291.202	91.9135	105.736	91.9098	562.92	91.9095	2760.42	91.9111	559.896	91.9095	981.069	91.9101	691.285	91.9087	439.639	94.4009	-155.484	91.9113	929.524
	91.9122	405.392	91.9135	-573.526	91.9098	488.529	91.9095	2226.08	91.9111	259.104	91.9095	824.077	91.9101	2381.62	91.9087	471.89	94.4009	391.59	91.9113	934.78
	91.9122	-134.076	91.9135	-298.457	91.9098	558.893	91.9095	446.08	91.9111	478.303	91.9095	438.169	91.9101	644.308	91.9087	483.21	94.4009	-42.7485	91.9113	1021.27
	91.9122	-151.015	91.9135	-179.053	91.9098	553.544	91.9095	377.109	91.9111	287.41	91.9095	1304.96	91.9101	564.957	91.9087	504.94	94.4009	-136.273	91.9113	1140.68
	91.9122	98.4425	91.9135	-234.246	91.9098	410.156	91.9095	2121.71	91.9111	527.376	91.9095	1139.87	91.9101	1457.37	91.9087	510.571	94.4009	311.065	91.9113	1258.5
	91.9122	-144.312	91.9135	-588.105	91.9098	880.616	91.9095	1950.06	91.9111	768.791	91.9095	820.658	91.9101	2006.56	91.9087	515.379	94.4009	58.1328	91.9113	1363.11
	91.9122	-57.2778	91.9135	342.242	91.9098	210.589	91.9095	2393.07	91.9111	685.353	91.9095	728.959	91.9101	2088.29	91.9087	551.211	94.4009	194.373	91.9113	2008.38
	92.2094	-140.73	92.2107	-169.27	92.207	416.353	92.2067	256.545	92.2083	824.495	92.2066	699.884	92.2073	680.676	92.2059	-1.45056	94.4009	5515.95	92.2085	161.76
	92.2094	96.2876	92.2107	117.381	92.207	1212.17	92.2067	639.534	92.2083	-97.9414	92.2066	849.33	92.2073	447.559	92.2059	36.6438	94.4009	8752.71	92.2085	296.001
	92.2094	-92.4966	92.2107	-146.996	92.207	872.52	92.2067	415.205	92.2083	327.027	92.2066	735.303	92.2073	517.773	92.2059	92.5278	94.4009	158.316	92.2085	366.828
	92.2094	180.526	92.2107	-202.564	92.207	239.658	92.2067	1932.06	92.2083	338.854	92.2066	711.466	92.2073	1629.58	92.2059	185.515	94.4009	8295.54	92.2085	377.79
	92.2094	242.312	92.2107	153.344	92.207	452.879	92.2067	2253.71	92.2083	734.9	92.2066	531.47	92.2073	540.731	92.2059	229.533	94.7078	129.594	92.2085	416.412
	92.2094	409.187	92.2107	-20.5996	92.207	498.413	92.2067	2525.25	92.2083	586.535	92.2066	771.796	92.2073	2825.33	92.2059	285.044	94.7078	-118.246	92.2085	855.852
	92.2094	-292.177	92.2107	15.8335	92.207	495.812	92.2067	2716.69	92.2083	503.862	92.2066	919.068	92.2073	655.146	92.2059	438.132	94.7078	388.383	92.2085	927.402
	92.2094	406.085	92.2107	-581.807	92.207	495.624	92.2067	2211.58	92.2083	187.769	92.2066	808.726	92.2073	2386.29	92.2059	472.251	94.7078	-59.506	92.2085	932.992
	92.2094	-133.172	92.2107	-273.883	92.207	507.955	92.2067	516.47	92.2083	543.048	92.2066	483.313	92.2073	684.571	92.2059	480.615	94.7078	-143.98	92.2085	1020.08
	92.2094	-160.284	92.2107	-175.937	92.207	555.558	92.2067	385.387	92.2083	276.033	92.2066	1319.23	92.2073	511.933	92.2059	502.133	94.7078	423.142	92.2085	1046.24
	92.2094	96.7546	92.2107	-174.977	92.207	371.011	92.2067	2104.81	92.2083	527.097	92.2066	1089.66	92.2073	1414.91	92.2059	508.961	94.7078	53.1641	92.2085	1247.79
	92.2094	-144.643	92.2107	-713.994	92.207	819.976	92.2067	1926.87	92.2083	618.006	92.2066	791.544	92.2073	1948.34	92.2059	510.615	94.7078	206.552	92.2085	1360.68
	92.2094	-59.7467	92.2107	306.402	92.207	241.728	92.2067	2420.87	92.2083	706.984	92.2066	749.651	92.2073	2039.2	92.2059	549.385	94.7078	5519.64	92.2085	1994.18
	92.5066	-142.623	92.5079	-181.311	92.5041	473.671	92.5039	253.409	92.5055	822.424	92.5038	691.444	92.5045	700.461	92.503	5.35217	94.7078	8725.13	92.5057	151.537
	92.5066	92.6359	92.5079	-189.787	92.5041	1249.99	92.5039	681.752	92.5055	-25.2744	92.5038	775.797	92.5045	474.835	92.503	40.5253	94.7078	142.047	92.5057	306.091
	92.5066	-94.2631	92.5079	-195.684	92.5041	769.371	92.5039	405.637	92.5055	271.644	92.5038	738.746	92.5045	541.608	92.503	124.623	94.7078	8312.96	92.5057	373.289
	92.5066	179.434	92.5079	-191.6	92.5041	208.989	92.5039	1935.59	92.5055	359.987	92.5038	797.124	92.5045	1586.4	92.503	187.926			92.5057	377.46
	92.5066	243.244	92.5079	175.07	92.5041	452.705	92.5039	2195.79	92.5055	714.086	92.5038	543.081	92.5045	509.365	92.503	233.083			92.5057	405.259
	92.5066	409.587	92.5079	-19.9043	92.5041	524.922	92.5039	2533.94	92.5055	577.32	92.5038	722.64	92.5045	2821.69	92.503	269.6			92.5057	860.073
	92.5066	-294.592	92.5079	-94.5969	92.5041	439.24	92.5039	2675.94	92.5055	434.583	92.5038	842.648	92.5045	589.138	92.503	436.034			92.5057	906.396
	92.5066	405.273	92.5079	-618.246	92.5041	506.688	92.5039	2196.07	92.5055	105.164	92.5038	782.214	92.5045	2394.62	92.503	466.686			92.5057	920.914
	92.5066	-131.388	92.5079	-241.82	92.5041	467.069	92.5039	563.757	92.5055	595.156	92.5038	512.645	92.5045	702.449	92.503	475.834			92.5057	927.813
	92.5066	-116.878	92.5079	-151.23	92.5041	556.333	92.5039	449.197	92.5055	233.484	92.5038	1330.45	92.5045	474.962	92.503	495.378			92.5057	1012.56
	92.5066	94.5337	92.5079	-95.2656	92.5041	341.379	92.5039	2097.6	92.5055	495.412	92.5038	1040.54	92.5045	1344.23	92.503	504.008			92.5057	1240.67
	92.5066	-145.29	92.5079	-719.172	92.5041	783.336	92.5039	1900.95	92.5055	422.054	92.5038	741.947	92.5045	1873.7	92.503	505.048			92.5057	1358.77
	92.5066	-60.8248	92.5079	273.129	92.5041	299.246	92.5039	2449.37	92.5055	673.334	92.5038	739.722	92.5045	2011.75	92.503	552.267			92.5057	1972.27
	92.8038	-143.95	92.8052	-201.105	92.8013	518.906	92.801	185.736	92.8027	826.568	92.8009	699.049	92.8017	663.011	92.8002	9.23291			92.8028	152.779
	92.8038	90.3976	92.8052	-372.832	92.8013	1303.51	92.801	700.727	92.8027	53.3442	92.8009	699.365	92.8017	488.686	92.8002	52.8997			92.8028	318.138
	92.8038	-94.5552	92.8052	-230.602	92.8013	682.06	92.801	401.22	92.8027	248.132	92.8009	733.205	92.8017	557.964	92.8002	163.424			92.8028	370.443
	92.8038	181.402	92.8052	-163.389	92.8013	174.572	92.801	1936.64	92.8027	360.2	92.8009	866.211	92.8017	1536.6	92.8002	190.151			92.8028	373.248
	92.8038	243.737	92.8052	192.844	92.8013	443.878	92.801	2131.57	92.8027	673.921	92.8009	550.617	92.8017	494.617	92.8002	241.604			92.8028	397.246
	92.8038	410.138	92.8052	-17.8398	92.8013	564.66	92.801	2545.09	92.8027	532.054	92.8009	675.752	92.8017	2819.37	92.8002	262.772			92.8028	749.06
	92.8038	-297.604	92.8052	-211.284	92.8013	405.68	92.801	2644.14	92.8027	368.045	92.8009	759.719	92.8017	507.947	92.8002	434.673			92.8028	865.866
	92.8038	403.341	92.8052	-676.426	92.8013	518.418	92.801	2179.82	92.8027	40.2573	92.8009	743.084	92.8017	2406.35	92.8002	459.692			92.8028	911.824
	92.8038	-129.226	92.8052	-221.336	92.8013	446.754	92.801	571.714	92.8027	620.431	92.8009	524.72	92.8017	687.163	92.8002	469.326			92.8028	921.373
	92.8038	-43.4456	92.8052	-109.469	92.8013	565.223	92.801	552.779	92.8027	176.25	92.8009	1342.84	92.8017	455.56	92.8002	486.427			92.8028	999.612
	92.8038	92.7047	92.8052	-0.324219	92.8013	323.02	92.801	2095.79	92.8027	440.059	92.8009	998.153	92.8017	1271.59	92.8002	498.032			92.8028	1239.82
	92.8038	-146.414	92.8052	-618.335	92.8013	770.806	92.801	1873.68	92.8027	225.753	92.8009	679.96	92.8017	1798.29	92.8002	500.218			92.8028	1355.55
	92.8038	-60.6105	92.8052	234.344	92.8013	357.446	92.801	2467.12	92.8027	589.429	92.8009	703.202	92.8017	2012.78	92.8002	559.07			92.8028	1945.93
	93.101	-144.786	93.1024	-224.332	93.0985	542.959	93.0982	78.9316	93.0999	843.153	93.0981	715.771	93.0988	582.813	93.0973	4.62146			93.1	166.824
	93.101	89.813	93.1024	-447.873	93.0985	1354.87	93.0982	688.561	93.0999	128.903	93.0981	634.707	93.0988	485.48	93.0973	69.5227			93.1	328.244
	93.101	-92.9379	93.1024	-240.516	93.0985	616.31	93.0982	394.591	93.0999	259.888	93.0981	727.34	93.0988	564.603	93.0973	192.791			93.1	356.784
	93.101	185.27	93.1024	-130.215	93.0985	153.609	93.0982	1933.42	93.0999	339.949	93.0981	896.015	93.0988	1494.93	93.0973	200.166			93.1	367.263
	93.101	243.467	93.1024	199.793	93.0985	439.05	93.0982	2077.23	93.0999	618.624	93.0981	547.845	93.0988	499.227	93.0973	252.16			93.1	396.303
	93.101	410.829	93.1024	-31.9062	93.0985	613.455	93.0982	2554.72	93.0999	454.758	93.0981	651.657	93.0988	2819.59	93.0973	268.018			93.1	604.41
	93.101	-300.047	93.1024	-317.74	93.0985	403.041	93.0982	2623.04	93.0999	320.771	93.0981	683.492	93.0988	429.545	93.0973	435.821			93.1	871.403
	93.101	401.278	93.1024	-736.553	93.0985	527.595	93.0982	2162.85	93.0999	18.0464	93.0981	694.561	93.0988	2420.88	93.0973	455.921			93.1	902.985
	93.101	-127.301	93.1024	-227.82	93.0985	448.985	93.0982	536.604	93.0999	611.812	93.0981	521.26	93.0988	645.099	93.0973	462.856			93.1	916.607
	93.101	30.5695	93.1024	-58.23	93.0985	587.582	93.0982	667.541	93.0999	126.292	93.0981	1364.51	93.0988	449.395	93.0973	478.044			93.1	983.432
	93.101	91.7998	93.1024	97.332	93.0985	310.939	93.0982	2094.35	93.0999	372.307	93.0981	965.917	93.0988	1222.3	93.0973	493.359			93.1	1247.78
	93.101	-148.032	93.1024	-459.74	93.0985	775.104	93.0982	1848.61	93.0999	69.8389	93.0981	621.472	93.0988	1735.77	93.0973	497.385			93.1	1351.27
	93.101	-59.4878	93.1024	188.225	93.0985	393.032	93.0982	2465.65	93.0999	475.575	93.0981	651.175	93.0988	2040.01	93.0973	567.134			93.1	1917.84
	93.3982	-145.388	93.3996	-244.744	93.3956	541.387	93.3954	-26.8369	93.397	874.027	93.3953	732.96	93.396	493.856	93.3945	-13.1135			93.3972	190.991
	93.3982	90.3805	93.3996	-468.812	93.3956	1389.56	93.3954	646.483	93.397	198.931	93.3953	591.354	93.396	470.454	93.3945	82.9435			93.3972	332.048
	93.3982	-89.6298	93.3996	-226.742	93.3956	568.402	93.3954	372.419	93.397	292.904	93.3953	729.846	93.396	559.731	93.3945	197.026			93.3972	334.456
	93.3982	189.733	93.3996	-108.795	93.3956	152.953	93.3954	1926.81	93.397	308.144	93.3953	882.305	93.396	1472.75	93.3945	224.811			93.3972	361.889
	93.3982	242.541	93.3996	197.77	93.3956	446.644	93.3954	2038.76	93.397	559.125	93.3953	529.385	93.396	516.504	93.3945	260.455			93.3972	403.058
	93.3982	411.565	93.3996	-68.3125	93.3956	668.606	93.3954	2558.95	93.397	357.433	93.3953	657.092	93.396	2821.22	93.3945	281.699			93.3972	496.645
	93.3982	-301.112	93.3996	-401.531	93.3956	432.527	93.3954	2610.97	93.397	302.141	93.3953	627.105	93.396	366.92	93.3945	441.092			93.3972	874.688
	93.3982	400	93.3996	-777.79	93.3956	532.247	93.3954	2145.32	93.397	46.5918	93.3953	644.731	93.396	2435.86	93.3945	457.865			93.3972	896.606
	93.3982	-126.056	93.3996	-268.266	93.3956	464.51	93.3954	464.786	93.397	569.289	93.3953	503.215	93.396	594.651	93.3945	458.944			93.3972	915.466
	93.3982	84.1565	93.3996	-7.23602	93.3956	620.458	93.3954	753.591	93.397	98.2021	93.3953	1398.48	93.396	443.249	93.3945	472.514			93.3972	966.588
	93.3982	91.7318	93.3996	180.445	93.3956	295.754	93.3954	2090.61	93.397	301.559	93.3953	943.257	93.396	1208.59	93.3945	490.086			93.3972	1264.25
	93.3982	-149.919	93.3996	-307.432	93.3956	784.525	93.3954	1829.38	93.397	-26.248	93.3953	581.091	93.396	1692.41	93.3945	497.166			93.3972	1347.43
	93.3982	-58.066	93.3996	138.693	93.3956	397.083	93.3954	2441.86	93.397	359.047	93.3953	597.497	93.396	2084	93.3945	572.841			93.3972	1890.65
	93.6954	-146.033	93.6969	-256.408	93.6928	515.317	93.6925	-99.8779	93.6942	913.586	93.6924	742.882	93.6932	431.505	93.6917	-43.1815			93.6944	220.342
	93.6954	91.2242	93.6969	-499.91	93.6928	1400.29	93.6925	584.472	93.6942	261.05	93.6924	569.747	93.6932	453.058	93.6917	87.1851			93.6944	308.988
	93.6954	-85.5753	93.6969	-201.559	93.6928	530.35	93.6925	324.938	93.6942	325.967	93.6924	744.761	93.6932	547.787	93.6917	203.421			93.6944	327.277
	93.6954	193.892	93.6969	-113.473	93.6928	166.471	93.6925	1919.25	93.6942	279.144	93.6924	842.077	93.6932	1473.67	93.6917	231.237			93.6944	358.273
	93.6954	241.446	93.6969	195.789	93.6928	464.083	93.6925	2011.17	93.6942	507.826	93.6924	494.89	93.6932	531.991	93.6917	262.655			93.6944	414.624
	93.6954	412.201	93.6969	-119.609	93.6928	724.527	93.6925	2554.83	93.6942	254.907	93.6924	684.126	93.6932	2821.45	93.6917	296.08			93.6944	437.57
	93.6954	-300.789	93.6969	-459.003	93.6928	486.17	93.6925	2604.48	93.6942	310.389	93.6924	596.269	93.6932	323.545	93.6917	450.945			93.6944	874.901
	93.6954	399.8	93.6969	-790.76	93.6928	533.199	93.6925	2127.63	93.6942	112.198	93.6924	603.443	93.6932	2447.41	93.6917	459.243			93.6944	893.115
	93.6954	-125.607	93.6969	-338.461	93.6928	476.837	93.6925	369.605	93.6942	500.3	93.6924	472.225	93.6932	555.247	93.6917	465.182			93.6944	917.814
	93.6954	111.863	93.6969	33.2434	93.6928	654.568	93.6925	774.647	93.6942	93.5371	93.6924	1438.05	93.6932	419.774	93.6917	470.656			93.6944	951.199
	93.6954	92.0222	93.6969	235.801	93.6928	268.818	93.6925	2084.67	93.6942	234.1	93.6924	926.136	93.6932	1225.08	93.6917	486.092			93.6944	1284.86
	93.6954	-151.661	93.6969	-218.571	93.6928	787.327	93.6925	1817.17	93.6942	-69.8838	93.6924	563.825	93.6932	1665.8	93.6917	499.378			93.6944	1344.96
	93.6954	-57.0247	93.6969	91.1562	93.6928	376.729	93.6925	2399.29	93.6942	263.854	93.6924	554.293	93.6932	2130.97	93.6917	573.372			93.6944	1867.79
	93.9926	-146.866	93.9941	-257.348	93.99	472.584	93.9897	-131.044	93.9914	950.957	93.9896	741.161	93.9904	414.5	93.9888	-78.1652			93.9915	249.118
	93.9926	91.6121	93.9941	-589.934	93.99	1388.15	93.9897	518.79	93.9914	308.849	93.9896	562.303	93.9904	440.679	93.9888	81.4656			93.9915	287.26
	93.9926	-82.1213	93.9941	-181.598	93.99	495.228	93.9897	254.388	93.9914	342.962	93.9896	769.827	93.9904	539.9	93.9888	210.805			93.9915	315.471
	93.9926	197.261	93.9941	-148.971	93.99	181.129	93.9897	1912.55	93.9914	266.169	93.9896	803.609	93.9904	1492.5	93.9888	220.735			93.9915	355.973
	93.9926	240.724	93.9941	202.66	93.99	479.778	93.9897	1985.33	93.9914	473.183	93.9896	451.24	93.9904	531.235	93.9888	257.346			93.9915	423.491
	93.9926	412.618	93.9941	-172.188	93.99	770.757	93.9897	2541.42	93.9914	160.876	93.9896	716.721	93.9904	2817.97	93.9888	304.655			93.9915	426.178
	93.9926	-299.757	93.9941	-496.764	93.99	547.165	93.9897	2599.66	93.9914	334.089	93.9896	584.776	93.9904	294.456	93.9888	463.337			93.9915	872.852
	93.9926	400.268	93.9941	-782.772	93.99	534.346	93.9897	2110.11	93.9914	186.057	93.9896	577.017	93.9904	2452.06	93.9888	464.085			93.9915	891.363
	93.9926	-125.802	93.9941	-423.988	93.99	470.476	93.9897	268.988	93.9914	419.802	93.9896	433.887	93.9904	537.639	93.9888	471.758			93.9915	921.685
	93.9926	118.416	93.9941	54.2432	93.99	680.399	93.9897	717.475	93.9914	104.205	93.9896	1469.81	93.9904	367.105	93.9888	475.523			93.9915	938.535
	93.9926	92.2671	93.9941	262.047	93.99	227.39	93.9897	2077.71	93.9914	174.898	93.9896	909.797	93.9904	1253.98	93.9888	479.042			93.9915	1302.59
	93.9926	-152.858	93.9941	-223.691	93.99	775.967	93.9897	1809.83	93.9914	-86.5898	93.9896	562.935	93.9904	1648	93.9888	503.031			93.9915	1343.18
	93.9926	-56.8846	93.9941	48.0938	93.99	346.898	93.9897	2347.61	93.9914	204.164	93.9896	529.011	93.9904	2166.18	93.9888	568.109			93.9915	1852.65
	94.2898	-147.85	94.2913	-251.381	94.2872	426.622	94.2868	-132.073	94.2886	976.446	94.2868	727.634	94.2875	438.834	94.286	-107.663			94.2887	272.088
	94.2898	91.2926	94.2913	-758.619	94.2872	1360.93	94.2868	466.986	94.2886	334.494	94.2868	558.324	94.2875	434.566	94.286	70.4236			94.2887	274.42
	94.2898	-80.4187	94.2913	-179.309	94.2872	459.442	94.2868	175.186	94.2886	340.017	94.2868	798.953	94.2875	548.573	94.286	201.303			94.2887	301.549
	94.2898	199.568	94.2913	-207.271	94.2872	185.98	94.2868	1906.7	94.2886	275.098	94.2868	790.69	94.2875	1518.48	94.286	216.274			94.2887	353.756
	94.2898	240.638	94.2913	220.004	94.2872	481.293	94.2868	1955.84	94.2886	456.684	94.2868	409.973	94.2875	507.663	94.286	246.083			94.2887	433.527
	94.2898	412.779	94.2913	-216.336	94.2872	795.655	94.2868	2520.44	94.2886	85.0371	94.2868	740.38	94.2875	2810.76	94.286	305.876			94.2887	437.654
	94.2898	-298.829	94.2913	-528.803	94.2872	595.345	94.2868	2593.18	94.2886	357.987	94.2868	577.271	94.2875	271.304	94.286	468.425			94.2887	870.276
	94.2898	400.667	94.2913	-772.582	94.2872	540.554	94.2868	2092.52	94.2886	238.695	94.2868	564.492	94.2875	2448.99	94.286	469.071			94.2887	889.793
	94.2898	-126.388	94.2913	-506.062	94.2872	438.524	94.2868	181.909	94.2886	347.103	94.2868	397.509	94.2875	540.708	94.286	474.201			94.2887	924.602
	94.2898	108.515	94.2913	50.3893	94.2872	693.444	94.2868	599.613	94.2886	119.59	94.2868	1482.44	94.2875	285.602	94.286	477.885			94.2887	929.039
	94.2898	92.4279	94.2913	269.766	94.2872	176.506	94.2868	2070.03	94.2886	128.691	94.2868	891.351	94.2875	1276.14	94.286	486.015			94.2887	1311.22
	94.2898	-153.36	94.2913	-317.866	94.2872	749.293	94.2868	1802.96	94.2886	-103.747	94.2868	564.72	94.2875	1630.78	94.286	506.603			94.2887	1340.37
	94.2898	-57.8226	94.2913	7.61523	94.2872	319.914	94.2868	2299.61	94.2886	182.983	94.2868	523.362	94.2875	2178.62	94.286	558.785			94.2887	1846.59
	94.587	-148.82	94.5886	-245.875	94.5843	391.6	94.584	-123.314	94.5858	987.189	94.5839	705.448	94.5847	485.328	94.5831	-124.23			94.5859	271.556
	94.587	90.4745	94.5886	-996.721	94.5843	1329.5	94.584	441.126	94.5858	335.635	94.5839	549.202	94.5847	430.581	94.5831	60.9301			94.5859	286.174
	94.587	-80.8818	94.5886	-197.023	94.5843	421.89	94.584	105.551	94.5858	324.383	94.5839	826.638	94.5847	580.695	94.5831	183.23			94.5859	291.317
	94.587	200.712	94.5886	-271.426	94.5843	177.576	94.584	1900.6	94.5858	302.485	94.5839	811.398	94.5847	1540.99	94.5831	216.762			94.5859	350.691
	94.587	241.059	94.5886	241.543	94.5843	463.341	94.584	1923.94	94.5858	453.297	94.5839	381.086	94.5847	464.862	94.5831	232.242			94.5859	435.167
	94.587	412.73	94.5886	-250.953	94.5843	793.571	94.584	2495.69	94.5858	30.9668	94.5839	748.985	94.5847	2801.97	94.5831	302.927			94.5859	458.001
	94.587	-298.442	94.5886	-570.08	94.5843	615.988	94.584	2583	94.5858	369.904	94.5839	557.874	94.5847	247.524	94.5831	455.917			94.5859	868.725
	94.587	400.452	94.5886	-778.478	94.5843	554.49	94.584	2074.13	94.5858	253.892	94.5839	558.378	94.5847	2440.56	94.5831	474.082			94.5859	887.517
	94.587	-127.13	94.5886	-569.953	94.5843	385.203	94.584	122.64	94.5858	298.645	94.5839	371.743	94.5847	555.216	94.5831	476.266			94.5859	922.512
	94.587	82.5653	94.5886	22.3021	94.5843	695.438	94.584	458.285	94.5858	131.73	94.5839	1473.96	94.5847	186.476	94.5831	489.668			94.5859	925.003
	94.587	92.7382	94.5886	274.277	94.5843	126.095	94.584	2060.79	94.5858	98.3711	94.5839	870.396	94.5847	1280.74	94.5831	494.57			94.5859	1308.48
	94.587	-153.356	94.5886	-467.191	94.5843	711.729	94.584	1792.37	94.5858	-137.649	94.5839	556.617	94.5847	1609.33	94.5831	508.643			94.5859	1335.3
	94.587	-59.6425	94.5886	-34.5508	94.5843	300.475	94.584	2265.97	94.5858	193.934	94.5839	533.741	94.5847	2165.84	94.5831	548.398			94.5859	1847.66

## Sheet: Housekeeping stability
Clone	DAT	ACPB	BTUB	GAPDH	Log[ACPB]	Log[BTUB]	Log[GAPDH]	ngDNA ACPB	ngDNA BTUB	ngDNA GAPDH	XG(ACPB-BTUB)	XG(ACPB-GAPDH)	XG(BTUB-GAPDH)
EET	0	23.489	24.001	20.446	0.723	0.834	0.744	5.284	6.816	5.549	6.001	5.415	6.15
EET	0	23.79	24.452	22.816	0.644	0.705	0.054	4.405	5.071	1.131	4.726	2.232	2.395
EET	0	24.19	24.5	22.117	0.539	0.691	0.257	3.456	4.915	1.808	4.121	2.5	2.981
EET	23	23.66	24.554	21.046	0.678	0.676	0.569	4.766	4.743	3.71	4.754	4.205	4.195
EET	23	23.579	25.568	22.771	0.699	0.388	0.067	5.005	2.443	1.166	3.496	2.415	1.687
EET	23	23.648	24.533	21.455	0.681	0.682	0.45	4.799	4.81	2.82	4.805	3.679	3.683
EET	26	22.541	23.325	19.322	0.973	1.026	1.072	9.387	10.609	11.794	9.979	10.522	11.186
EET	26	22.969	25.178	24.771	0.86	0.499	-0.516	7.244	3.154	0.305	4.78	1.486	0.98
EET	26	23.791	27.693	19.866	0.644	-0.216	0.913	4.402	0.608	8.19	1.635	6.004	2.231
ICS	0	22.709	23.193	23.732	0.928	1.063	-0.213	8.478	11.568	0.612	9.903	2.277	2.66
ICS	0	23.869	24.725	18.73	0.623	0.628	1.244	4.199	4.242	17.539	4.22	8.581	8.626
ICS	0	24.867	25.232	22.746	0.36	0.483	0.074	2.293	3.043	1.185	2.642	1.649	1.899
ICS	23	24.655	25.332	20.988	0.416	0.455	0.586	2.608	2.851	3.858	2.727	3.172	3.317
ICS	23	23.345	24.513	21.632	0.761	0.688	0.399	5.766	4.874	2.504	5.301	3.8	3.493
ICS	23	24.274	25.765	21.671	0.516	0.332	0.387	3.284	2.147	2.439	2.655	2.83	2.288
ICS	26	22.586	24.03	19.904	0.96	0.825	0.902	9.13	6.687	7.981	7.814	8.537	7.306
ICS	26	22.659	24.11	21.655	0.941	0.802	0.392	8.738	6.345	2.465	7.446	4.641	3.955
ICS	26	22.732	24.492	19.392	0.922	0.694	1.051	8.361	4.941	11.251	6.427	9.699	7.456
TSH	0	22.533	23.195	20.133	0.975	1.063	0.835	9.431	11.553	6.845	10.438	8.034	8.892
TSH	0	22.615	23.61	23.215	0.953	0.945	-0.063	8.975	8.802	0.865	8.888	2.787	2.76
TSH	0	24.925	24.911	19.839	0.345	0.575	0.921	2.214	3.755	8.339	2.883	4.297	5.596
TSH	23	22.473	23.455	20.033	0.99	0.989	0.865	9.78	9.745	7.32	9.762	8.461	8.446
TSH	23	22.574	23.886	21.392	0.964	0.866	0.468	9.201	7.347	2.94	8.222	5.201	4.648
TSH	23	24.911	24.112	21.013	0.349	0.802	0.579	2.233	6.335	3.794	3.761	2.91	4.902
TSH	26	23.062	23.969	20.033	0.835	0.843	0.865	6.845	6.959	7.32	6.902	7.079	7.137
TSH	26	23.19	24.775	19.274	0.802	0.613	1.086	6.336	4.106	12.18	5.101	8.785	7.072
TSH	26	23.236	25.064	20.395	0.79	0.531	0.759	6.161	3.397	5.74	4.575	5.947	4.416
